# Supplementary material for: The Resistance of Narrow-Leafed Lupin to Diaporthe toxica Is Based on the Rapid Activation of Defense Response Genes
Source: Int J Mol Sci. 2021 Jan 8;22(2):574. doi: 10.3390/ijms22020574 (PMC7827158; doi:10.3390/ijms22020574)
Supplement: Supplementary file 1 [file ijms-22-00574-s001.xlsx]

## Sheet: Table_S1
Resistance of narrow-leafed lupin to Diaporthe toxica is based on rapid activation of defense response genes
International Journal of Molecular Sciences
Supplementary Table S1. RAPD primers selected for the analysis of Diaporthe toxica isolates and the list polymorphic bands obtained.
Primer	Sequence	Polymorphic product length (bp)	DTOX1	DTOX2	DTOX3	DTOX4	DTOXA1	DTOXA2	WAC8782	WAC8787	WAC9513	WAC8771
OPC02	GTGAGGCGTC	370 bp	0	0	0	0	1	1	1	0	1	1
OPC09	CTCACCGTCC	-	-	-	-	-	-	-	-	-	-	-
OPC20	ACTTCGCCAC	890 bp	1	1	1	1	0	0	0	1	0	0
OPG01	CTACGGAGGA	-	-	-	-	-	-	-	-	-	-	-
OPG03	GAGCCCTCCA	380 bp	1	1	1	1	1	0	0	1	0	0
OPG05	CTGAGACGGA	-	-	-	-	-	-	-	-	-	-	-
OPJ10	AAGCCCGAGG	-	-	-	-	-	-	-	-	-	-	-
OPJ14	CACCCGGATG	480 bp	0	1	0	0	0	1	0	0	1	1
OPL02	TGGGCGTCAA	-	-	-	-	-	-	-	-	-	-	-
OPL05	ACGCAGGCAC	340 bp	1	1	1	1	0	1	1	1	0	0
OPL10	TGGGAGATGG	1350 bp	1	1	1	1	0	0	0	1	0	0
OPL12	GGGCGGTACT	1700 bp	1	1	1	1	0	0	0	0	0	0

## Sheet: Table_S2
Resistance of narrow-leafed lupin to Diaporthe toxica is based on rapid activation of defense response genes
International Journal of Molecular Sciences
Supplementary Table S2. RNA concentration, RNA quality parameters and number of read pairs obtained from RNA sequencing.
Accession	Line	Variant	Term	Repeat	RNA ng/µl	A260/A280 ratio	RQI	No. of read pairs (mln)
96121	Emir	Inoculated	1 DPI	1	315.38	1.74	8.05	39176529
96121	Emir	Inoculated	1 DPI	2	400.455	1.8	8.25	43671275
96121	Emir	Inoculated	1 DPI	3	321.4	1.795	8.1	39624304
96121	Emir	Inoculated	5 DPI	1	108.195	1.46	8	39156975
96121	Emir	Inoculated	5 DPI	2	110.3	1.525	8.05	39739164
96121	Emir	Inoculated	5 DPI	3	86.855	1.685	7.95	43143644
96121	Emir	Inoculated	9 DPI	1	198.74	1.83	8.1	40937299
96121	Emir	Inoculated	9 DPI	2	236.76	2.035	8.15	47610245
96121	Emir	Inoculated	9 DPI	3	481.3	2.015	8.15	49981525
96121	Emir	Control	1 DPI	1	279.385	1.75	8.2	41155236
96121	Emir	Control	1 DPI	2	303.945	1.795	8.1	49252725
96121	Emir	Control	1 DPI	3	205.87	1.59	8.3	35989630
96121	Emir	Control	5 DPI	1	116.535	1.68	8	36405557
96121	Emir	Control	5 DPI	2	107.16	1.695	8.05	50748221
96121	Emir	Control	5 DPI	3	101.905	1.935	8.15	37674058
96121	Emir	Control	9 DPI	1	162.005	1.995	7.9	46862143
96121	Emir	Control	9 DPI	2	130.615	1.925	7.75	43557778
96121	Emir	Control	9 DPI	3	125.585	1.96	7.8	45270589
96191	Wonga	Inoculated	1 DPI	1	553.815	1.76	7.7	40971748
96191	Wonga	Inoculated	1 DPI	2	629.79	1.715	7.7	35215363
96191	Wonga	Inoculated	1 DPI	3	104.91	1.8	8.95	40865994
96191	Wonga	Inoculated	5 DPI	1	640.57	1.75	7.9	51602360
96191	Wonga	Inoculated	5 DPI	2	452.49	1.845	7.7	46499686
96191	Wonga	Inoculated	5 DPI	3	386.455	1.64	7.7	40059848
96191	Wonga	Inoculated	9 DPI	1	418.48	1.885	8.35	46966046
96191	Wonga	Inoculated	9 DPI	2	393.525	1.845	8.25	41869027
96191	Wonga	Inoculated	9 DPI	3	628.205	1.73	7.9	46627183
96191	Wonga	Control	1 DPI	1	431.47	1.62	8.2	36043005
96191	Wonga	Control	1 DPI	2	407.735	1.585	8.3	36618784
96191	Wonga	Control	1 DPI	3	313.125	1.58	8.05	33304130
96191	Wonga	Control	5 DPI	1	495.805	1.72	8	53370557
96191	Wonga	Control	5 DPI	2	528.945	1.72	8.05	36890143
96191	Wonga	Control	5 DPI	3	461.45	1.66	8.1	42457360
96191	Wonga	Control	9 DPI	1	289.48	2.21	8.2	49741314
96191	Wonga	Control	9 DPI	2	180.88	1.58	8	47637516
96191	Wonga	Control	9 DPI	3	278.085	1.79	7.8	49163317
26979	75A:258	Inoculated	1 DPI	1	411.56	1.61	8	30851564
26979	75A:258	Inoculated	1 DPI	2	361.005	1.615	7.85	33256344
26979	75A:258	Inoculated	1 DPI	3	318.38	1.665	5.8	37528935
26979	75A:258	Inoculated	5 DPI	1	529.91	1.675	8.05	33151518
26979	75A:258	Inoculated	5 DPI	2	609.4	1.565	8	43155793
26979	75A:258	Inoculated	5 DPI	3	549.755	2.42	7.85	41927662
26979	75A:258	Inoculated	9 DPI	1	309.985	1.795	7.95	45825732
26979	75A:258	Inoculated	9 DPI	2	413.54	1.785	7.95	54454531
26979	75A:258	Inoculated	9 DPI	3	348.06	1.68	7.95	50315061
26979	75A:258	Inoculated	16 DPI	1	314.675	1.75	8.1	35903733
26979	75A:258	Inoculated	16 DPI	2	290.565	1.9	7.9	40920164
26979	75A:258	Inoculated	16 DPI	3	187.87	1.575	5.3	62204466
26979	75A:258	Inoculated	23 DPI	1	206.535	1.78	7.95	39683203
26979	75A:258	Inoculated	23 DPI	2	210.245	1.61	7.95	38677021
26979	75A:258	Inoculated	23 DPI	3	197.95	1.75	7.9	47430285
26979	75A:258	Control	1 DPI	1	358.24	1.72	8.1	43106808
26979	75A:258	Control	1 DPI	2	293.635	1.765	8.15	40509569
26979	75A:258	Control	1 DPI	3	347.52	1.905	5.55	38011160
26979	75A:258	Control	5 DPI	1	499.765	2.375	7.8	43831295
26979	75A:258	Control	5 DPI	2	379.435	2.26	7.85	44898214
26979	75A:258	Control	5 DPI	3	396.755	2.005	7.8	35509789
26979	75A:258	Control	9 DPI	1	255.665	1.84	7.85	40911448
26979	75A:258	Control	9 DPI	2	235.09	1.755	7.85	52243967
26979	75A:258	Control	9 DPI	3	254.015	1.73	7.85	45659964
26979	75A:258	Control	16 DPI	1	58.77	1.995	8.05	43507473
26979	75A:258	Control	16 DPI	2	74.76	2.215	7.95	51675731
26979	75A:258	Control	16 DPI	3	58.21	2.115	7.95	35321919
26979	75A:258	Control	23 DPI	1	257.01	1.705	8	47640192
26979	75A:258	Control	23 DPI	2	170.08	1.79	8	48510431
26979	75A:258	Control	23 DPI	3	211.08	1.815	8.05	45126455
DPI - days post inoculation
A260/A280 ratio - the ratios of the absorbance values of 260 nm vs. 280 nm
RQI - RNA quality indicator
No. of read pairs - Number of read pairs obtained from RNA sequencing

## Sheet: Table_S3
Resistance of narrow-leafed lupin to Diaporthe toxica is based on rapid activation of defense response genes
International Journal of Molecular Sciences
Supplementary Table S3. Typical domains identified using Disease Resistance Analysis and Gene Orthology (DRAGO 2) tool at Plant Resistance Genes database (PRGdb).
Gene	CC	Kinase	LRR	NBS	TIR	TM
TanjilG_00412				1		5
TanjilG_00438		7				5
TanjilG_00664		6				5
TanjilG_00718		3	2			7
TanjilG_00740		1				1
TanjilG_01385			3			3
TanjilG_01488			4			5
TanjilG_01502			2			1
TanjilG_01579		6				1
TanjilG_01694		6	4			5
TanjilG_01774		3				2
TanjilG_01910				1		4
TanjilG_02265		6	2			5
TanjilG_02293		1
TanjilG_02534	2		1	5		2
TanjilG_02826		6				3
TanjilG_02969				1		1
TanjilG_03268		1
TanjilG_03461	3	4				3
TanjilG_03486		6				1
TanjilG_03646		3				6
TanjilG_03689			1
TanjilG_03690		5				2
TanjilG_03729			3			3
TanjilG_03867	5		1	1		3
TanjilG_04274		5	1			5
TanjilG_04419		3				4
TanjilG_04498		4	2			7
TanjilG_04645		5				5
TanjilG_04690			3			4
TanjilG_04849	3	4				2
TanjilG_05042			3	6	3	5
TanjilG_05682		3	1			6
TanjilG_05905			3			4
TanjilG_05947		5				5
TanjilG_05974	1	2				2
TanjilG_06162	2		1	3		4
TanjilG_06163			1	1		2
TanjilG_06579		6	1			7
TanjilG_06591			3			5
TanjilG_06637		6				1
TanjilG_06757					2	1
TanjilG_06775		1				1
TanjilG_06795		3				1
TanjilG_06887			4
TanjilG_07106		6				2
TanjilG_07188	1	6	2			6
TanjilG_07369	1	4				3
TanjilG_07606		5				3
TanjilG_07737		3				4
TanjilG_08103		7	2			6
TanjilG_08599		5				3
TanjilG_08680		5				2
TanjilG_08733		5	5			5
TanjilG_08736		4	2			4
TanjilG_08833		5				4
TanjilG_08934		4				3
TanjilG_09032	1	7				8
TanjilG_09033		7				2
TanjilG_09330		7				2
TanjilG_09412	1		1			1
TanjilG_09495		5	2			5
TanjilG_09710		5				2
TanjilG_09776			2			1
TanjilG_09863		6				1
TanjilG_09975	1	6				1
TanjilG_10155		4
TanjilG_10214			5			6
TanjilG_10232			3		4	4
TanjilG_10325		5				5
TanjilG_10330		5	3			5
TanjilG_10361		6	4			5
TanjilG_10469		1				1
TanjilG_10976				1		15
TanjilG_11123	2	5				4
TanjilG_11236		6				2
TanjilG_11272		5				3
TanjilG_11279		5				2
TanjilG_11612	1	5				2
TanjilG_11662					3
TanjilG_11764		7				4
TanjilG_11768		7	2			4
TanjilG_11769		4
TanjilG_12131		1				1
TanjilG_12133		1				2
TanjilG_12321		5				2
TanjilG_12322		1				1
TanjilG_12482		5	2			3
TanjilG_12748		5				1
TanjilG_12785			3			4
TanjilG_12920	1			1
TanjilG_12982		5				5
TanjilG_12991		1				2
TanjilG_13040		5	3			7
TanjilG_13319		1
TanjilG_13411		5				2
TanjilG_13507		6				2
TanjilG_13616		2				4
TanjilG_13618		2				4
TanjilG_13709			4	1	3	3
TanjilG_13774		1
TanjilG_13837		7	3			7
TanjilG_13893		6				5
TanjilG_13895		5				2
TanjilG_14283		3	4			3
TanjilG_14728		1
TanjilG_14767		2	1			4
TanjilG_15019			2			2
TanjilG_15180		5
TanjilG_15295		5	2			5
TanjilG_15496		4	4			6
TanjilG_15580		5				2
TanjilG_15647		4	1			4
TanjilG_15688		6				2
TanjilG_15840		6				2
TanjilG_16182		6				5
TanjilG_16308				1		13
TanjilG_16604		5				3
TanjilG_17162		2				1
TanjilG_17166		1				1
TanjilG_18107			2			2
TanjilG_18335		6				4
TanjilG_18455		5	6			5
TanjilG_18513			2			1
TanjilG_18960		1				4
TanjilG_18975		3	1			5
TanjilG_19547		6				2
TanjilG_19548		6				3
TanjilG_19549		6				3
TanjilG_19550		6				3
TanjilG_19655		6				5
TanjilG_19877		6	3			5
TanjilG_19899		4	2			7
TanjilG_20154		3				2
TanjilG_20188		5				2
TanjilG_20692		4
TanjilG_20831		6				4
TanjilG_21020			1	3
TanjilG_21235		1				1
TanjilG_21266		7				5
TanjilG_22102		2
TanjilG_22196	1	6				4
TanjilG_22286		6				3
TanjilG_22447		4	2			6
TanjilG_22450		6				2
TanjilG_22640	1		1	6		2
TanjilG_22769		2				1
TanjilG_23321		6				4
TanjilG_23836		6				2
TanjilG_24296		4				4
TanjilG_24770		6				2
TanjilG_24802			2			2
TanjilG_24864		5				3
TanjilG_25309		5				4
TanjilG_25749			4			2
TanjilG_25870		7
TanjilG_26035		3
TanjilG_26250	1	5				5
TanjilG_26251		5				3
TanjilG_26595		6				1
TanjilG_26654					1
TanjilG_26992		7	2			2
TanjilG_27016		5				4
TanjilG_27080		7				3
TanjilG_27082		7				4
TanjilG_27346		5	5			3
TanjilG_27608			1	6		1
TanjilG_27614		6				1
TanjilG_27615		6				1
TanjilG_28054		5	3			4
TanjilG_28096		4				4
TanjilG_28530		5				1
TanjilG_28535		1				1
TanjilG_28723						1
TanjilG_28794		6				1
TanjilG_28795		5				2
TanjilG_28921		6	2			4
TanjilG_29227		6				2
TanjilG_29544		4				3
TanjilG_29643					3	1
TanjilG_29698	1			1		7
TanjilG_29741		4	4			4
TanjilG_29742		4	3			4
TanjilG_29792		5
TanjilG_30096		6				9
TanjilG_30381		6				3
TanjilG_30382		6				3
TanjilG_30383		5				2
TanjilG_30385		4				2
TanjilG_30572		2				2
TanjilG_30614		6				4
TanjilG_30917		3	4			10
TanjilG_31085		2				2
TanjilG_31609			1
TanjilG_31637				1		6
TanjilG_31983		3	3			7
TanjilG_32568		2				1
TanjilG_32958		3	1			1
TanjilG_32960	2	4				2
CC - coiled-coil domain
LRR - leucine-rich repeat domain
NBS - nucleotide-binding site domain
TIR - Toll/interleukin-1 receptor domain
TM - transmembrane domain

## Sheet: Table_S4
Resistance of narrow-leafed lupin to Diaporthe toxica is based on rapid activation of defense response genes
International Journal of Molecular Sciences
Supplementary Table S4. Overrepresented gene ontology terms identified for the sets of differentially expressed genes.
Ontology	Term ID	Term description	75A.258					Wonga			Emir
			1 DPI	5 DPI	9 DPI	16 DPI	23 DPI	1 DPI	5 DPI	9 DPI	1 DPI	5 DPI	9 DPI
biological_process	GO:0006952	defense response	2.39783	4	4	4	4	2.69875	4	4		4	4
biological_process	GO:0006950	response to stress		4	4	4	4		4	4		4	1.79585
biological_process	GO:0055114	oxidation-reduction process	4	4	2.69875	4				4			4
biological_process	GO:0017001	antibiotic catabolic process		4	4	4				4			4
biological_process	GO:0051187	cofactor catabolic process		2.69875	4	2.99957				2.99957			4
biological_process	GO:0042737	drug catabolic process		2.69875	4	2.99957				2.99957			4
biological_process	GO:0042744	hydrogen peroxide catabolic process		4	4	4				4			4
biological_process	GO:0042743	hydrogen peroxide metabolic process		4	4	4				4			4
biological_process	GO:0097659	nucleic acid-templated transcription		2.15484			1.55283	1.92078		2.52273			1.95857
biological_process	GO:0072593	reactive oxygen species metabolic process		4	4	2.99957				4			4
biological_process	GO:0009889	regulation of biosynthetic process		2.69875			2.15484	2.52273		4			4
biological_process	GO:0031326	regulation of cellular biosynthetic process		2.69875			2.15484	2.52273		4			4
biological_process	GO:2000112	regulation of cellular macromolecule biosynthetic process		2.99957			2.39783	2.99957		4			4
biological_process	GO:0031323	regulation of cellular metabolic process		1.79585			1.67776	1.67776		2.52273			1.99996
biological_process	GO:0010468	regulation of gene expression		2.22178			1.79585	2.52273		2.52273			2.09686
biological_process	GO:0010556	regulation of macromolecule biosynthetic process		2.69875			2.22178	2.69875		4			4
biological_process	GO:0060255	regulation of macromolecule metabolic process		1.37674			1.34678	1.65756		1.92078			1.45592
biological_process	GO:0051171	regulation of nitrogen compound metabolic process		2.15484			1.88602	1.92078		2.99957			2.52273
biological_process	GO:1903506	regulation of nucleic acid-templated transcription		2.99957			2.99957	4		4			4
biological_process	GO:0019219	regulation of nucleobase-containing compound metabolic process		2.69875			2.52273	2.69875		4			4
biological_process	GO:0080090	regulation of primary metabolic process		2.04571			1.79585	1.82388		2.99957			2.04571
biological_process	GO:2001141	regulation of RNA biosynthetic process		2.99957			2.99957	4		4			4
biological_process	GO:0051252	regulation of RNA metabolic process		2.69875			2.99957	2.99957		4			4
biological_process	GO:0006355	regulation of transcription, DNA-templated		2.99957			2.99957	4		4			4
biological_process	GO:0006979	response to oxidative stress		1.7447	2.99957	2.69875				2.99957			1.69895
biological_process	GO:0032774	RNA biosynthetic process		2.15484			1.55283	1.92078		2.52273			1.88602
biological_process	GO:0006351	transcription, DNA-templated		2.22178			1.61977	1.95857		2.52273			1.92078
biological_process	GO:0016999	antibiotic metabolic process			2.69875	2.39783				1.82388			1.95857
biological_process	GO:0031408	oxylipin biosynthetic process	4					4
biological_process	GO:0031407	oxylipin metabolic process	4					4
biological_process	GO:0019222	regulation of metabolic process						1.43179		1.50862
biological_process	GO:0042493	response to drug								2.15484			2.69875
biological_process	GO:0050896	response to stimulus							1.76953	1.46851
biological_process	GO:0008037	cell recognition								4
biological_process	GO:0071554	cell wall organization or biogenesis											2.99957
biological_process	GO:0006879	cellular iron ion homeostasis											4
biological_process	GO:0046916	cellular transition metal ion homeostasis											1.85384
biological_process	GO:0022900	electron transport chain		1.79585
biological_process	GO:0006633	fatty acid biosynthetic process								2.22178
biological_process	GO:0006631	fatty acid metabolic process								2.09686
biological_process	GO:0055072	iron ion homeostasis											2.69875
biological_process	GO:0006826	iron ion transport											1.85384
biological_process	GO:0010876	lipid localization					2.39783
biological_process	GO:0006869	lipid transport					2.52273
biological_process	GO:0044706	multi-multicellular organism process								1.58501
biological_process	GO:0009875	pollen-pistil interaction								4
biological_process	GO:0009856	pollination								1.58501
biological_process	GO:0048544	recognition of pollen								4
biological_process	GO:0009611	response to wounding							2.52273
biological_process	GO:0008272	sulfate transport								4
biological_process	GO:0072348	sulfur compound transport								2.99957
biological_process	GO:0009627	systemic acquired resistance											1.79585
biological_process	GO:0010411	xyloglucan metabolic process									1.76953
cellular_component	GO:0016021	integral component of membrane				1.55283	2.04571		4	4		1.58501	2.99957
cellular_component	GO:0031224	intrinsic component of membrane				1.46851	2.04571		4	4		1.55283	2.99957
cellular_component	GO:0005576	extracellular region	1.37674	4		4				1.67776			4
cellular_component	GO:0048046	apoplast					4				2.04571		2.99957
cellular_component	GO:0016020	membrane							4	4			2.30094
cellular_component	GO:0044425	membrane part							4	2.39783			1.52286
cellular_component	GO:0005618	cell wall											2.99957
cellular_component	GO:0030312	external encapsulating structure											2.99957
molecular_function	GO:0020037	heme binding	2.30094	4	4	4	1.33723		2.09686	4			4
molecular_function	GO:0043565	sequence-specific DNA binding		1.36652		4	4	4	4	4		2.52273	4
molecular_function	GO:0008061	chitin binding		4	2.69875		1.53759		4	1.50862		4	1.39793
molecular_function	GO:0003700	DNA-binding transcription factor activity		4		4	4	4	4	4			4
molecular_function	GO:0016491	oxidoreductase activity	4	4	4	4			2.15484	4			4
molecular_function	GO:0046906	tetrapyrrole binding	2.15484	4	4	4			1.56862	4			4
molecular_function	GO:0140110	transcription regulator activity		4		2.99957	4	4	4	4			4
molecular_function	GO:0004866	endopeptidase inhibitor activity	2.99957	2.69875		2.99957	2.09686		2.99957	2.30094
molecular_function	GO:0061135	endopeptidase regulator activity	2.99957	2.69875		2.99957	2.09686		2.99957	2.30094
molecular_function	GO:0030414	peptidase inhibitor activity	2.99957	2.69875		2.99957	2.09686		2.99957	2.30094
molecular_function	GO:0061134	peptidase regulator activity	2.99957	2.39783		2.99957	1.85384		2.39783	1.88602
molecular_function	GO:0004867	serine-type endopeptidase inhibitor activity		2.99957		2.99957	2.69875		2.99957	1.43179			1.32789
molecular_function	GO:0016209	antioxidant activity		4	2.69875	2.99957				4			4
molecular_function	GO:0048037	cofactor binding		1.36652	1.56862	4				4			2.99957
molecular_function	GO:0003677	DNA binding		2.52273			4	2.69875		4			4
molecular_function	GO:0009055	electron transfer activity		1.58501	2.99957	1.50862	1.7447		2.99957
molecular_function	GO:0016684	oxidoreductase activity, acting on peroxide as acceptor		4	2.99957	4				4			4
molecular_function	GO:0004601	peroxidase activity		4	2.99957	4				4			4
molecular_function	GO:0003824	catalytic activity				1.55283				4	1.69895		4
molecular_function	GO:0051213	dioxygenase activity	4					1.72122		2.69875
molecular_function	GO:0005506	iron ion binding				2.69875				4			2.69875
molecular_function	GO:0016702	oxidoreductase activity, acting on single donors with incorporation of molecular oxygen, incorporation of two atoms of oxygen	4					1.88602		2.99957
molecular_function	GO:0016746	transferase activity, transferring acyl groups					1.44369			4			1.92078
molecular_function	GO:0016747	transferase activity, transferring acyl groups other than amino-acyl groups					2.69875			4			2.15484
molecular_function	GO:0016705	oxidoreductase activity, acting on paired donors, with incorporation or reduction of molecular oxygen				2.15484							1.39793
molecular_function	GO:0016701	oxidoreductase activity, acting on single donors with incorporation of molecular oxygen	2.99957							4
molecular_function	GO:0005199	structural constituent of cell wall								1.40892			2.15484
molecular_function	GO:0016758	transferase activity, transferring hexosyl groups		1.40892							1.63825
molecular_function	GO:0016762	xyloglucan:xyloglucosyl transferase activity									1.88602		1.88602
molecular_function	GO:0022804	active transmembrane transporter activity								1.65756
molecular_function	GO:0004097	catechol oxidase activity				1.92078
molecular_function	GO:0004857	enzyme inhibitor activity	1.33723
molecular_function	GO:0008199	ferric iron binding											2.69875
molecular_function	GO:0004322	ferroxidase activity											1.32789
molecular_function	GO:0008171	O-methyltransferase activity										2.99957
molecular_function	GO:0016722	oxidoreductase activity, oxidizing metal ions											1.32789
molecular_function	GO:0016724	oxidoreductase activity, oxidizing metal ions, oxygen as acceptor											1.32789
molecular_function	GO:0004672	protein kinase activity											1.31875
molecular_function	GO:0008271	secondary active sulfate transmembrane transporter activity								4
molecular_function	GO:0015291	secondary active transmembrane transporter activity								4
molecular_function	GO:0015116	sulfate transmembrane transporter activity								4
molecular_function	GO:1901682	sulfur compound transmembrane transporter activity								4
molecular_function	GO:0016740	transferase activity											1.88602
molecular_function	GO:0005215	transporter activity								4
DPI - days post inoculation

## Sheet: Table_S5
Resistance of narrow-leafed lupin to Diaporthe toxica is based on rapid activation of defense response genes
International Journal of Molecular Sciences
Supplementary Table S5. Results of weighted gene co-expression network analysis.
Line	Variant	DPI	1	2	3	4	5	6	7	8	9	10	11	12	13	14	15	16	17	18	19	20	21	22	23	24	25	26	27	28	29	30	31	32	33	34	35	36	37	38	39	40	41
Emir	Inoculated	1	-0.219437	-0.0483851	-0.344337	-0.303111	-0.339193	0.150072	-0.141291	-0.246337	-0.194419	0.256361	-0.0960006	0.166583	0.345675	-0.235751	-0.293172	-0.232108	-0.313774	0.363926	0.37069	-0.263965	-0.213903	0.188432	-0.0264396	-0.231788	-0.20621	0.328863	-0.239263	-0.113007	-0.21081	-0.198732	-0.215812	-0.167724	-0.33354	0.29818	-0.253619	-0.221954	-0.274767	-0.114997	-0.227165	-0.134635	-0.260436
Emir	Inoculated	5	-0.140076	-0.0173083	-0.316811	-0.231396	-0.331561	0.164699	-0.110379	-0.148703	-0.0376689	0.195128	-0.193869	0.168095	0.165312	-0.116647	-0.204311	-0.158994	-0.256446	0.0846636	-0.00325295	-0.208376	-0.120508	0.469402	-0.164436	-0.174424	-0.132457	-0.149513	-0.187802	-0.0853344	-0.177326	-0.124037	-0.0714374	-0.188315	-0.30094	0.332038	-0.193059	-0.102956	-0.151959	0.00710492	-0.197872	-0.132659	-0.239126
Emir	Inoculated	9	-0.0948559	0.85336	-0.311448	-0.254695	-0.321651	-0.187328	-0.0364047	-0.257698	-0.041948	-0.179814	0.0276762	0.176159	-0.0151476	-0.159831	-0.101106	-0.0486766	-0.197926	0.138425	0.0902294	-0.225995	-0.100016	0.213822	-0.148147	-0.18877	-0.0185572	-0.0922906	-0.186507	-0.0876774	-0.0643036	-0.0678787	-0.0169288	-0.0927639	-0.31235	0.0973014	-0.199183	-0.0937849	-0.105684	0.682782	-0.222003	-0.134301	-0.222797
Emir	Control	1	-0.0657892	-0.100048	-0.321327	-0.264272	-0.338238	0.112185	0.0542713	-0.155279	-0.101291	0.120848	0.0342134	0.179677	0.197505	-0.143404	-0.198383	-0.0938609	-0.220529	0.262409	0.236227	-0.233819	-0.152354	0.349691	-0.0571458	-0.160165	-0.192257	0.106588	-0.213045	-0.0994651	-0.0241688	-0.128185	-0.140532	-0.137818	-0.285764	0.3546	-0.211703	-0.0648563	-0.194122	-0.131646	-0.215888	-0.122198	-0.223449
Emir	Control	5	-0.0965072	-0.123863	-0.284707	-0.176459	-0.322554	0.411857	-0.14367	-0.0529557	0.00722605	0.304647	-0.0577053	0.144257	0.13257	-0.0772996	-0.172698	-0.105701	-0.2135	-0.0434217	-0.192383	-0.13957	-0.0921692	0.104756	-0.209491	-0.129639	-0.100113	-0.240696	-0.138162	-0.0783129	-0.159297	-0.0861327	-0.0439573	-0.144048	-0.256315	0.0820717	-0.159471	-0.0606744	-0.0992098	-0.16966	-0.185778	-0.128211	-0.161108
Emir	Control	9	0.0974617	-0.110828	-0.251782	-0.137538	-0.293572	0.310065	-0.0353069	0.0978787	0.148299	0.211375	-0.0696973	0.279681	0.26419	0.125481	-0.105014	0.0899225	-0.148497	0.224815	0.187313	0.119586	0.00516098	0.0298654	-0.0481143	-0.0439403	0.0798291	0.126461	0.0283728	-0.0654854	0.0261172	-0.138129	0.0890774	0.215234	-0.220483	0.0792941	-0.102485	-0.0269791	0.0244866	-0.143766	-0.15958	-0.0874122	-0.00785279
Wonga	Inoculated	1	-0.255186	0.0047962	-0.0743284	-0.189752	0.0969988	-0.00830167	-0.120964	-0.245279	-0.25741	-0.0468958	0.12691	0.119103	0.140841	-0.261302	-0.233739	-0.254413	-0.178153	0.349937	0.371227	-0.295245	-0.225192	0.147501	0.434624	-0.251203	-0.23038	0.31683	-0.229469	-0.0975061	-0.240206	-0.178981	-0.27298	-0.232159	-0.0371396	0.193472	-0.216808	-0.253437	-0.274448	0.0249611	-0.201882	0.247493	-0.179646
Wonga	Inoculated	5	-0.140571	-0.0280549	0.0209695	-0.0865031	0.117729	-0.0461345	-0.109683	-0.152968	-0.327675	0.0582071	0.871249	0.173239	-0.117796	-0.153893	-0.0865845	-0.0431167	-0.0500923	0.0906155	-0.107445	0.00973615	-0.152174	-0.0165239	0.133899	-0.176233	-0.337892	-0.237305	-0.212004	-0.0790037	-0.0312242	-0.0569176	-0.272231	-0.172509	0.0729037	-0.0606878	-0.156258	-0.147145	-0.203678	-0.00947342	-0.166717	0.32976	-0.061315
Wonga	Inoculated	9	-0.0401878	0.357021	0.0551751	-0.0683309	0.177733	-0.185037	-0.0700281	-0.177752	-0.0595691	-0.212999	-0.0564841	0.204419	-0.0548814	-0.0450588	0.0389748	0.0417644	0.0420059	0.166406	0.101023	-0.0981311	-0.0768718	-0.128434	0.337083	-0.154534	0.0256509	0.00677837	-0.0752335	-0.0632116	0.0646138	-0.0617775	0.00713263	-0.0442791	0.0924314	-0.0987019	-0.14095	-0.0995139	-0.0484917	0.349175	-0.166622	0.338208	0.00467319
Wonga	Control	1	-0.155145	-0.109389	-0.0625392	-0.160908	0.0498303	-0.180748	-0.143595	-0.176394	-0.215201	-0.111813	-0.167089	0.0999708	0.0200079	-0.23336	-0.183101	-0.178128	-0.073624	0.141408	0.119715	-0.303345	-0.202505	0.0882982	0.343599	-0.215085	-0.220614	0.100435	-0.234466	-0.0890982	-0.0683541	-0.117575	-0.240922	-0.251157	0.00780092	0.131223	-0.236368	-0.139567	-0.232793	-0.173041	-0.207727	0.225139	-0.168153
Wonga	Control	5	-0.0859491	-0.116244	0.082946	0.059981	0.19769	0.353341	-0.115631	0.0725404	0.0352513	0.378812	-0.0233572	0.218856	0.23182	0.0991506	-0.0660487	-0.0023726	0.017269	0.000748622	-0.148556	-0.00092659	-0.0485882	0.0664264	0.182189	-0.119428	0.017016	-0.180341	0.0133757	-0.0476865	-0.0991693	-0.0498046	0.0914197	-0.102077	0.158716	0.0930326	-0.114625	-0.0690431	-0.00799318	-0.173047	-0.132386	0.37014	0.13068
Wonga	Control	9	0.0907108	-0.109208	0.192832	0.149022	0.336508	0.238775	-0.0330249	0.20164	0.21337	0.239574	-0.0318794	0.33389	0.365562	0.363805	0.0397127	0.177333	0.128649	0.238092	0.191394	0.192522	0.058747	0.017442	0.464995	-0.0233235	0.199534	0.144793	0.186625	-0.0270782	0.0752362	-0.0590573	0.229847	0.178793	0.306224	0.139015	-0.02404	0.00907552	0.116239	-0.136155	-0.106531	0.503441	0.297301
75A:258	Inoculated	1	-0.210798	0.00606584	-0.0337926	-0.12713	-0.0361515	-0.425259	-0.143432	-0.247439	-0.32726	-0.319506	-0.101222	-0.289846	-0.323976	-0.336082	-0.108435	-0.307742	-0.118155	-0.156598	-0.0387696	-0.158502	-0.161046	-0.199339	-0.140864	-0.0531888	-0.28258	0.0573195	-0.224999	-0.0721518	-0.163868	-0.0118134	-0.359017	-0.238972	-0.143804	-0.203739	0.0211203	-0.103973	-0.218329	-0.0486188	0.0281703	-0.197019	-0.248318
75A:258	Inoculated	5	-0.236015	0.0785597	0.016184	-0.0623083	0.0611662	-0.113431	-0.0679463	-0.175767	-0.200653	-0.0688159	-0.0187232	-0.260624	-0.108301	-0.157362	-0.0798622	-0.203276	-0.11831	-0.225989	-0.162277	-0.121127	-0.111794	0.212194	-0.197851	-0.0739087	-0.153865	-0.129153	-0.0958666	-0.0773472	-0.25461	-0.111585	-0.127317	-0.179289	-0.0463057	0.0836366	0.0080025	-0.177943	-0.122932	0.174296	0.106459	-0.164189	-0.11458
75A:258	Inoculated	9	0.214504	0.0123952	0.30569	0.229896	0.255751	0.00230936	-0.0756462	0.239026	0.251903	0.0896363	-0.0757513	-0.157395	0.0677907	0.387733	0.208968	0.337884	0.258007	-0.107252	0.0199746	0.367806	0.0971495	-0.127547	-0.03204	0.291619	0.373056	0.0412993	0.406517	-0.0348923	0.246934	-0.0341966	0.409763	0.31542	0.296982	-0.0354991	0.21947	0.0304602	0.286594	0.0208197	0.367354	-0.0404406	0.438252
75A:258	Inoculated	16	0.421914	-0.0354782	0.229821	0.24327	0.0954014	-0.021279	0.623241	0.273383	0.154404	-0.22176	0.135094	-0.216622	-0.334919	0.191127	0.353084	0.473189	0.430129	-0.267061	-0.265499	0.252147	0.165488	-0.377441	-0.144957	0.408275	0.21746	-0.174392	0.273559	-0.0282642	0.580448	0.181346	0.234794	0.384898	0.277239	-0.373532	0.213997	0.292803	0.294809	0.0849773	0.287441	-0.110528	0.284313
75A:258	Inoculated	23	0.178074	0.0204286	0.152755	0.266961	0.0193179	-0.320366	0.116423	0.0732806	0.193555	-0.382759	-0.101407	-0.253878	-0.400216	-0.0317281	0.394712	-0.0108151	0.174622	-0.311893	-0.305459	0.195906	0.524423	-0.311102	-0.204047	0.188575	0.0681302	-0.177685	0.0591471	0.818666	0.0410125	0.647007	-0.0415455	0.109732	-0.02375	-0.400397	0.394119	0.366609	0.232168	0.365856	0.142707	-0.176301	-0.0891246
75A:258	Control	1	-0.111677	-0.0913665	0.107464	0.0353764	0.0798595	-0.148962	-0.125295	-0.0246579	-0.0893114	-0.0328608	-0.0544038	-0.231438	-0.0939697	-0.0258868	-0.0380219	-0.139895	-0.0312624	-0.0045537	0.332303	0.030976	-0.0431075	-0.202752	0.0341262	0.0336611	0.0528251	0.611293	0.109668	-0.0195423	-0.130677	-0.0615023	-0.0687701	-0.0244933	-0.00634393	-0.132787	0.105672	-0.0816264	-0.00376988	-0.143216	0.155163	-0.135513	0.037249
75A:258	Control	5	-0.187944	-0.124649	0.0913328	0.0572973	0.0747775	0.150619	-0.120922	0.0196035	-0.137649	0.200418	0.193449	-0.249069	0.0105107	-0.0334443	-0.0942354	-0.155448	-0.0780013	-0.241508	-0.237793	0.0963489	-0.0670332	0.0589746	-0.213785	0.0372244	-0.130317	-0.200157	0.0389152	-0.0698664	-0.240872	-0.105588	-0.0739817	-0.141752	0.0459758	0.105071	0.106513	-0.145916	-0.0531597	-0.166159	0.234703	-0.142418	0.031929
75A:258	Control	9	0.258437	-0.0935243	0.269491	0.302349	0.204436	0.0360454	0.288057	0.35669	0.277127	-0.0495659	-0.107184	-0.184433	-0.0611843	0.35	0.206943	0.317935	0.257357	-0.172956	-0.0467159	0.326851	0.156475	-0.141775	-0.0647619	0.327396	0.339168	0.0594707	0.403252	-0.0298549	0.202488	-0.00850996	0.377258	0.342834	0.303111	-0.10561	0.225078	0.126966	0.324631	-0.0916548	0.340938	-0.0819369	0.374347
75A:258	Control	16	0.389349	-0.113017	0.203752	0.279362	0.0955494	-0.146552	0.570398	0.371549	0.23336	-0.241492	-0.19157	-0.21812	-0.25249	0.229884	0.25516	0.339359	0.361315	-0.251306	-0.22668	0.121763	0.154506	-0.293918	-0.124488	0.345144	0.320884	-0.116372	0.278323	-0.0340113	0.367653	0.21224	0.257046	0.305029	0.25633	-0.295553	0.218005	0.357477	0.295081	-0.113622	0.280784	-0.114141	0.260381
75A:258	Control	23	0.389689	-0.111262	0.272661	0.43889	0.120172	-0.146569	-0.0591721	0.355637	0.47556	-0.186727	-0.0422486	-0.202504	-0.178905	0.263869	0.467156	0.15716	0.328918	-0.278908	-0.285266	0.335358	0.605313	-0.147973	-0.153948	0.363735	0.311689	-0.20223	0.239064	0.480131	0.260382	0.55981	0.249094	0.265417	0.149022	-0.282427	0.496593	0.605978	0.417328	-0.0949176	0.246431	-0.112278	0.116781
DPI - days post inoculation
1-41 - modules identified by weighted gene co-expression network analysis

## Sheet: Table_S6
Resistance of narrow-leafed lupin to Diaporthe toxica is based on rapid activation of defense response genes
International Journal of Molecular Sciences
Supplementary Table S6. Overrepresented gene ontology terms in modules identified by weighted gene co-expression network analysis.
Ontology	Term ID	Term description	1	2	6	8	10	11	12	13	14	15	16	18	19	21	22	23	25	26	27	28	29	30	31	34	37	40	41
biological_process	GO:0006397	mRNA processing	1.88602
biological_process	GO:0055114	oxidation-reduction process		>3				1.92078			>3
biological_process	GO:0042737	drug catabolic process		1.95857
biological_process	GO:0009611	response to wounding		1.31875
biological_process	GO:0016051	carbohydrate biosynthetic process			>3
biological_process	GO:0071554	cell wall organization or biogenesis			>3
biological_process	GO:0033692	cellular polysaccharide biosynthetic process			>3
biological_process	GO:0000271	polysaccharide biosynthetic process			>3
biological_process	GO:0005976	polysaccharide metabolic process			2.99957
biological_process	GO:0045492	xylan biosynthetic process			2.99957
biological_process	GO:0045491	xylan metabolic process			2.99957
biological_process	GO:0044038	cell wall macromolecule biosynthetic process			2.69875
biological_process	GO:0070592	cell wall polysaccharide biosynthetic process			2.69875
biological_process	GO:0070589	cellular component macromolecule biosynthetic process			2.69875
biological_process	GO:0006555	methionine metabolic process			2.52273
biological_process	GO:0035999	tetrahydrofolate interconversion			2.52273
biological_process	GO:0042546	cell wall biogenesis			2.39783
biological_process	GO:0034637	cellular carbohydrate biosynthetic process			2.39783
biological_process	GO:0046653	tetrahydrofolate metabolic process			2.39783
biological_process	GO:0044264	cellular polysaccharide metabolic process			1.99996
biological_process	GO:0006730	one-carbon metabolic process			1.95857
biological_process	GO:0006760	folic acid-containing compound metabolic process			1.69895
biological_process	GO:0006790	sulfur compound metabolic process			1.69895
biological_process	GO:0042558	pteridine-containing compound metabolic process			1.58501
biological_process	GO:0044272	sulfur compound biosynthetic process			1.48147
biological_process	GO:0005975	carbohydrate metabolic process			1.35654						1.76953
biological_process	GO:0009066	aspartate family amino acid metabolic process			1.31875
biological_process	GO:0007017	microtubule-based process					>3										>3									>3
biological_process	GO:0007010	cytoskeleton organization					>3
biological_process	GO:0009772	photosynthetic electron transport in photosystem II						>3
biological_process	GO:0022900	electron transport chain						2.99957
biological_process	GO:0009767	photosynthetic electron transport chain						2.52273
biological_process	GO:0006091	generation of precursor metabolites and energy						2.04571			1.53759
biological_process	GO:0019684	photosynthesis, light reaction						1.72122
biological_process	GO:0042886	amide transport								>3
biological_process	GO:0051641	cellular localization								>3
biological_process	GO:0070727	cellular macromolecule localization								>3
biological_process	GO:0034613	cellular protein localization								>3
biological_process	GO:0051234	establishment of localization								>3
biological_process	GO:0051649	establishment of localization in cell								>3
biological_process	GO:0045184	establishment of protein localization								>3
biological_process	GO:0006886	intracellular protein transport								>3
biological_process	GO:0046907	intracellular transport								>3
biological_process	GO:0051179	localization								>3
biological_process	GO:0033036	macromolecule localization								>3
biological_process	GO:0071705	nitrogen compound transport								>3
biological_process	GO:0071702	organic substance transport								>3
biological_process	GO:0015833	peptide transport								>3
biological_process	GO:0008104	protein localization								>3
biological_process	GO:0015031	protein transport								>3
biological_process	GO:0006890	retrograde vesicle-mediated transport, Golgi to ER								>3
biological_process	GO:0006810	transport								>3
biological_process	GO:0016192	vesicle-mediated transport								>3
biological_process	GO:0048193	Golgi vesicle transport								1.32789
biological_process	GO:0055085	transmembrane transport									>3
biological_process	GO:0015979	photosynthesis									1.56862
biological_process	GO:0044281	small molecule metabolic process									1.52286
biological_process	GO:0006082	organic acid metabolic process									1.40892
biological_process	GO:0043436	oxoacid metabolic process									1.40892
biological_process	GO:0009888	tissue development											1.53759
biological_process	GO:1901566	organonitrogen compound biosynthetic process												>3	>3			2.04571
biological_process	GO:0006412	translation												>3	>3			1.4202
biological_process	GO:0043043	peptide biosynthetic process												>3	>3			1.40892
biological_process	GO:0006518	peptide metabolic process												>3	>3			1.34678
biological_process	GO:0043604	amide biosynthetic process												>3	>3			1.32789
biological_process	GO:0010467	gene expression												>3	>3					>3							2.99957
biological_process	GO:0034641	cellular nitrogen compound metabolic process												>3	>3					2.22178							2.22178
biological_process	GO:0044260	cellular macromolecule metabolic process												>3	>3												>3
biological_process	GO:0043170	macromolecule metabolic process												>3	>3												>3
biological_process	GO:0006807	nitrogen compound metabolic process												>3	>3												>3
biological_process	GO:0044237	cellular metabolic process												>3	>3												2.99957
biological_process	GO:0044238	primary metabolic process												>3	>3												2.52273
biological_process	GO:0071704	organic substance metabolic process												>3	>3												2.04571
biological_process	GO:0009058	biosynthetic process												>3	>3
biological_process	GO:0043603	cellular amide metabolic process												>3	>3
biological_process	GO:0044249	cellular biosynthetic process												>3	>3
biological_process	GO:0034645	cellular macromolecule biosynthetic process												>3	>3
biological_process	GO:0044271	cellular nitrogen compound biosynthetic process												>3	>3
biological_process	GO:0044267	cellular protein metabolic process												>3	>3
biological_process	GO:0009059	macromolecule biosynthetic process												>3	>3
biological_process	GO:1901576	organic substance biosynthetic process												>3	>3
biological_process	GO:1901564	organonitrogen compound metabolic process												>3	>3
biological_process	GO:0019538	protein metabolic process												>3	>3
biological_process	GO:0009987	cellular process												2.99957	>3												2.99957
biological_process	GO:0008152	metabolic process												1.95857	1.58501
biological_process	GO:0042254	ribosome biogenesis													2.99957			2.04571		>3
biological_process	GO:0022613	ribonucleoprotein complex biogenesis													1.61977			1.45592		>3
biological_process	GO:0043632	modification-dependent macromolecule catabolic process														1.45592
biological_process	GO:0019941	modification-dependent protein catabolic process														1.45592
biological_process	GO:0006511	ubiquitin-dependent protein catabolic process														1.45592
biological_process	GO:0007018	microtubule-based movement															>3									>3
biological_process	GO:0006928	movement of cell or subcellular component															>3									>3
biological_process	GO:0032147	activation of protein kinase activity															>3
biological_process	GO:0007049	cell cycle															>3
biological_process	GO:1902850	microtubule cytoskeleton organization involved in mitosis															>3
biological_process	GO:0000278	mitotic cell cycle															>3
biological_process	GO:1903047	mitotic cell cycle process															>3
biological_process	GO:0007052	mitotic spindle organization															>3
biological_process	GO:0033674	positive regulation of kinase activity															>3
biological_process	GO:0045937	positive regulation of phosphate metabolic process															>3
biological_process	GO:0010562	positive regulation of phosphorus metabolic process															>3
biological_process	GO:0042327	positive regulation of phosphorylation															>3
biological_process	GO:0045860	positive regulation of protein kinase activity															>3
biological_process	GO:0001934	positive regulation of protein phosphorylation															>3
biological_process	GO:0051726	regulation of cell cycle															>3
biological_process	GO:0010564	regulation of cell cycle process															>3
biological_process	GO:0051128	regulation of cellular component organization															>3
biological_process	GO:0070507	regulation of microtubule cytoskeleton organization															>3
biological_process	GO:0032886	regulation of microtubule-based process															>3
biological_process	GO:0007346	regulation of mitotic cell cycle															>3
biological_process	GO:0060236	regulation of mitotic spindle organization															>3
biological_process	GO:0033043	regulation of organelle organization															>3
biological_process	GO:0090224	regulation of spindle organization															>3
biological_process	GO:0022402	cell cycle process															2.52273
biological_process	GO:0031401	positive regulation of protein modification process															2.52273
biological_process	GO:0051347	positive regulation of transferase activity															2.52273
biological_process	GO:0043549	regulation of kinase activity															2.52273
biological_process	GO:0042325	regulation of phosphorylation															2.52273
biological_process	GO:0045859	regulation of protein kinase activity															2.52273
biological_process	GO:0001932	regulation of protein phosphorylation															2.52273
biological_process	GO:0007051	spindle organization															2.52273
biological_process	GO:0051493	regulation of cytoskeleton organization															2.39783
biological_process	GO:0032270	positive regulation of cellular protein metabolic process															2.30094
biological_process	GO:0051247	positive regulation of protein metabolic process															2.09686
biological_process	GO:0051338	regulation of transferase activity															2.09686
biological_process	GO:0019220	regulation of phosphate metabolic process															1.7447
biological_process	GO:0051174	regulation of phosphorus metabolic process															1.7447
biological_process	GO:0007094	mitotic spindle assembly checkpoint															1.69895
biological_process	GO:0071174	mitotic spindle checkpoint															1.69895
biological_process	GO:0051985	negative regulation of chromosome segregation															1.69895
biological_process	GO:1905819	negative regulation of chromosome separation															1.69895
biological_process	GO:1902100	negative regulation of metaphase/anaphase transition of cell cycle															1.69895
biological_process	GO:0045841	negative regulation of mitotic metaphase/anaphase transition															1.69895
biological_process	GO:0045839	negative regulation of mitotic nuclear division															1.69895
biological_process	GO:0033048	negative regulation of mitotic sister chromatid segregation															1.69895
biological_process	GO:2000816	negative regulation of mitotic sister chromatid separation															1.69895
biological_process	GO:0051784	negative regulation of nuclear division															1.69895
biological_process	GO:0033046	negative regulation of sister chromatid segregation															1.69895
biological_process	GO:0071173	spindle assembly checkpoint															1.69895
biological_process	GO:0031577	spindle checkpoint															1.69895
biological_process	GO:0044784	metaphase/anaphase transition of cell cycle															1.45592
biological_process	GO:0007091	metaphase/anaphase transition of mitotic cell cycle															1.45592
biological_process	GO:0007093	mitotic cell cycle checkpoint															1.45592
biological_process	GO:0051306	mitotic sister chromatid separation															1.45592
biological_process	GO:1901988	negative regulation of cell cycle phase transition															1.45592
biological_process	GO:0010948	negative regulation of cell cycle process															1.45592
biological_process	GO:0045930	negative regulation of mitotic cell cycle															1.45592
biological_process	GO:1901991	negative regulation of mitotic cell cycle phase transition															1.45592
biological_process	GO:0051983	regulation of chromosome segregation															1.45592
biological_process	GO:1905818	regulation of chromosome separation															1.45592
biological_process	GO:1902099	regulation of metaphase/anaphase transition of cell cycle															1.45592
biological_process	GO:0030071	regulation of mitotic metaphase/anaphase transition															1.45592
biological_process	GO:0033047	regulation of mitotic sister chromatid segregation															1.45592
biological_process	GO:0010965	regulation of mitotic sister chromatid separation															1.45592
biological_process	GO:0033045	regulation of sister chromatid segregation															1.45592
biological_process	GO:0031399	regulation of protein modification process															1.43179
biological_process	GO:0043085	positive regulation of catalytic activity															1.4202
biological_process	GO:0051304	chromosome separation															1.36652
biological_process	GO:2001251	negative regulation of chromosome organization															1.36652
biological_process	GO:0007088	regulation of mitotic nuclear division															1.36652
biological_process	GO:0000226	microtubule cytoskeleton organization															1.34678
biological_process	GO:0044093	positive regulation of molecular function															1.31875
biological_process	GO:0044265	cellular macromolecule catabolic process																	2.99957
biological_process	GO:0000184	nuclear-transcribed mRNA catabolic process, nonsense-mediated decay																	2.99957
biological_process	GO:0040034	regulation of development, heterochronic																	2.99957
biological_process	GO:0048506	regulation of timing of meristematic phase transition																	2.99957
biological_process	GO:0048510	regulation of timing of transition from vegetative to reproductive phase																	2.99957
biological_process	GO:0010605	negative regulation of macromolecule metabolic process																	2.39783
biological_process	GO:0009892	negative regulation of metabolic process																	2.30094
biological_process	GO:0048509	regulation of meristem development																	1.99996
biological_process	GO:0010629	negative regulation of gene expression																	1.92078
biological_process	GO:0048608	reproductive structure development																	1.76953
biological_process	GO:0061458	reproductive system development																	1.76953
biological_process	GO:0071596	ubiquitin-dependent protein catabolic process via the N-end rule pathway																	1.56862
biological_process	GO:0048731	system development																	1.50862
biological_process	GO:0009057	macromolecule catabolic process																	1.49484
biological_process	GO:0048571	long-day photoperiodism																	1.45592
biological_process	GO:0048574	long-day photoperiodism, flowering																	1.45592
biological_process	GO:0000956	nuclear-transcribed mRNA catabolic process																	1.40892								1.88602
biological_process	GO:0090304	nucleic acid metabolic process																	1.3098								>3
biological_process	GO:0044085	cellular component biogenesis																		>3
biological_process	GO:0034660	ncRNA metabolic process																		>3
biological_process	GO:0034470	ncRNA processing																		>3
biological_process	GO:0006396	RNA processing																		>3
biological_process	GO:0016072	rRNA metabolic process																		>3
biological_process	GO:0006364	rRNA processing																		>3
biological_process	GO:0071840	cellular component organization or biogenesis																		2.30094							2.99957
biological_process	GO:0016070	RNA metabolic process																		1.48147							>3
biological_process	GO:0006457	protein folding																				>3
biological_process	GO:0042026	protein refolding																				>3
biological_process	GO:0009628	response to abiotic stimulus																				>3
biological_process	GO:0009408	response to heat																				>3
biological_process	GO:0000302	response to reactive oxygen species																				>3
biological_process	GO:0006950	response to stress																				>3
biological_process	GO:0009266	response to temperature stimulus																				>3
biological_process	GO:0006979	response to oxidative stress																				2.99957
biological_process	GO:1900409	positive regulation of cellular response to oxidative stress																				2.69875
biological_process	GO:1904833	positive regulation of removal of superoxide radicals																				2.69875
biological_process	GO:1902884	positive regulation of response to oxidative stress																				2.69875
biological_process	GO:1901033	positive regulation of response to reactive oxygen species																				2.69875
biological_process	GO:1901671	positive regulation of superoxide dismutase activity																				2.69875
biological_process	GO:1900407	regulation of cellular response to oxidative stress																				2.69875
biological_process	GO:2000121	regulation of removal of superoxide radicals																				2.69875
biological_process	GO:1902882	regulation of response to oxidative stress																				2.69875
biological_process	GO:1901031	regulation of response to reactive oxygen species																				2.69875
biological_process	GO:1901668	regulation of superoxide dismutase activity																				2.69875
biological_process	GO:0051353	positive regulation of oxidoreductase activity																				2.15484
biological_process	GO:2000379	positive regulation of reactive oxygen species metabolic process																				2.15484
biological_process	GO:0090322	regulation of superoxide metabolic process																				1.99996
biological_process	GO:0009636	response to toxic substance																				1.95857
biological_process	GO:0050896	response to stimulus																				1.92078
biological_process	GO:0051341	regulation of oxidoreductase activity																				1.88602
biological_process	GO:2000377	regulation of reactive oxygen species metabolic process																				1.79585
biological_process	GO:0050794	regulation of cellular process																						1.7447			2.99957
biological_process	GO:0007076	mitotic chromosome condensation																								1.92078
biological_process	GO:0030261	chromosome condensation																								1.48147
biological_process	GO:0065007	biological regulation																									>3
biological_process	GO:0006725	cellular aromatic compound metabolic process																									>3
biological_process	GO:0016043	cellular component organization																									>3
biological_process	GO:0006325	chromatin organization																									>3
biological_process	GO:0051276	chromosome organization																									>3
biological_process	GO:0016569	covalent chromatin modification																									>3
biological_process	GO:0046483	heterocycle metabolic process																									>3
biological_process	GO:0016570	histone modification																									>3
biological_process	GO:0097659	nucleic acid-templated transcription																									>3
biological_process	GO:0034654	nucleobase-containing compound biosynthetic process																									>3
biological_process	GO:0006139	nucleobase-containing compound metabolic process																									>3
biological_process	GO:0006996	organelle organization																									>3
biological_process	GO:1901360	organic cyclic compound metabolic process																									>3
biological_process	GO:0018205	peptidyl-lysine modification																									>3
biological_process	GO:0050789	regulation of biological process																									>3
biological_process	GO:0009889	regulation of biosynthetic process																									>3
biological_process	GO:0031326	regulation of cellular biosynthetic process																									>3
biological_process	GO:0031323	regulation of cellular metabolic process																									>3
biological_process	GO:0010468	regulation of gene expression																									>3
biological_process	GO:0060255	regulation of macromolecule metabolic process																									>3
biological_process	GO:0019222	regulation of metabolic process																									>3
biological_process	GO:0080090	regulation of primary metabolic process																									>3
biological_process	GO:0032774	RNA biosynthetic process																									>3
biological_process	GO:0006351	transcription, DNA-templated																									>3
biological_process	GO:0019438	aromatic compound biosynthetic process																									2.99957
biological_process	GO:0018130	heterocycle biosynthetic process																									2.99957
biological_process	GO:1901362	organic cyclic compound biosynthetic process																									2.99957
biological_process	GO:0018193	peptidyl-amino acid modification																									2.99957
biological_process	GO:2000112	regulation of cellular macromolecule biosynthetic process																									2.99957
biological_process	GO:0010556	regulation of macromolecule biosynthetic process																									2.99957
biological_process	GO:0051171	regulation of nitrogen compound metabolic process																									2.99957
biological_process	GO:1903506	regulation of nucleic acid-templated transcription																									2.99957
biological_process	GO:0019219	regulation of nucleobase-containing compound metabolic process																									2.99957
biological_process	GO:2001141	regulation of RNA biosynthetic process																									2.99957
biological_process	GO:0051252	regulation of RNA metabolic process																									2.99957
biological_process	GO:0006357	regulation of transcription by RNA polymerase II																									2.99957
biological_process	GO:0006355	regulation of transcription, DNA-templated																									2.99957
biological_process	GO:0006366	transcription by RNA polymerase II																									2.99957
biological_process	GO:0034968	histone lysine methylation																									2.69875
biological_process	GO:0016571	histone methylation																									2.52273
biological_process	GO:0018022	peptidyl-lysine methylation																									2.52273
biological_process	GO:0006401	RNA catabolic process																									2.52273
biological_process	GO:0016071	mRNA metabolic process																									2.09686
biological_process	GO:0008213	protein alkylation																									2.09686
biological_process	GO:0006479	protein methylation																									2.09686
biological_process	GO:0006354	DNA-templated transcription, elongation																									1.79585
biological_process	GO:0032784	regulation of DNA-templated transcription, elongation																									1.79585
biological_process	GO:0016573	histone acetylation																									1.76953
biological_process	GO:0018393	internal peptidyl-lysine acetylation																									1.76953
biological_process	GO:0006475	internal protein amino acid acetylation																									1.76953
biological_process	GO:0043412	macromolecule modification																									1.76953
biological_process	GO:0018394	peptidyl-lysine acetylation																									1.76953
biological_process	GO:0006473	protein acetylation																									1.72122
biological_process	GO:0006464	cellular protein modification process																									1.4202
biological_process	GO:0006402	mRNA catabolic process																									1.4202
biological_process	GO:0036211	protein modification process																									1.4202
cellular_component	GO:0005634	nucleus	>3																2.99957								>3
cellular_component	GO:0043227	membrane-bounded organelle	>3																1.33723								>3
cellular_component	GO:0044424	intracellular part	2.99957											>3	>3				>3			2.99957					2.39783
cellular_component	GO:0043231	intracellular membrane-bounded organelle	2.99957																1.48147								>3
cellular_component	GO:0005622	intracellular	2.69875											>3	>3				>3			2.39783					2.52273
cellular_component	GO:0044428	nuclear part	1.85384																2.52273								>3
cellular_component	GO:0005623	cell	1.67776											>3	>3				2.99957			1.88602					2.39783	1.31875
cellular_component	GO:0043229	intracellular organelle	1.52286											>3	>3			1.56862									2.52273
cellular_component	GO:0043226	organelle	1.52286											>3	>3			1.56862									2.52273
cellular_component	GO:0044464	cell part	1.50862											>3	>3				2.99957			2.04571					2.39783
cellular_component	GO:0016021	integral component of membrane		>3							>3
cellular_component	GO:0031224	intrinsic component of membrane		>3							>3
cellular_component	GO:0044425	membrane part		1.79585						1.38721	>3
cellular_component	GO:0016459	myosin complex				1.31875
cellular_component	GO:0044430	cytoskeletal part					>3										>3
cellular_component	GO:0005856	cytoskeleton					>3										>3
cellular_component	GO:0005874	microtubule					>3										>3
cellular_component	GO:0015630	microtubule cytoskeleton					>3										>3
cellular_component	GO:0099513	polymeric cytoskeletal fiber					>3										>3
cellular_component	GO:0099080	supramolecular complex					>3										>3
cellular_component	GO:0099512	supramolecular fiber					>3										>3
cellular_component	GO:0099081	supramolecular polymer					>3										>3
cellular_component	GO:0044444	cytoplasmic part							1.38721					>3	>3													1.49484
cellular_component	GO:0098588	bounding membrane of organelle								>3
cellular_component	GO:0048475	coated membrane								>3
cellular_component	GO:0030135	coated vesicle								>3
cellular_component	GO:0030662	coated vesicle membrane								>3
cellular_component	GO:0030126	COPI vesicle coat								>3
cellular_component	GO:0030137	COPI-coated vesicle								>3
cellular_component	GO:0030663	COPI-coated vesicle membrane								>3
cellular_component	GO:0031410	cytoplasmic vesicle								>3
cellular_component	GO:0030659	cytoplasmic vesicle membrane								>3
cellular_component	GO:0044433	cytoplasmic vesicle part								>3
cellular_component	GO:0012505	endomembrane system								>3
cellular_component	GO:0005794	Golgi apparatus								>3
cellular_component	GO:0044431	Golgi apparatus part								>3
cellular_component	GO:0005798	Golgi-associated vesicle								>3
cellular_component	GO:0030660	Golgi-associated vesicle membrane								>3
cellular_component	GO:0097708	intracellular vesicle								>3
cellular_component	GO:0030117	membrane coat								>3
cellular_component	GO:0098796	membrane protein complex								>3
cellular_component	GO:0031982	vesicle								>3
cellular_component	GO:0030120	vesicle coat								>3
cellular_component	GO:0012506	vesicle membrane								>3
cellular_component	GO:0098805	whole membrane								>3
cellular_component	GO:0031090	organelle membrane								2.52273
cellular_component	GO:0016020	membrane								1.44369	>3
cellular_component	GO:0009579	thylakoid									2.15484
cellular_component	GO:0044436	thylakoid part									2.15484
cellular_component	GO:0034357	photosynthetic membrane									1.67776
cellular_component	GO:0043232	intracellular non-membrane-bounded organelle												>3	>3			>3		1.67776
cellular_component	GO:0043228	non-membrane-bounded organelle												>3	>3			>3		1.67776
cellular_component	GO:0005840	ribosome												>3	>3			2.30094
cellular_component	GO:1990904	ribonucleoprotein complex												>3	>3			1.82388
cellular_component	GO:0005737	cytoplasm												>3	>3													2.04571
cellular_component	GO:0032991	protein-containing complex												>3	>3
cellular_component	GO:0044391	ribosomal subunit												>3	>3
cellular_component	GO:0015935	small ribosomal subunit												>3	>3
cellular_component	GO:0015934	large ribosomal subunit												2.99957	>3
cellular_component	GO:0022625	cytosolic large ribosomal subunit													>3
cellular_component	GO:0044445	cytosolic part													>3
cellular_component	GO:0022626	cytosolic ribosome													>3
cellular_component	GO:1990234	transferase complex														1.69895
cellular_component	GO:0005819	spindle															>3
cellular_component	GO:0005730	nucleolus																1.72122		>3
cellular_component	GO:0005643	nuclear pore																	1.46851
cellular_component	GO:0030684	preribosome																		>3
cellular_component	GO:0031981	nuclear lumen																		2.04571							2.39783
cellular_component	GO:0070013	intracellular organelle lumen																		1.79585							1.95857
cellular_component	GO:0031974	membrane-enclosed lumen																		1.79585							1.95857
cellular_component	GO:0043233	organelle lumen																		1.79585							1.95857
cellular_component	GO:0042170	plastid membrane																			1.46851
cellular_component	GO:0005846	nuclear cap binding complex																							2.04571
cellular_component	GO:0034518	RNA cap binding complex																							2.04571
cellular_component	GO:0000796	condensin complex																								>3
cellular_component	GO:0000793	condensed chromosome																								2.69875
cellular_component	GO:0044451	nucleoplasm part																									1.82388
cellular_component	GO:0005654	nucleoplasm																									1.60204
cellular_component	GO:0044446	intracellular organelle part																										>3
cellular_component	GO:0044422	organelle part																										>3
cellular_component	GO:0000276	mitochondrial proton-transporting ATP synthase complex, coupling factor F(o)																										2.15484
cellular_component	GO:0005753	mitochondrial proton-transporting ATP synthase complex																										1.55283
cellular_component	GO:0045263	proton-transporting ATP synthase complex, coupling factor F(o)																										1.55283
cellular_component	GO:0033177	proton-transporting two-sector ATPase complex, proton-transporting domain																										1.53759
cellular_component	GO:1902494	catalytic complex																											2.52273
cellular_component	GO:0033202	DNA helicase complex																											1.88602
cellular_component	GO:0031011	Ino80 complex																											1.88602
cellular_component	GO:0097346	INO80-type complex																											1.88602
cellular_component	GO:0000790	nuclear chromatin																											1.85384
cellular_component	GO:0070603	SWI/SNF superfamily-type complex																											1.85384
cellular_component	GO:1904949	ATPase complex																											1.82388
cellular_component	GO:0044454	nuclear chromosome part																											1.52286
cellular_component	GO:0000228	nuclear chromosome																											1.38721
molecular_function	GO:0003676	nucleic acid binding	2.39783																								2.69875
molecular_function	GO:0003729	mRNA binding	1.40892
molecular_function	GO:0003824	catalytic activity		>3	1.36652						>3
molecular_function	GO:0016491	oxidoreductase activity		>3							>3
molecular_function	GO:0048037	cofactor binding		>3
molecular_function	GO:0004866	endopeptidase inhibitor activity		>3
molecular_function	GO:0061135	endopeptidase regulator activity		>3
molecular_function	GO:0030414	peptidase inhibitor activity		>3
molecular_function	GO:0061134	peptidase regulator activity		>3
molecular_function	GO:0004867	serine-type endopeptidase inhibitor activity		>3
molecular_function	GO:0020037	heme binding		2.69875
molecular_function	GO:0008061	chitin binding		2.30094
molecular_function	GO:0004857	enzyme inhibitor activity		2.30094
molecular_function	GO:0005199	structural constituent of cell wall		2.30094
molecular_function	GO:0046906	tetrapyrrole binding		2.15484
molecular_function	GO:0016209	antioxidant activity		1.56862
molecular_function	GO:0016758	transferase activity, transferring hexosyl groups		1.52286	1.69895
molecular_function	GO:0050662	coenzyme binding		1.39793
molecular_function	GO:0016740	transferase activity			>3
molecular_function	GO:0016757	transferase activity, transferring glycosyl groups			>3
molecular_function	GO:0016741	transferase activity, transferring one-carbon groups			>3
molecular_function	GO:0008194	UDP-glycosyltransferase activity			>3
molecular_function	GO:0008171	O-methyltransferase activity			2.99957
molecular_function	GO:0008168	methyltransferase activity			2.30094
molecular_function	GO:0042085	5-methyltetrahydropteroyltri-L-glutamate-dependent methyltransferase activity			1.38721
molecular_function	GO:0003871	5-methyltetrahydropteroyltriglutamate-homocysteine S-methyltransferase activity			1.38721
molecular_function	GO:0005525	GTP binding					>3			1.48147
molecular_function	GO:0032561	guanyl ribonucleotide binding					>3			1.48147
molecular_function	GO:0001883	purine nucleoside binding					>3			1.48147
molecular_function	GO:0032550	purine ribonucleoside binding					>3			1.48147
molecular_function	GO:0019001	guanyl nucleotide binding					>3			1.46851
molecular_function	GO:0001882	nucleoside binding					>3			1.46851
molecular_function	GO:0032549	ribonucleoside binding					>3			1.46851
molecular_function	GO:0003924	GTPase activity					>3
molecular_function	GO:0005200	structural constituent of cytoskeleton					>3
molecular_function	GO:0004047	aminomethyltransferase activity					2.22178
molecular_function	GO:0017111	nucleoside-triphosphatase activity					1.76953										1.43179									>3
molecular_function	GO:0016818	hydrolase activity, acting on acid anhydrides, in phosphorus-containing anhydrides					1.63825										1.37674									>3
molecular_function	GO:0016462	pyrophosphatase activity					1.63825										1.37674									>3
molecular_function	GO:0016817	hydrolase activity, acting on acid anhydrides					1.61977										1.36652									>3
molecular_function	GO:0045156	electron transporter, transferring electrons within the cyclic electron transport pathway of photosynthesis activity						>3
molecular_function	GO:0050136	NADH dehydrogenase (quinone) activity						2.69875
molecular_function	GO:0008137	NADH dehydrogenase (ubiquinone) activity						2.69875
molecular_function	GO:0003954	NADH dehydrogenase activity						2.69875
molecular_function	GO:0016655	oxidoreductase activity, acting on NAD(P)H, quinone or similar compound as acceptor						2.30094
molecular_function	GO:0016651	oxidoreductase activity, acting on NAD(P)H						1.69895
molecular_function	GO:0000049	tRNA binding							2.30094
molecular_function	GO:0004127	cytidylate kinase activity								1.50862
molecular_function	GO:0022857	transmembrane transporter activity									>3
molecular_function	GO:0005215	transporter activity									>3
molecular_function	GO:0022804	active transmembrane transporter activity									2.69875
molecular_function	GO:0016787	hydrolase activity									2.52273															>3
molecular_function	GO:0016627	oxidoreductase activity, acting on the CH-CH group of donors									1.40892
molecular_function	GO:0008238	exopeptidase activity									1.35654
molecular_function	GO:0017022	myosin binding										1.37674
molecular_function	GO:0003735	structural constituent of ribosome												>3	>3			>3
molecular_function	GO:0005198	structural molecule activity												>3	>3			1.99996
molecular_function	GO:0003723	RNA binding												1.35654	>3
molecular_function	GO:0019843	rRNA binding													2.09686
molecular_function	GO:0008097	5S rRNA binding													2.04571
molecular_function	GO:0008092	cytoskeletal protein binding															>3									>3
molecular_function	GO:0008017	microtubule binding															>3									>3
molecular_function	GO:0003777	microtubule motor activity															>3									>3
molecular_function	GO:0003774	motor activity															>3									>3
molecular_function	GO:0015631	tubulin binding															>3									>3
molecular_function	GO:0005524	ATP binding															1.92078					>3				>3
molecular_function	GO:0030554	adenyl nucleotide binding															1.88602					>3				>3
molecular_function	GO:0032559	adenyl ribonucleotide binding															1.88602					>3				>3
molecular_function	GO:0008144	drug binding															1.88602					>3				>3
molecular_function	GO:0035639	purine ribonucleoside triphosphate binding															1.56862					>3				>3
molecular_function	GO:0017076	purine nucleotide binding															1.43179					>3				>3
molecular_function	GO:0032555	purine ribonucleotide binding															1.43179					>3				>3
molecular_function	GO:0032553	ribonucleotide binding															1.4202					>3				>3
molecular_function	GO:0097367	carbohydrate derivative binding															1.39793					>3				>3
molecular_function	GO:0004386	helicase activity																	1.58501
molecular_function	GO:0005515	protein binding																	1.52286			1.99996				>3	>3
molecular_function	GO:0017056	structural constituent of nuclear pore																	1.40892
molecular_function	GO:0008173	RNA methyltransferase activity																		2.39783
molecular_function	GO:0005488	binding																				>3					>3
molecular_function	GO:0051082	unfolded protein binding																				>3
molecular_function	GO:0031072	heat shock protein binding																				2.99957
molecular_function	GO:1901363	heterocyclic compound binding																				2.99957
molecular_function	GO:0097159	organic cyclic compound binding																				2.99957
molecular_function	GO:1901265	nucleoside phosphate binding																				2.69875				>3
molecular_function	GO:0000166	nucleotide binding																				2.69875				>3
molecular_function	GO:0043168	anion binding																				2.39783				>3
molecular_function	GO:0036094	small molecule binding																				1.82388				>3
molecular_function	GO:0003830	beta-1,4-mannosylglycoprotein 4-beta-N-acetylglucosaminyltransferase activity																					1.53759
molecular_function	GO:0003883	CTP synthase activity																					1.34678
molecular_function	GO:0003700	DNA-binding transcription factor activity																						>3
molecular_function	GO:0140110	transcription regulator activity																						>3
molecular_function	GO:0000339	RNA cap binding																							1.48147
molecular_function	GO:0043167	ion binding																								1.58501
molecular_function	GO:0003677	DNA binding																									1.82388
molecular_function	GO:0018024	histone-lysine N-methyltransferase activity																									1.53759
molecular_function	GO:0042054	histone methyltransferase activity																									1.49484
molecular_function	GO:0016278	lysine N-methyltransferase activity																									1.34678
molecular_function	GO:0016279	protein-lysine N-methyltransferase activity																									1.34678
1-41 - modules identified by weighted gene co-expression network analysis

## Sheet: Table S7
Resistance of narrow-leafed lupin to Diaporthe toxica is based on rapid activation of defense response genes
International Journal of Molecular Sciences
Supplementary Table S7. Overrepresented gene ontology terms identified for the sets of genes which were significantly upregulated only in 75A:258 or in Wonga
Ontology	Term ID	Term description	75A:258	Wonga
biological_process	GO:0045454	cell redox homeostasis	1.79588
biological_process	GO:0055114	oxidation-reduction process	2.30103
biological_process	GO:0009405	pathogenesis		1.45593
biological_process	GO:0055085	transmembrane transport		1.45593
cellular_component	GO:0009986	cell surface		1.52288
cellular_component	GO:0005576	extracellular region	2
molecular_function	GO:0015036	disulfide oxidoreductase activity	2.69897
molecular_function	GO:0009055	electron transfer activity	1.4437
molecular_function	GO:0005539	glycosaminoglycan binding		1.74473
molecular_function	GO:0008201	heparin binding		1.74473
molecular_function	GO:0016491	oxidoreductase activity	2.69897
molecular_function	GO:0016667	oxidoreductase activity, acting on a sulfur group of donors	2
molecular_function	GO:0016701	oxidoreductase activity, acting on single donors with incorporation of molecular oxygen		3
molecular_function	GO:0015035	protein disulfide oxidoreductase activity	3
molecular_function	GO:0022857	transmembrane transporter activity		1.72125
molecular_function	GO:0005215	transporter activity		2.69897

## Sheet: Table_S8
Resistance of narrow-leafed lupin to Diaporthe toxica is based on rapid activation of defense response genes
International Journal of Molecular Sciences
Supplementary Table S8. Results of differential gene expression profiling.
Gene	Protein	Description	Chromosome or scaffold	Gene start (nt)	Gene end (nt)	Base mean	75A:258 log2(fold-change)					Wonga log2(fold-change)			Emir log2(fold-change)														75A:258 significance					Wonga significance			Emir significance
							1 DPI	5 DPI	9DPI	16 DPI	23 DPI	1 DPI	5 DPI	9DPI	1 DPI	5 DPI	9DPI	1_padj	2_padj	3_padj	4_padj	5_padj	6_padj	7_padj	8_padj	9_padj	10_padj	11_padj	1 DPI	5 DPI	9DPI	16 DPI	23 DPI	1 DPI	5 DPI	9DPI	1 DPI	5 DPI	9DPI
TanjilG_02203	OIW11996	cucumber peeling cupredoxin-like	LG05	10874487	10876065	224.766	3.9722	6.88177	4.31736	4.27875	4.62701	3.19603	3.99783	6.4116	4.93424	3.38613	6.27865	0.0177923176525379	1.23349856983708e-07	0.00399720965356274	0.00299826779409072	0.000307025920123669	0.00121145738044633	0.0451328484742205	5.23890685542379e-09	0.0307205182190822	0.0014316433322259	8.66265087319722e-09	1	1	1	1	1	1	1	1	1	1	1
TanjilG_02313	OIV92550	putative lipid-transfer protein DIR1	LG19	272387	274891	5147.55	3.14169	7.94659	4.20835	7.5396	5.95538	3.26666	5.78482	8.62659	3.67172	3.80685	8.64673	0.0446065179685119	2.05223719754706e-11	0.00783966227982798	6.55760813479832e-10	9.42848780973685e-07	0.0293784793839839	0.0222066055535141	3.88639208030121e-15	0.0362931647238199	4.37525317191063e-06	9.43101802809836e-15	1	1	1	1	1	1	1	1	1	1	1
TanjilG_06150	OIW21532	tryptophan aminotransferase-related protein 4-like	Scaffold_144_9	3387	6957	4167.3	3.22778	5.8775	4.0732	5.36587	6.20987	4.56117	4.17285	7.79851	3.73484	3.78213	8.33358	0.0167019869009176	6.01592735385754e-08	0.00280241885080362	1.96264144697853e-06	5.10113306755944e-09	0.00813345905371822	0.00593286133731489	2.19159728845464e-17	0.00023291705123785	0.000346860340211477	5.65879256970533e-15	1	1	1	1	1	1	1	1	1	1	1
TanjilG_15273	OIV97208	early nodulin-like protein 1	LG15	4505891	4507753	1531.68	3.20946	4.85691	3.39356	2.88335	5.45677	3.21868	3.98249	6.03678	4.24136	3.46929	8.08475	0.000950928732339248	2.94489847926769e-09	0.000702200664592207	0.00351044084475189	1.26933122898834e-11	3.04490179462651e-06	0.00031142181934186	5.26442322265561e-27	0.00078930536184499	4.15841784735061e-06	3.15131003461762e-15	1	1	1	1	1	1	1	1	1	1	1
TanjilG_20118	OIW08017	isoflavone 2'-hydroxylase-like	LG07	9025641	9027136	2167.77	3.32782	4.83837	4.67519	3.60927	5.8872	4.14423	2.9314	8.02213	4.06325	4.36781	7.31765	0.00836379851627726	5.7722957948945e-06	0.000110921184617373	0.00367114052182103	8.48827095162497e-09	0.00152306599550649	0.000271772082687344	1.03377644699253e-14	0.000507875166332392	0.0114034211921215	7.16458851139339e-17	1	1	1	1	1	1	1	1	1	1	1
TanjilG_24849	OIW11643	glutathione S-transferase 3-like	LG05	20855238	20856542	3520.93	5.76834	9.30154	7.65232	11.8539	8.92175	5.20385	6.37924	10.2733	5.89367	6.8741	10.2148	0.0133806554223964	1.74348802502857e-06	0.000902348378193864	1.02166145280091e-06	4.86491534715199e-06	0.0239456780467175	0.00359109558138626	6.16621631768556e-09	0.0321200214489225	0.00192251554458192	1.23859099471223e-08	1	1	1	1	1	1	1	1	1	1	1
TanjilG_01405	OIV90209	polygalacturonase QRT3	LG20	19690947	19693163	124.726	3.55602	5.61209	3.79372	4.19555	6.95783	3.66923	3.30835	6.76045	2.36894	4.68346	6.14849	0.0196881835062013	3.90150257330386e-07	0.0105274493281738	0.00361053633372863	0.000221363562867048	0.350013341023632	0.000277261018583663	2.95769595567262e-09	0.00505556170026275	0.00589692166005334	3.43233391888621e-10	1	1	1	1	1	1	1	1	0	1	1
TanjilG_02547	OIW07227	isoflavone-7-O-methyltransferase 9-like	LG08	3350358	3352085	973.485	5.69649	5.63907	4.57531	6.68047	6.91705	1.00596	3.44913	8.55868	3.65775	4.40683	7.60849	1.07725238277641e-05	1.51704223806002e-06	0.00105888133662733	2.34047499402677e-08	1.71607563830919e-09	0.022041546345682	0.00135361627232006	4.72459379660465e-13	0.679376724523344	0.00631788712259517	1.44549044920301e-15	1	1	1	1	1	0	1	1	1	1	1
TanjilG_05213	OIW06442	basic endochitinase-like	LG08	11631741	11632643	6312.24	2.88316	6.50397	3.74579	4.05746	4.97951	4.13501	4.74451	4.98273	1.52188	3.03903	7.83476	0.0240806287997795	2.96600573740913e-11	0.00340910416298938	0.000296039579629645	8.58898789322254e-07	0.497719423128056	0.0337009341489963	1.3676126626023e-17	0.000367824034957989	6.8170128787498e-06	2.66116362529904e-07	1	1	1	1	1	1	1	1	0	1	1
TanjilG_10317	OIW19097	probable WRKY transcription factor 75	Scaffold_2_271	4882	8826	473.359	1.95781	4.50563	3.23174	3.18343	3.7972	2.49279	2.36087	6.32329	3.19036	2.86013	6.34276	0.120240177337808	1.32461840621465e-06	0.00640953257125399	0.00415146859030897	5.78399985187904e-05	0.00722845687646157	0.0236047814700988	3.09300702979131e-14	0.0331237735700967	0.0236224882225752	1.52790196318581e-13	0	1	1	1	1	1	1	1	1	1	1
TanjilG_10939	OIV95551	isoflavone-7-O-methyltransferase 9-like	LG16	11788875	11790596	1765.57	5.31457	7.01519	6.57909	8.10491	8.06692	1.97652	3.50252	9.79275	4.29314	5.38188	8.92184	0.00120982023507144	6.26726898746561e-07	2.49272164975773e-05	2.32664085495845e-08	4.43775380252575e-09	0.033034368827485	0.00106822140834619	2.23195746673207e-12	0.385948845932132	0.0255102209253209	2.85247777174071e-14	1	1	1	1	1	0	1	1	1	1	1
TanjilG_13015	OIW03221	GDSL esterase/lipase 1-like	LG10	11523580	11525694	437.226	2.44393	4.18268	2.80853	3.49729	3.73009	2.55419	3.48653	5.51748	2.88803	3.85374	8.07617	0.0494712652185306	3.08088577251781e-05	0.0508508254334201	0.0018124785942579	0.000248886360390154	0.0395786635736701	0.00147140254142588	5.76548461348284e-19	0.038903156150545	0.000813013300281828	1.04925075890819e-09	1	1	0	1	1	1	1	1	1	1	1
TanjilG_14846	OIV98257	early nodulin-like protein 1	LG14	4398127	4399554	1653.62	3.4063	4.78549	2.50779	5.08514	4.81231	2.57442	3.84311	6.70613	3.38313	3.35868	6.7761	0.00222023314952419	5.20763007043068e-07	0.100874623265748	1.44934411755304e-07	2.94149796226416e-07	0.0050749002488436	0.00434282892200172	2.88147787011309e-15	0.0326277104631786	0.000125292743222836	9.75664758965554e-15	1	1	0	1	1	1	1	1	1	1	1
TanjilG_19904	OIW14488	probable WRKY transcription factor 75	LG03	28377468	28380151	98.5677	2.60494	4.54641	3.87615	3.47157	4.37801	3.01507	3.3255	9.03359	2.32332	3.32387	7.65491	0.0245989730922393	3.44725275428185e-06	0.00105888133662733	0.00209432549759304	1.09267065397311e-05	0.115264616326608	0.00606114378022023	9.15340981642469e-15	0.0082477450385675	0.00173389128447979	2.58229541743858e-15	1	1	1	1	1	1	1	1	0	1	1
TanjilG_23505	OIW05719	cyanogenic beta-glucosidase-like	LG08	24256398	24259227	521.913	3.53713	4.70503	3.8951	6.36851	6.8337	3.72355	3.20251	8.10409	1.66012	4.65227	6.832	0.0264663280508418	0.000795028738216287	0.0357317935119688	1.08048059923792e-05	1.19985078541417e-07	0.587182381231389	0.00352423829798663	6.905719751153e-09	0.0187540880314247	0.0269583004692838	2.06718802014623e-11	1	1	1	1	1	1	1	1	0	1	1
TanjilG_25153	OIV92721	UDP-glycosyltransferase 72E1-like	LG18	15560650	15563123	155.793	3.55262	6.91603	4.90774	6.00023	6.01839	2.56209	6.56684	7.22972	5.65808	6.40025	7.67498	0.0455214572375074	1.07339813679378e-05	0.0131431100454653	0.00245914606559909	8.88998869843758e-05	0.00263516780170338	0.000500727383170768	1.8496197531198e-09	0.199850944207594	5.03954514545386e-05	1.68400951513593e-07	1	1	1	1	1	0	1	1	1	1	1
TanjilG_30382	OIV91160	cysteine-rich receptor-like protein kinase 29	LG20	2525535	2528530	356.974	2.26863	2.87843	2.08691	2.82525	4.36923	2.75474	2.23717	4.64783	2.33701	3.61834	5.5354	0.0202953736359051	0.000820512731622708	0.104265209639357	0.00238069897352398	2.85209933007523e-08	0.035809087272307	4.74658529445974e-05	1.66966644253119e-14	0.00327924669655158	0.0107065534796953	3.88554980135703e-10	1	1	0	1	1	1	1	1	1	1	1
TanjilG_31531	OIW18391	stress-induced protein SAM22-like	LG01	23387068	23387825	3110.91	2.64922	5.09128	3.14932	3.36239	4.59258	4.36937	3.78781	5.86469	2.11029	4.04214	6.25594	0.0442606598009778	7.834319711052e-07	0.0316902545611046	0.00700561276726377	1.00503887207578e-05	0.232109096265035	0.000782359115741499	2.63988505792848e-11	0.000168142023110045	0.000575977789806434	1.02344352165244e-09	1	1	1	1	1	1	1	1	0	1	1
TanjilG_32088	OIW09939	cation/H(+) antiporter 18-like	LG06	12652300	12657486	464.751	3.47567	5.71028	4.05036	4.88666	4.54324	3.33339	3.34972	6.17589	2.48194	3.91539	7.41752	0.00206239177019769	2.7392904411891e-09	0.000525691342017961	5.20486726752117e-06	3.43320428091751e-06	0.0859131487575149	0.000540865524336885	4.25638470239294e-17	0.00357397499781869	0.00130827073596901	5.96066734407381e-12	1	1	1	1	1	1	1	1	0	1	1
TanjilG_01449	OIV95655	non-specific lipid-transfer protein 1-like	LG16	6345451	6345798	8900.67	2.25471	5.65523	3.24904	1.89926	4.79695	2.90667	4.7636	7.37409	3.05404	3.66369	6.95135	0.0787448022398571	1.87377710152869e-09	0.0107990670865245	0.25687801988594	5.05509359931517e-07	0.0187860563859587	0.00144389518308679	1.34168530059708e-15	0.013979101415956	1.49344226911527e-06	4.117542272972e-17	0	1	1	0	1	1	1	1	1	1	1
TanjilG_02482	OIW21373	germin-like protein subfamily 1 member 7	Scaffold_113_12	126	1385	7.10036	18.012	23.8262	23.8479	0	25.9304	0	22.6719	27.6908	21.3514	22.7769	28.3987	0.00233819947336252	3.65648136358861e-06	2.49272164975773e-05	1	1.68410497945794e-07	0.000485208545357367	5.72490576094064e-05	8.80612119144493e-10	1	2.20173532852967e-05	4.39599860718437e-09	1	1	1	0	1	0	1	1	1	1	1
TanjilG_02559	OIW21392	elongation factor 1-alpha-like	Scaffold_114_14	30182	31801	269.021	4.59387	7.03722	3.84904	3.70903	3.0734	2.78147	4.90488	5.8165	0.816217	3.94374	4.82718	0.000925186691695243	4.08103159187374e-09	0.0170090605444103	0.0112703791868793	0.0337368101371612	0.879576827130334	0.00892278380744087	1.49614411340731e-05	0.0804169697160624	0.000108800108679439	2.85858055264142e-07	1	1	1	1	1	0	1	1	0	1	1
TanjilG_04113	OIW12364	---NA---	LG05	101705	102007	151.372	3.63239	7.21408	3.95266	4.32246	5.12851	4.86553	4.25315	7.19668	2.67405	3.50855	7.95879	0.0185493603688585	1.91601559907279e-07	0.0287071362292802	0.00966183656212052	0.000259285830248024	0.214903519440007	0.0916576916977302	7.07659373917332e-11	0.000696518645657023	0.00166753196694249	4.56428685613614e-09	1	1	1	1	1	1	1	1	0	0	1
TanjilG_05925	OIW08949	ADP,ATP carrier protein 1, mitochondrial-like	LG06	32299675	32301546	731.452	2.4336	3.49135	1.99967	2.65131	5.02573	2.93912	2.73564	4.77628	2.41688	2.94489	6.28372	0.0384870739717029	0.000406919178154939	0.273426466535249	0.026980985672164	2.63840403512555e-08	0.0788848584771584	0.0174422225489788	6.28435341425304e-14	0.00772652845571599	0.0067142924063251	3.69101062618768e-08	1	1	0	1	1	1	1	1	0	1	1
TanjilG_08455	OIW07568	vesicle-associated membrane protein 722-like	LG07	17755737	17757245	184.208	2.58478	3.75177	2.31519	2.75404	3.38485	2.42899	2.61391	4.5647	3.21513	2.86461	7.49543	0.0398359348645698	0.000435278444888203	0.19575758502385	0.036772811167823	0.00173771897969252	0.0153759925829481	0.0463311179210264	3.27534399429358e-16	0.0620338931167815	0.017450805480143	1.22021985102594e-06	1	1	0	1	1	0	1	1	1	1	1
TanjilG_08905	OIW19105	hypothetical protein TanjilG_08905	LG01	12352394	12355768	108.68	2.66848	3.047	2.53502	3.40399	2.97662	2.27535	2.4249	3.15661	-0.848995	2.34428	4.7882	0.0107622174339253	0.00118182874408735	0.0452860224132179	0.000608338169624549	0.00160528478516843	0.739774389714806	0.0629725161023452	1.52476004636038e-09	0.0344635836160547	0.0106403248648554	0.000183829576654205	1	1	1	1	1	1	1	1	0	0	1
TanjilG_09186	OIW13152	probable glutathione S-transferase	LG04	19629127	19630467	294.673	3.98923	7.04234	3.24216	4.13442	4.64352	1.77873	3.49842	5.82807	2.84726	3.69957	7.83919	0.00129942664189014	1.32321390160019e-10	0.0413911711336852	0.00177219508878199	6.73385392920743e-05	0.0707052860170599	0.00767657818454963	6.60494062997638e-15	0.276021658124501	0.00304893883269138	2.55048793608721e-08	1	1	1	1	1	0	1	1	0	1	1
TanjilG_09247	OIV96705	sulfate transporter 1.3-like isoform X1	LG15	17562164	17566214	2261.37	2.52848	3.04572	1.8804	2.01265	2.2068	2.1956	2.20763	4.0068	0.820967	2.51466	4.201	0.000344753683889401	1.26196031598455e-06	0.0369539036205866	0.0080400755935965	0.00104177216685541	0.582780633433734	0.000513960435385083	1.11867036857293e-13	0.00294941587634234	0.000958155419278901	3.05586170166059e-12	1	1	0	1	1	1	1	1	0	1	1
TanjilG_10626	OIW19065	protein LURP-one-related 15-like	LG01	15263113	15264363	49.6195	7.90205	4.26857	5.06435	6.25145	6.25591	4.66703	4.3673	10.5644	7.02544	3.73199	7.31082	0.00101772273384906	0.02493291262157	0.052483306696475	0.0183080533233488	0.00399819814630624	0.00931028509142144	0.343519236722714	1.21591437483828e-06	0.0366133923577946	0.0149116779959471	6.52034607472986e-08	1	1	0	1	1	1	1	1	1	0	1
TanjilG_10706	OIV90406	GDSL esterase/lipase At5g03610-like	LG20	14867880	14872789	166.173	2.1273	2.10095	2.1572	2.4592	2.4999	2.04739	2.43011	3.88984	1.37131	1.81615	3.20744	0.00444080292832052	0.00188868407482744	0.00806014671551533	0.000550682410529143	0.000259285830248024	0.180248849767135	0.0374489500579505	2.5571496863652e-08	0.00574330385662459	0.000237803933638535	1.13093716500874e-11	1	1	1	1	1	1	1	1	0	0	1
TanjilG_12896	OIW01356	naringenin,2-oxoglutarate 3-dioxygenase-like	LG11	32535330	32538537	916.028	3.32839	8.46801	6.38468	11.3897	8.33504	5.76549	5.86394	10.8024	4.7523	5.27894	8.80734	0.163706909974716	5.23369546989309e-06	0.00310462565324306	3.05932407356433e-07	1.91761841748367e-06	0.0511428084301965	0.0249613751484977	1.78757976579766e-08	0.00534537921745053	0.00156505667983311	1.78113402498707e-10	0	1	1	1	1	1	1	1	0	1	1
TanjilG_15363	OIW09657	DUF4228 domain protein	LG06	21176088	21176414	167.824	4.97394	9.86429	4.34044	5.77596	5.2628	5.78678	4.56696	9.14125	5.25041	3.63287	8.26601	0.014462488786827	8.39659702108269e-06	0.136899291835949	0.0112703791868793	0.00684587388315224	0.0220310059835528	0.309028727103173	1.6699144533992e-07	0.00471804545520153	0.0148950845352915	3.77287553677851e-06	1	1	0	1	1	1	1	1	1	0	1
TanjilG_15882	OIW10510	glutathione S-transferase U17-like	LG06	5670884	5671831	591.54	1.78412	2.35277	1.42739	2.56331	4.68729	3.07953	2.06763	3.70313	2.16643	2.09099	3.78913	0.0245810480189502	0.000610753395701242	0.239895433423765	0.000293468953555801	2.67228561689007e-14	0.00898845681111312	0.0126122379732148	7.58230463912248e-11	8.56373937369676e-06	0.00285560510940366	4.68011595450941e-10	0	1	0	1	1	1	1	1	1	1	1
TanjilG_18616	OIW16928	syntaxin 1B/2/3	LG02	10269920	10271536	151.759	2.31863	3.25754	1.8883	2.98181	4.93857	2.56778	3.22704	5.0385	2.4706	3.6914	5.58413	0.0449962319975907	0.00093024666862978	0.312737668817793	0.0102018136381996	1.41747431324853e-07	0.0622189990676881	0.000560403583924097	1.35969742486403e-11	0.0217399361053678	0.00101543705311428	5.49158355623102e-09	1	1	0	1	1	1	1	1	0	1	1
TanjilG_19517	OIW06868	Basic secretory protease	LG08	7380969	7381646	8154.76	2.71954	4.02116	3.00287	3.0501	3.45216	0.874651	2.77031	5.23178	1.99133	2.47537	5.91199	0.000273390876624777	3.13343392642619e-10	5.80889744812926e-05	9.08908280410967e-06	9.44865638040839e-08	0.0294465795293268	0.0018030135228372	1.18676759111073e-23	0.43355731094215	6.79056673676347e-05	2.31355836773756e-18	1	1	1	1	1	0	1	1	0	1	1
TanjilG_19917	OIV89538	hypothetical protein TanjilG_19917	KV862280	20922	21731	259.444	3.47377	3.84815	2.3259	2.95923	4.83451	3.07799	2.8362	5.41691	3.41516	4.3453	7.30619	0.0127686590259876	0.0021532334436944	0.336753992938773	0.0635817382152478	3.66399063434373e-05	0.0346397472223219	0.00161761737931337	4.35888522209855e-12	0.0326607406056148	0.0268632206010979	7.42493583423953e-07	1	1	0	0	1	1	1	1	1	1	1
TanjilG_20188	OIW17084	putative receptor-like protein kinase At1g72540	LG02	5717883	5720273	299.184	3.80553	3.87158	4.50113	5.08339	6.89446	4.21908	3.53959	5.88234	1.0791	2.76932	7.04367	0.0127686590259876	0.00683984556008352	0.00448491557318662	0.000519867009177622	6.30662350532663e-08	0.80896174841563	0.276407093856265	1.21959773139318e-09	0.00449657240231991	0.0107668370767506	9.85225229923822e-07	1	1	1	1	1	1	1	1	0	0	1
TanjilG_20689	OIV93027	probable 1-deoxy-D-xylulose-5-phosphate synthase 2, chloroplastic	LG18	12744185	12748157	429.815	2.00812	2.2646	0.434034	2.00323	3.34266	0.646539	2.56989	3.53189	2.09959	2.95198	3.56282	0.005702952947312	0.00053431298633608	0.94267530721571	0.00614889410391281	1.80507944815028e-08	0.00729421342877999	5.53537897022539e-06	1.31436721131171e-10	0.571965167649332	5.67387408159768e-05	4.56093618457685e-10	1	1	0	1	1	0	1	1	1	1	1
TanjilG_22225	OIV89410	PREDICTED: uncharacterized protein LOC109341273	KV862302	298352	298630	383.659	1.62603	3.43274	4.75352	4.60729	5.75217	5.31114	5.09986	8.09215	3.89146	4.30968	7.54041	0.51805474193965	0.0468531614994063	0.00972701052163009	0.00753970850120635	4.90864679473487e-05	0.0534324682770685	0.0254758563461553	5.47462408263852e-09	0.00100979393706789	0.000751756749832762	1.26370138350027e-09	0	1	1	1	1	1	1	1	0	1	1
TanjilG_22353	OIV89390	VQ motif protein	KV862305	267075	267437	529.207	2.18746	5.39825	3.95056	5.32839	6.51588	3.46752	4.90838	8.01949	2.74906	5.14522	7.09479	0.264120060287915	8.88598639242348e-05	0.0366097159005328	0.000352561336440122	5.48707825893054e-07	0.215778710886644	0.00121726108870679	3.84877661382167e-09	0.0384666343078139	0.000529218917211351	9.43777566233233e-11	0	1	1	1	1	1	1	1	0	1	1
TanjilG_22716	OIV95573	naringenin 8-dimethylallyltransferase 2, chloroplastic-like	LG16	9498479	9502979	479.838	2.94922	2.03855	3.65572	3.24488	5.85888	2.94993	1.6716	5.36399	2.83578	4.39107	6.63782	0.0171068096101334	0.139671147199113	0.00457223818693688	0.0126092257526418	8.34343027266034e-09	0.0492085641733676	0.000130384139030765	4.45888083478594e-13	0.0174513651637153	0.18579610609551	1.66921963405533e-08	1	0	1	1	1	1	0	1	1	1	1
TanjilG_22717	OIV95574	hypothetical protein TanjilG_22717	LG16	9670688	9677082	225.139	6.68302	11.831	8.12897	5.73089	7.86356	5.14626	4.72431	8.53078	3.88114	7.34459	9.48857	0.00747368376626753	3.66713495258956e-09	2.5147860572344e-05	0.00337133854752678	2.54866618913431e-06	0.338835131064929	0.000458782457224405	4.28527575670138e-11	0.0606040565539132	0.00519968777587628	1.53471088135504e-08	1	1	1	1	1	0	1	1	0	1	1
TanjilG_24182	OIW04485	hypothetical protein TanjilG_24182	LG09	18225604	18236560	3871.76	1.8056	3.66428	3.00731	3.16244	3.95138	2.9521	2.62641	5.70615	1.62168	2.79844	6.83218	0.072148986096456	1.81682001428897e-06	0.00105888133662733	0.000121273690553069	1.19696941980069e-07	0.204615190792233	0.00255192249839371	1.06194187605493e-23	0.000696518645657023	0.00126810627047073	1.86397773514159e-16	0	1	1	1	1	1	1	1	0	1	1
TanjilG_24253	OIW00523	glutathione transferase GST 23-like	LG12	12034692	12036037	385.911	5.24562	7.36808	4.03619	18.8529	23.4671	6.20991	5.86947	9.47754	8.10975	19.9916	9.48852	0.0652857309920099	0.00554497802728761	0.479184497602028	1.6029415082854e-14	5.53300442250217e-24	0.00678692843199181	6.95069609475693e-17	4.52136362121246e-06	0.0254247637822418	0.0234210089744206	3.06571103932308e-05	0	1	0	1	1	1	1	1	1	1	1
TanjilG_26613	OIV91760	polyphenol oxidase, chloroplastic-like	LG19	16866742	16868520	6803.93	2.243	3.27917	2.67974	2.77195	2.48344	2.73691	2.77098	6.56364	1.81218	2.38601	7.8557	0.0499860887263071	0.000591837110803341	0.0357317935119688	0.0113615246529846	0.0189837515559147	0.239782463091197	0.0800852567339279	4.52075340694159e-23	0.0108202647695808	0.00396070613242683	4.44513607396609e-16	1	1	1	1	1	1	1	1	0	0	1
TanjilG_27014	OIV95910	AChain A, Protein LlR18A	LG16	1478749	1479103	10339.4	2.30795	4.26033	2.55498	4.56872	5.0955	1.19017	3.11447	4.80576	1.93994	3.47899	4.4991	0.0153380183473293	1.91983353629847e-08	0.0132300362222431	1.04242807160778e-09	3.61428088382125e-12	0.0974364643849139	4.74658529445974e-05	1.86052193872502e-10	0.328859994170647	0.00013694366432512	1.42083319585731e-11	1	1	1	1	1	0	1	1	0	1	1
TanjilG_27015	OIV95911	AChain A, Protein LlR18A	LG16	1479881	1480950	19291.3	2.29382	4.30183	2.61558	4.56608	5.08292	1.04934	2.75256	4.88828	1.82478	3.46456	4.69045	0.0158885956614248	1.37591758298778e-08	0.00988511368101248	1.00300120798969e-09	3.61428088382125e-12	0.135238600839923	5.05645583122021e-05	2.42805417402088e-11	0.414071186968266	0.000854513825696827	5.7765826674538e-12	1	1	1	1	1	0	1	1	0	1	1
TanjilG_27107	OIV96003	peroxidase A2-like	LG16	2268907	2271497	3285.78	2.3361	5.94551	4.366	4.17055	3.41406	1.15082	3.0181	5.87855	1.14725	3.38611	7.29048	0.0389763254439739	1.7272069151389e-12	8.64359005841301e-06	5.41383844128899e-06	0.000234083151758217	0.591485170065623	0.00116623697926946	3.15062756413336e-20	0.444419001084484	0.00139400082583473	3.78315039716012e-13	1	1	1	1	1	0	1	1	0	1	1
TanjilG_27897	OIW10146	phospholipase A1-IIgamma-like	LG06	7062829	7064875	209.479	4.71781	24.802	24.0494	19.4145	23.4598	4.94259	24.9658	27.4616	22.0795	21.2817	11.0624	0.36690784771293	8.75898046110533e-14	2.01778044922233e-12	3.17144866129925e-08	2.00157337321735e-12	1.10462689550399e-10	9.18074769801969e-10	0.000763637363112389	0.346378457976206	1.3452455416797e-13	6.90966897709034e-18	0	1	1	1	1	0	1	1	1	1	1
TanjilG_28795	OIW05330	hypothetical protein TanjilG_28795	LG09	2477875	2481100	356.373	2.59084	2.70555	3.32283	4.25138	4.34103	3.39346	2.74201	6.39955	1.84964	3.68769	7.58795	0.0535752138454993	0.0331660441024566	0.0211147472144646	0.000385316686977746	6.76050204512708e-05	0.348367911321602	0.00452424614023376	4.70698487897644e-15	0.00619517704741782	0.0187430824923992	6.1085692544834e-11	0	1	1	1	1	1	1	1	0	1	1
TanjilG_29228	OIW21095	transcription factor MYB108-like isoform X1	Scaffold_71_5	3028	4429	1106.89	1.8533	3.06433	2.36662	2.90357	4.34724	2.7965	3.18669	5.76688	2.10868	3.55213	6.4363	0.0713152554867325	0.000200639263978972	0.0334716572923292	0.000989092418038951	9.8143327429901e-09	0.065472755259466	4.04158223659335e-05	4.4595025145289e-20	0.00222852396870268	0.000109507431814539	5.3237331340623e-16	0	1	1	1	1	1	1	1	0	1	1
TanjilG_30383	OIV91161	hypothetical protein TanjilG_28795	LG20	2520242	2523413	347.184	2.59041	2.6862	3.29561	4.21371	4.32404	3.38363	2.71149	6.36695	1.79971	3.65769	7.54315	0.0529695625488999	0.0345436975939934	0.0225866142652177	0.000443247392784354	7.0926684559259e-05	0.365449170855485	0.00497138981315118	6.09784461298079e-15	0.0062325708010793	0.0200192164733794	7.19525766026877e-11	0	1	1	1	1	1	1	1	0	1	1
TanjilG_31528	OIW18388	stress-induced protein SAM22-like	LG01	23410966	23411807	1445.83	2.60538	4.87306	3.41767	3.55814	4.52863	4.47856	4.21949	6.11227	2.19211	4.20615	5.66561	0.0537169266604094	4.48617443216462e-06	0.0165065846319049	0.00456758068286313	2.43775907464347e-05	0.213987168752435	0.000537551793200992	4.44878492288318e-09	0.000136248489203563	0.000133720789748461	4.32967435138145e-10	0	1	1	1	1	1	1	1	0	1	1
TanjilG_31536	OIW18396	stress-induced protein SAM22-like	LG01	23341714	23342490	52704.2	2.1572	3.38007	2.01935	2.81846	3.67212	0.655406	2.16207	3.20431	0.397379	2.04139	2.62885	0.000750745705439668	3.46603345155487e-10	0.00407173769639245	6.33125685037465e-07	3.61428088382125e-12	0.874486703182971	0.00268165881671499	4.40001264006086e-07	0.513976506221409	0.000266489181255988	6.69340534587505e-10	1	1	1	1	1	0	1	1	0	1	1
TanjilG_00174	OIV97145	probable WRKY transcription factor 61	LG15	7732060	7737065	37.5702	3.48293	3.90289	2.10513	7.56431	4.35432	3.30573	3.9498	4.79236	2.91139	3.18355	7.78988	0.0177992265971674	0.0060740349113927	0.493767184527214	0.000144655881957042	0.00195423543325173	0.141084640792482	0.113740118567531	8.73879046737279e-07	0.0382357699405826	0.00318802362157013	0.000120618944998185	1	1	0	1	1	1	1	1	0	0	1
TanjilG_00438	OIW10500	G-type lectin S-receptor-like serine/threonine-protein kinase B120 isoform X1	LG06	6178469	6182291	351.437	2.29853	4.41962	1.2011	4.09379	3.03484	2.34086	2.22582	5.64521	1.34162	2.22801	5.59772	0.033388807491003	2.32855968161023e-07	0.662925182443667	6.829831119802e-06	0.000966834860303686	0.44695077034715	0.102941808613512	6.24440144898006e-13	0.0300848939290401	0.0212295257828369	6.51532794690343e-13	1	1	0	1	1	1	1	1	0	0	1
TanjilG_00461	OIV96879	WRKY transcription factor 55-like isoform X2	LG15	12888143	12891068	114.379	2.75294	3.81954	1.73238	1.75954	3.66266	3.60706	3.59034	3.18688	1.1714	3.42092	4.88667	0.0271012549287515	0.000190863938533975	0.46210255658473	0.327984783799881	0.000250429652996615	0.642612625173836	0.0044278175340628	4.73528664269703e-08	0.00102511133003773	0.000446828466112558	0.000945559720981366	1	1	0	0	1	1	1	1	0	1	1
TanjilG_00767	OIW04207	probable WRKY transcription factor 71	LG09	21287911	21289442	195.884	1.84476	2.88022	1.62042	2.48132	3.4559	2.91677	2.29371	4.41476	1.05189	2.50809	5.30378	0.0879431227648358	0.000962658022201705	0.344372413103456	0.013060079224068	2.44892095116266e-05	0.615784608923392	0.0268434256542302	1.29203797455753e-12	0.00276729418655392	0.00986724848835405	4.00673481731984e-09	0	1	0	1	1	1	1	1	0	1	1
TanjilG_01939	OIV91321	basic 7S globulin-like	LG20	1315241	1316548	2483.92	1.98988	3.2368	2.20868	3.12963	4.05633	1.12801	2.76925	5.30094	0.894803	2.62857	5.26565	0.0117851255142218	9.42076291841796e-07	0.0105274493281738	6.04198863755919e-06	2.53065895600341e-10	0.549669468543621	0.000458782457224405	1.01928506334891e-19	0.244648136108818	4.56606287738008e-05	1.3913973682176e-19	0	1	1	1	1	0	1	1	0	1	1
TanjilG_02759	OIW05052	inorganic phosphate transporter 1-4-like isoform X1	LG09	7290981	7292627	745.196	2.5542	2.41459	3.76168	2.78626	4.31215	2.49666	0.895164	3.95192	0.805412	1.18817	2.7446	0.00957645476048001	0.011004172704043	4.83922415037286e-05	0.00483071312515245	1.02908846636771e-07	0.750650313344075	0.821679960345872	0.0006384594576132	0.011665433355653	0.452585438730184	3.72549031924309e-07	1	1	1	1	1	1	0	1	0	0	1
TanjilG_03584	OIV97010	amino-acid permease BAT1 homolog	LG15	12000182	12003680	353.543	2.1383	2.39775	1.38896	2.77198	2.97976	1.82619	3.45764	4.09972	0.744105	2.541	4.00563	0.0040161958785544	0.000416420313216191	0.253642424136681	3.50240831389612e-05	1.92233868720107e-06	0.650230492602536	0.000523056300162812	2.46587384685074e-12	0.0193046515809513	9.2299634882225e-08	2.03809328793352e-12	1	1	0	1	1	0	1	1	0	1	1
TanjilG_03836	OIW06211	hypothetical protein MtrunA17_Chr4g0013451	LG08	18688609	18689877	80443.5	1.56295	2.17577	2.32166	3.82846	2.62638	-0.183209	2.51471	4.54528	1.63691	2.28805	4.6552	0.127686472910883	0.0117638656381758	0.0248830658666819	3.05932407356433e-07	0.00101406793217458	0.180092321597091	0.0241980575121402	4.97290867531959e-12	0.984380610930902	0.00159814778087854	3.23741999029319e-11	0	1	1	1	1	0	1	1	0	1	1
TanjilG_03934	OIW01796	Glu S.griseus protease inhibitor	LG11	17980151	17980502	4769.34	2.7457	8.89283	4.34968	25.8132	7.08257	5.12346	7.04799	9.14478	5.00148	4.09298	9.02953	0.299832739637827	3.89680533549335e-07	0.130060070237763	4.30539575457115e-40	6.50949525530347e-05	0.041604383152307	0.188084359618907	1.174381352553e-08	0.0172809892498864	0.000113658397236373	1.42661634822053e-08	0	1	0	1	1	1	1	1	1	0	1
TanjilG_04690	OIW12526	receptor-like protein 12	LG04	26995053	26998250	923.214	1.38883	3.2256	2.88372	2.66157	4.01582	2.85172	3.33864	3.61948	0.050366	1.94109	3.95975	0.249014218220918	0.000144166218262204	0.00475811395786203	0.00580099117127369	4.52800721009294e-07	1	0.170467590552144	1.10589503420927e-07	0.0025823946213679	8.29203748584531e-05	2.63733285000736e-06	0	1	1	1	1	1	1	1	0	0	1
TanjilG_04706	OIW12542	acidic endochitinase	LG04	26910728	26911808	24987.2	1.94472	4.96398	3.20981	3.39162	4.1159	1.73865	3.08342	6.99055	1.66948	3.10744	7.57164	0.141745372876409	1.41256033991367e-07	0.0101780258361082	0.00186101984840405	1.84387267633044e-05	0.356853368798656	0.0120872584840884	4.36523694002696e-19	0.213325709300863	0.00262570964662803	5.40806156986632e-16	0	1	1	1	1	0	1	1	0	1	1
TanjilG_05123	OIV96283	endochitinase A2	LG15	20882529	20887396	42161.2	1.43056	3.8173	3.17406	1.58643	2.45395	2.47872	2.85399	6.80688	1.91622	2.33395	6.21424	0.190296226815181	4.58623815812703e-07	0.000379753889992814	0.198446109169467	0.00369289475109783	0.0934524658255862	0.02428607924533	4.4595025145289e-20	0.00608517386582722	0.000421833519031655	1.10819751941218e-23	0	1	1	0	1	1	1	1	0	1	1
TanjilG_06393	OIW19084	dirigent protein 19-like	LG01	13807304	13807864	1088.06	1.46903	2.72041	1.96253	2.68232	3.91487	2.56355	2.38553	3.86228	0.939703	3.14958	3.5704	0.165465398415437	0.000795028738216287	0.106369508314483	0.00203272270805243	1.08009969222988e-07	0.612997532501987	0.000222487428747643	3.05917474539819e-07	0.00386550863565845	0.003293259723649	4.38973405669307e-08	0	1	0	1	1	1	1	1	0	1	1
TanjilG_06960	OIW19505	acidic mammalian chitinase-like	LG01	2118059	2119780	5624.91	1.5118	4.0326	2.61053	2.72487	2.74399	0.556788	2.30972	5.17779	0.930702	2.7005	7.15938	0.136882403071984	1.91983353629847e-08	0.00461366969134796	0.000949205298653669	0.000371842016369342	0.607443415155083	0.00243108458197122	3.71192554668193e-28	0.739358704353618	0.00354312307339062	7.96378857459085e-15	0	1	1	1	1	0	1	1	0	1	1
TanjilG_07106	OIV97354	probable serine/threonine-protein kinase PBL8	LG15	1913142	1915424	990.726	1.63117	3.07042	2.07248	4.56194	5.32874	2.00436	3.25421	5.51185	1.38842	2.97296	6.02039	0.0886897578463599	3.35465844964776e-05	0.0501004394626213	7.05628109049139e-11	3.26293071847011e-15	0.281281043240498	0.00027185259201805	5.05233058472088e-21	0.0252985281098919	1.09389043318027e-05	3.08633882638861e-17	0	1	0	1	1	1	1	1	0	1	1
TanjilG_07160	OIW01865	hypothetical protein TanjilG_07160	LG11	15706166	15711519	143.058	1.41048	2.42643	1.36128	2.66827	3.65543	0.583607	2.03244	5.58486	2.94303	2.97389	4.55998	0.29034950820038	0.0170986839780938	0.568089632503506	0.0152693235571589	5.9508649848338e-05	0.0144907819459125	0.00645500413652969	1.02280667439526e-08	0.784731898516961	0.0390538682567716	1.33099523155907e-11	0	1	0	1	1	0	1	1	1	1	1
TanjilG_08158	OIW15582	exocyst complex component EXO70A1-like	LG03	3960303	3962183	131.703	4.3666	5.60575	2.7132	2.56046	4.71245	2.28147	3.19197	4.74921	2.05897	4.50783	6.44811	3.66043344353168e-05	2.85560514175123e-08	0.0579179299375729	0.0480887696054441	1.58265609080079e-06	0.196735977077655	0.000118903083566887	8.06538042812533e-14	0.0660725075928919	0.00172677256026582	1.05206192313179e-07	1	1	0	1	1	0	1	1	0	1	1
TanjilG_08369	OIW07254	myb-related protein Myb4-like	LG08	2772835	2775591	411.096	1.65921	3.12595	2.97005	2.0982	4.44789	3.529	2.15633	4.16037	0.731058	2.62378	4.34163	0.196034739088541	0.00132133554816187	0.0131211629409686	0.115804980032867	4.72146807920986e-07	0.828160260913853	0.0396082691280241	1.78711673372614e-07	0.000518002428736543	0.0352338443766516	9.79268522491109e-07	0	1	1	0	1	1	1	1	0	1	1
TanjilG_09682	OIW00713	glutamate decarboxylase 1	LG12	8963595	8967087	350.95	4.17635	4.24901	4.7926	-0.0371001	5.94303	4.28148	5.67457	6.41985	3.05453	2.80041	8.07905	0.036132692998686	0.0256140659159213	0.0332839772589257	1	0.00115914282146965	0.270491932674981	0.626905368827664	1.83210121373164e-08	0.0360438840912589	0.000779198632473985	3.02648559328958e-05	1	1	1	0	1	1	1	1	0	0	1
TanjilG_10025	OIW00947	pectinesterase 2	LG12	1866231	1869101	3525.92	3.27066	7.54559	3.37262	11.068	5.6832	3.8234	3.7368	9.74794	3.10555	4.37196	9.02803	0.103400736201765	4.36438693011685e-07	0.226793169958876	2.69341635676772e-11	0.000275464599108067	0.218384512008311	0.0374489500579505	2.4776789572235e-11	0.0473702041549878	0.0251580577196435	1.32000817715936e-12	0	1	0	1	1	1	1	1	0	1	1
TanjilG_10302	OIW19015	hypothetical protein TanjilG_10302	Scaffold_2_257	26502	26738	89.4901	15.4121	42.7342	3.12779	38.339	40.7649	36.794	5.38542	7.9704	2.71465	38.368	9.41513	6.63844539925428e-05	9.23757445684543e-47	0.855899028060534	1.84663772270269e-34	2.49840949607173e-41	0.84456962011888	5.49798864584221e-36	0.00342955129079075	2.31950960198399e-30	0.179438656490147	0.0290848046830993	1	1	0	1	1	1	0	1	0	1	1
TanjilG_10524	OIV92314	heat stress transcription factor B-3-like	LG19	2961714	2964077	2146.1	1.90232	1.99099	2.43334	5.69292	4.4265	2.37155	2.64334	4.25775	1.18448	2.30429	3.85865	0.0676396589341248	0.0432964965809251	0.0301596723905127	7.20452166266603e-14	1.00145472175265e-08	0.48835974873038	0.0411504817064636	1.59604014310031e-07	0.0145538148983386	0.00192795141116864	9.13906675898757e-09	0	0	1	1	1	1	1	1	0	1	1
TanjilG_10800	OIW21777	PREDICTED: uncharacterized protein LOC109340574	Scaffold_203_3	6024	6272	63.398	4.42097	3.10756	4.63687	7.21923	7.57414	4.25422	4.35954	9.98725	4.32863	4.93928	8.26	0.0201945930053637	0.131881697102862	0.0934862654736874	0.00272031014536342	3.6790101107725e-05	0.0833252559858097	0.0469500846394492	2.76068023872188e-07	0.0270557991256958	0.0141998561088721	3.28067560496616e-07	1	0	0	1	1	1	1	1	0	1	1
TanjilG_11214	OIW02320	hydroquinone glucosyltransferase-like	LG11	5548488	5549936	394.865	2.99802	5.13305	2.74055	0.998136	4.48201	6.17733	3.61934	8.91345	7.52367	7.28572	9.88572	0.16264621085485	0.0021465576367758	0.461555496746114	0.915570575349653	0.0139662149460444	0.00129682653412343	0.000222487428747643	3.02594829612832e-12	0.00173170517704104	0.0368249442278906	7.31663749485842e-10	0	1	0	0	1	1	1	1	1	1	1
TanjilG_12351	OIV97594	endoglucanase 2-like	LG14	15888136	15891618	39.702	2.78929	3.08337	1.4969	2.49822	1.95253	3.93192	2.39585	2.90693	2.40955	2.83986	2.80777	0.00366082873575125	0.000979090773512966	0.511835213830328	0.110746649911712	0.114870670021677	0.0411658998497482	0.00819018507933411	0.00134461153268695	7.60367527773374e-06	0.00635080610095334	0.000424693766455244	1	1	0	0	0	1	1	1	1	1	1
TanjilG_13076	OIV96144	polyphenol oxidase, chloroplastic-like	LG16	979875	981668	776.96	4.7961	4.68502	3.6842	6.42436	7.50005	1.83539	3.9046	6.11847	6.3572	4.38684	8.77111	0.0323423831666172	0.0218279655998525	0.278752006527212	0.00206246572859332	0.000108988282102257	0.00534818863486558	0.113452157378904	2.63860869055998e-08	0.565283228622459	0.0459459788655996	0.000313885957907489	1	1	0	1	1	0	1	1	1	0	1
TanjilG_13623	OIW02986	lysine histidine transporter 1-like	LG10	15894282	15896765	865.146	1.40792	2.80432	1.78142	2.7205	3.93502	2.07053	2.34565	4.28716	1.14294	2.72471	4.12568	0.0923870952146199	1.13019623729787e-05	0.0573372404151037	4.13726682085144e-05	6.72775320520968e-11	0.325290563768174	0.000108421616814963	2.68226819936953e-13	0.00514539412270326	0.000424093210843454	5.33996595088317e-14	0	1	0	1	1	1	1	1	0	1	1
TanjilG_14593	OIW02070	BON1-associated protein 2-like	LG11	9304510	9305019	52.3005	3.81208	5.57485	1.5075	1.09634	7.83705	5.44686	5.35838	5.52716	1.72881	5.5843	4.87564	0.0407457887753144	0.00075054210974304	0.829039319515583	0.86679383488637	2.84430891319694e-05	0.643861703079448	0.0362661560028495	0.000461293994970882	0.00118742595666614	0.000639356697200852	0.00035854205968806	1	1	0	0	1	1	1	1	0	1	1
TanjilG_14990	OIW06345	PAR1 protein	LG08	14234086	14235823	10505.8	1.86797	4.20551	3.06494	4.7404	5.20969	3.62123	3.95116	6.20752	0.31042	2.50299	6.52816	0.191901768425638	4.32625786975086e-05	0.0283489149337091	3.59658461649159e-06	7.72008843739258e-08	1	0.126033178966063	3.54555310521546e-13	0.00171683682891466	0.000170476660198037	1.13093716500874e-11	0	1	1	1	1	1	1	1	0	0	1
TanjilG_15236	OIW01911	PREDICTED: uncharacterized protein LOC109360098	LG11	14032836	14034589	433.277	3.22032	10.1404	9.52301	7.20059	6.19048	5.85926	6.55815	14.811	1.66279	3.29276	12.8463	0.368618547030992	0.000303501111315201	0.00280241885080362	0.0258271834148485	0.0241533321697041	0.862703276886022	0.821152374340647	1.51989788534642e-07	0.0410431346693686	0.0100904874265794	1.6054370538592e-09	0	1	1	1	1	1	1	1	0	0	1
TanjilG_15237	OIW01912	PREDICTED: uncharacterized protein LOC109360099	LG11	14041692	14042910	251.099	3.86401	6.7634	24.7025	22.4509	7.00232	7.64916	7.96497	28.1163	2.61242	3.45126	25.7779	0.293671185264603	0.0227390041355092	2.0026945435718e-22	9.18208190124804e-19	0.019991963656589	0.708248798976659	0.841107358463434	2.78772189383747e-25	0.00963872569742556	0.006213828364611	3.333039359565e-30	0	1	1	1	1	1	1	1	0	0	1
TanjilG_15504	OIV90771	1-aminocyclopropane-1-carboxylate oxidase homolog 1-like	LG20	6070508	6072747	121.744	2.10455	4.05954	3.37587	6.52848	5.66148	1.59356	4.08218	6.33256	2.48758	3.62221	6.09799	0.212941355246544	0.00153454476074307	0.049203996314322	1.48567283236229e-05	1.65434317398019e-06	0.279110689204165	0.0254117811160327	2.04172141740242e-08	0.405388326281421	0.00114463220293087	9.50465307866035e-09	0	1	1	1	1	0	1	1	0	1	1
TanjilG_15542	OIV90809	PREDICTED: uncharacterized protein LOC109336452	LG20	5682198	5683930	1462.24	3.94934	4.2809	2.47125	3.70891	4.8493	2.20064	3.30106	5.40253	2.40516	3.2298	5.96878	0.000270402595077084	1.13019623729787e-05	0.113337812606238	0.000465761020856052	2.51027342384012e-07	0.0974364643849139	0.00776757137807434	5.80050741298686e-12	0.0882485896072306	0.00120439312322593	1.30218575198367e-09	1	1	0	1	1	0	1	1	0	1	1
TanjilG_16385	OIW08804	isoflavone 2'-hydroxylase-like	LG07	245794	248128	1679.07	1.80281	5.82299	3.89069	3.59198	4.33666	1.94574	4.21565	7.96461	1.02226	3.08814	7.24546	0.112001612338529	9.60444232891664e-14	2.49272164975773e-05	4.48198140650741e-05	7.61812264795566e-08	0.626610012244277	0.00182491275202465	5.46915117178126e-23	0.0781821603548508	6.63067021556388e-07	5.00820755133903e-27	0	1	1	1	1	0	1	1	0	1	1
TanjilG_16841	OIW19313	thaumatin-like protein 1b	Scaffold_3_147	9123	10010	55568.6	1.10628	5.40034	3.93319	3.54792	5.0553	0.207554	3.51758	8.60803	2.54628	3.35451	8.3211	0.573834895194035	9.36014856776706e-08	0.00169173963323454	0.00286420438973902	5.14376727039069e-07	0.103244688338198	0.011469303623248	7.08157947329738e-20	0.99906279822135	0.00126473874786266	9.97945894802977e-21	0	1	1	1	1	0	1	1	0	1	1
TanjilG_17585	OIV97401	cytokinin dehydrogenase 3-like	LG15	1542930	1547095	1137.08	4.7569	6.50874	2.55403	4.81625	5.55074	1.65569	4.53117	7.87443	3.61505	4.33081	9.55484	0.00143796459082256	2.38364879441227e-07	0.338943573313224	0.000622210616225875	1.3723096441575e-05	0.0681988360528125	0.00927535753093638	2.31660928445322e-16	0.433740243961224	0.000751756749832762	1.13093716500874e-11	1	1	0	1	1	0	1	1	0	1	1
TanjilG_17918	OIW13739	glucan endo-1,3-beta-glucosidase, basic isoform-like	LG04	8683838	8684770	4589.27	-1.25101	3.36567	1.21691	0.0045283	4.47983	3.24791	3.47386	5.49554	3.44298	4.30057	4.56551	0.480696665460443	0.00245738209521555	0.755381891254304	1	1.19027405763888e-05	0.00775183614893196	0.00016000657010248	1.3241656855001e-06	0.0069614906766729	0.00126263785963451	5.04225033975139e-09	0	1	0	0	1	1	1	1	1	1	1
TanjilG_17919	OIW13740	glucan endo-1,3-beta-glucosidase, basic isoform-like	LG04	8677134	8678135	5081.37	-1.25957	3.39571	1.23117	0.00598314	4.53104	3.20214	3.45792	5.49225	3.4343	4.33382	4.58256	0.479624603563154	0.00234965574196902	0.752262127750777	1	1.00503887207578e-05	0.00836290850732961	0.000158003471267302	1.38151579607347e-06	0.00835470775471327	0.0014198118403363	6.30301704832273e-09	0	1	0	0	1	1	1	1	1	1	1
TanjilG_18261	OIW09954	transcription factor MYB36-like	LG06	11718929	11720298	180.021	2.02569	2.99811	1.51146	2.4345	3.178	2.40824	2.20144	4.50074	2.10653	3.17669	6.33538	0.0883629242189637	0.00182258252911964	0.490431061436401	0.0343578491300304	0.000734931281193873	0.143771022000336	0.00326006775877801	3.65519395343112e-15	0.042617189337213	0.0281093376299223	9.43877222455217e-08	0	1	0	1	1	1	1	1	0	1	1
TanjilG_18767	OIV98483	endochitinase PR4	LG14	552397	553913	665.61	2.5237	5.17379	3.36907	6.22647	5.02839	4.13388	3.31222	7.90003	2.13456	3.87904	7.89619	0.142583532121598	7.1940289413909e-05	0.082935154979733	2.29044290024344e-06	9.87140564651885e-05	0.367207585039666	0.0209580833822877	4.99879311726916e-12	0.00495803715825915	0.0162264195838771	1.20821269460773e-11	0	1	0	1	1	1	1	1	0	1	1
TanjilG_19548	OIW06899	putative receptor-like protein kinase At4g00960	LG08	7667248	7670432	756.09	1.50409	2.20816	1.91201	2.96269	4.60935	3.03425	2.54225	3.85309	1.81985	3.84281	5.09353	0.19399627542395	0.0208964044119044	0.185053299424012	0.00127321867071652	3.61854351907718e-09	0.16081038398518	1.00147385485951e-05	2.91542455859493e-12	0.00100979393706789	0.00340613749257818	4.42918803308984e-07	0	1	0	1	1	1	1	1	0	1	1
TanjilG_19645	OIW11389	PREDICTED: syntaxin-121-like	LG05	23997518	23999456	286.018	0.820669	2.87715	1.02288	1.3024	3.44907	3.43133	3.12204	4.71211	3.25017	3.91779	5.60574	0.663829379930551	0.00367424288636234	0.784066798068372	0.528306773407716	0.000206920757304623	0.00474788816162028	0.000170556720535131	6.83270601139684e-12	0.0007665824349852	0.00109429090568141	1.59749188299946e-08	0	1	0	0	1	1	1	1	1	1	1
TanjilG_20161	OIW08060	heavy metal-associated isoprenylated plant protein 39-like	LG07	9591925	9592838	395.592	0.552608	2.85091	2.0036	3.23313	3.99012	3.49792	2.46307	2.89745	2.04325	3.54281	4.50944	0.846206027766687	0.00684151256843636	0.28599621601038	0.00303348879720195	2.44405398619751e-05	0.182271902678815	0.00129692312251148	2.10471895363313e-07	0.00100216176381513	0.016842917954757	0.00229676248173919	0	1	0	1	1	1	1	1	0	1	1
TanjilG_20462	OIW11313	UDP-glycosyltransferase 73C5-like	LG05	24734114	24735580	1926.17	1.70615	3.64119	2.13532	1.39166	5.4547	4.85298	3.85407	5.7283	4.28106	3.88148	8.05106	0.381996955827367	0.00777123132204976	0.468722022273624	0.6928806659819	5.85197110668997e-06	0.00474788816162028	0.0144513841938156	1.11272868407064e-13	0.000362401157361879	0.00297440357951941	4.76546398796414e-07	0	1	0	0	1	1	1	1	1	1	1
TanjilG_21259	OIW14119	NDR1/HIN1-Like protein 3-like	LG04	4096762	4097544	978.87	3.18393	4.72895	2.71169	5.37512	4.4563	1.99201	3.52423	6.07923	1.99707	3.45788	6.89401	0.00800956305305303	3.04061274612476e-06	0.082935154979733	9.64797503482112e-08	9.10157552382871e-06	0.254998705906543	0.00570589241836569	2.18093965678642e-14	0.158712263304784	0.000949359975890015	4.64025613137018e-11	1	1	0	1	1	0	1	1	0	1	1
TanjilG_21406	OIW14266	isoflavone 2'-hydroxylase-like	LG04	1339573	1341270	8490.01	1.37728	2.30116	2.73139	1.04203	5.4651	3.43413	2.20365	4.10576	2.15239	3.13979	5.89371	0.237925845532083	0.0119106273299395	0.00676744768262896	0.606210284747918	1.50703423366792e-13	0.0585747487712777	0.000564346774748139	6.87416501464374e-17	0.000103867410292624	0.0111800017017195	2.64830996008442e-08	0	1	1	0	1	1	1	1	0	1	1
TanjilG_21546	OIV95156	Calmodulin-like protein 8	LG16	18254311	18254936	235.589	2.44364	3.59357	1.8637	3.99644	5.38733	2.97638	2.76794	5.06184	1.15576	3.22467	4.44929	0.0541100233048128	0.000395457537749985	0.372233242004534	0.000121273690553069	2.2139347460776e-08	0.665427495882995	0.00905829937706133	8.46071213972431e-07	0.00936357187724274	0.00763271573947512	1.76456249451059e-08	0	1	0	1	1	1	1	1	0	1	1
TanjilG_21569	OIV95179	anthranilate N-methyltransferase-like	LG16	18452959	18456089	970.061	2.94886	5.01164	2.76892	3.97267	4.71787	-0.485681	1.73037	5.96883	1.80267	4.16882	6.25379	0.00196911779779136	1.11876179283206e-11	0.00407173769639245	3.48534074225738e-07	2.67670699730639e-10	0.160960230589215	1.25219355421122e-07	8.82933598421414e-20	0.807430794908728	0.0501887649290545	1.25975119529648e-17	1	1	1	1	1	0	0	1	0	1	1
TanjilG_22068	OIV94871	lysine histidine transporter-like 8	LG17	1057998	1061151	513.757	2.64846	4.00835	2.6319	1.51826	3.12269	3.10798	2.23195	4.2523	2.96605	2.16371	6.24933	0.0208201389488611	2.59938978098511e-05	0.0559755764913673	0.42068966909678	0.00188470324337252	0.0156647301479969	0.204735625415269	5.30475488466644e-14	0.00476566431041301	0.0335126050165188	1.26636740634083e-06	1	1	0	0	1	1	1	1	1	0	1
TanjilG_22247	OIW13456	phospholipid-transporting ATPase 1-like	LG04	10996317	11000189	82.8771	2.93487	3.78504	2.28005	3.50364	5.06453	1.76725	2.50218	4.62345	4.0895	2.41635	6.50737	0.0401460651336207	0.00208055591713355	0.335262277853814	0.0212725775757044	8.16419042456698e-05	0.00979806044634064	0.319344840292268	5.18348679985605e-10	0.29427756931153	0.0499221775007871	1.5810304199259e-05	1	1	0	1	1	0	1	1	1	0	1
TanjilG_23836	OIV95605	wall-associated receptor kinase-like 20	LG16	8701697	8707789	2175.54	1.38091	3.32697	2.70642	3.96092	3.11094	2.34663	1.67448	4.15522	1.90263	2.90221	5.00787	0.279180975353904	0.00018093058669424	0.017921852916879	6.19707854408344e-06	0.000492024128256845	0.160495096051875	0.00593286133731489	5.75222751972332e-11	0.0258601762337394	0.0929515470170419	1.58290888747699e-07	0	1	1	1	1	1	0	1	0	1	1
TanjilG_24251	OIW00521	Putative glutathione S-transferase	LG12	12018066	12019315	1651.86	1.89534	4.79175	4.28517	3.05415	3.62187	3.01553	3.80709	6.02821	1.02836	4.10094	8.73197	0.288837948242084	0.000100442583234808	0.00363068629506685	0.057838865097528	0.00631823915824216	0.801170217479739	0.00559418235876285	1.15359227463545e-16	0.0480597489746266	0.00279923860015901	4.32887622024077e-08	0	1	1	0	1	1	1	1	0	1	1
TanjilG_24722	OIW12789	zinc finger protein ZAT11-like	LG04	24935418	24935906	91.5016	4.28071	5.81271	2.7828	8.36188	6.56239	2.66768	6.10888	7.6798	2.31342	8.06331	7.65104	0.00514233477780956	5.53257722006041e-05	0.26853063058791	2.57154805441029e-05	7.01585940520027e-06	0.331962932245544	0.000159828435978786	3.39329762881024e-10	0.12888842081563	0.000115817236466608	8.25469754159792e-09	1	1	0	1	1	0	1	1	0	1	1
TanjilG_24878	OIV98707	UDP-glycosyltransferase 74G1-like	LG13	14970077	14972502	377.537	7.51264	7.99445	3.40113	7.79882	6.29737	2.61617	1.18643	6.7823	5.69624	5.31281	9.0954	0.00312454328386905	0.000153127056301659	0.336856849799708	0.00163600414605234	0.006569522727336	0.0130450304117947	0.0159955490528174	1.4507887042205e-09	0.31724802868103	0.687979881909683	2.48222550186098e-05	1	1	0	1	1	0	0	1	1	1	1
TanjilG_25121	OIW14335	high affinity nitrate transporter 2.5	LG04	262143	264592	139.723	-0.694095	2.47595	0.5421	3.92211	2.73504	2.94908	2.70577	2.54923	0.875879	2.4493	4.42475	0.671034588099958	0.00300752621665462	0.935724297106522	4.43849530999378e-07	0.00108258560672219	0.670120450262597	0.0131540769856533	4.02012615904409e-10	0.000834260439438653	0.000718143194345351	0.000709448885471482	0	1	0	1	1	1	1	1	0	1	1
TanjilG_25233	OIW01125	FT-interacting protein 1-like isoform X1	LG11	35834501	35837642	310.894	1.07228	2.80135	1.22013	3.02375	3.51254	0.997045	2.97224	3.33236	2.11922	2.36506	3.36323	0.29814067952084	4.1332038521406e-05	0.423410014139732	9.6730080104518e-06	4.08006636973793e-08	0.0189671759578396	0.00410225650278243	3.02995500638117e-08	0.327676028189802	9.38328102447066e-06	4.79107443332726e-08	0	1	0	1	1	0	1	1	1	1	1
TanjilG_25691	OIV89170	thaumatin-like protein 1b	KV862357	69281	69979	21381.3	0.477394	4.87176	3.89582	2.92097	5.03076	0.298793	3.38662	8.41976	2.08612	3.54832	8.60759	0.912220764567197	3.42273703332222e-06	0.00249248063943689	0.0309004066637472	9.30116381482029e-07	0.257047611720933	0.00661318734466895	1.42100314404859e-20	0.970486541095103	0.00245995242973049	2.27077771907528e-19	0	1	1	1	1	0	1	1	0	1	1
TanjilG_26994	OIV95890	pathogenesis-related genes transcriptional activator PTI5-like	LG16	1292688	1293179	332.528	2.25009	3.0877	2.21991	2.55217	5.24724	3.32176	3.2943	5.26403	3.22646	3.38298	7.63003	0.0882382176320844	0.00574109553066384	0.239764939236861	0.0705091807233303	1.53398327196828e-07	0.014846533191878	0.00773335016253471	4.68067406463433e-17	0.00459920490766489	0.00209880884562576	1.50976034551098e-08	0	1	0	0	1	1	1	1	1	1	1
TanjilG_27955	OIW10204	hypothetical protein TanjilG_27955	LG06	7583622	7584270	131.862	3.77526	3.70162	0.602291	2.96778	5.24304	0.281022	3.44608	5.33913	7.94253	2.8661	6.81711	0.00171105836440177	0.000676999958224719	0.977585449231796	0.0244356052918304	5.88841160037492e-07	3.74886681564145e-05	0.066477147523556	3.12230104822094e-12	0.972297677975091	0.00168524287754224	4.41835446385003e-08	1	1	0	1	1	0	1	1	1	0	1
TanjilG_28026	OIW10275	hypothetical protein TanjilG_28026	LG06	8317779	8318471	63.2677	4.26102	6.68326	1.84931	6.53844	6.76036	3.3361	2.99741	6.86871	2.46618	3.55049	9.9597	0.0343675074067823	0.000246967014693469	0.655694947379399	0.00323747354236582	0.00089495636781112	0.35024462472272	0.0910653282210513	4.26738613033679e-10	0.0378075987395299	0.0374023083968628	7.37650521608403e-08	1	1	0	1	1	1	1	1	0	0	1
TanjilG_28794	OIW05329	G-type lectin S-receptor-like serine/threonine-protein kinase LECRK3	LG09	2491237	2494750	202.836	1.06117	2.44556	1.23725	2.34972	3.56396	1.91397	2.47377	2.81256	2.50544	3.09575	4.2078	0.408685765386774	0.00420327618122662	0.554405143162296	0.0136916111701543	3.91254086133075e-06	0.0153759925829481	0.000537551793200992	2.49551255964792e-09	0.0540209656544563	0.00267093709965098	0.000197526723575094	0	1	0	1	1	0	1	1	1	1	1
TanjilG_30445	OIV91223	zinc finger protein ZAT8-like	LG20	2021794	2022348	129.673	3.376	5.0759	2.97955	3.55151	5.01903	2.52704	4.36284	7.41914	1.70613	3.58591	7.2355	0.017818852627002	5.66750527043644e-05	0.110903148996814	0.0222645069622784	6.50949525530347e-05	0.499584375814673	0.0271683621095991	1.37658274438359e-11	0.0990306242973057	0.000360417307894878	3.03819564897997e-11	1	1	0	1	1	0	1	1	0	1	1
TanjilG_30543	OIW21185	naringenin 8-dimethylallyltransferase 2, chloroplastic-like	Scaffold_78_6	48675	61103	1047.86	2.6205	7.17849	4.17291	11.0414	8.07432	2.92711	3.51296	9.4153	3.1684	5.51585	9.11966	0.206660175769221	6.60047632377052e-07	0.049203996314322	3.23482351433314e-08	5.68772559294854e-08	0.176596256829617	0.00116623697926946	5.03249366023527e-12	0.146504683210917	0.0301971842055513	1.00475718169064e-11	0	1	1	1	1	0	1	1	0	1	1
TanjilG_31142	OIV92223	PREDICTED: uncharacterized protein LOC109334700	LG19	4759466	4761907	4252.4	1.33093	4.11615	2.14166	3.63403	3.28354	2.59271	2.91029	5.79598	1.49473	2.50858	6.69645	0.321286838635337	1.83694961047756e-06	0.139027012054598	7.36360408983871e-05	0.000260854176917703	0.361048086922159	0.0389422671733761	2.45191281362342e-18	0.0131599138641501	0.00154440934257437	1.36196509893096e-13	0	1	0	1	1	1	1	1	0	1	1
TanjilG_31503	OIW18363	hypothetical protein TanjilG_31503	LG01	23675298	23675537	174.562	3.15593	3.10772	0.507022	2.99213	5.64985	2.4392	3.59264	4.82376	2.61432	3.28301	5.84747	0.00871194888448437	0.00589624839610431	0.996714482634652	0.0193425509547378	7.73873361186743e-09	0.0728348160039651	0.0126122379732148	1.43415375498486e-10	0.0603442046150342	0.000741336240115949	3.48308915794711e-07	1	1	0	1	1	0	1	1	0	1	1
TanjilG_31527	OIW18387	stress-induced protein SAM22-like	LG01	23419594	23420370	15889	2.15457	2.74019	1.74047	2.34173	3.35149	1.2879	2.21737	3.19703	1.22901	2.36574	3.2974	0.00147184058755782	3.7460309416516e-06	0.0410149584951399	0.000253518769014846	3.13383110928444e-09	0.213987168752435	0.000458782457224405	7.61018567879931e-10	0.108399421018786	0.000373782308572493	4.64892503846485e-09	1	1	0	1	1	0	1	1	0	1	1
TanjilG_31535	OIW18395	stress-induced protein SAM22-like	LG01	23345460	23346274	7196.88	2.43613	2.95936	1.74044	2.18632	3.58795	1.95386	2.66372	3.40492	1.95155	2.72057	3.68264	0.00147184058755782	1.20503619150825e-05	0.102366824293496	0.00573486035085776	2.63840403512555e-08	0.0346389383993783	0.000314754164607225	1.25404862783925e-09	0.0163991742674434	0.000137701315401623	4.32887622024077e-08	1	1	0	1	1	0	1	1	0	1	1
TanjilG_31863	OIW19986	caffeic acid 3-O-methyltransferase	Scaffold_9_22	83895	87699	902.483	0.405774	7.51626	7.35031	7.8799	9.02621	4.75847	11.7804	11.3576	0	8.20432	9.84123	0.992783508851695	0.00132561470345661	0.00869130993867474	0.011590241293972	0.000110569710769578	1	0.00271011080593959	4.77624679279342e-07	0.204370220646214	5.78325634818376e-06	8.98183361461866e-08	0	1	1	1	1	0	1	1	0	1	1
TanjilG_31893	OIW19996	VQ motif-containing protein 1	Scaffold_9_88	16903	17211	101.25	3.4259	3.85048	2.62897	4.53068	5.44774	0.379706	3.674	6.34744	2.2341	3.30043	5.49904	0.0162680550825357	0.000648820118836886	0.117747325778381	0.000272357637796466	3.4717050714708e-07	0.217864451750175	0.0210036850563243	5.45812696455299e-09	0.932611548833249	0.000744755740499559	1.16650504455595e-10	1	1	0	1	1	0	1	1	0	1	1
TanjilG_31975	OIW20046	MLO-like protein 6	Scaffold_9_172	4865	11415	829.35	2.0771	2.79949	1.1963	2.47433	2.89207	1.46535	2.50186	4.53038	1.02493	2.95386	2.74063	0.0202733152400809	0.000266723918347934	0.538078359348147	0.00375088052704496	0.00010981380134609	0.526476818930667	0.000370992873534546	7.57577736365167e-05	0.15014563417812	0.00120739814412778	1.13093716500874e-11	1	1	0	1	1	0	1	1	0	1	1
TanjilG_32808	OIW10068	protein SAR DEFICIENT 1-like	LG06	10235068	10238076	912.803	0.879546	3.71941	2.3305	3.87893	5.35596	4.20508	4.05921	3.32356	0.71731	3.06394	5.52503	0.686041354837362	0.00042499726539811	0.191305100038274	0.000384796796834698	2.33017133404655e-08	0.869633148770855	0.0222766186574831	9.98998751367126e-10	0.000157914847879441	9.28449323563886e-05	0.000802203778604032	0	1	0	1	1	1	1	1	0	1	1
TanjilG_00192	OIW17101	probable WRKY transcription factor 40 isoform X2	Scaffold_1_564	6694	8580	224.466	1.44822	4.10188	2.17402	5.34611	3.62132	1.4842	3.07826	3.91714	-0.817081	3.30968	6.73023	0.348573622691109	6.10368542153004e-05	0.245519328847922	1.38799277052234e-06	0.000477451258425515	0.816458304648912	0.00735110727531854	2.33066647392337e-13	0.330927496734102	0.00340613749257818	4.39970394660109e-05	0	1	0	1	1	0	1	1	0	1	1
TanjilG_00666	OIW04106	1-aminocyclopropane-1-carboxylate oxidase 1-like	LG09	20570765	20572773	2742.17	3.25794	4.0561	1.00735	3.61018	2.96331	1.54852	2.83634	5.72814	0.753034	1.632	2.29992	0.00118460543808825	4.03325312905607e-06	0.779824741428376	0.000115209461931294	0.00172626128038041	0.804503101244052	0.52386616163656	0.00972927512283468	0.227344552404902	0.00243182610681898	5.67251712820158e-13	1	1	0	1	1	0	1	1	0	0	1
TanjilG_02262	OIV92499	cysteine-rich and transmembrane domain-containing protein B-like isoform X1	LG19	720032	720813	282.187	2.80669	3.37847	2.51271	3.32642	4.13159	1.40887	3.75454	4.49925	1.40795	2.28064	6.04407	0.0364919015033461	0.00466143174474762	0.182127335103644	0.0122116631341476	0.000175699427678506	0.56666632064369	0.319344840292268	3.44106811656589e-10	0.422841123111353	0.000962951112169741	9.7579903772489e-06	1	1	0	1	1	0	1	1	0	0	1
TanjilG_02267	OIV92504	transcription factor JUNGBRUNNEN 1-like	LG19	671283	672931	103.107	3.04887	2.34943	1.75339	4.38512	3.26874	1.94477	3.12024	4.38907	1.1793	3.65404	3.86074	0.0156374404769783	0.0796680355340642	0.510977420718787	0.000391906710655732	0.0068335812675283	0.66495029158234	0.00357942257801973	0.000103527577992004	0.182843145020347	0.0045341836152483	1.47947221126082e-05	1	0	0	1	1	0	1	1	0	1	1
TanjilG_02604	OIW05131	UDP-glycosyltransferase 73C2	LG09	5868207	5869712	133.199	0.728386	2.13855	0.86421	1.61231	2.28643	0.991794	2.23861	4.07172	2.00024	2.23891	3.14566	0.6211940419826	0.0126459446027351	0.760701921794351	0.166034262189151	0.0215588321743395	0.0459983191596763	0.0210036850563243	1.58900432890079e-06	0.396833751970029	0.00785990657515556	1.96661202477824e-09	0	1	0	0	1	0	1	1	1	1	1
TanjilG_02606	OIW05133	UDP-glycosyltransferase 73C3-like	LG09	5875051	5876211	1071.69	2.55545	4.04798	1.55273	2.3885	3.48055	2.54639	3.4793	6.43507	1.9271	1.84535	6.01998	0.0421370939680639	8.69567948779814e-05	0.575076916658567	0.0950529755570754	0.00108017096802989	0.27316048187335	0.533315676385515	1.97979833012483e-11	0.045657444452601	0.000995529198231554	1.46011459648653e-12	1	1	0	0	1	1	1	1	0	0	1
TanjilG_05117	OIV96277	PREDICTED: uncharacterized protein LOC109327790	LG15	20859930	20861560	604.866	2.37486	3.41883	1.37229	2.00823	2.94339	2.54034	2.81949	4.62789	0.799041	2.3381	6.08065	0.0224530187751713	9.8907065574219e-05	0.545307355394998	0.100688828447452	0.00114811476303632	0.766262446502874	0.0600568117366531	9.28788099360221e-16	0.0127214731173595	0.00179132830503197	3.57745821696437e-09	1	1	0	0	1	1	1	1	0	0	1
TanjilG_05543	OIW10395	isoflavone synthase	LG06	6732977	6734473	11487.1	0.454461	2.78574	1.99301	1.94417	4.51763	3.00727	2.10558	4.13777	2.00633	2.62932	3.59643	0.825602362518417	0.000263574829683842	0.0727115309110392	0.043232507407868	4.81667355414147e-11	0.0511083260037252	0.00268165881671499	6.5337620190122e-08	0.000215280551138791	0.00745733023560051	5.75572899351484e-10	0	1	0	0	1	1	1	1	0	1	1
TanjilG_05559	OIW10411	heat stress transcription factor B-2a-like isoform X1	LG06	6592895	6595025	134.493	3.58336	3.53833	3.59714	1.73894	3.62026	3.32288	1.71701	4.05683	1.92158	1.7588	5.62912	0.00920397317079574	0.00684893394425464	0.0301596723905127	0.514018660014977	0.00815728741403773	0.389287210707608	0.781828794480222	1.81247372798973e-07	0.0209814236753802	0.256912148799041	0.000480559974683683	1	1	1	0	1	1	0	1	0	0	1
TanjilG_06316	OIW18232	PREDICTED: uncharacterized protein LOC109327124	LG01	25555578	25555922	802.33	1.40411	2.23453	2.29278	2.41629	2.91742	0.610652	2.34384	4.44528	0.616984	0.748373	3.72728	0.0978032708089835	0.00111913830059335	0.00371326333968617	0.00062294575501503	3.91254086133075e-06	0.75271813813787	0.933641650441637	7.30385851400501e-11	0.6275731541189	0.000479356425304922	9.43101802809836e-15	0	1	1	1	1	0	1	1	0	0	1
TanjilG_08982	OIV91570	non-specific lipid-transfer protein-like protein At5g64080	LG19	17664366	17666470	15.2413	-2.01677	20.7163	18.4088	0	17.2563	20.9633	21.0666	7.17696	17.6235	0	23.104	0.954905606300843	0.000954289893079381	0.0208814436325736	1	0.0108416221894081	0.0271796955634906	1	2.71009926725455e-05	0.00177391282794266	0.000650850937996968	0.331742666263526	0	1	1	0	1	1	1	0	1	0	1
TanjilG_10379	OIW01218	probable glutathione S-transferase	LG11	33744560	33745737	1843.34	2.66369	4.26435	3.7376	5.40923	5.31629	2.15867	3.13637	6.72103	1.9748	3.07478	7.40386	0.0676530189973532	0.000314863158206693	0.0105418653045886	2.31055530388758e-06	1.39428309249589e-06	0.35024462472272	0.0646966895254352	3.34811140353085e-13	0.17526965088872	0.0103197989402719	5.76650608069945e-11	0	1	1	1	1	0	1	1	0	0	1
TanjilG_10476	OIW01315	cysteine-rich repeat secretory protein 55 isoform X1	LG11	34922373	34923152	1444.23	0.826406	2.38934	2.23475	2.24932	0.582072	3.1547	2.49146	4.32979	0.121124	1.99297	3.33769	0.490241078458684	0.00109671761149233	0.0129879258780331	0.00527227542771149	0.750649340852011	1	0.0350146513561659	8.68789890763443e-08	1.75942309370251e-05	0.000564277944734875	2.88526073611167e-12	0	1	1	1	0	1	1	1	0	0	1
TanjilG_10807	OIW21784	transcription factor JUNGBRUNNEN 1-like isoform X1	Scaffold_203_33	58156	60370	139.148	4.14536	1.82279	0.784746	3.2322	4.33564	0.223853	2.92535	2.82803	1.43718	3.63505	2.83996	7.23378101017452e-05	0.100164300653002	0.866956285717893	0.000660923098231836	1.89229486262552e-07	0.387656586295113	0.000134188943609562	0.000532284864015664	0.976610753342468	0.00108406727694408	0.000778950315085114	1	0	0	1	1	0	1	1	0	1	1
TanjilG_10904	OIV90418	E3 ubiquitin-protein ligase PUB24-like	LG20	13813615	13814850	85.5261	2.89981	5.52778	2.35587	2.29265	3.98342	2.42598	2.93364	6.28301	2.01811	4.25255	6.77904	0.0498249860010356	0.000191388197580227	0.341397500576586	0.254627603984102	0.00275618859260938	0.358807196423722	0.00406430467155277	3.30834214987853e-10	0.122290601788862	0.025119693322014	9.58647961047702e-08	1	1	0	0	1	0	1	1	0	1	1
TanjilG_10941	OIW11739	hypothetical protein TanjilG_10941	LG05	17299844	17300035	80.3826	1.81978	3.3803	2.78392	3.15897	5.59952	3.35029	3.87413	4.55443	2.26481	4.40485	7.13022	0.392112213238841	0.0360519373468739	0.320775644548865	0.109367877174115	2.81988607188601e-05	0.377047232423341	0.0207952694067258	2.83051926244396e-08	0.0486925064011542	0.00863260725963048	0.000699229930098741	0	1	0	0	1	1	1	1	0	1	1
TanjilG_11612	OIW02019	LEAF RUST 10 DISEASE-RESISTANCE LOCUS RECEPTOR-LIKE PROTEIN KINASE-like 1.1 isoform X1	LG11	10562458	10565531	464.398	0.217428	2.38186	2.07937	4.21976	4.19438	3.35091	4.00883	2.73713	-0.435098	2.48338	5.36712	0.992783508851695	0.0360519373468739	0.239895433423765	1.48567283236229e-05	6.14925616461933e-06	0.963260861554627	0.0860504216271004	3.7828415159728e-10	0.00191388843409122	3.45201601534981e-05	0.00423427572302264	0	1	0	1	1	1	1	1	0	0	1
TanjilG_11850	OIW07723	calmodulin-like protein 8	LG07	12767100	12769168	140.422	2.33389	2.76188	2.8138	2.30577	3.95128	1.47569	3.29729	3.71401	1.64617	3.68456	6.35578	0.0529362562874801	0.0102874167255674	0.0434403206842656	0.0940074392473103	5.5192491608874e-05	0.34885415559561	0.000888654497813804	5.57810762171376e-14	0.304218195909087	0.00109032559530316	4.76938683474115e-05	0	1	1	0	1	0	1	1	0	1	1
TanjilG_12173	OIV98587	GDSL esterase/lipase At2g38180-like	LG13	16995899	17000844	743.625	-0.133011	3.27636	1.87889	7.92027	3.78727	1.15409	3.06547	9.05902	1.7324	3.19341	8.27677	0.992783508851695	0.0089565037301226	0.496461653114312	3.84761507532828e-10	0.00145564347457427	0.452762167350179	0.0382941502474248	5.17608951828932e-17	0.579129126127915	0.0106431117232557	6.60928276821472e-19	0	1	0	1	1	0	1	1	0	1	1
TanjilG_13187	OIW18435	5'-adenylylsulfate reductase 3, chloroplastic-like	LG01	20280235	20281895	487.697	2.06836	4.21322	2.66866	3.35236	3.46134	1.01226	2.10373	3.98397	1.68037	1.66872	6.45049	0.0786473409283744	4.53634435000498e-06	0.044353367716231	0.00172085414514464	0.000272818958794528	0.29974310666024	0.53581565551756	7.9512158365788e-16	0.531514046117221	0.0382417056661468	3.07512204013487e-06	0	1	1	1	1	0	1	1	0	0	1
TanjilG_13336	OIW18584	blue copper protein-like	LG01	21314129	21315588	1962.15	2.57292	3.27067	2.26641	5.56852	4.27976	2.96663	2.96446	6.49682	1.38252	2.97051	6.78435	0.0795831435997258	0.0109335388146631	0.335053137521693	1.38978909568312e-06	0.000242408240754	0.615557628643945	0.0799147169875555	1.77592673320143e-11	0.0356806873757484	0.016046537236852	3.05842575169873e-10	0	1	0	1	1	1	1	1	0	0	1
TanjilG_14262	OIW01079	cytochrome P450 82G1-like isoform X1	LG12	735308	738937	102.599	0.0265522	2.59773	0.440247	2.27775	3.84817	1.48519	3.17144	5.74218	1.16201	3.59043	6.35431	0.992783508851695	0.00424160693625302	0.987952170435947	0.0345973253071277	4.40895927185238e-05	0.57123874253168	0.000159828435978786	2.63797406837652e-13	0.224626383807283	0.000166079915205211	5.00354167082577e-14	0	1	0	1	1	0	1	1	0	1	1
TanjilG_14455	OIW07509	hypothetical protein TanjilG_14455	LG07	18561628	18561993	494.141	1.7004	3.83656	3.56718	3.65348	2.97939	2.01089	4.22464	4.35825	1.00088	2.10709	3.76715	0.220452163365991	0.000140570979895369	0.00259698185876506	0.000524417568005936	0.00523563938145804	0.719122312657404	0.273405316349741	2.95982247039882e-05	0.126497599283954	1.82575454035119e-05	1.3465122056938e-06	0	1	1	1	1	0	1	1	0	0	1
TanjilG_14590	OIW02067	BON1-associated protein 2-like	LG11	9269002	9269541	118.418	2.8489	2.91519	-2.11168	0.709072	5.28687	3.59176	3.18825	4.56039	-1.39449	2.73749	4.83123	0.0407457887753144	0.0276651531149072	0.376133119041135	0.911006426173459	2.04767462140268e-06	0.591279072389634	0.14392383746093	2.36273299667898e-06	0.00535137505624084	0.0077233663775779	1.97383180252059e-05	1	1	0	0	1	1	1	1	0	0	1
TanjilG_14845	OIV98256	hypothetical protein TanjilG_14845	LG14	4175118	4176531	931.667	3.17485	5.32515	3.20407	5.31495	4.94657	4.25469	4.77922	7.95691	4.24348	2.52626	8.5102	0.147129813720276	0.00229709306172924	0.336753992938773	0.00456535014473642	0.00523563938145804	0.07239444100403	0.725084801756665	4.44878492288318e-09	0.0343709114554961	0.00542669012378189	8.65314227629762e-08	0	1	0	1	1	1	1	1	0	0	1
TanjilG_15012	OIW06367	heavy metal-associated isoprenylated plant protein 39-like	LG08	14754249	14755355	434.076	0.224857	2.61482	0.479454	1.95013	4.46347	2.5995	2.97947	2.69162	-0.303834	2.98781	3.95664	0.992783508851695	0.0136976889886247	0.994052311601807	0.177833247379592	6.95413638044927e-07	1	0.0121156335777915	3.94466190820313e-06	0.0212290820427258	0.00238669360725422	0.00414859990606446	0	1	0	0	1	1	1	1	0	1	1
TanjilG_15020	OIW06375	receptor-like protein 12	LG08	14868622	14868831	72.5559	1.79075	3.33013	1.78245	2.43532	2.97933	3.56557	3.8393	3.76814	0.696019	3.39075	3.49894	0.274766847552952	0.00346391677643097	0.500671736005634	0.096868679525303	0.0154763514266897	0.912094395286076	0.0350146513561659	0.000508963310019992	0.00319934698903381	0.000421833519031655	0.000251929572056861	0	1	0	0	1	1	1	1	0	1	1
TanjilG_15238	OIW01913	PREDICTED: uncharacterized protein LOC109360616	LG11	14075487	14076785	321.951	3.72796	6.0065	7.1672	4.92868	6.38254	6.56258	7.12881	11.2487	1.56306	3.5001	11.1098	0.191504248697271	0.0102927151584878	0.00676744768262896	0.10885967462769	0.00720395327779317	0.85146898866237	0.675389632565403	2.94959714401991e-07	0.00623145225776588	0.00150186397019004	2.83310687508568e-08	0	1	1	0	1	1	1	1	0	0	1
TanjilG_15906	OIW10534	metalloendoproteinase 2-MMP	LG06	5432955	5434091	571.687	1.94555	3.46651	2.01344	2.27773	4.5795	3.52761	2.86388	4.76229	2.06169	3.07039	6.21015	0.140049716404014	0.000689610043104965	0.289430580419558	0.0993817764057692	1.22349717272167e-06	0.188111905451306	0.0144513841938156	4.76367389809893e-13	0.00129673850840187	0.00542826853810816	9.66601021675632e-08	0	1	0	0	1	1	1	1	0	1	1
TanjilG_17149	OIV99339	MLO-like protein 6	LG13	2497457	2506937	69.973	5.54851	3.74744	2.52391	8.21115	5.37175	0.919294	3.52125	4.2162	2.94884	3.23895	3.68296	0.0154772234539373	0.00519466281132776	0.278271520611074	1.64399438386447e-05	0.000363677729026273	0.128890851551579	0.0587742175390193	0.00145409260559447	0.714424327318565	0.00455423383193854	0.000272668995880922	1	1	0	1	1	0	1	1	0	0	1
TanjilG_17469	OIV99659	tetraketide alpha-pyrone reductase 1-like	LG13	360040	363266	181.073	2.89502	3.29659	2.49013	3.77201	2.83944	2.53878	3.54306	6.64223	0.0421146	3.10543	5.94837	0.0445602126258247	0.0134402139252779	0.263454514510519	0.00757625517944863	0.04824441322806	1	0.148650955151726	1.94631551668766e-07	0.0986815649347917	0.0048101386516951	3.61618046904059e-10	1	1	0	1	1	0	1	1	0	0	1
TanjilG_17787	OIW17951	glutathione transferase GST 23-like	LG01	32210419	32211786	2058.38	1.37843	3.64835	2.61699	1.69562	3.01189	1.3629	2.54755	4.50154	1.66209	3.12625	5.96956	0.186503088339694	5.27395198455831e-07	0.0043530600638682	0.117395220197233	5.3875353073684e-05	0.155187651510703	0.000147803198985674	4.4595025145289e-20	0.199066036697767	0.00108451827588542	1.86398024208187e-11	0	1	1	0	1	0	1	1	0	1	1
TanjilG_18427	OIW19617	probable WRKY transcription factor 61	LG01	634987	638444	330.246	1.30939	2.56286	0.185447	2.17577	2.96712	1.79908	2.77581	3.82683	1.42955	2.93164	2.97246	0.240944856879362	0.00181321287876772	1	0.0216258576293415	0.000116321540948857	0.285479070788184	0.000782359115741499	2.43686502073261e-05	0.0657838161217462	0.000445996182774864	4.30095302261814e-08	0	1	0	1	1	0	1	1	0	1	1
TanjilG_18766	OIV98482	hypothetical protein TanjilG_19583	LG14	561364	561609	102.555	3.51967	7.06673	3.9163	4.11914	6.05496	5.06159	5.83394	8.76922	2.74389	3.76128	9.97495	0.0652857309920099	3.18559521812579e-05	0.103281090261398	0.0400377559310368	8.93364955951315e-05	0.369997087579531	0.144435833606947	1.12033031724873e-08	0.00869267197351534	0.00121508610451647	2.64617705583249e-08	0	1	0	1	1	1	1	1	0	0	1
TanjilG_19023	OIW16307	aspartyl protease family protein 2-like	LG02	23665853	23667523	360.103	2.40488	2.68903	0.681771	2.00695	2.6661	2.05605	2.55837	4.14848	-0.474847	1.78274	4.96221	0.0112095624835433	0.00152236245616039	0.886278576971513	0.0578371129895039	0.00143100438187244	0.9101653392128	0.218936227102897	1.07575001765115e-12	0.0378465624160804	0.00224345107706479	8.58637011636594e-09	1	1	0	0	1	1	1	1	0	0	1
TanjilG_19547	OIW06898	hypothetical protein TanjilG_19547	LG08	7660191	7666198	494.355	1.43958	2.61561	1.3752	2.02588	3.82415	1.89614	2.21305	3.61092	1.15086	3.05996	3.80875	0.0759193515008824	4.05628120239546e-05	0.239895433423765	0.0061671524756926	1.48113360647562e-10	0.310723839571549	3.0870876598973e-06	8.04007584067735e-12	0.0106488393070475	0.000808035288186238	2.30435218806471e-10	0	1	0	1	1	0	1	1	0	1	1
TanjilG_19583	OIV97036	hypothetical protein TanjilG_19583	LG15	11510744	11510989	102.555	3.51967	7.06673	3.9163	4.11914	6.05496	5.06159	5.83394	8.76922	2.74389	3.76128	9.97495	0.0652857309920099	3.18559521812579e-05	0.103281090261398	0.0400377559310368	8.93364955951315e-05	0.369997087579531	0.144435833606947	1.12033031724873e-08	0.00869267197351534	0.00121508610451647	2.64617705583249e-08	0	1	0	1	1	1	1	1	0	0	1
TanjilG_20333	OIW19208	hypothetical protein TanjilG_20333	LG01	7834949	7835179	8.63691	4.37912	18.8977	20.9797	0	17.1713	18.0619	7.46672	23.6209	16.0455	0	15.7082	0.552861028333663	7.27857844426874e-06	3.18582351105707e-06	1	8.50630631728083e-05	0.0023449781189508	1	0.00020220219118131	0.000108390048601575	0.137534077014752	6.78071397134658e-10	0	1	1	0	1	1	0	1	1	0	1
TanjilG_20463	OIW11314	protein DMR6-LIKE OXYGENASE 2-like	LG05	24725193	24728718	64.8688	3.21897	4.07614	1.72736	2.91779	3.50699	2.1826	2.57956	3.80384	2.55554	3.52729	6.03709	0.0283132454694765	0.00221819731504953	0.658403858001879	0.144771324936503	0.0223505989200367	0.170987817528092	0.0274458465827319	2.06057052862725e-06	0.167255561597523	0.0425162602126425	0.000755815824665082	1	1	0	0	1	0	1	1	0	1	1
TanjilG_20684	OIV93022	probable mannitol dehydrogenase	LG18	12831440	12833003	497.947	2.7146	6.52479	1.44177	3.71771	4.23888	3.94741	4.09949	6.39038	3.04427	4.02247	8.43706	0.160476877833586	4.47850904027771e-06	0.824823836471537	0.0468991932337925	0.00791201398255881	0.176596256829617	0.0512144283657641	3.45734532617342e-11	0.0218376728193548	0.00748843803050555	2.28414108925734e-06	0	1	0	1	1	1	1	1	0	0	1
TanjilG_20892	OIW00891	aspartate aminotransferase, mitochondrial-like isoform X1	LG12	3058449	3062754	482.96	3.41941	7.70072	7.81066	8.64925	7.61893	6.89402	4.94784	8.29389	4.94529	7.16584	10.0363	0.387822022413099	0.00496273586877338	0.0322303094740449	0.0106712291222939	0.0156145319798283	0.247067713649581	0.0865575468451198	8.6729820728369e-06	0.0446377833118916	0.0750383601555232	0.000541462605840814	0	1	1	1	1	1	0	1	0	0	1
TanjilG_21272	OIW14132	butyrate--CoA ligase AAE11, peroxisomal-like	LG04	3921308	3923543	476.598	0.415603	3.44342	2.17414	3.62441	5.579	5.86292	6.36976	2.99971	2.45507	3.43915	6.1888	0.967733447921274	0.0257139950337073	0.523443529842595	0.0326717070826854	1.99874031621755e-05	0.306717377626522	0.0875820535334461	3.31407365877227e-07	4.38612946442617e-05	1.44015695976351e-06	0.0311795220124259	0	1	0	1	1	1	1	1	0	0	1
TanjilG_21432	OIW14292	cationic peroxidase 1-like	LG04	893375	901127	352.509	3.48026	9.42835	11.1962	7.22856	9.56466	7.14949	6.23831	14.0037	1.97119	5.41299	13.1602	0.36932348394159	0.00212926026663252	0.000797661554629053	0.060509638892625	0.00161658860279423	0.832304022107536	0.309908910599194	4.13485057200642e-07	0.0165776498095962	0.0251264282952688	9.92092246060429e-08	0	1	1	0	1	1	1	1	0	0	1
TanjilG_22005	OIV94808	PREDICTED: uncharacterized protein LOC109330989	LG17	1577620	1577982	204.562	1.65985	2.71284	1.6528	2.58969	3.78974	1.08865	2.72186	4.31311	0.779242	3.10684	3.37904	0.0407457887753144	5.14291830360187e-05	0.113961858383391	0.000266936942074605	3.61854351907718e-09	0.632112525331622	1.21753423770664e-05	7.61053111229207e-09	0.257621322285986	6.79056673676347e-05	3.45723001519338e-13	0	1	0	1	1	0	1	1	0	1	1
TanjilG_22094	OIV94897	thaumatin-like protein 1	LG17	865243	865932	22051.9	0.909442	3.63861	2.5309	1.04757	2.53331	1.3911	2.97667	6.38215	2.84937	3.07936	6.92158	0.598500334430528	6.75972649382373e-05	0.0527247489054483	0.680659296821251	0.0139974324007756	0.0138753448511119	0.00476340179636551	1.04383291575172e-18	0.310515334065532	0.00156191391586166	1.24586580777384e-15	0	1	0	0	1	0	1	1	1	1	1
TanjilG_22102	OIV94905	probable serine/threonine-protein kinase At5g41260	LG17	791701	796913	197.02	2.11375	2.80975	0.75837	1.46495	2.17641	1.88423	2.81243	2.99141	1.74219	3.1807	3.59555	0.001899773360634	2.6201014240307e-06	0.714779895493999	0.0773147129353202	0.000497920607851291	0.0281096849051821	1.25219355421122e-07	1.43280056302058e-11	0.00608517386582722	3.0178340811118e-06	5.70807925155691e-08	1	1	0	0	1	0	1	1	0	1	1
TanjilG_22450	OIW17338	receptor protein kinase TMK1-like	LG02	1071220	1073198	390.632	0.040507	2.35332	0.588488	0.883732	2.08389	3.11639	1.99446	3.08496	2.30812	2.87883	3.30597	0.992783508851695	0.00470408205217362	0.916137941653687	0.680830898149544	0.0175641644918429	0.0232067377880603	0.00156490112345431	2.05583989910763e-06	0.000206517033349714	0.0159399088960427	1.73416505407058e-05	0	1	0	0	1	1	0	1	1	1	1
TanjilG_22923	OIW11116	RING-H2 finger protein ATL20-like	LG06	507048	508850	270.698	1.16066	2.69759	0.200473	2.49135	3.70577	1.5432	2.83974	3.03857	1.09859	2.33163	2.99918	0.223595724796544	4.32283629464966e-05	1	0.000415611655407961	4.43775380252575e-09	0.374591928180872	0.00255192249839371	4.44451401063636e-07	0.0635328869255969	1.47250239830404e-05	4.3046234487745e-07	0	1	0	1	1	0	1	1	0	1	1
TanjilG_23243	OIW05417	phenolic glucoside malonyltransferase 1	LG09	1442657	1444563	257.786	2.73408	5.81873	4.02236	4.72858	6.86822	4.38734	4.97362	10.2392	-0.118764	2.6374	8.44422	0.167688930589036	0.000134604078875519	0.0601445046781108	0.0101837742996683	7.09901689404503e-06	1	0.552300745066752	1.22571512007597e-10	0.012927404586174	0.00154884791956339	4.22083139212632e-09	0	1	0	1	1	1	1	1	0	0	1
TanjilG_23311	OIW06254	hypothetical protein MtrunA17_Chr6g0463461	LG08	17907259	17908437	23779.2	1.498	3.5227	0.983046	2.3333	2.07536	0.827781	2.10079	4.36754	0.878673	2.74112	5.36418	0.092373070817538	7.48166542398761e-08	0.618961152209966	0.00229287046199022	0.00549307559647215	0.576624353838627	0.000277261018583663	1.14162254653949e-19	0.471875037492495	0.0033139242839143	5.87818637287798e-13	0	1	0	1	1	0	1	1	0	1	1
TanjilG_24711	OIW12778	chalcone--flavonone isomerase 2-like	LG04	24999820	25001443	1038.17	2.01193	2.15349	2.20907	3.08718	4.61962	3.8532	1.57261	3.87449	2.15344	2.64623	5.66817	0.0801629347451779	0.046804015464002	0.127242414305509	0.00244462089635925	5.68772559294854e-08	0.103244688338198	0.026729159095398	5.6074696730198e-13	7.17060311984608e-05	0.138080656241406	3.21270379388229e-06	0	1	0	1	1	1	0	1	0	1	1
TanjilG_25823	OIV96998	hypothetical protein TanjilG_25823	LG15	12205832	12206563	66.6328	0.828222	2.89	1.11765	3.11155	4.31223	3.05241	2.75064	2.87652	-1.33366	2.50127	4.9725	0.785709334211858	0.0307936697399607	0.834509471877074	0.0286029455017541	0.000131554104540711	0.700436937897194	0.264040045466712	2.45361881160342e-06	0.0265396741526289	0.0255942549598189	0.0122091091643217	0	1	0	1	1	1	1	1	0	0	1
TanjilG_26199	OIV99861	class V chitinase-like	LG12	17544160	17545848	8651.54	2.11246	2.98305	2.45343	2.93729	2.78471	2.12803	2.41785	5.22906	1.65347	2.76764	7.59167	0.0778584191947374	0.00293979242409295	0.0840235989753365	0.00703092990781408	0.0066729483171194	0.327418821690721	0.0257720145348585	5.55666960219682e-21	0.0796200014475331	0.0162589334755369	4.68011595450941e-10	0	1	0	1	1	0	1	1	0	1	1
TanjilG_26484	OIW08195	alpha-amylase/subtilisin inhibitor-like	LG07	5284362	5284916	4783.4	3.40031	8.23766	4.3824	9.09131	6.68583	3.3312	5.69027	9.47462	2.79275	3.29151	8.83786	0.0544313293666943	1.01434562978028e-09	0.0181202491779872	1.62166351312376e-11	7.11755685923933e-07	0.237480794622479	0.171618706967268	8.021126314738e-13	0.0715145012697273	7.81183155275548e-05	3.01280678918643e-14	0	1	1	1	1	0	1	1	0	0	1
TanjilG_27094	OIV95990	Stress up-regulated Nod 19	LG16	2155326	2157088	957.896	1.97182	4.40116	2.93545	1.80128	2.99216	2.90931	2.86566	3.58573	1.28353	2.49864	4.9305	0.10126858773506	9.18714769130977e-07	0.0151104548809656	0.23341981184407	0.00216606602661343	0.513208928967142	0.0555939323148802	1.5598176168157e-09	0.00619517704741782	0.00296073625288241	3.85984332416089e-05	0	1	1	0	1	1	1	1	0	0	1
TanjilG_27109	OIV96005	peroxidase A2-like isoform X3	LG16	2281830	2284871	18880.6	2.60527	4.51595	4.09025	3.92758	2.48169	3.2012	3.17853	6.6456	1.26897	2.93703	8.7614	0.0676530189973532	6.10368542153004e-05	0.0024795768182409	0.00154575563378869	0.0859982626277355	0.659843907697866	0.0738157835477709	1.50222764117377e-19	0.016557429965739	0.00742428077953105	3.03035155257417e-11	0	1	1	1	0	1	1	1	0	0	1
TanjilG_27204	OIW19847	probable WRKY transcription factor 31	Scaffold_6_10	15699	18352	1994.73	1.73114	2.66093	1.60474	2.72871	4.20759	2.01505	2.50199	4.33966	0.263908	1.66821	3.91799	0.0326814257632132	6.75972649382373e-05	0.13806246389312	7.1530025703696e-05	5.21971119013631e-12	0.976593449655206	0.100491939548631	1.8316291599189e-11	0.008870053863654	0.000241276957703666	1.36196509893096e-13	0	1	0	1	1	1	1	1	0	0	1
TanjilG_27684	OIW10738	PREDICTED: uncharacterized protein LOC109349028	LG06	3599067	3600536	73.1188	3.85138	4.22894	2.3368	1.41692	3.32169	4.12166	2.90167	5.16219	1.69956	3.06029	6.20074	0.00461560726962847	0.00100013989831837	0.362549351145564	0.683256472173522	0.0180675896549467	0.496519932678902	0.135742332211141	2.15813686676649e-08	0.00346930841719602	0.0316226804847458	4.90583742805418e-06	1	1	0	0	1	1	1	1	0	0	1
TanjilG_28279	OIW11188	---NA---	LG05	24942840	24943355	6080.19	1.4037	2.82069	1.11923	2.60908	2.07784	1.21519	2.93448	3.85252	1.12605	2.32235	4.72187	0.132696725150618	5.54387570131656e-05	0.535921817099994	0.000469713597622604	0.006569522727336	0.396374491618609	0.00593286133731489	6.72909522783354e-15	0.22222203630963	3.00902126952531e-05	7.53162987647151e-10	0	1	0	1	1	0	1	1	0	1	1
TanjilG_29320	OIW04843	chalcone synthase 4-like	LG09	11246084	11247715	534.236	4.28238	4.69682	2.84581	2.5233	5.57746	4.95087	1.04262	5.07942	4.3587	3.84717	5.42193	0.0155027257950708	0.0033259349955745	0.382232425490788	0.387007946422562	0.000319976261037623	0.0275005328732909	0.0897325390512184	9.02658816773893e-05	0.00390002655290918	0.682454549760616	0.000424603129591851	1	1	0	0	1	1	0	1	1	0	1
TanjilG_29521	OIW02745	Peroxidase 4	LG11	1396661	1398260	295.69	1.10837	2.42505	3.70444	6.7602	2.68544	1.23738	1.68516	3.22572	0.28833	2.58853	5.42586	0.488342496029922	0.0183641762759543	0.00038003226233345	5.48702166441703e-13	0.00779452759876663	1	0.031820061373911	1.1105960243296e-11	0.382795390618747	0.10284252658291	0.000185279538731903	0	1	1	1	1	0	0	1	0	1	1
TanjilG_30052	OIW03776	beta-fructofuranosidase, cell wall isozyme-like	LG10	1889128	1891922	1405.42	2.10933	5.47315	4.06401	9.34775	6.31633	2.49179	4.03612	10.0026	1.19507	4.2083	8.28354	0.367599848522793	0.000546529202762628	0.068224897127127	3.33802831426959e-09	1.91355179632978e-05	0.827522148464562	0.0454085626454167	6.02201622270502e-10	0.254603495609912	0.0122969719596235	5.87818637287798e-13	0	1	0	1	1	0	1	1	0	1	1
TanjilG_30565	OIW14846	cytochrome P450 82C4	LG03	24533334	24535295	74.5069	4.46747	1.72084	3.07943	4.23977	2.85388	2.63668	1.31919	3.57024	1.099	1.38415	3.95958	6.35050252446775e-05	0.139671147199113	0.00448491557318662	7.3080742084206e-06	0.00279237440368091	0.684804236251161	0.724629133417376	8.54035225200549e-07	0.0225895868564979	0.227574227087359	1.2450451479015e-05	1	0	1	1	1	1	0	1	0	0	1
TanjilG_30946	OIW19970	sulfite exporter TauE/SafE family protein 4-like	Scaffold_8_292	40404	43497	111.652	1.39267	2.9733	0.800257	0.243557	3.63733	4.16441	3.1853	4.06132	5.60431	3.67605	6.54542	0.474446517854809	0.0286783221145181	0.939480028869668	1	0.00334682322655295	0.0101463612478058	0.0532469555009462	9.37444715702631e-10	0.00194647556672567	0.011254392820244	0.000261747069300207	0	1	0	0	1	1	1	1	1	0	1
TanjilG_31423	OIW18283	probable WRKY transcription factor 75	LG01	24786876	24787847	166.928	2.69114	5.11708	2.00067	4.49377	3.30127	3.76719	3.85009	7.77172	2.50214	3.17949	6.53029	0.129860549607325	0.0002486842991359	0.595993155746346	0.0127399790802858	0.0402646599417123	0.277740574004101	0.178975650376999	3.70818837310987e-08	0.0219019442714881	0.0143262867619211	2.64617705583249e-08	0	1	0	1	1	1	1	1	0	0	1
TanjilG_31525	OIW18385	pathogenesis-related protein STH-2-like	LG01	23438370	23439396	774.47	1.66293	3.25154	2.31814	1.81855	3.91682	3.03781	2.60329	4.86331	2.27478	3.79247	5.83014	0.293336693002716	0.00536514130068037	0.239895433423765	0.360467556641861	0.00031661456943129	0.180360647239694	0.00281142790615447	7.68654612383234e-10	0.0172809892498864	0.0256010694073224	8.08727979488452e-07	0	1	0	0	1	1	1	1	0	1	1
TanjilG_31530	OIW18390	stress-induced protein SAM22-like	LG01	23403659	23404471	30206.3	2.22783	3.2141	1.84378	2.48373	3.55236	0.985397	1.98476	3.2993	0.715339	2.30372	2.91759	0.000301371868549771	1.42851715908518e-09	0.0105228901307283	1.28170370536245e-05	6.93882443971935e-12	0.583675788168949	0.000188980146055417	6.39274254805462e-09	0.22254367052222	0.000698484897012271	6.19464298871637e-11	1	1	0	1	1	0	0	1	0	1	1
TanjilG_31532	OIW18392	stress-induced protein SAM22-like	LG01	23384884	23385615	5811.42	1.2061	2.26557	1.48311	1.76106	4.34776	2.96134	2.23386	2.79061	1.33252	2.61554	3.64103	0.27983123454393	0.00669777951737393	0.346555211424751	0.100587837180696	9.11726439396332e-10	0.332142458385678	0.00387880811844986	8.83954323141673e-08	0.000372043010619648	0.00510543157592496	0.00011902635371651	0	1	0	0	1	1	1	1	0	1	1
TanjilG_31533	OIW18393	stress-induced protein SAM22-like	LG01	23370381	23371112	6346.11	1.17581	2.25713	1.51305	1.81019	4.30771	3.02073	2.20484	2.74416	1.33559	2.65359	3.64965	0.30154711545639	0.00728921601324637	0.334358804470173	0.0878089956906571	1.61283257389833e-09	0.334696055641534	0.00341692358663457	9.72570255880071e-08	0.000299162517217408	0.00615324755040489	0.000178469529921518	0	1	0	0	1	1	1	1	0	1	1
TanjilG_31534	OIW18394	stress-induced protein SAM22-like	LG01	23350426	23351157	6436.51	1.17457	2.26031	1.51363	1.81011	4.29851	3.05412	2.32838	2.74004	1.32223	2.62173	3.6543	0.305178484056905	0.00748548030639983	0.336856849799708	0.0900417912594699	1.99787253958268e-09	0.344098816468426	0.0041909585528306	1.05055677801163e-07	0.000270524172966036	0.00365482979742787	0.000195698036547739	0	1	0	0	1	1	1	1	0	1	1
TanjilG_31538	OIW18398	stress-induced protein SAM22-like	LG01	23324806	23325535	43999.5	1.59561	3.83727	2.76466	1.73582	2.04407	0.951607	2.76203	4.67464	0.922457	2.91051	5.45917	0.124106040035658	3.15174864628008e-07	0.00328599842897537	0.124388054692468	0.0248618206298739	0.629280901627869	0.00102042778347508	6.79294325867515e-16	0.464148369943745	0.000600975316969884	1.49066377901972e-11	0	1	1	0	1	0	1	1	0	1	1
TanjilG_31627	OIW21298	NADPH-dependent aldehyde reductase-like protein, chloroplastic	Scaffold_88_45	9763	10575	414.137	2.78242	2.62725	0.682206	1.09386	3.35265	2.35749	3.01985	3.26753	1.81048	1.88492	5.75057	0.00777190956755129	0.00855489945992938	0.921103547189473	0.647646147772272	0.000254736608957452	0.220772918328929	0.319344840292268	3.05463527858735e-13	0.0333625563825321	0.00129097358081926	0.000157425626263829	1	1	0	0	1	1	1	1	0	0	1
TanjilG_31733	OIW13844	acyl-CoA--sterol O-acyltransferase 1-like	LG04	7774953	7776155	65.5204	2.62427	3.50052	2.66332	3.65431	3.61905	3.41468	3.68799	5.19182	1.13593	3.56271	7.69169	0.141858698257315	0.0244203322581959	0.334285296625062	0.0470034358850905	0.0302761927289666	0.8022145569439	0.10212902836106	7.87943326097264e-08	0.0433819194451617	0.0130035976688061	7.59695493967995e-05	0	1	0	1	1	1	1	1	0	0	1
TanjilG_31832	OIW03385	RING-H2 finger protein ATL40-like isoform X1	LG10	6405025	6405750	132.347	1.8604	2.25876	0.438243	2.7786	4.2307	1.86558	2.49871	4.11156	0.126526	3.15777	4.59832	0.0492103711026362	0.00700421459995764	0.974808795893366	0.000896555065524392	1.6627439958442e-08	1	0.000158003471267302	9.77777878943015e-12	0.0479723874648151	0.00151533596286338	3.25701557457097e-09	0	1	0	1	1	0	1	1	0	1	1
TanjilG_31972	OIW20043	PREDICTED: uncharacterized protein LOC109337704	Scaffold_9_171	44763	45443	50.5584	1.43883	4.45427	1.65591	2.85514	5.05603	2.11058	3.99228	3.64882	5.20033	4.33064	5.41614	0.542222566091889	0.00190654258616785	0.71575518084484	0.189879409055002	0.00235124741950364	0.00692020334705843	0.0194928756125142	9.93402156441044e-06	0.266915905525347	0.00511250160780975	0.00588379259911793	0	1	0	0	1	0	1	1	1	1	1
TanjilG_32633	OIW04441	hypothetical protein TanjilG_32633	LG09	19961769	19961990	395.442	0.816219	2.77058	1.95041	1.89094	3.75621	2.50322	4.01236	3.80646	1.45191	2.48122	4.56934	0.579835180601097	0.000685262379005398	0.119909076500526	0.0783840323789344	5.79537285689568e-07	0.300650739323245	0.0128592743060879	4.01854100150578e-11	0.00562312996593551	2.61326443068538e-07	1.0685053932491e-07	0	1	0	0	1	1	1	1	0	1	1
TanjilG_32788	OIW10048	7-deoxyloganetin glucosyltransferase-like	LG06	10453968	10455872	110.597	4.54212	5.75615	2.53959	7.302	7.68322	2.24909	3.55101	6.66763	3.87279	3.68026	8.65545	0.00587556920853299	0.000110537614098354	0.422045327404548	0.000891772840827353	0.000151230476530551	0.0585435064155397	0.0803439857285322	7.26223168064666e-11	0.2693454765868	0.0174628038685388	4.76546398796414e-07	1	1	0	1	1	0	1	1	0	0	1
TanjilG_32798	OIW10058	transcription factor MYB24-like isoform X1	LG06	10348113	10349362	441.431	1.69429	3.47038	3.05774	3.33886	4.58722	2.51424	3.22151	4.44248	0.839186	1.48723	6.08863	0.275896568351743	0.00234965574196902	0.044353367716231	0.00837692386748209	1.19027405763888e-05	0.833960367784822	0.827028324838328	1.43305377480106e-10	0.0620752119160074	0.00359421174967424	6.55180723148039e-06	0	1	1	1	1	0	1	1	0	0	1
TanjilG_32871	OIW15467	organic cation/carnitine transporter 4-like isoform X1	LG03	6432281	6435375	1096.88	-0.356071	2.20127	1.27036	4.71572	4.48233	1.91652	3.483	4.28885	1.70065	3.57164	5.64985	0.919488604637968	0.0185288745109394	0.557173010590618	8.51422326001078e-10	4.97203735368329e-09	0.207281083927103	4.04158223659335e-05	1.69519221888706e-15	0.0685823778844526	2.12054029012916e-05	5.7354953494339e-09	0	1	0	1	1	0	1	1	0	1	1
TanjilG_32872	OIW15468	organic cation/carnitine transporter 4-like	LG03	6498205	6503076	1098.15	-0.193114	3.69235	0.960492	3.42719	5.15501	0.852208	4.04903	5.14655	1.55129	2.52501	3.97587	0.992783508851695	1.73129447767652e-05	0.782892780628539	0.000143685202098946	1.65914460368638e-10	0.318844135580644	0.0273600798440734	2.8499498682351e-07	0.598055426477014	2.15945246493557e-06	2.11739564879928e-11	0	1	0	1	1	0	1	1	0	1	1
TanjilG_00425	OIW10487	early nodulin-75-like	LG06	6092375	6092779	3125.22	0.427329	3.05665	5.69581	4.96143	4.2933	1.24909	3.8895	6.56393	-1.14904	1.75367	5.2504	0.961390216855383	0.0525477395275215	5.64241139793325e-05	0.000300382416644968	0.00159179567760487	0.783016361224722	0.84396258095671	9.36030286507085e-06	0.610429541640619	0.00413583177415122	2.1448962306611e-08	0	0	1	1	1	0	1	1	0	0	1
TanjilG_01457	OIV95663	probable glutathione S-transferase parA	LG16	6520568	6521873	484.999	1.94194	5.3482	6.30403	3.34573	3.72151	2.55231	3.13425	7.12858	0.855209	2.94287	9.02912	0.359074866477427	0.000430794492966625	0.00012465994075697	0.100287451376412	0.0196788424965979	0.897286567480256	0.300312617851716	9.69576064969029e-13	0.179651685605459	0.0412930924303183	1.83604830870428e-08	0	1	1	0	1	0	1	1	0	0	1
TanjilG_02024	OIV91406	PREDICTED: laccase-14-like	LG20	636755	639208	686.65	3.66287	11.7281	5.13871	9.23455	9.81267	7.09758	6.10289	9.59881	5.32583	6.23073	9.71611	0.343864469070984	6.10368542153004e-05	0.305823689655895	0.00628652898332395	0.00126040622518398	0.204764305235557	0.181174122380484	3.08573657625928e-05	0.0543088345103425	0.0295862936688955	8.97100661821165e-05	0	1	0	1	1	0	1	1	0	0	1
TanjilG_02441	OIW17813	hypothetical protein TanjilG_02441	LG01	34061307	34061459	530.268	2.88404	3.84694	1.15438	1.80152	2.56449	1.24647	3.81054	6.41827	0.388899	1.80927	4.6014	0.00691237352166732	3.66325298831678e-05	0.717919855436563	0.228130026945351	0.0147169156186359	0.970814234087902	0.419301483078655	2.19389782670097e-08	0.395420612915093	4.72283159311122e-05	5.65879256970533e-15	1	1	0	0	1	0	1	1	0	0	1
TanjilG_02639	OIW07005	cytochrome P450 81E8-like	LG08	6479679	6481562	1056.97	1.70094	3.59839	4.83387	5.45249	5.35273	1.36894	2.8328	4.66691	0.696115	3.21598	7.99732	0.434345049961738	0.0156128194118313	0.00249248063943689	0.000105763683147332	0.000148629413831247	0.932634911790177	0.12183777479941	4.47049415149262e-12	0.566755678671065	0.0526130527114227	0.00020376521543477	0	1	1	1	1	0	0	1	0	0	1
TanjilG_02833	OIW13313	PREDICTED: pro-hevein	LG04	14333087	14334270	8636.78	1.28905	3.38408	2.41698	1.21307	1.54788	1.38712	2.52516	5.2852	1.98969	2.8719	5.66334	0.182321334602285	5.20763007043068e-07	0.00448491557318662	0.339100999716477	0.0849202881560231	0.0347857608549455	0.000161652415462937	5.55666960219682e-21	0.144386166654738	0.000461217818089704	5.1436321415223e-18	0	1	1	0	0	0	1	1	0	1	1
TanjilG_02933	OIV93396	ATP-dependent 6-phosphofructokinase 3-like	LG18	6747144	6747552	134.358	1.40487	2.00375	1.20578	1.22424	3.08083	2.01259	1.63074	3.4453	1.41024	2.21422	3.15491	0.13809412983375	0.0103578124644588	0.483180026923049	0.348793049705815	5.99104658665686e-06	0.233210990570394	0.0128809090488585	6.71595207798782e-07	0.0166745242173539	0.035176100323745	9.26336585473793e-08	0	1	0	0	1	1	0	1	0	1	1
TanjilG_03006	OIW08330	transcription factor TCP4-like	LG07	3809942	3811048	118.362	3.03175	1.45201	0.350792	2.35413	2.18636	2.18453	1.16017	2.54197	0.346466	0.810176	3.86795	6.31848781859902e-05	0.113130979979135	0.99534370718437	0.00404392482030504	0.00450319535947455	0.960632294550734	0.943778875529795	1.47503212273801e-09	0.011145813415801	0.183525127893762	0.000149532303912609	1	0	0	1	1	1	0	1	0	0	1
TanjilG_03016	OIW08340	berberine bridge enzyme-like 22	LG07	3756077	3757558	102.446	2.25292	2.28805	-0.591674	1.10228	1.42783	3.06268	2.17853	2.79527	-0.225481	1.78736	2.98057	0.0255668003879615	0.0137911276991608	0.933951009517777	0.572221932772456	0.254660284102149	1	0.287676732419853	0.000112193707221053	0.000760018067403744	0.0149009732888047	0.000485874364144145	1	1	0	0	0	1	1	1	0	0	1
TanjilG_03343	OIW08667	cyanogenic beta-glucosidase-like	LG07	1209802	1212895	1521.23	1.48248	4.15938	2.05828	5.90116	4.21243	0.0305705	3.03717	8.17801	0.672461	2.15954	6.86706	0.465432666858219	0.00121122302195743	0.47933602681112	1.1959531813729e-06	0.000778256630865308	0.924152507887983	0.552155271433544	1.36386535314655e-10	1	0.0207309865258841	3.30142895653241e-14	0	1	0	1	1	0	1	1	0	0	1
TanjilG_03933	OIW01795	hypothetical protein TanjilG_03933	LG11	17988625	17988965	2181.05	2.65502	7.7747	3.62163	13.6106	6.89467	4.5088	6.58714	8.9196	4.27393	3.38923	9.29863	0.348332505937929	3.7419683519692e-05	0.337399442415838	6.31744812677062e-10	0.000214234480167594	0.128890851551579	0.508447120504869	1.4488238206416e-08	0.0600572086883304	0.000590146902021042	1.14609718073599e-07	0	1	0	1	1	0	1	1	0	0	1
TanjilG_03935	OIW01797	inhibitor of trypsin and hageman factor-like	LG11	17969703	17970054	5942.84	3.3255	7.78996	3.78319	11.6023	6.37172	4.12755	6.38199	9.27042	4.2586	4.46441	8.90306	0.143997104022183	2.6201014240307e-06	0.204341389999889	1.13308563151917e-10	0.000180873539602814	0.0808346985500129	0.0687385813217591	2.75558383696491e-09	0.0543088345103425	0.000236506841796782	1.08867122923894e-09	0	1	0	1	1	0	1	1	0	0	1
TanjilG_05426	OIW14805	syringolide-induced protein 14-1-1	LG03	24860077	24860796	213.02	1.13549	3.01824	-2.36363	0.43724	2.414	0.0393774	2.23947	2.78648	-1.69235	2.60415	2.3894	0.475308011289966	0.0031386809642975	0.101611122028482	0.963083988684704	0.0290772862133805	0.300767662862341	0.0487632251909097	0.00901728751631159	1	0.0293581106432084	0.00247741804919404	0	1	0	0	1	0	1	1	0	1	1
TanjilG_05574	OIV93871	caffeoyl-CoA O-methyltransferase-like	LG17	16623519	16626973	788.496	1.62376	2.92098	2.39359	2.24191	2.45414	2.52128	2.1301	3.52972	1.62573	2.07559	4.65711	0.228096450617537	0.00439904558583327	0.106083646975094	0.096213726118348	0.0305224142722512	0.346098376129552	0.241944834092264	3.33485193698045e-08	0.0284308687765738	0.041803716329683	8.70467698291161e-05	0	1	0	0	1	1	1	1	0	0	1
TanjilG_06311	OIW21569	ethylene-responsive transcription factor ERF114-like	Scaffold_146_50	5025	6276	84.2039	2.62607	2.63999	4.15748	8.25856	1.85472	3.89623	4.01207	4.07254	0.861004	1.94843	4.26539	0.170946989855615	0.18519009392638	0.0435687448053196	7.80032722812003e-05	0.493840344535184	0.907440211018968	0.822252175414738	0.00414749035945676	0.0197334872241851	0.006213828364611	0.00325670158337386	0	0	1	1	0	1	1	1	0	0	1
TanjilG_06591	OIW20190	LRR receptor-like serine/threonine-protein kinase GSO2	Scaffold_15_89	17136	20069	131.6	3.27394	2.94898	2.6903	4.58036	3.43348	2.23993	2.41798	2.9141	-0.00542317	2.13264	5.2576	0.0283132454694765	0.0327468684862741	0.183449322027082	0.000293468953555801	0.00743233821986655	1	0.510088606677985	8.97804286936136e-07	0.174043767102417	0.0660345274057823	0.0144359437026034	1	1	0	1	1	0	0	1	0	0	1
TanjilG_06888	OIV95426	transcription factor HBP-1b(c38)-like isoform X1	LG16	14530322	14538811	100.049	0.583133	2.94151	3.39656	4.61281	5.49539	6.94741	3.02638	5.92528	2.81941	2.53729	11.9534	0.914924405976578	0.0746811581718448	0.0873295896284568	0.00178214309388773	3.45498284197675e-05	0.278032727199886	0.419574328125944	2.96413743234449e-12	0.00166926165872965	0.0367165338806318	1.1276126202421e-06	0	0	0	1	1	1	1	1	0	0	1
TanjilG_08235	OIW20275	patatin-like protein 2	Scaffold_17_6	54745	57927	669.86	-0.0255863	2.41997	2.50046	0.911449	6.8317	3.96104	3.82628	8.15678	4.11966	4.60201	8.52904	0.995195734723581	0.298493746199047	0.538078359348147	0.929990650491848	9.67112314276357e-06	0.0880078100530847	0.03059988410774	9.75395825002608e-10	0.0423627747260775	0.0247413018438811	1.09714914879467e-08	0	0	0	0	1	1	1	1	0	1	1
TanjilG_08525	OIW21719	probable calcium-binding protein CML45	Scaffold_174_37	16050	16421	133.183	1.2959	2.84912	1.54726	2.72821	5.89322	4.90434	4.44038	4.17122	2.75151	4.94206	5.96126	0.581224551598345	0.0629892174915155	0.726922279263261	0.136683982733702	7.80275234323608e-07	0.207718752960841	0.00130324161809484	1.61779860735294e-07	0.000452526474253324	0.000626217113124685	0.000581420907653247	0	0	0	0	1	1	1	1	0	1	1
TanjilG_08543	OIV94245	2-alkenal reductase (NADP(+)-dependent)	LG17	9642531	9644871	618.545	4.66295	5.93548	3.56426	1.43962	4.53438	1.17087	4.10816	7.1041	2.65086	1.76281	9.46523	0.00957645476048001	0.0002505465264492	0.185555952898194	0.789092442363764	0.0067505444594776	0.360779562039987	0.937894714310467	2.22704009287982e-12	0.733887508163533	0.0136281128099536	5.42208098889072e-07	1	1	0	0	1	0	1	1	0	0	1
TanjilG_08833	OIW17555	LEAF RUST 10 DISEASE-RESISTANCE LOCUS RECEPTOR-LIKE PROTEIN KINASE-like 1.4 isoform X1	LG02	207478	211990	2147.75	0.887018	1.94628	1.15008	2.04946	3.56535	1.67348	2.47421	3.52505	1.51062	2.88148	3.57865	0.365046757428854	0.00421591925457403	0.411571642740891	0.0044389774661721	1.19380531576393e-09	0.103127151009051	1.21402009981415e-05	1.06954161337247e-10	0.0287792280896854	0.000113048486971271	4.07288392426003e-10	0	0	0	1	1	0	1	1	0	1	1
TanjilG_08981	OIV91569	chaperone protein dnaJ 20, chloroplastic-like	LG19	17673300	17673680	214.466	0.705823	7.76127	8.09915	4.44103	6.50675	6.63008	3.55207	10.7008	4.42807	4.45065	8.35748	0.954690263994797	0.000795857915229556	0.00550702801390637	0.188044210976402	0.00308640243694009	0.192257770344799	0.292187450479001	1.1805822960622e-05	0.0104930928956293	0.14739138027945	1.22021985102594e-06	0	1	1	0	1	1	0	1	0	0	1
TanjilG_09092	OIW19308	protein PLANT CADMIUM RESISTANCE 2-like	LG01	4253065	4254705	2368.44	0.183397	4.03032	1.23	-0.112331	2.67637	1.62722	2.2467	3.64634	2.76773	2.59993	2.78587	0.992783508851695	4.09521824059294e-05	0.719759587646459	1	0.0175607757768966	0.0380826596226329	0.0715241515017033	0.00347019679828783	0.254118457206935	0.0377454454823937	9.35388560935628e-05	0	1	0	0	1	0	1	1	1	0	1
TanjilG_09863	OIV96436	putative receptor-like protein kinase At1g72540	LG15	19806014	19808595	138.274	1.92668	3.35322	2.49982	5.08643	4.54304	0.529985	2.07404	5.65552	0.300831	2.24467	5.19289	0.133850981213137	0.000500952762419099	0.0693033308761911	4.3695671056424e-07	2.9985264691477e-06	1	0.138841099907694	3.08083244753334e-10	0.834732945119062	0.0430319245943045	1.36731492071454e-11	0	1	0	1	1	0	1	1	0	0	1
TanjilG_10330	OIW01169	probable LRR receptor-like serine/threonine-protein kinase At3g47570	LG11	33017028	33020634	135.264	1.19933	4.12828	2.12797	2.29606	3.00207	2.40087	3.39278	3.09182	-0.278557	2.4519	5.13887	0.463517991914021	8.56086559696557e-06	0.197704182294093	0.0696688581558444	0.0040386614498637	1	0.0865575468451198	8.45309721522239e-10	0.0378465624160804	0.000421833519031655	0.000620416877443772	0	1	0	0	1	1	1	1	0	0	1
TanjilG_11412	OIW14067	Precursor of CEP14	LG04	5085550	5085846	199.245	-1.20245	1.30742	-0.147941	0.810094	3.58266	2.43031	2.26343	2.72682	0.595214	2.83237	3.22118	0.29814067952084	0.238663196945549	1	0.733432051553641	1.97995402138193e-06	0.844262607837788	0.00268747056661943	6.72069201815353e-06	0.00740368246963066	0.00631788712259517	0.000287669319023335	0	0	0	0	1	1	1	1	0	1	1
TanjilG_11608	OIW02015	acidic endochitinase-like	LG11	10443655	10444818	380.752	3.15877	6.58973	5.18033	1.7872	4.81626	2.5917	4.6646	3.80726	0.954828	3.71502	8.76986	0.0777294217572185	1.76753177841375e-06	0.00244863382157688	0.60555877279957	0.000996071735385868	0.885359019662627	0.0793584084304038	2.43150498165521e-12	0.180170241318569	0.00119837875903353	0.00650731201809292	0	1	1	0	1	0	1	1	0	0	1
TanjilG_12748	OIV98625	L-type lectin-domain containing receptor kinase IV.1-like	LG13	16466496	16468304	164.994	-0.27138	1.7422	1.25732	1.04733	3.13654	2.28888	2.20198	2.51381	1.1391	2.40185	3.57848	0.953493097899201	0.0577904512775655	0.494708466472934	0.540823474759266	2.06133779603353e-05	0.471958487927755	0.0116215270044655	1.10589503420927e-07	0.00913251095181658	0.00546126422219168	0.000529925720374933	0	0	0	0	1	1	1	1	0	1	1
TanjilG_13040	OIV96108	receptor-like protein kinase HAIKU2	LG16	732657	736048	462.035	0.962819	2.52254	2.0404	2.32613	2.89262	1.51352	2.02523	4.26637	0.0941655	1.80504	2.3239	0.462888943073244	0.00268236781952396	0.0934862654736874	0.0165677985088098	0.000342767039109326	1	0.187395125004658	0.00212952897449087	0.15900048325048	0.0172693401143898	1.91456378402255e-09	0	1	0	1	1	0	1	1	0	0	1
TanjilG_13045	OIV96113	pathogenesis-related protein 1-like	LG16	758310	758807	7465.74	3.49052	5.80308	3.5949	1.53168	3.78522	5.31698	4.42443	8.16788	2.82193	0.965294	7.6189	0.0651963117126171	0.00012881114531649	0.140924401551457	0.742399591668112	0.0332456721812724	0.301623688385879	1	9.03874177908412e-09	0.00157275669787195	0.00470801609684716	1.22177496248443e-09	0	1	0	0	1	1	1	1	0	0	1
TanjilG_13185	OIW18433	stigma-specific STIG1-like protein 1	LG01	20275411	20275782	236.831	5.33483	3.75727	2.75756	2.33622	1.75728	5.82076	3.76701	8.26587	2.04723	2.94483	8.41769	0.000614872958209122	0.017495269438021	0.323557132763121	0.379058089493432	0.510520926597711	0.492114150419791	0.294178625202119	1.94744229038171e-11	0.000391779449505864	0.0126873516841967	1.45109116666468e-10	1	1	0	0	0	1	1	1	0	0	1
TanjilG_13603	OIW02966	peroxidase 55	LG10	16088844	16089700	3933.01	1.17214	4.69878	1.96192	2.66999	2.85979	-0.118811	2.61365	4.05421	0.860778	1.942	3.97001	0.352584584267779	9.50253981435571e-10	0.141994090728166	0.00423590622617904	0.000668021788912903	0.697890365030972	0.146482808595922	5.06372712298737e-08	1	0.00205130792481468	4.33819960278185e-08	0	1	0	1	1	0	1	1	0	0	1
TanjilG_13608	OIW02971	hypothetical protein TanjilG_13608	LG10	16043912	16051388	3878.25	1.11022	4.10798	1.75775	2.23441	2.62361	-0.0955391	2.48922	3.90949	0.835255	1.85176	3.95719	0.280082704264699	3.46603345155487e-10	0.111876879937659	0.00578771147045397	0.000201259051661408	0.621819592893185	0.066477147523556	1.3565520966762e-10	1	0.000572749177881184	4.59606114944774e-10	0	1	0	1	1	0	1	1	0	0	1
TanjilG_14105	OIW17859	probable WRKY transcription factor 50 isoform X2	LG01	33505499	33507297	506.249	0.615857	2.68601	2.24423	2.22626	5.34512	5.27968	5.00284	3.84849	2.88335	4.57234	6.95496	0.909956178167112	0.137961340545053	0.518884293334159	0.399203643028544	9.55503553780881e-05	0.199292863527581	0.00817520504068879	1.82264219779387e-08	0.000507875166332392	0.000419232994620902	0.00508376491410508	0	0	0	0	1	1	1	1	0	1	1
TanjilG_14608	OIV97063	putative calcium-binding protein CML19	LG15	10233543	10233977	113.483	4.14035	4.35938	-2.23829	2.54262	4.77525	1.47888	3.43999	3.32513	-1.12432	2.13414	4.49333	0.0322141427217259	0.0175826200863533	0.606655850428695	0.37090523529644	0.00478836344343643	0.856162237331413	0.869542313141947	0.00223091752123979	0.632085157713796	0.0432247768111653	0.0408570181446347	1	1	0	0	1	0	1	1	0	0	1
TanjilG_14630	OIW01631	probable protein phosphatase 2C 38	LG11	22174231	22177227	94.9865	-0.061823	3.7309	0.212707	4.26045	3.62645	-0.205379	2.24907	4.03339	-0.619989	1.71327	2.93803	0.992783508851695	6.93428105907704e-05	1	5.52217885390929e-06	6.25546457080703e-05	0.881441752857677	0.499355126855152	0.000526213955377689	0.989099903767066	0.0218434826004625	1.41855339870403e-06	0	1	0	1	1	0	1	1	0	0	1
TanjilG_14728	OIV90330	serine/threonine-protein kinase OXI1-like	LG20	16757123	16758424	320.105	2.1883	5.36648	2.72579	1.59311	3.56562	2.5035	3.17591	5.18868	1.71935	2.22262	5.98051	0.0976666945879922	5.90949694772316e-08	0.0693033308761911	0.42838312328381	0.000629316239913795	0.354518862223652	0.24860181558599	1.97979833012483e-11	0.0487589201367523	0.00277067304940207	1.48914063802808e-08	0	1	0	0	1	1	1	1	0	0	1
TanjilG_15180	OIW08219	putative serine/threonine-protein kinase	LG07	4866879	4869737	39.6488	2.42183	2.18612	1.17365	1.98971	2.38187	2.24482	2.264	3.72253	2.954	2.20227	2.67911	0.0499860887263071	0.0767917772776602	0.743497304579082	0.228886968719169	0.047290253995405	0.0252409734673235	0.240489855528318	0.00449238521923077	0.081059264778729	0.0463542377891973	0.000169734419629463	1	0	0	0	1	0	1	1	1	0	1
TanjilG_15344	OIW09862	hypothetical protein TanjilG_15344	LG06	13290117	13290380	141.108	0.897901	3.02902	1.32225	2.32656	2.40146	0.805496	3.17839	4.79468	0.882677	2.4097	3.66724	0.598348514226467	0.00189780898967619	0.597302006597315	0.0435899578935025	0.0183831149355391	0.734638950314398	0.06110450390352	7.39951645620385e-06	0.641897130063634	0.000626217113124685	5.7354953494339e-09	0	1	0	1	1	0	1	1	0	0	1
TanjilG_15424	OIW12975	probable pectinesterase/pectinesterase inhibitor 41	LG04	22985549	22988329	2845.09	2.11888	4.94206	4.77865	6.2367	3.10995	1.92979	3.47443	7.20104	0.490762	3.48144	6.88151	0.281433278896223	0.000348025895373896	0.00311125355120059	5.81425381663638e-06	0.0665374503695918	0.986314216038649	0.077959520216658	7.27439918237258e-09	0.350971634694418	0.0156587393073706	2.61433743781814e-09	0	1	1	1	0	0	1	1	0	0	1
TanjilG_15864	OIW12944	NUCLEAR FUSION DEFECTIVE 4	LG04	23256484	23258328	300.968	2.22513	6.06929	3.54985	24.8048	6.41453	3.0067	2.88908	10.9136	2.06452	6.24154	7.90204	0.458607159943342	0.00212926026663252	0.337087673039757	8.44804094955283e-37	0.000764934979678837	0.658039199497691	0.0057869202511015	1.69499511019209e-06	0.257737534432378	0.18716762836159	1.3675380156798e-09	0	1	0	1	1	0	0	1	0	1	1
TanjilG_15876	OIV89603	hypothetical protein TanjilG_15876	KV862272	525618	532322	223.247	0.00413478	2.23543	2.07317	1.39891	4.54712	2.67871	2.52942	2.57888	1.18117	3.09606	6.05438	0.998932070854964	0.0521645235061151	0.237097762037499	0.496167767007619	1.12643211942295e-06	0.60738188446391	0.00861869431419164	2.91542455859493e-12	0.0184678781180001	0.0129059780050951	0.00700308087060867	0	0	0	0	1	1	1	1	0	1	1
TanjilG_16006	OIW10634	Geraniol dehydrogenase 1	LG06	4584098	4585158	73.5018	4.72996	4.08097	1.91083	7.82266	4.45604	2.71444	2.80879	3.83265	2.52339	-0.22817	7.95333	0.00296920033284094	0.0125875758455829	0.664704929655065	0.000217282057908609	0.0101901926307187	0.309296164603481	1	6.75613397208803e-10	0.154319035795056	0.0782303361386329	0.00617613115928529	1	1	0	1	1	0	0	1	0	0	1
TanjilG_16174	OIV97413	PREDICTED: uncharacterized protein LOC109327839	LG15	866274	866834	19.1232	4.94317	2.41702	1.69193	6.4738	5.49636	-0.185504	1.46881	3.44844	1.31842	3.08098	3.30929	0.023816326903623	0.0790900196658297	0.524326612441933	0.000639172394540061	1.65573722712154e-06	0.61184220870921	0.0273755298773891	0.000652580150237642	1	0.254680706827553	0.00258350080166857	1	0	0	1	1	0	0	1	0	1	1
TanjilG_16207	OIV97446	wound-induced protein 1-like	LG15	611732	612088	197.463	2.13245	1.64732	0.570121	1.9678	2.0756	1.71628	2.23406	3.36707	2.65812	1.73951	4.73226	0.0463331645927283	0.158747994608015	0.95396756978216	0.112706333036564	0.0491193569196851	0.0202863882864202	0.397111298069666	5.92104776914251e-10	0.150172686149955	0.0169306868668201	3.45458377292421e-05	1	0	0	0	1	0	1	1	1	0	1
TanjilG_16238	OIW00989	Uclacyanin-3 protein	LG12	1105978	1108070	715.578	5.46996	3.84882	3.03182	10.7573	4.28116	2.49482	2.34059	7.44616	3.35145	2.08776	7.31811	0.000372584714094654	0.0145830159179916	0.231663683481632	2.67715968525609e-08	0.00518669443601064	0.104056603515593	0.750700487026648	2.95769595567262e-09	0.205282287753653	0.157497340803429	3.8784461086654e-09	1	1	0	1	1	0	0	1	0	0	1
TanjilG_16724	OIV98397	PREDICTED: uncharacterized protein LOC109326512	LG14	1850938	1851486	46.0151	0.715478	2.58935	2.70029	3.20477	2.41217	2.32002	3.29551	2.76665	0.814478	3.06936	4.927	0.794324366923005	0.0347185332362789	0.100064247946463	0.0104239354801949	0.0690981206942906	0.850268857949274	0.0322826445793888	2.41272440715808e-07	0.081059264778729	0.00240648018437609	0.00797901700207275	0	1	0	1	0	0	1	1	0	1	1
TanjilG_16846	OIW19332	mannose/glucose-specific lectin-like	Scaffold_3_156	30980	32615	57.225	0.399134	3.67593	2.85523	3.65987	4.10228	0.664772	3.66116	6.78115	-0.300487	1.75207	5.76572	0.96931949573561	0.0153058902553813	0.208842659683698	0.0224861096794017	0.00258257910019168	1	0.870635853126914	9.17039258651188e-07	0.888933085072588	0.013937647277149	3.62612445258331e-07	0	1	0	1	1	0	1	1	0	0	1
TanjilG_17420	OIV99610	NAC domain-containing protein 35-like isoform X1	LG13	700037	701731	736.866	0.99127	2.26645	0.780649	2.10555	3.18932	2.16765	2.86689	2.33572	-0.672708	2.20166	4.80094	0.482347099220282	0.0156062111389377	0.852700333747689	0.0515083424218586	0.000108406059988637	0.820964911549496	0.0641627469432453	5.08664794566555e-11	0.0325655710469907	0.000792639368135182	0.00471027566338152	0	1	0	0	1	1	1	1	0	0	1
TanjilG_17809	OIW20625	probable WRKY transcription factor 31	Scaffold_31_6	4509	6978	1402.19	0.981718	2.21706	1.13316	2.29651	2.22044	1.23111	2.00826	3.51429	0.807745	1.99693	3.8595	0.186058126264494	3.52947786633503e-05	0.263454514510519	2.71778694263215e-05	2.53057945930075e-05	0.453285805295336	0.0011198139640254	9.72216147606211e-17	0.0749243330377811	0.000258400402378439	1.18815796610978e-13	0	1	0	1	1	0	1	1	0	0	1
TanjilG_17879	OIV91887	PREDICTED: uncharacterized protein LOC109334184 isoform X1	LG19	13933517	13934620	372.956	1.73728	2.07504	1.83835	2.9634	2.57508	0.73329	2.15137	3.23537	0.255913	1.44863	3.15211	0.0409712910882679	0.00605716668098083	0.0750222423384695	3.6746379346796e-05	0.000334045641582412	0.985414798771008	0.302180889639958	3.2966419233395e-07	0.548606504365034	0.00280720641399258	2.79201298422278e-07	0	1	0	1	1	0	1	1	0	0	1
TanjilG_19019	OIW16303	transcription factor JUNGBRUNNEN 1 isoform X1	LG02	23635987	23639357	297.158	1.60076	3.30015	1.67305	1.95758	2.8447	2.03946	2.57135	3.85088	0.721526	1.973	4.43634	0.0919185390637803	5.73895920049902e-06	0.176044896323969	0.036772811167823	0.00010981380134609	0.731204428585821	0.0507590015539645	2.03179832433837e-12	0.0174513651637153	0.000541141326330565	2.74065410717438e-09	0	1	0	0	1	1	1	1	0	0	1
TanjilG_19081	OIW16365	probable WRKY transcription factor 31 isoform X1	LG02	24057229	24060584	38.4604	1.88815	3.88966	1.6082	3.57053	2.03517	3.1135	3.67697	3.98546	1.21044	2.26991	3.88474	0.290564229372166	0.0268952682849493	0.682535626935909	0.041953919199401	0.31275583452842	0.72407174654633	0.476634287510185	0.00103746449983893	0.0492947922680459	0.00317696599273216	0.000646061059506068	0	1	0	1	0	1	1	1	0	0	1
TanjilG_19542	OIW06893	hypothetical protein TanjilG_19542	LG08	7586725	7586928	168.631	1.01902	2.13672	0.5816	1.67241	2.93639	0.626883	2.33462	3.73236	0.845253	2.75284	4.00571	0.263407133755572	0.00140412749846914	0.85865504165444	0.0405558698238112	2.56592897630104e-06	0.552346380308481	7.45737018578841e-05	3.54621896629586e-13	0.591799515645097	0.00038953346341799	4.64025613137018e-11	0	1	0	0	1	0	1	1	0	1	1
TanjilG_19550	OIW06901	cysteine-rich receptor-like protein kinase 25	LG08	7679557	7687243	802.894	0.603227	2.66932	0.94436	1.822	3.09681	2.26419	2.47521	2.27511	0.774197	1.73925	4.18109	0.725740860525661	0.000731380434094738	0.723998523694873	0.0786587177992532	3.37968081450509e-05	0.726504968528666	0.191134441746185	5.30462466588709e-10	0.0104930928956293	0.00161897607764712	0.00239411765178563	0	1	0	0	1	1	1	1	0	0	1
TanjilG_19929	OIV96770	probable calcium-binding protein CML44 isoform X1	LG15	16600170	16600622	41.7962	2.33055	6.25441	3.45415	5.67024	4.7382	2.26477	4.59462	10.1216	2.67036	3.88464	7.38653	0.362562253374481	0.000788164247000271	0.191305100038274	0.018993575053093	0.0150339618759191	0.473823027928036	0.112945716495277	2.74748240038913e-07	0.322129234555493	0.00534024595154966	7.50853582640314e-08	0	1	0	1	1	0	1	1	0	0	1
TanjilG_20055	OIW07954	hypothetical protein TanjilG_20055	LG07	7918806	7919450	21878	1.60805	2.05682	2.49842	3.72425	1.67831	1.43776	2.80218	4.96277	0.378735	1.98297	4.55645	0.147129813720276	0.034272230663515	0.0225866142652177	5.66757960058241e-06	0.131212264273174	0.956476104413697	0.133980121178477	3.27546231125833e-10	0.218986053625211	0.000948888180439463	1.07890928055321e-11	0	1	1	1	0	0	1	1	0	0	1
TanjilG_21172	OIV90040	mitochondrial phosphate carrier protein 3, mitochondrial	LG20	21651706	21654903	938.751	0.83407	2.88419	1.57444	1.45844	4.83287	2.42575	1.96789	4.3099	2.10623	2.74586	3.96192	0.582676721720047	0.000625037197260372	0.351615691509544	0.312077895601434	3.63283585464295e-10	0.0647987305384237	0.00496554472140814	4.31049973716597e-08	0.0100717525566022	0.0255688070752134	3.70130355964443e-09	0	1	0	0	1	1	0	1	0	1	1
TanjilG_21489	OIV95099	respiratory burst oxidase homolog protein B-like isoform X2	LG16	17707420	17714980	50.5876	2.44111	7.32009	0.544453	6.91715	8.94552	2.58321	3.53139	4.75396	2.08887	2.96641	4.57089	0.248636281925259	0.000363517287708756	1	0.00172085414514464	2.73488081286457e-06	0.462249504366523	0.259630795710867	0.000430866601667274	0.15651508865538	0.0144325373965854	0.000282807815110283	0	1	0	1	1	0	1	1	0	0	1
TanjilG_22163	OIV94966	chalcone synthase 1-like	LG17	365820	367437	5140.1	1.2923	2.12693	1.88253	2.56448	2.37232	3.4851	1.95031	4.37612	1.97921	1.50844	3.47088	0.200096561149868	0.00748548030639983	0.0868092818881433	0.00119683505892015	0.00181807653041589	0.0468476380883739	0.309028727103173	7.71291941354669e-08	2.39122154717376e-06	0.0112535542441222	9.1925645836191e-12	0	1	0	1	1	1	0	1	0	0	1
TanjilG_22278	OIW00779	probable WRKY transcription factor 71	LG12	7050461	7052281	277.892	2.13411	2.42942	1.7259	2.90104	1.95063	2.24728	1.95984	3.92228	-0.203599	2.1461	4.36746	0.036132692998686	0.00897490368137358	0.282512643469298	0.00173174850462132	0.0582468720826444	1	0.0836802060547484	5.97041051666693e-09	0.0259778127205826	0.0325959352997443	3.65088316528607e-07	1	1	0	1	0	1	0	1	0	0	1
TanjilG_22646	OIW17534	Potassium transporter 5	LG02	2846445	2852087	175.96	2.58565	3.39399	2.26809	3.62406	3.28353	0.310403	1.52947	4.37286	1.62755	1.71802	6.08764	0.0237335810518657	0.000840952917852797	0.172643465437352	0.00148080134892728	0.00155242305053877	0.342112894384391	0.516176875374947	7.09820250613086e-14	0.947572868896306	0.175545730937375	3.45210979848799e-07	1	1	0	1	1	0	0	1	0	0	1
TanjilG_22978	OIW11171	sugar transport protein 13-like	LG06	166555	169860	1241.34	1.74322	3.22808	1.64672	3.60614	3.55979	1.45774	2.20993	6.54288	-0.0203418	1.99069	6.19236	0.0967240582984375	7.38235100686992e-05	0.297253735143748	9.6730080104518e-06	5.09017110117055e-06	1	0.116748567120853	7.66245260105069e-19	0.19949138174659	0.0102544497961459	3.91328091990204e-20	0	1	0	1	1	0	1	1	0	0	1
TanjilG_22979	OIW11172	sugar transport protein 13-like	LG06	157510	161208	2619.2	1.67017	3.05138	1.68051	3.57954	3.58866	1.70624	2.88938	6.22863	0.180389	2.01611	5.80894	0.115828374926793	0.000205125480353196	0.272025172637749	9.23471865161621e-06	3.5564322969377e-06	1	0.101572952413493	7.09549692153781e-17	0.108754664478731	0.000492997960077932	8.17609241809085e-19	0	1	0	1	1	0	1	1	0	0	1
TanjilG_23112	OIV93271	PREDICTED: uncharacterized protein LOC109332432	LG18	9359892	9360950	166.028	0.920824	4.05976	3.77524	1.99932	5.11668	1.6823	3.61286	4.81264	1.13709	1.18649	3.43216	0.692604469672748	0.000256237900503589	0.0043530600638682	0.284074872439747	1.10300871907348e-06	0.705238853381651	0.951814590228457	0.000776039396531107	0.29427756931153	0.00114463220293087	1.12120791762087e-06	0	1	1	0	1	0	1	1	0	0	1
TanjilG_23369	OIW05583	chalcone synthase 4-like	LG08	25179713	25181413	399.285	2.77774	3.16422	1.92944	2.10198	5.35391	4.11313	2.06578	5.17391	3.11624	3.64971	5.17036	0.105152935206818	0.0453280845256775	0.61134687571553	0.4270540762819	4.90864679473487e-05	0.108499063385205	0.0499359370822697	1.80322893181134e-05	0.00662937194070258	0.202963207379573	3.07397344679656e-05	0	1	0	0	1	1	0	1	0	1	1
TanjilG_23384	OIW05598	glucan endo-1,3-beta-glucosidase-like	LG08	25097379	25098914	22917.9	0.263215	3.95265	1.42695	0.604523	2.59258	0.592173	2.55313	5.76753	1.98896	2.5907	7.03365	0.967620537635945	1.34752768879699e-06	0.482749867439249	0.881524993952949	0.00455980217926338	0.11484650107251	0.0172632957519316	3.05666844249193e-22	0.757445540261331	0.00377013873753609	7.4164694842233e-15	0	1	0	0	1	0	1	1	0	1	1
TanjilG_23940	OIW02232	PREDICTED: uncharacterized protein LOC109359198	LG11	6706749	6708407	389.298	2.68273	3.15975	1.21169	1.37329	4.29901	3.22586	1.9766	4.2761	1.37531	2.17638	5.25925	0.0171068096101334	0.0014681614997718	0.704741155305	0.507640075402453	2.06609409622295e-06	0.477471150811869	0.182461466085225	2.4766540192982e-10	0.00246874557446494	0.0629980471468622	7.71482496806557e-07	1	1	0	0	1	1	0	1	0	0	1
TanjilG_24141	OIW04030	probable WRKY transcription factor 40	LG10	42229	43775	1494.08	0.847885	2.80487	-1.09958	1.32888	4.83486	2.1494	2.24591	4.03636	-0.323904	2.69198	3.73784	0.621572469227065	0.0029257206137293	0.720436306786014	0.466962733963755	4.46351175425233e-09	0.985963473502935	0.0185073748020827	2.91000900992975e-06	0.0519696451885954	0.0177739731323528	5.61203961556362e-07	0	1	0	0	1	0	1	1	0	1	1
TanjilG_24700	OIW12767	2-alkenal reductase (NADP(+)-dependent)-like	LG04	25077496	25079569	746.633	3.25151	4.90878	2.96543	2.35395	3.73882	0.20349	2.70011	7.20845	1.79125	2.29878	8.01271	0.0116303035827874	7.45850916537278e-06	0.0727115309110392	0.165485333353673	0.00108169497181753	0.39936226615164	0.355286854486573	5.87434255880717e-17	1	0.0249601090441382	1.9714351877378e-13	1	1	0	0	1	0	1	1	0	0	1
TanjilG_24773	OIW12840	cysteine-rich repeat secretory protein 38-like isoform X3	LG04	24447691	24448653	338.749	1.8551	3.30318	1.9074	2.10975	3.18203	2.46515	3.32335	3.02604	0.766764	1.9312	5.77753	0.143978939685954	0.000576468094490485	0.296916972058039	0.112667123062904	0.00100075610045868	0.814924424398018	0.309028727103173	1.27219942518043e-12	0.0273254651242015	0.000473222266837766	0.000740753526212509	0	1	0	0	1	1	1	1	0	0	1
TanjilG_24871	OIV98700	PRA1 family protein F2-like	LG13	15077300	15077890	562.984	0.776859	1.91569	0.754192	1.11576	3.20839	2.20532	2.4154	2.28563	0.9627	2.75751	3.81423	0.622645052384263	0.0488960989303095	0.855564631346357	0.541447181897058	6.20377500583406e-05	0.632323184567191	0.00447002271844274	1.53155568087876e-07	0.0225905024218468	0.00407646539681588	0.00451528436218431	0	0	0	0	1	1	1	1	0	1	1
TanjilG_24880	OIV98709	subtilisin-like protease Glyma18g48580 isoform X1	LG13	14945014	14952408	124.392	2.67974	6.37092	2.21818	4.54754	3.75179	5.60853	4.62792	4.54918	2.18343	3.07419	8.48761	0.194469630389259	2.98544447256617e-05	0.569590586265695	0.0132022954088078	0.0638814497429131	0.467154860663107	0.309061841501112	6.14637342152444e-06	0.000410890104887501	0.00181226829693654	0.0013972315109469	0	1	0	1	0	1	1	1	0	0	1
TanjilG_26250	OIV99912	G-type lectin S-receptor-like serine/threonine-protein kinase LECRK2	LG12	17922597	17924975	261.636	0.555575	2.89041	0.920393	2.20736	1.76115	2.06631	2.21759	3.35821	0.396973	1.84662	4.18473	0.716046230947276	2.21009107320766e-05	0.664704929655065	0.00483071312515245	0.0263051161908432	0.917450724581756	0.0578587926677197	3.01809422480293e-12	0.00833377345059794	0.00151740951420919	4.367557651669e-08	0	1	0	1	0	1	1	1	0	0	1
TanjilG_26536	OIV91683	protein LlR18B	LG19	16188701	16189464	87047.8	0.861648	2.62215	2.14164	1.65908	1.90647	0.518927	2.06905	3.71192	0.198972	2.20824	4.66818	0.27533751443903	4.58623815812703e-07	0.000538785205328004	0.00902711367775495	0.000569455396232359	0.985963473502935	0.000170556720535131	1.06183539275507e-23	0.61243709885797	0.000177310725078779	5.07619768419431e-15	0	1	1	0	0	0	1	1	0	1	1
TanjilG_27110	OIV96006	peroxidase A2-like isoform X1	LG16	2293821	2296606	12294.1	1.32049	4.31638	4.25905	2.42677	1.80423	-0.958548	2.50713	6.30765	0.470259	1.71137	6.33999	0.340015712186228	7.45130408468379e-07	1.13324065149211e-05	0.0343578491300304	0.145787784490573	0.936250636919238	0.460705460761029	5.78605984694671e-16	0.553155764265248	0.00880474857375802	1.73770746476569e-15	0	1	1	1	0	0	1	1	0	0	1
TanjilG_27354	OIW21009	RING-H2 finger protein ATL40-like	Scaffold_60_104	67217	67960	115.012	2.57571	4.13051	1.77057	3.9195	4.47403	2.62582	2.92222	7.42253	1.09789	3.22379	6.67934	0.113170017633983	0.00193880187998809	0.624407678158942	0.0132022954088078	0.000736588256904881	0.782760859175637	0.0872864898996766	5.04794960957897e-09	0.107240692264406	0.0331367270484407	2.11867065055513e-08	0	1	0	1	1	0	1	1	0	0	1
TanjilG_28535	OIW21086	peroxidase 21	Scaffold_66_169	16608	26950	1419.33	3.98015	2.3058	4.99072	3.4498	1.11684	0.339807	3.42926	6.83332	0.402826	2.60114	3.50549	0.000230875515328579	0.0591424522457719	1.72569048916323e-06	0.00213146516839597	0.60825444593085	0.973646232153623	0.0731473451598578	0.000173166741855063	0.942584905438874	0.000845527193529958	5.65879256970533e-15	1	0	1	1	0	0	1	1	0	0	1
TanjilG_29141	OIW00151	putative calmodulin-like protein 6	LG12	15979039	15979527	202.915	1.23491	3.57712	0.937634	1.5197	3.29633	1.70873	2.39028	2.36113	1.59596	2.77	4.02333	0.257521040534484	1.41290486556676e-06	0.726286496982682	0.199607733986235	7.24019639650488e-06	0.190498430962441	0.00268747056661943	2.39056345923486e-09	0.0821431572623445	0.0026036180287177	0.00140102644621926	0	1	0	0	1	0	1	1	0	1	1
TanjilG_29227	OIV94127	LEAF RUST 10 DISEASE-RESISTANCE LOCUS RECEPTOR-LIKE PROTEIN KINASE-like 2.1	LG17	11957874	11963043	1230.11	0.74935	1.89949	0.669496	1.79165	4.81065	2.52879	2.80364	3.45829	2.21908	2.81512	5.04038	0.684595570302833	0.0819095255487126	0.915801826132629	0.185046593761391	4.50275766693289e-09	0.0758789967862251	0.00905418699353493	5.11981167063626e-11	0.0138193612347302	0.00193764140765229	2.3715019985649e-05	0	0	0	0	1	1	1	1	0	1	1
TanjilG_29808	OIW06052	endogenous alpha-amylase/subtilisin inhibitor-like	LG08	20188786	20189355	4627.16	2.9595	4.69629	3.1713	6.72306	4.58262	1.05858	3.58608	8.05842	0.993547	3.10373	8.76854	0.0756998838263835	0.000525490019809862	0.133493468636303	1.02209313376787e-07	0.000639064005173157	0.845414047196764	0.148288060201515	1.3416213607765e-14	0.697021408873511	0.00985380651628087	3.88042533234696e-12	0	1	0	1	1	0	1	1	0	0	1
TanjilG_30503	OIW21180	caffeoylshikimate esterase-like	Scaffold_77_17	7145	10929	31.1799	1.21602	6.09731	3.06083	7.1192	8.07544	6.35338	4.13178	10.5927	0.378464	2.20392	9.92651	0.809570291139401	0.00688120752272075	0.54116952075791	0.0122275393424426	0.00105165507515436	1	0.944094725376071	4.20436842922344e-06	0.02843677127381	0.112827917481004	1.18361766965715e-06	0	1	0	1	1	1	0	1	0	0	1
TanjilG_30530	OIW04632	probable WRKY transcription factor 53	LG09	16398759	16401076	716.918	0.744555	1.71181	0.763231	1.21205	2.83738	2.90266	2.71439	2.40293	-0.0731369	2.00864	2.29176	0.583755327211005	0.0510578992852044	0.804982243253302	0.367566354138254	7.69636130925902e-05	1	0.0463311179210264	0.000870499387818238	0.000241872961989753	0.000256848433108434	0.000614536621743859	0	0	0	0	1	1	1	1	0	1	1
TanjilG_30564	OIW14845	cytochrome P450 CYP82D47-like	LG03	24543920	24547945	298.521	4.18117	5.50467	2.60673	8.40025	4.38634	2.41072	3.43798	7.3613	0.435748	3.48883	8.19012	0.0390371364210393	0.00134589610672663	0.534417415744986	0.00011660539380395	0.0230981122069005	1	0.274401472973667	2.75361711847858e-08	0.329583470712667	0.0586556166403301	1.13477133531178e-06	1	1	0	1	1	0	0	1	0	0	1
TanjilG_30771	OIW07694	ethylene-responsive transcription factor 1B-like	LG07	13691746	13692444	195.572	3.28049	5.29556	2.84776	3.5629	4.05203	2.80331	4.37384	8.29904	3.27462	4.63727	9.08	0.0907520465250327	0.00102387506635809	0.389899337544428	0.130470126128005	0.0242224143246977	0.169233695358831	0.044818411247532	5.32413580212811e-11	0.17898757023393	0.00815200665855674	4.48599422343579e-09	0	1	0	0	1	0	1	1	0	1	1
TanjilG_31085	OIW21217	CBL-interacting serine/threonine-protein kinase 6-like	Scaffold_81_24	11399	12664	1100.03	2.65634	3.73698	1.55803	1.65634	3.14841	1.28454	2.25418	5.1252	1.43842	0.476382	6.81764	0.0302945520931547	0.000301499201934421	0.561685523824777	0.386704591992166	0.00374270476456004	0.494796030555569	1	7.46013372277766e-15	0.433165104881442	0.0430622706590216	1.77375068901921e-08	1	1	0	0	1	0	1	1	0	0	1
TanjilG_31152	OIV92233	MACPF domain-containing protein NSL1	LG19	4929013	4933199	137.307	-0.035547	1.8389	0.148202	0.871642	3.26225	2.44983	2.24433	2.65696	-0.100617	2.19445	2.50621	0.992783508851695	0.0215775194156068	1	0.622986177977121	1.90598025735387e-06	1	0.01421683492549	0.000136445972797069	0.00176076483502648	0.00214851695661615	6.61025571887813e-05	0	0	0	0	1	1	1	1	0	1	1
TanjilG_31526	OIW18386	protein LlR18B-like	LG01	23432208	23433483	4635.61	3.06358	0.185592	5.20244	5.2075	3.09603	0.291266	0.168777	2.71035	1.18715	0.575739	4.64423	0.00800956305305303	1	3.30456962596737e-07	4.56954035089539e-08	0.00384585553970309	0.624807326818269	1	2.00071098310837e-07	0.965207281169833	0.988658723032094	0.00685653426122413	1	0	1	1	1	0	0	1	0	0	1
TanjilG_31537	OIW18397	stress-induced protein SAM22-like	LG01	23332105	23332834	90740.8	1.31018	2.60772	2.24097	1.74671	1.74595	0.0204506	2.16171	3.56652	0.38139	2.23036	3.90091	0.107231522480111	2.37526117434722e-05	0.00259698185876506	0.0225729769794028	0.0125375396899727	0.900937573915409	0.00192530073761544	5.83998450637155e-13	1	0.000748634010524219	1.1717081347782e-10	0	1	1	0	0	0	1	1	0	1	1
TanjilG_31968	OIW02219	purine permease 1-like	LG11	6993611	6996531	780.868	0.53907	2.66345	2.71614	3.26535	1.84505	1.21682	1.65668	5.45581	1.53723	2.8892	5.41456	0.793091887573163	0.00179712155395715	0.00663146535549968	0.000138740180698579	0.07385541827344	0.260302832188918	0.00204927460627422	1.17595799494298e-14	0.317814998061943	0.0685329578588779	2.59183225674188e-14	0	1	1	1	0	0	0	1	0	1	1
TanjilG_32071	OIW09922	probable WRKY transcription factor 41	LG06	12432449	12433741	619.239	0.398044	2.07544	-1.11118	2.64687	3.86384	1.88517	1.66754	2.94716	-2.74796	2.71331	3.37359	0.916215098853963	0.0649078434119531	0.733782664811918	0.0165925755914703	1.38191009350483e-05	0.0207615391053633	0.02428607924533	6.5798359912309e-05	0.122754026631597	0.116129257716674	0.000906027928018568	0	0	0	1	1	0	0	1	-1	1	1
TanjilG_32100	OIW09951	probable WRKY transcription factor 29	LG06	12896150	12897606	81.7417	2.11623	3.72568	0.906735	3.07926	2.48101	2.018	2.55641	6.40565	1.16538	0.784703	4.58942	0.113470701392009	0.000968946399254005	0.874882168155319	0.0128794597734112	0.045100956491888	0.663183571952189	1	1.25468405929825e-06	0.17495363248474	0.0244311661245083	2.55930322608723e-09	0	1	0	1	1	0	1	1	0	0	1
TanjilG_32599	OIW04407	PREDICTED: uncharacterized protein LOC109356012	LG09	19671774	19672358	20.5071	1.73073	4.15856	5.24454	2.49581	4.3538	0.458853	2.9661	4.30343	1.84163	2.31137	3.12746	0.317214536737888	0.000736219516428784	0.00475811395786203	0.0937290768530769	4.77107256050282e-05	0.262577140976928	0.139363648926243	0.000147011368665719	0.852104413210531	0.00211088993356584	7.18047172691734e-06	0	1	1	0	1	0	1	1	0	0	1
TanjilG_32615	OIW04423	protein YLS9-like	LG09	19796672	19797409	140.421	2.76716	4.01545	1.86246	1.48072	4.46496	4.6287	4.12715	7.37512	4.04476	2.67756	8.21603	0.17282276215374	0.0189398742992312	0.719759587646459	0.77050752680063	0.00943862425932304	0.0539856987229251	0.573934754754645	1.0077028631547e-09	0.0108202647695808	0.0121202278147006	4.67755786088105e-07	0	1	0	0	1	1	1	1	0	0	1
TanjilG_32870	OIW17003	probable WRKY transcription factor 40 isoform X2	LG02	9766290	9768294	470.417	1.43924	2.13786	-0.557245	2.14901	2.61459	2.23707	1.41409	2.17848	-0.302889	1.90505	2.00519	0.223740262847975	0.0284867854852346	0.950548943312675	0.0470034358850905	0.00341574987850238	0.987202624109411	0.195592515993289	0.0162887338083043	0.0271881439754328	0.157587600303885	0.0100024332450457	0	1	0	1	1	1	0	1	0	0	1
TanjilG_32996	OIW14654	Glyceraldehyde-3-phosphate dehydrogenase, cytosolic	LG03	25999138	26002487	1355.87	4.062	5.07556	2.53534	1.57384	1.8267	2.36842	1.89131	2.95851	2.68118	1.99014	6.21994	7.29172291556193e-05	1.85115446599663e-08	0.0730719186846861	0.378035727830449	0.171109451725751	0.0380826596226329	0.304391068543561	5.57810762171376e-14	0.0465915954232724	0.079746251059262	0.00148176786562728	1	1	0	0	0	1	0	1	1	0	1
TanjilG_00058	OIW16573	B3 domain-containing protein At2g36080-like isoform X1	Scaffold_1_87	15273	23093	49.0099	4.07674	3.45621	2.28159	3.36154	1.48901	1.6407	2.34219	5.54187	0.796807	1.70796	6.48551	0.000498233324474879	0.003182265285192	0.256573382939146	0.0839216322161731	0.485534769970772	0.862425649831666	0.659113794354414	9.4831277197281e-10	0.315629100173808	0.0433878505442622	3.82764457937177e-08	1	1	0	0	0	0	1	1	0	0	1
TanjilG_00342	OIW17748	cytochrome P450 71A1-like	LG01	34721178	34723573	616.352	0.396814	1.02111	1.25009	3.32924	2.10077	-0.442673	2.26668	2.49832	0.435216	1.13296	2.87729	0.850375310183787	0.335032239943643	0.423410014139732	1.49401001801074e-06	0.0056809441780344	0.896340529402051	0.663178419795497	5.24678870799459e-06	0.79015736654786	0.00154828860690316	0.000162774685784318	0	0	0	1	1	0	1	1	0	0	1
TanjilG_00545	OIV96963	inositol-tetrakisphosphate 1-kinase 1-like	LG15	14539775	14540737	201.202	3.04093	3.21329	1.18347	0.664248	0.686141	2.43586	1.37529	3.58975	3.10388	1.27225	6.37769	0.020472211852909	0.00848438058317938	0.798036860322884	0.924597096264539	0.85646971596024	0.0388382132217819	0.933641650441637	4.16703189884261e-11	0.0938061304128366	0.341981749783143	0.000825436589859799	1	1	0	0	0	0	0	1	1	0	1
TanjilG_00697	OIW04137	probable tyrosine-protein phosphatase At1g05000 isoform X2	LG09	20808339	20811088	587.385	0.206002	2.66756	1.55328	2.42428	1.63601	0.837256	2.16235	3.73386	0.170964	1.59139	2.90094	0.945314856079783	5.62803176014278e-07	0.0474460430395515	1.4405389954598e-05	0.00767942636190821	1	0.0312627889158737	2.42290924514187e-09	0.313936284880425	0.000108454525442227	9.01430330078531e-15	0	1	0	1	0	0	1	1	0	0	1
TanjilG_00929	OIV92795	expansin-like B1	LG18	14506918	14508505	101.751	3.93406	1.30174	2.49902	2.10275	1.92461	-0.765389	2.57291	6.48895	0.999293	-1.15929	2.40537	1.27047187667787e-05	0.32479846116497	0.0266672493511495	0.0543992878745841	0.050685864952531	0.658039199497691	0.826506580581879	0.00180291595975976	0.631494930607141	0.00323397453740228	7.56342942014963e-20	1	0	1	0	0	0	1	1	0	0	1
TanjilG_00940	OIV92806	expansin-like B1	LG18	14630954	14632845	539.407	3.53671	0.755514	1.41111	0.358562	0.0607926	3.74798	2.17571	5.23444	0.396447	0.296102	5.06521	0.00139139949222369	0.737164231711418	0.622800614855836	0.995989711168723	1	0.975805624367075	1	9.03014651381039e-09	0.000557195716416821	0.0481742651839495	4.05675535762388e-09	1	0	0	0	0	1	1	1	0	0	1
TanjilG_01113	OIV99138	organic cation/carnitine transporter 4-like	LG13	4308855	4312114	236.245	2.88143	23.3518	6.15685	20.4815	23.1088	3.60031	1.8949	9.03431	2.67249	2.94079	10.6775	0.319273551377369	8.62204276925916e-30	0.0730570788802558	2.45060626083095e-22	6.1081609843695e-29	0.526476818930667	0.737984957591378	4.60619679510997e-09	0.209232738452783	0.495916870830013	1.17549425594484e-06	0	1	0	1	1	0	0	1	0	0	1
TanjilG_01309	OIW09338	ABSCISIC ACID-INSENSITIVE 5-like protein 1	LG06	29626563	29628032	29.9157	2.21717	5.65946	5.13385	0.593429	5.48822	0.521568	2.73377	6.17978	0.390747	2.76976	7.79911	0.232360516102887	0.000499604904822294	0.0415585044598623	1	0.0147032453756136	1	0.426470586283776	1.45348022742254e-08	0.918540471817796	0.0910394083594157	5.52168064761824e-06	0	1	1	0	1	0	0	1	0	0	1
TanjilG_01322	OIW09351	F-box protein At2g27310	LG06	29689328	29690281	460.39	2.07574	2.53066	1.17605	0.791764	2.29583	1.37018	1.09654	3.56131	1.04696	1.40035	3.20027	0.00731913382828951	0.000229477487842918	0.463206688871232	0.672703663513342	0.00118434908171382	0.417757176485526	0.306985906541899	8.5966605066263e-08	0.125584529022942	0.175658421483599	3.70130355964443e-09	1	1	0	0	1	0	0	1	0	0	1
TanjilG_01518	OIV90064	PREDICTED: uncharacterized protein LOC109335321	LG20	21416197	21416908	179.23	0.718948	2.00167	1.52669	2.46033	2.24054	0.712706	1.558	3.51799	0.963948	1.68089	4.33825	0.554713715392772	0.00645122288517287	0.191305100038274	0.00125113243236418	0.00172626128038041	0.492772791273267	0.111906052294773	1.98394364925757e-13	0.54828078008267	0.0329493280128201	6.67995386680572e-09	0	1	0	1	1	0	0	1	0	0	1
TanjilG_01638	OIW04465	trehalose-phosphate phosphatase B-like	LG09	18500210	18503044	33.8524	5.64355	6.09756	1.46024	7.80226	2.56505	5.48657	0.684153	6.49859	1.76233	2.95245	9.12293	0.0191875661299959	0.0049898423349673	0.921366713500937	0.00524296442149653	0.511149173977244	0.788820649761573	0.817118845268029	4.80398132348076e-05	0.08641501808001	0.905735917174731	0.00521262295492337	1	1	0	1	0	0	0	1	0	0	1
TanjilG_02118	OIV89927	U-box domain-containing protein 21-like	KV862211	18456	19757	63.2982	3.24515	4.95797	0.884071	3.18787	4.5737	2.06537	5.64394	8.77892	0.676687	3.65448	7.86679	0.0612565078156678	0.00121122302195743	0.957023833818103	0.12192513262063	0.00373464559252519	0.946825809078089	0.104241387534439	7.85801854119994e-09	0.322129234555493	0.000811910787484876	2.1778477772518e-07	0	1	0	0	1	0	1	1	0	0	1
TanjilG_02215	OIV92452	epidermis-specific secreted glycoprotein EP1-like	LG19	1192774	1194063	2014.31	0.917285	2.6336	2.62006	1.89349	2.78893	1.47927	1.73227	4.86642	1.84656	2.86204	7.0673	0.637289553364612	0.0187328980356294	0.0730570788802558	0.239864454793652	0.0111764701356992	0.274016738960903	0.028374290196189	7.68720384938642e-17	0.318149698006644	0.132740555015762	4.25322789524503e-08	0	1	0	0	1	0	0	1	0	1	1
TanjilG_03079	OIW08403	myb-related protein Myb4-like	LG07	3296074	3297309	147.049	1.97339	4.0205	-4.32613	1.99728	5.88272	2.88814	2.45129	3.45793	-2.64957	4.74786	4.52129	0.450649536821365	0.0252094411503583	0.0486148969738424	0.581949194018361	0.000182572544660438	0.340937860618985	0.0618413497923958	0.0024559579425554	0.18552965626388	0.189620254840941	0.0318353809900504	0	1	-1	0	1	0	0	1	0	0	1
TanjilG_03116	OIW08440	probable WRKY transcription factor 31	LG07	2925770	2928299	271.051	2.04957	2.6577	1.86396	2.24525	4.4855	1.96731	2.26041	4.66616	0.642372	1.79225	6.70379	0.108074100398278	0.0160177211968198	0.368317149918289	0.111529786209524	5.63189819897095e-06	0.884968241916025	0.510345438220015	1.06125963766185e-14	0.133367542050652	0.0344061563195822	1.59824698175483e-07	0	1	0	0	1	0	1	1	0	0	1
TanjilG_03637	OIW05248	transcription factor MYB76-like	LG09	3835426	3837548	53.1243	0.643696	3.65056	2.54544	3.69839	3.00357	0.479365	2.50338	3.43139	-0.191491	1.52136	6.03607	0.877398967928538	0.00886678374393732	0.288565352402314	0.0155366546808697	0.040915698206366	1	0.907164943978956	2.92926307327002e-07	0.944514738143722	0.0708049696142341	0.00533930373146457	0	1	0	1	1	0	0	1	0	0	1
TanjilG_03639	OIW05250	protein of wound-induced	LG09	3793329	3793610	479.336	0.156762	3.79562	1.96848	3.18054	2.11085	2.16691	3.34789	4.83493	1.98755	1.62999	6.75326	0.992783508851695	0.00351281573727897	0.521376023949912	0.0459629034301998	0.261742159713169	0.376693590294883	0.858891438227127	3.24163169984187e-10	0.202065234767219	0.00878865893562972	1.92592601748896e-05	0	1	0	1	0	0	1	1	0	0	1
TanjilG_03800	OIV93837	putative lipid-binding protein AIR1	LG17	20811045	20811512	880.48	3.23348	2.76965	2.82921	2.74148	0.962102	1.4461	1.66922	4.99745	1.51068	0.382304	6.24051	0.00702678047595565	0.0180856564784181	0.0587313358530381	0.0427675045604351	0.70341724609485	0.471958487927755	1	3.49128799070946e-12	0.365748604915342	0.177245217940869	8.63558221006565e-08	1	1	0	1	0	0	0	1	0	0	1
TanjilG_04076	OIW06682	senescence-associated carboxylesterase 101	LG08	10457674	10460870	1680.79	0.805832	2.35064	1.11901	1.36073	2.89989	1.81427	2.08121	2.68213	0.069148	1.38895	3.10144	0.304432651510651	4.79388653028148e-06	0.256312971470421	0.0458840234627138	3.13383110928444e-09	1	0.0664410807185896	1.58584189331781e-11	0.00222852396870268	9.84550603045054e-05	1.57700416596895e-08	0	1	0	0	1	0	1	1	0	0	1
TanjilG_04302	OIW15767	protein indeterminate-domain 9-like isoform X1	LG03	529627	531409	90.7191	0.712139	3.75222	1.08393	3.05242	2.16837	2.18791	2.48997	3.51593	2.39704	1.61825	5.605	0.819535853545226	0.00180754848612034	0.839791003139066	0.0457372895922596	0.195202977531885	0.290479568486032	0.865794868905377	1.01100505717143e-07	0.144386166654738	0.0419220807665259	0.0010676151813467	0	1	0	1	0	0	1	1	0	0	1
TanjilG_04498	OIW15963	receptor-like protein kinase HSL1	LG03	1911323	1915422	208.722	1.50577	3.24128	2.43532	0.820954	1.11916	1.31442	1.73605	3.79223	1.42218	2.463	5.84172	0.182206674079327	9.39665542459019e-05	0.0286950989919538	0.753817451645241	0.4549491421036	0.396623454380612	0.0239069617330683	3.2012885519744e-15	0.274398949835585	0.0577664331319407	3.81566763587251e-07	0	1	1	0	0	0	0	1	0	1	1
TanjilG_04506	OIW15971	E3 ubiquitin-protein ligase ATL42	LG03	1973886	1975133	35.0314	2.01663	4.08099	2.42188	3.11796	2.92577	1.79219	1.97261	6.22593	1.88164	2.11167	5.4551	0.149350178895672	0.00214145741541863	0.197309860944496	0.0330802098329142	0.014653066510916	0.317173529963237	0.40346017130097	2.2736006444193e-08	0.222233943220954	0.0963867640841275	2.50787516830843e-08	0	1	0	1	1	0	0	1	0	0	1
TanjilG_04645	OIW12481	G-type lectin S-receptor-like serine/threonine-protein kinase LECRK4	LG04	27281816	27284113	278.742	2.70568	2.16053	1.41832	1.68123	1.27145	1.66794	2.2467	4.27453	0.41262	1.59708	5.09577	0.00228162786658763	0.01553456732099	0.422045327404548	0.151643690042214	0.30321898890043	0.940730114507072	0.36612851786558	1.87482926559164e-13	0.111250247660935	0.00717276943016006	1.68104216259725e-09	1	1	0	0	0	0	1	1	0	0	1
TanjilG_04759	OIW12595	NAC domain-containing protein 30-like	LG04	26514138	26517340	177.091	5.64941	2.63526	4.53795	2.78999	2.5315	2.18113	3.73877	5.08083	0.638919	2.55275	2.95008	2.60760366298456e-05	0.103904221079008	0.00311054869745746	0.141153254103142	0.327255801075599	0.940427062396505	0.367950645288292	0.0215989039334728	0.220185480998065	0.00466443212540167	1.59640600697666e-05	1	0	1	0	0	0	1	1	0	0	1
TanjilG_07139	OIV97387	putative transcription factor bHLH041	LG15	1656860	1658595	120.329	3.03264	2.0627	3.81973	2.62653	6.33325	4.08781	0.343115	3.86359	3.30867	3.87826	7.78588	0.0911746821781709	0.311038447858162	0.0739342287895363	0.259105194642403	5.47360067912201e-06	0.124974844603182	0.0463311179210264	1.60179078671009e-09	0.0111261337937001	0.952028028549879	0.00463544124117604	0	0	0	0	1	1	0	1	0	1	1
TanjilG_07333	OIV98898	homeobox protein knotted-1-like 2	LG13	7613817	7616758	1537.84	0.421363	2.72551	0.814495	1.14119	2.30407	2.14566	1.71494	2.48605	0.39028	0.735988	2.80087	0.819819615838936	6.59198450477347e-05	0.743497304579082	0.367566354138254	0.00112408306254835	0.917450724581756	0.951814590228457	6.54522149335566e-06	0.00608517386582722	0.0194315570896007	0.000126758684698152	0	1	0	0	1	1	0	1	0	0	1
TanjilG_07491	OIV95335	probable WRKY transcription factor 47 isoform X1	LG16	16590923	16608249	234.034	1.01044	1.79314	0.568181	2.17034	3.05473	0.446172	2.2	2.86534	0.121736	1.52998	2.32627	0.170716476692869	0.00132679764606641	0.793584378182047	5.69147503074564e-05	1.04342847130302e-09	1	0.0263874912635756	6.4389643750455e-07	0.669131397838391	2.53549886286057e-05	7.39877281183631e-10	0	0	0	1	1	0	1	1	0	0	1
TanjilG_07618	OIV88994	cytochrome P450 77A3-like	KV862927	79195	80733	725.115	-1.10957	-0.787847	-1.60806	-2.91482	-4.29703	-0.811301	-2.31967	-4.52194	-0.671714	-0.123847	-2.00147	0.410239459404717	0.640412045992898	0.364563431391481	0.00172673603890437	8.94315282774368e-08	0.824741049733479	1	0.0190702060710217	0.610391254070743	0.00950226110734845	3.00607831529213e-09	0	0	0	-1	-1	0	-1	-1	0	0	-1
TanjilG_07772	OIW04637	PREDICTED: uncharacterized protein LOC109357536	LG09	15238877	15240304	407.2	0.665184	2.00177	0.530798	1.60873	5.16715	3.42542	1.81404	2.71788	1.81741	3.86881	2.43159	0.798588950338235	0.12867272161372	0.990529000356309	0.417746515001742	7.18886106229644e-08	0.310598378085975	0.000704817007546152	0.0156943680058148	0.00284243533114195	0.124345462271783	0.00731946192239789	0	0	0	0	1	1	0	1	0	1	1
TanjilG_08054	OIW13712	GDSL esterase/lipase At5g45910-like	LG04	9151410	9155148	130.983	-0.310082	-0.408819	-1.48695	-4.07897	-6.76513	-1.25008	-3.40949	-5.03593	-0.29647	-0.23326	-2.42337	0.984025594179447	0.946368770544776	0.715595756370259	0.00248262549229781	0.000444677448053287	1	1	0.0488264153180686	0.547000814066225	0.00706573675063148	2.00429193916461e-05	0	0	0	-1	-1	0	-1	-1	0	0	-1
TanjilG_08113	OIW21703	translocator protein homolog	Scaffold_168_109	2826	3449	83.8012	5.80005	3.48145	0.550586	1.32909	4.15324	-2.09859	2.07796	11.1089	-1.20573	2.05254	6.87457	0.00591378017082774	0.0242321817236301	1	0.749443643794312	0.00247717822924366	0.813682563734782	0.756716763295989	4.33065573953249e-08	0.29883864865096	0.204217945344316	2.31255448715139e-10	1	1	0	0	1	0	0	1	0	0	1
TanjilG_09093	OIW19309	cell number regulator 1-like	LG01	4450286	4450582	32.2891	0.305338	2.95205	0.610078	0.514836	2.92972	1.9825	2.86586	4.05669	2.427	1.74575	5.35277	0.977398783037088	0.0159562879502478	0.982866698006441	0.962664001512042	0.0208034761687832	0.27963280586824	0.855713328357747	1.58367889257075e-06	0.176128268119685	0.0134973882560263	4.96457748349182e-05	0	1	0	0	1	0	1	1	0	0	1
TanjilG_09309	OIW13958	PREDICTED: uncharacterized protein LOC109345290 isoform X1	LG04	5968960	5970988	531.908	1.61352	1.86206	1.57767	5.07354	2.7854	1.12709	2.03347	2.9303	1.41263	1.55611	3.73179	0.143970672658766	0.0619568772689874	0.349776375776214	5.83042865704076e-11	0.000996071735385868	0.339068463008243	0.442707506312018	3.2798444560242e-07	0.378897415168218	0.0200834676614934	0.000165393074595811	0	0	0	1	1	0	1	1	0	0	1
TanjilG_09455	OIW19435	probable xyloglucan endotransglucosylase/hydrolase protein 23	LG01	2721134	2722384	26.8333	1.89109	7.3593	2.13357	6.22789	4.61933	-0.359204	3.72858	7.83813	1.75472	1.91835	6.87758	0.57255304013173	0.00132561470345661	0.700627410332478	0.0207337613843572	0.0365542263775233	0.823528664313538	0.976679574020923	1.16442195873636e-05	0.991948764821837	0.0514932703728002	4.62369228754499e-05	0	1	0	1	1	0	0	1	0	0	1
TanjilG_09559	OIV98066	PREDICTED: expansin-A8-like	LG14	10407737	10409728	141.683	2.39372	4.13913	5.37693	4.29703	1.78542	1.65534	2.6881	3.7257	-0.12952	1.21715	4.68529	0.205116179713812	0.005167149091522	0.00144325388281025	0.0123237226464673	0.501977124781664	1	0.977478887146612	0.00029070952818686	0.456290624371242	0.0796136951064198	0.00616860967028994	0	1	1	1	0	0	0	1	0	0	1
TanjilG_09572	OIV98079	PREDICTED: uncharacterized protein LOC109326509	LG14	10607013	10607501	51.9808	2.84011	4.19969	2.47607	2.09631	3.88703	1.76229	2.08345	3.68689	1.29839	1.84239	4.99081	0.0406604129516097	0.000963831245551736	0.346298916321577	0.334561545844357	0.00208747989726925	0.64938591594379	0.705944259437071	1.66648260222207e-06	0.292842247193134	0.126110772480035	0.000834346805319353	1	1	0	0	1	0	0	1	0	0	1
TanjilG_09726	OIV96299	ornithine decarboxylase-like isoform X1	LG15	20620533	20621855	251.029	-19.9784	-6.52869	4.9252	20.567	19.1351	6.47547	-3.65939	-8.97833	1.78549	2.57739	6.3927	2.93502648524867e-10	0.116749911906429	0.516736622200317	2.76833542650093e-11	4.97203735368329e-09	0.901417487797926	0.983525254623233	0.0336504526799129	0.10281388756671	0.356810531065063	0.00186964940263743	-1	0	0	1	1	0	0	-1	0	0	1
TanjilG_09779	OIV96352	transcription factor MYB44-like	LG15	20298099	20298791	53.0029	1.69312	3.19071	0.487212	1.41804	4.85471	2.67289	7.08142	5.08921	0.361075	1.02597	3.29932	0.384840024704993	0.0284811509083452	1	0.680830898149544	0.000156683943308351	1	1	0.0065380788999573	0.0965449135807112	9.78235207936447e-05	1.029185287154e-05	0	1	0	0	1	0	1	1	0	0	1
TanjilG_09845	OIV96418	probable WRKY transcription factor 50	LG15	19898744	19899546	92.0867	2.50421	3.36406	2.52053	2.35466	4.39847	4.68413	6.89545	2.9431	6.00581	3.98393	5.78917	0.304905059461891	0.0904444784530197	0.554137882059123	0.476298890240388	0.0144801556941761	0.0436184395060054	0.134170182773553	0.000134094065192239	0.0124987068508388	2.67838416466378e-05	0.0904098205839609	0	0	0	0	1	1	1	0	1	0	1
TanjilG_09975	OIV92377	G-type lectin S-receptor-like serine/threonine-protein kinase At4g27290	LG19	2134801	2138430	105.828	0.396366	-0.797103	-1.07663	-2.43076	-3.54129	-1.32306	-3.80539	-4.74515	-1.73113	-0.161135	-2.36794	0.899818542136573	0.6477945618122	0.717970412234739	0.0216258576293415	1.88098892818722e-05	0.225103680744461	1	0.00559080838732526	0.331081874421718	8.56732396822839e-05	1.298066819063e-07	0	0	0	-1	-1	0	-1	-1	0	0	-1
TanjilG_10325	OIW19144	probable L-type lectin-domain containing receptor kinase VI.1	Scaffold_2_401	3294	5345	112.393	1.28646	1.85665	1.50363	1.7289	4.96623	2.50837	2.77174	4.49317	1.94668	3.03202	5.15022	0.463422488638456	0.20367081569259	0.620823787637505	0.395325143425692	1.82919652176388e-06	0.299347926208718	0.0358891504720617	8.38070151623207e-08	0.059819913196918	0.0151637017529437	5.0630538769345e-06	0	0	0	0	1	0	1	1	0	1	1
TanjilG_10340	OIW01179	alcohol dehydrogenase-like 4	LG11	33137004	33143510	245.807	3.03821	3.29696	2.11072	1.06047	2.11248	1.56055	3.06712	5.14979	0.654081	1.32764	5.2546	0.0367926571728208	0.011695822695657	0.407892351850366	0.80768621658117	0.205234988341909	0.916022207122846	0.932012565650836	2.21955834140078e-07	0.38153549501525	0.0144325373965854	9.0958470272407e-07	1	1	0	0	0	0	1	1	0	0	1
TanjilG_10508	OIV92298	hypothetical protein TanjilG_10508	LG19	2833475	2833777	91.4137	0.788496	2.46031	0.232552	1.16176	2.85973	1.61301	1.80099	3.09793	1.61885	2.94536	3.04218	0.469421574695895	0.000416875959990959	1	0.322233529381085	6.90433148828598e-06	0.118453394033925	5.36996718643929e-05	4.82559677513706e-07	0.0515924451163783	0.010440810687922	3.69722250934006e-07	0	1	0	0	1	0	0	1	0	1	1
TanjilG_10705	OIV90405	protein yippee-like At4g27740	LG20	14856422	14857454	186.887	-0.485447	2.04069	1.52902	1.64021	4.51882	3.40832	4.6985	2.97666	3.24309	3.00044	5.38175	0.946468559436871	0.296802691089473	0.758799114009564	0.62187475074627	0.000976944514126703	0.342615953628348	0.267228160614925	1.1194873445474e-05	0.0381472176772293	0.000639356697200852	0.0306467532688399	0	0	0	0	1	1	1	1	0	0	1
TanjilG_10735	OIW15295	PREDICTED: uncharacterized protein LOC109342349	LG03	13905491	13905844	162.882	2.81212	2.28114	1.19034	2.57575	4.43528	2.46787	3.58084	5.39456	0.740992	2.89079	6.63506	0.0263896623655623	0.0846124204192434	0.769392584028781	0.0729832022182065	2.02610145476964e-05	0.867661772678786	0.0530288493090392	1.39411696871373e-12	0.0644931591624369	0.00114585585509284	3.69083348879778e-08	1	0	0	0	1	0	1	1	0	0	1
TanjilG_10897	OIV95077	LOB domain-containing protein 12-like	LG16	19912964	19914174	15.3188	5.80028	3.1186	6.90403	5.36072	2.6248	3.14602	4.27698	7.21807	0.0482621	3.7837	9.65675	0.0414078122482911	0.216462534732029	0.0248830658666819	0.0980200581644791	0.562407974849988	1	0.327282370240987	3.15790527450524e-06	0.420705850692334	0.0478112320221807	0.00127105820091926	1	0	1	0	0	0	1	1	0	0	1
TanjilG_10976	OIW21800	ABC transporter B family member 13-like	Scaffold_209_27	5348	10859	1057.73	-0.570669	-1.12776	-1.66541	-3.94978	-5.92452	0.220592	-3.67359	-5.08793	-0.428258	-1.01186	-2.77806	0.885040696874048	0.61203812886269	0.606168403618298	0.00180985013988335	5.48189956003631e-08	0.985414798771008	0.982900916127438	0.0168848631422841	1	0.00194130614224462	1.40047317591139e-06	0	0	0	-1	-1	0	-1	-1	0	0	-1
TanjilG_11119	OIW20420	UPF0481 protein At3g47200-like	Scaffold_21_120	26843	28219	118.116	0.640833	2.80682	1.62652	2.54464	2.2005	1.77586	2.521	2.5733	0.760342	1.54238	1.97185	0.774871986337617	0.0026983883823771	0.400499465488824	0.0219711227059355	0.0353070838300386	0.786498625303347	0.547900928278975	0.0227664444194106	0.126003456492932	0.00586454501464195	0.00257843368091944	0	1	0	1	1	0	1	1	0	0	0
TanjilG_11213	OIW02319	probable WRKY transcription factor 53	LG11	5540140	5542268	295.192	-0.077376	1.82901	0.549582	1.06632	3.46906	4.72353	2.14255	2.99882	1.05209	1.90134	3.08989	0.992783508851695	0.0900740520907352	0.958109651110108	0.62349453013251	3.91650785799596e-05	0.616783919468534	0.240489855528318	0.000114814101589852	2.63751770578213e-08	0.0205817406153134	0.000275132322535156	0	0	0	0	1	1	1	1	0	0	1
TanjilG_11512	OIW06787	putative Myb family transcription factor At1g14600	LG08	8665131	8670500	568.28	1.05205	1.7531	1.47138	3.11368	1.68148	2.11697	2.6218	3.20033	0.602876	1.97154	3.32244	0.26130277864149	0.0171941342606838	0.186878176026731	1.02166145280091e-06	0.025871323337956	0.765677451149659	0.0187781130894459	6.83631591040979e-09	0.00449657240231991	5.76926521438771e-05	4.29747460445809e-08	0	0	0	1	0	1	1	1	0	0	1
TanjilG_11693	OIW06006	probable protein phosphatase 2C 58	LG08	21862547	21869463	120.351	1.32677	3.22489	1.3418	2.70449	2.08821	-0.0620453	1.07183	2.79086	-0.247838	0.97255	2.77966	0.275127655391253	0.000176557780755206	0.548674177340001	0.0270799984716188	0.0475607372694786	1	0.933641650441637	0.000365009657805747	1	0.326445147730486	0.000526045039314412	0	1	0	1	1	0	0	1	0	0	1
TanjilG_12321	OIV97564	probable serine/threonine-protein kinase PBL11	LG14	16073448	16076150	127.33	1.04174	1.59231	0.450079	1.43559	3.90569	2.17595	2.39489	2.88436	0.111545	2.0156	3.07132	0.406662710690015	0.103228688343208	0.975808138784414	0.27509594538248	4.46888296784211e-08	1	0.0664410807185896	8.89852413013149e-06	0.0178170582868618	0.00248068243115706	6.96341705507946e-05	0	0	0	0	1	1	1	1	0	0	1
TanjilG_12542	OIV97785	protein CUP-SHAPED COTYLEDON 1-like	LG14	14524531	14526332	28.0572	11.1434	41.2093	1.65089	7.32067	2.17031	42.3842	0.506356	3.82558	0	-1.99726	5.50486	0.00145113361392649	1.12135666129632e-58	0.945452131397458	0.0392932395822363	0.720052283471001	1	0.998569103390663	0.0388144523363562	2.51851302423271e-70	0.97202617558224	0.174275136739892	1	1	0	1	0	1	0	0	0	0	1
TanjilG_12734	OIV89648	hydroquinone glucosyltransferase-like	KV862266	794893	796287	313.201	0.519185	2.46709	1.35969	1.50473	2.67233	1.76828	1.18513	2.83951	0.936362	2.20141	3.65004	0.776520851604912	0.00171788324313423	0.411571642740891	0.200950892775951	0.000454652385327223	0.585479548565209	0.0271891343269694	3.70818837310987e-08	0.0610907094285074	0.191251838951857	5.05214300433309e-05	0	1	0	0	1	0	0	1	0	1	1
TanjilG_12735	OIV89649	hydroquinone glucosyltransferase-like	KV862266	852074	853486	633.246	0.372265	2.6202	1.23142	1.44352	2.73485	1.6351	0.970869	2.78147	1.05296	2.21962	3.7352	0.876591339794467	0.000430685137300825	0.474075583337313	0.206814456741766	0.000155739956660275	0.477382979632753	0.0172632957519316	4.94898839202742e-09	0.0787519054641316	0.294234651022117	4.05642874928012e-05	0	1	0	0	1	0	0	1	0	1	1
TanjilG_12744	OIV98621	loricrin-like isoform X1	LG13	16566035	16566361	68.9932	3.35585	6.72002	5.37049	5.76724	7.78581	3.98923	7.90265	9.51789	3.83463	2.41929	8.22903	0.322037238285309	0.00918368490027388	0.177198135899869	0.064707709949315	0.00127014649643568	0.257222151397131	0.876893430457132	1.05353975137936e-06	0.123398349000048	0.000949359975890015	2.78068595151784e-06	0	1	0	0	1	0	1	1	0	0	1
TanjilG_13180	OIW18428	oligopeptide transporter 3	LG01	20242687	20245906	2653.38	-3.02211	-2.64222	-1.40402	-0.575841	-0.134071	2.45298	0.237492	-2.15853	0.488898	0.0788192	-2.55748	0.000695610958437368	0.00183053762763554	0.45467825372223	0.878332794630797	1	0.901152803231326	1	0.000707734293576527	0.00808531097768935	0.926367672714574	0.00732054346138725	-1	-1	0	0	0	1	0	-1	0	0	-1
TanjilG_13477	OIW18725	IQ domain-containing protein IQM1-like isoform X1	LG01	22523006	22526284	702.712	1.82024	2.03837	1.40947	1.94226	3.96445	3.34983	3.00911	3.97159	0.745259	2.63097	4.98056	0.226499404299341	0.14876415425391	0.678598379124906	0.286350375352055	0.000196479339007909	0.868930573736819	0.111392696452162	1.52503540691667e-07	0.00585036988018971	0.0071416885844454	7.5682829755843e-05	0	0	0	0	1	1	1	1	0	0	1
TanjilG_13507	OIW18755	probable serine/threonine-protein kinase PBL8	LG01	22751052	22753100	500.96	1.12168	2.79273	0.717881	1.81266	3.09406	1.65898	2.23769	3.8087	-0.848308	1.90946	4.58671	0.34474554140666	0.00047482239767853	0.858390274210644	0.0925419320782581	5.73712857557263e-05	0.67409380936374	0.117329638579293	1.34254386680176e-11	0.104543479182392	0.00595659421850101	5.7908042993112e-08	0	1	0	0	1	0	1	1	0	0	1
TanjilG_13617	OIW02980	calcium-binding protein CML38-like	LG10	15970300	15970728	21.4538	3.42457	6.73512	-0.600457	0.675217	3.92501	5.30066	5.34683	4.51729	1.16964	4.48797	4.70277	0.127929134763156	0.00486590194467301	1	0.981646648101179	0.0606091326541026	0.864658393264341	0.355286854486573	0.00732762930040914	0.0159838343955814	0.0157288140797852	0.0186350256055829	0	1	0	0	0	1	1	1	0	0	1
TanjilG_13619	OIW02982	calcium-binding protein CML38-like	LG10	15956986	15957414	21.2097	3.42443	6.63005	-0.637485	0.625572	3.91086	5.30061	5.34667	4.51723	1.1836	4.48796	4.70276	0.129786201183437	0.0060669597777531	1	0.990365689590166	0.0633116638474107	0.862865216998448	0.357216549736185	0.00755622239100433	0.0163991742674434	0.0160115191648347	0.0190403247260861	0	1	0	0	0	1	1	1	0	0	1
TanjilG_13963	OIW15036	putative WEB family protein At1g65010, chloroplastic	LG03	22563215	22565044	140.31	0.75356	2.68912	1.41368	2.25345	2.36386	-0.397773	1.66583	4.4615	-1.02854	1.12158	5.25208	0.620163867305658	0.000372374809108029	0.345727103787831	0.00889432927195437	0.00197386135736468	0.523904060664622	0.727176350852391	6.68505474521367e-17	0.843584651043675	0.0399018565935972	4.4691666660809e-12	0	1	0	1	1	0	0	1	0	0	1
TanjilG_14026	OIW01995	PREDICTED: uncharacterized protein At1g66480-like isoform X2	LG11	11482294	11483587	190.317	2.31549	3.11481	2.29634	3.61037	2.48927	3.28662	2.01377	6.63382	0.466702	1.61872	6.12918	0.0929698419336009	0.0087320471898401	0.245300398181511	0.00365043033482896	0.0677458730692636	0.964745217489089	0.733597678719204	2.23345827381926e-10	0.00848020826432556	0.10383380603943	4.02942336424173e-11	0	1	0	1	0	1	0	1	0	0	1
TanjilG_14074	OIV97974	probable WRKY transcription factor 41	LG14	11703545	11705418	57.7683	2.09181	2.85233	1.33678	1.74705	4.93587	3.04345	2.44676	2.64742	-1.83917	2.62039	6.30205	0.209731682608477	0.0437771906209608	0.7790979819165	0.498332473538973	1.72483428257981e-05	0.427804813224136	0.255581266352463	2.1486217517295e-08	0.0398422032041774	0.0681525616932749	0.0331568527306601	0	1	0	0	1	1	0	1	0	0	1
TanjilG_14324	OIW11784	hypothetical protein TanjilG_14324	LG05	17184304	17184495	23.8535	1.05993	7.08008	3.66433	2.68858	7.4904	3.53706	6.98992	6.53653	3.93401	3.20009	6.43929	0.883160428372112	0.0141876212918903	0.53824910144649	0.678336120685869	0.00439400054995677	0.345247818691015	0.812831889166433	0.00283579539339359	0.265882870970693	0.0102568467650996	0.00801293025129299	0	1	0	0	1	0	1	1	0	0	1
TanjilG_14592	OIW02069	BON1-associated protein 2-like	LG11	9286399	9286929	90.5983	2.05672	4.6887	3.15158	7.39601	3.74835	2.70228	4.06252	5.12729	1.04227	2.09822	8.71428	0.401349878756068	0.0245772672671825	0.347216386712332	0.0017714229880474	0.116868310929989	0.877261942458552	0.93267793956945	1.52803800095927e-06	0.216533251635505	0.0164110799437729	0.000740533262717	0	1	0	1	0	0	1	1	0	0	1
TanjilG_14684	OIW03459	type IV inositol polyphosphate 5-phosphatase 11	LG10	5160883	5164473	140.513	2.81402	5.58887	1.85228	8.6672	4.54188	1.94711	1.93404	7.55134	1.0179	2.03251	8.40032	0.145499656828803	0.000381077344666623	0.689722572781396	5.41383844128899e-06	0.00311653173785005	0.883095335083553	0.817568389894402	9.09669233234634e-10	0.435642278500945	0.287767701231618	2.24944305312228e-08	0	1	0	1	1	0	0	1	0	0	1
TanjilG_15111	OIV90725	basic 7S globulin	LG20	7247777	7249096	462.191	2.45163	5.95977	3.30467	7.14803	6.87174	0.0963698	3.06053	9.07414	2.42953	2.98488	8.97604	0.313403394362204	0.00117979126296303	0.301632324380443	0.000537081935546184	5.68271861519277e-05	0.466514738145383	0.550679086218518	5.41150805536374e-10	1	0.107356432182428	3.88903877160952e-09	0	1	0	1	1	0	0	1	0	0	1
TanjilG_15226	OIW01901	probable pectinesterase 29	LG11	13797099	13801324	56.3601	4.64926	3.4145	7.83455	0.458013	5.16597	4.71472	3.343	8.59107	1.13442	1.8121	4.68824	0.0282542006833239	0.19317578828356	0.00458393384060688	1	0.0511483676426905	0.892272605514257	0.966094243521162	0.00645452753468767	0.0433315880999443	0.147499933850157	8.79504110186827e-07	1	0	1	0	0	1	0	1	0	0	1
TanjilG_15400	OIW12951	protein NUCLEAR FUSION DEFECTIVE 4-like isoform X1	LG04	23212303	23214102	206.853	1.2396	1.89471	0.72218	0.680471	1.56282	2.07534	3.71722	4.06567	0.905512	2.25624	4.87257	0.261651777742346	0.0367837199615852	0.852034192366209	0.805080759810205	0.143977612742283	0.633017404447488	0.0337009341489963	4.35888522209855e-12	0.0253580909608404	1.72369077236876e-06	5.35910818741031e-09	0	0	0	0	0	1	1	1	0	1	1
TanjilG_15513	OIV90780	myb-related protein Myb4-like	LG20	5977353	5978507	283.171	2.0374	3.24039	2.22603	1.99164	4.92853	2.05995	2.87624	4.64726	0.65222	2.2394	4.26289	0.15245110184464	0.00496273586877338	0.273114562674991	0.277108337015006	2.89952946270839e-06	0.899448616099419	0.297440796820645	1.21853463095626e-05	0.150622384330232	0.0106367493088982	1.80825961738671e-06	0	1	0	0	1	0	1	1	0	0	1
TanjilG_15647	OIW17064	probable inactive receptor kinase At4g23740	LG02	6272471	6275456	368.283	1.90421	2.76846	1.59681	2.47214	2.08583	1.93852	1.56548	2.70099	-0.158163	1.47205	4.77576	0.040325614905111	0.000358127427570127	0.256573382939146	0.00430629847590719	0.0154763514266897	1	0.404575066152135	5.62033865775607e-13	0.0353377203847918	0.061784421360766	0.000153739719491601	0	1	0	1	1	0	0	1	0	0	1
TanjilG_15979	OIW10607	mitochondrial uncoupling protein 5	LG06	4810857	4811804	461.466	0.953089	1.98092	-3.47937	-0.421896	2.87714	1.43555	1.857	2.47046	-0.999026	2.98847	2.03729	0.621187189655432	0.12152278339653	0.00311125355120059	0.975746515848683	0.00782912224459825	0.713109015484586	0.0194928756125142	0.0427126376330607	0.337841256700892	0.100487748583721	0.0133975156106913	0	0	-1	0	1	0	0	1	0	1	1
TanjilG_16208	OIV97447	amino acid transporter protein	LG15	604239	606178	259.887	1.75129	1.60998	1.18322	3.48789	2.2781	-2.27613	2.10448	3.55228	0.244592	1.08417	1.5894	0.0990424644097052	0.147648203993215	0.613000505241611	5.38412721593166e-05	0.0146393763905265	1	0.858499057096349	0.0600497036980214	0.0181871876667544	0.0174191572132046	2.85301252833787e-06	0	0	0	1	1	-1	1	1	0	0	0
TanjilG_16742	OIV98415	abscisic acid receptor PYL4-like	LG14	2070056	2070712	57.9058	-2.60448	0.615468	0.967696	-0.868972	-1.27987	2.03076	-0.843618	-2.2402	3.88343	0.275575	-3.73447	0.0145328136697614	0.736700074742868	0.732208832607758	0.73288237882651	0.509584625908844	8.62155225347626e-07	1	2.92926307327002e-07	0.038123675403543	0.482132562191094	0.00729413820551151	-1	0	0	0	0	1	0	-1	1	0	-1
TanjilG_16858	OIW19385	hypothetical protein TanjilG_16858	Scaffold_3_246	17444	18142	34.2386	1.86936	5.10506	1.49531	2.80495	3.16993	-0.222583	2.62956	3.73205	-0.531513	3.36932	5.08258	0.448468156995226	0.000629764969873143	0.68169166643498	0.0981539256725162	0.031338418670656	0.99700882909182	0.172294222792954	1.38484604104258e-06	0.998305167714584	0.0341257981665837	0.000520745673950625	0	1	0	0	1	0	1	1	0	0	1
TanjilG_17157	OIV99347	LOB domain-containing protein 1-like	LG13	2443531	2445000	112.916	2.59051	4.21305	2.31409	4.92823	3.37677	2.84532	2.69483	6.76549	-0.527301	1.43031	6.4328	0.152187159127262	0.00340696410225941	0.458599563069951	0.00160151204808189	0.0343660525643099	0.978160600045479	0.947819706847024	1.08337551931089e-07	0.106754142106364	0.0718951826057106	5.36248011079185e-08	0	1	0	1	1	0	0	1	0	0	1
TanjilG_17264	OIV99454	myosin heavy chain kinase B-like isoform X1	LG13	1676813	1678297	238.765	1.1329	2.2141	1.25287	2.49508	1.74652	0.86182	2.03782	5.05943	0.366279	0.80591	6.23436	0.392566371377034	0.0268163455687098	0.580398294754495	0.012364691849644	0.112342051379263	0.964151453050498	0.970909457010969	9.72519749472512e-18	0.574502292555756	0.0244422371407508	1.20981512689912e-11	0	1	0	1	0	0	1	1	0	0	1
TanjilG_17408	OIV99598	proline-rich protein 4-like isoform X2	LG13	773101	775217	786.489	0.477549	-1.00427	-0.451225	-3.40983	-5.45176	-0.412288	-3.11786	-5.17198	-1.44641	-0.487299	-3.23485	0.936981535583898	0.707032015746236	1	0.0258255985927771	7.45370638821246e-06	0.629493843924109	1	0.00742714315780689	0.945987925704345	0.0180642472487081	6.06381676311644e-06	0	0	0	-1	-1	0	-1	-1	0	0	-1
TanjilG_17414	OIV99604	hypothetical protein TanjilG_17414	LG13	736297	740189	29.622	2.22946	3.67617	1.65753	3.80264	6.28474	0.771327	2.17208	4.26783	0.192392	1.20397	0.121182	0.0630992671578285	0.000259220366233824	0.402122286295455	0.000249081978266468	8.94315282774368e-08	1	0.949784030633677	0.989827320130863	0.657978891605189	0.0282067375750937	1.03419966392603e-06	0	1	0	1	1	0	1	1	0	0	0
TanjilG_17637	OIW13194	AP2/ERF and B3 domain-containing transcription repressor RAV2-like	LG04	18120382	18121415	31.7322	0.0679244	2.33154	0.725248	1.69803	3.44234	2.79232	2.24158	3.0341	1.5012	1.68747	1.72394	0.992783508851695	0.00385845953314408	0.820117374673643	0.10272304639168	3.0887754896509e-06	0.212378652563539	0.238216450599973	0.0126701437155436	0.00108963034876474	0.00295603254797118	1.05807510057795e-05	0	1	0	0	1	1	1	1	0	0	0
TanjilG_18420	OIW19610	omega-hydroxypalmitate O-feruloyl transferase	LG01	577515	583523	128.562	-0.69285	-0.507971	-0.731303	-4.84492	-4.45722	-0.379957	-3.12501	-6.2012	-2.14834	-0.631653	-2.63119	0.787762845762866	0.879230367125986	0.933934062903879	1.03821368918177e-05	2.88445000182007e-05	0.192257770344799	1	0.0143877122787214	0.93334134236592	0.004274318953975	3.25701557457097e-09	0	0	0	-1	-1	0	-1	-1	0	0	-1
TanjilG_18567	OIW20629	Peroxidase 44	Scaffold_32_29	10617	12645	101.875	2.49118	1.19024	1.43902	3.00339	1.64466	0.534234	2.75809	2.58308	-0.286259	0.768364	2.32399	0.045697410213304	0.484412615253254	0.61104889139241	0.0178746219671948	0.289604710789393	1	1	0.0215521978996617	0.839328106733257	0.00815200665855674	0.00902337244747298	1	0	0	1	0	0	1	1	0	0	1
TanjilG_19120	OIW16404	naringenin 8-dimethylallyltransferase 2, chloroplastic-like	LG02	24309929	24314198	412.318	0.539763	1.92722	0.916591	3.70672	3.49304	1.46048	2.70597	4.69075	1.67356	2.22336	8.26548	0.88590122858409	0.200896912886033	0.890444154131844	0.00218500625244838	0.00251148714338919	0.450187959878285	0.424357958501614	3.56004535758265e-08	0.393802767938586	0.0207446624289256	3.34592810579108e-06	0	0	0	1	1	0	1	1	0	0	1
TanjilG_20019	OIW07918	probable carboxylesterase 12	LG07	7525837	7526811	278.893	1.23356	2.56279	0.276803	0.7078	3.80119	2.78073	1.81213	2.77275	0.670737	1.56287	3.20301	0.261168994639664	0.00118182874408735	1	0.783810432108067	8.05801182336901e-08	0.783022578592777	0.318695223170079	2.63894355768287e-06	0.000834260439438653	0.027526293255475	0.000105340082281306	0	1	0	0	1	1	0	1	0	0	1
TanjilG_20153	OIW08052	probable polygalacturonase	LG07	9532387	9535139	408.634	2.03023	3.01381	1.6141	1.93544	2.51555	1.69901	2.21256	3.20595	0.944097	1.77258	4.65047	0.071613566695848	0.00117124656602125	0.413575606632679	0.144194778786219	0.012115568540703	0.688867438105262	0.371275136141614	2.696496929983e-09	0.160360138050016	0.0205477494459298	0.000139899419860287	0	1	0	0	1	0	1	1	0	0	1
TanjilG_20449	OIW11300	heavy metal-associated isoprenylated plant protein 6-like isoform X1	LG05	24841013	24843138	237.211	2.18915	2.47323	0.544481	0.307232	0.452064	2.13718	2.18919	1.67628	0.903963	1.35126	4.2064	0.0171537977687394	0.00328758351273723	0.935542812494084	0.984479030408637	0.871330425202429	0.621819592893185	0.564829803147026	3.3347411875904e-10	0.0189389384818271	0.00637420939401572	0.0362036365068845	1	1	0	0	0	1	1	0	0	0	1
TanjilG_20833	OIV93171	protein ODORANT1-like	LG18	10940952	10941610	45.8737	1.51517	1.35789	0.344392	2.02632	2.26476	1.06341	3.41893	3.12506	-0.469332	1.23968	2.20555	0.114620831122654	0.158717529377115	0.996887109848596	0.0232986483727464	0.00650138658935425	0.897411354775775	0.626071957799688	0.00197338292274453	0.356258060390069	3.49383473534003e-06	5.0630538769345e-06	0	0	0	1	1	0	1	1	0	0	1
TanjilG_20853	OIW14407	probable glycosyltransferase At5g25310 isoform X1	LG03	29463304	29465908	134.76	2.66145	3.54581	2.98819	3.47803	3.17438	2.08396	2.54586	5.18762	0.866528	2.1926	6.10384	0.0855018953055121	0.00936163373067784	0.140452804303585	0.0325486395904225	0.0243391054511289	0.864958514225027	0.529788334067922	9.03014651381039e-09	0.250966556459717	0.0699857824045169	3.65496887142805e-06	0	1	0	1	1	0	0	1	0	0	1
TanjilG_21090	OIV93379	glutamate dehydrogenase 2-like	LG18	7182538	7186343	123.102	0.0895879	2.15411	2.49465	0.996455	2.15075	1.86458	1.1347	2.5844	0.822803	0.691291	3.24516	0.992783508851695	0.021371518050887	0.0245736774916663	0.685734850065803	0.0323668586113902	0.718365957009271	0.987597467121798	1.56635564519778e-05	0.0733778024232009	0.268585699678182	0.00117297313995466	0	1	1	0	1	0	0	1	0	0	1
TanjilG_21885	OIV89442	PREDICTED: uncharacterized protein LOC109341221	KV862296	288407	291154	247.814	0.945503	1.9964	1.01753	2.21002	2.78599	1.43987	2.10903	2.31866	-0.781704	1.38624	3.78176	0.413139301299387	0.0127193453707818	0.6234598627134	0.00842352118650846	7.9611330973467e-05	0.675474123082677	0.41538935637234	1.92263285287992e-09	0.137603030391776	0.00466021757708788	0.000802203778604032	0	0	0	1	1	0	1	1	0	0	1
TanjilG_22093	OIV94896	myb-related protein B-like isoform X1	LG17	873496	879032	6525.74	0.91775	3.17426	2.09989	0.95568	1.7232	0.939278	1.89376	5.46627	2.28309	2.74305	6.57302	0.491896627020342	4.49311378821934e-05	0.0679646060490672	0.632848015225199	0.0845323049097867	0.0266127081851324	0.00268747056661943	7.12117310934525e-23	0.470755213483441	0.024808643886921	1.13904700735335e-15	0	1	0	0	0	0	0	1	1	1	1
TanjilG_22118	OIV94921	hypothetical protein TanjilG_22118	LG17	687629	690676	19.8856	-8.94836	30.4198	-3.72157	0	21.9742	22.0284	1.82488	26.8194	0	0	25.0958	0.597509546807459	0.000980825181694737	1	1	0.0411577871640948	1	1	0.00339581877537117	0.0479105863731738	0.971591634304413	0.00203414267419604	0	1	0	0	1	1	0	1	0	0	1
TanjilG_22164	OIV94967	chalcone synthase 1-like	LG17	361787	363443	3302	1.47678	2.14067	1.68715	1.20571	2.45569	2.92776	1.23771	3.52593	1.9074	1.3099	3.33552	0.0746867847976649	0.00188868407482744	0.0887578106154195	0.27509594538248	0.000176223617759911	0.0264228446349793	0.359143645584397	7.13935517035571e-09	1.75942309370251e-05	0.097475353997408	1.54307851292289e-09	0	1	0	0	1	1	0	1	0	0	1
TanjilG_22224	OIV89409	hypothetical protein TanjilG_22224	KV862302	292203	292481	60.9299	3.19297	4.77321	5.8909	7.089	6.87157	4.19995	3.02165	8.03205	8.57634	6.22125	6.33499	0.307462773826217	0.0724821761710713	0.130060070237763	0.0248795657177707	0.00264296427168602	0.00612161433925388	0.12183777479941	0.00184314943660642	0.146802453070687	0.274564678226303	0.00029394454081308	0	0	0	1	1	0	0	1	1	0	1
TanjilG_22258	OIW13467	PREDICTED: uncharacterized protein LOC109344838	LG04	11145521	11145931	53.5421	0.94953	3.93314	-0.0373293	1.14928	2.537	4.21832	5.643	3.45833	1.71213	1.04382	6.52529	0.838031421240513	0.0472381131469146	1	0.885282046166255	0.409660698359932	0.735652284484029	1	2.72560388110151e-05	0.048773716218649	0.00103709267151824	0.0490993014371064	0	1	0	0	0	1	1	1	0	0	1
TanjilG_22373	OIW17261	Putative non-specific lipid-transfer protein AKCS9	LG02	432706	432993	1509.43	0.748472	-0.565614	-1.04269	-3.23815	-5.71668	-2.36593	-2.7153	-4.69566	-1.62083	-0.654767	-2.38616	0.785312113124621	0.867232938015341	0.847413725984435	0.0132273301366936	2.90441397786851e-08	0.466513427132804	1	0.0333245649290727	0.0998665725210165	0.0214892286681933	3.43654865434727e-06	0	0	0	-1	-1	0	-1	-1	0	0	-1
TanjilG_22520	OIW17408	PREDICTED: uncharacterized protein LOC109328641	LG02	1672436	1672813	86.9783	2.15088	0.749128	0.989687	4.52811	3.0353	2.10747	2.16394	2.50461	1.5028	2.30116	2.32903	0.0886855857575486	0.729616375315667	0.813579324641628	8.52499784033154e-06	0.00585920383524206	0.435385638689124	0.141942562502204	0.0170309438578466	0.100822636329368	0.0410750038414602	0.0103677841732593	0	0	0	1	1	0	1	1	0	0	1
TanjilG_22640	OIW17528	disease resistance protein RPM1-like	LG02	2763021	2765696	72.7564	1.23914	0.745193	0.920498	4.41437	7.30065	1.14841	1.26557	3.39699	3.08967	4.07646	6.38658	0.740452951726226	0.815970726608449	0.9206662598589	0.0124365952977246	1.77163124370691e-05	0.136506192966504	0.0145098537291654	1.26905751004012e-08	0.603428690095573	0.440685671346608	0.0037157508671401	0	0	0	1	1	0	0	1	0	1	1
TanjilG_23165	OIW20785	B3 domain-containing transcription factor NGA1-like isoform X1	Scaffold_45_35	13476	14943	175.405	1.38479	2.63744	2.05946	2.35067	3.52424	4.11584	2.72185	4.43322	2.68045	3.80062	5.36126	0.559272435004344	0.115646989071788	0.541484643056257	0.297991776212401	0.0204860264629235	0.210847130949453	0.0394410272126687	9.19547804174381e-06	0.00603576470249289	0.0618511056089993	0.000403206648441925	0	0	0	0	1	1	0	1	0	1	1
TanjilG_24216	OIV96563	PREDICTED: uncharacterized protein LOC109327373 isoform X4	LG15	18817854	18821945	1125.9	3.13317	3.27611	1.13344	0.935643	1.57866	-0.0298746	2.72166	5.28073	0.228859	1.15634	3.76764	5.63197642299318e-06	2.44174264097009e-07	0.468722022273624	0.522757584771739	0.0504304619799515	0.992062266053246	0.559744102633415	5.87276634772103e-11	1	5.04208173251795e-05	4.09115101306202e-20	1	1	0	0	0	0	1	1	0	0	1
TanjilG_24318	OIW07456	leucoanthocyanidin dioxygenase-like	LG07	19146383	19150408	291.562	-1.22281	6.0196	-8.43157	2.07076	-3.29183	3.34057	-0.733011	6.89645	5.76485	-0.57277	4.31937	0.814329168371246	0.00439767638097822	0.000219044543510518	0.723459332493968	0.304760318212875	0.0235795396017572	1	0.0374596852546329	0.228890074011651	0.891145008049718	0.000211582404105922	0	1	-1	0	0	0	0	1	1	0	1
TanjilG_24929	OIW20851	3-oxo-Delta(4,5)-steroid 5-beta-reductase-like	Scaffold_50_43	1459	5134	223.728	9.80774	7.2851	9.21682	4.80835	9.73929	4.61412	8.33848	10.8222	5.91884	0	12.2939	0.025072770818841	0.137253010115044	0.115554460161216	0.600313084646326	0.024331253337529	0.406557531236178	1	0.00032353748453622	0.436876985855666	0.0419429621702693	0.00252898088383551	1	0	0	0	1	0	1	1	0	0	1
TanjilG_24944	OIW20866	PREDICTED: uncharacterized protein LOC109338968	Scaffold_50_72	35116	36021	54.3288	1.90747	2.2703	1.09412	3.61851	4.16226	-0.472353	3.07134	2.3879	5.86101	3.21038	4.44507	0.296449366273491	0.146208759663344	0.850397248212368	0.0106793633271663	0.000733226441481809	0.0143589420835157	0.0729786391705275	7.91048748466268e-05	0.912250118722062	0.0133928121146679	0.0556284631767503	0	0	0	1	1	0	1	0	1	0	1
TanjilG_25375	OIW18932	lysM domain-containing GPI-anchored protein 2-like	LG01	18973123	18976954	770.506	1.27517	2.19666	2.10542	1.7009	1.00661	2.07671	0.669026	3.14914	0.171708	1.30116	3.08431	0.101243261877577	0.000375696592643082	0.00358898763712766	0.0221363187847662	0.272218810479317	1	0.243250776272851	4.60619679510997e-09	0.00190667665500249	0.412280168244424	3.84393126199866e-09	0	1	1	0	0	1	0	1	0	0	1
TanjilG_25643	OIV94581	branched-chain-amino-acid aminotransferase 6-like	LG17	5784648	5787742	112.089	-0.642159	0.582045	2.1465	-0.17454	5.75091	4.13434	6.05136	11.2682	6.21553	3.70412	9.51014	0.923526887373305	0.931777011339791	0.636387428880027	1	0.000328660967955236	0.0153759925829481	0.215173210940064	1.19689136731898e-09	0.125631374782889	0.00339423922602018	3.38345856559343e-09	0	0	0	0	1	0	1	1	1	0	1
TanjilG_25992	OIV98127	B3 domain-containing protein At2g36080-like isoform X2	LG14	9002053	9002280	17.38	4.85158	3.55994	4.052	4.48696	1.34469	2.85072	2.7931	8.06298	3.29867	2.58346	6.98038	0.0029462261898799	0.0257283600301086	0.068224897127127	0.108789873327385	0.672115168792099	0.36783677279461	0.367472999640722	1.34644956965517e-05	0.180444777710916	0.0452046159219058	4.8465556868057e-06	1	1	0	0	0	0	1	1	0	0	1
TanjilG_26141	OIV99803	probable xyloglucan endotransglucosylase/hydrolase protein 23	LG12	17134991	17136082	441.513	0.967941	2.22722	-1.27562	1.92543	2.48452	-0.442322	0.898115	2.52328	-3.06423	0.9903	2.50847	0.558606497006774	0.0384953095377764	0.628992416252764	0.151643690042214	0.0157325564986134	0.00541493566809068	0.947819706847024	0.00420059046230791	0.871924622981717	0.487529709581299	0.00527888571730033	0	1	0	0	1	0	0	1	-1	0	1
TanjilG_26571	OIV91718	PREDICTED: glutaredoxin-C9-like	LG19	16491196	16491633	124.784	2.44288	2.48956	0.319583	1.14805	3.62754	1.477	2.20354	5.83715	1.14082	1.06943	6.65215	0.0502927551744315	0.0329671351322317	1	0.680971972357057	0.000764934979678837	0.658039199497691	0.954800098861365	2.75969329279193e-13	0.337036661553298	0.0484509634858759	1.56694716346706e-10	0	1	0	0	1	0	1	1	0	0	1
TanjilG_27144	OIV96040	heavy metal-associated isoprenylated plant protein 47	LG16	2593244	2593993	55.9074	-0.149242	1.55504	1.26169	2.9955	6.0298	5.65959	4.29251	2.26142	2.63738	5.59938	5.77412	0.992783508851695	0.557643119646469	0.888124502966087	0.192767464390215	3.91650785799596e-05	0.387003058024735	0.0349151347125564	6.74665850377814e-05	0.000834260439438653	0.00521229329763123	0.17604882382201	0	0	0	0	1	1	1	0	0	1	1
TanjilG_27795	OIW10849	RING-H2 finger protein ATL22-like	LG06	2561274	2563094	139.998	0.945833	2.94875	0.996672	1.37432	2.75633	2.80001	1.27439	2.51356	0.679443	1.56746	3.96393	0.581880484263018	0.00260295811756921	0.794088311775511	0.476638384368597	0.00592814610053777	0.856123899132599	0.608312635478732	2.02677584420503e-06	0.00833377345059794	0.271503783721248	0.00651212640172479	0	1	0	0	1	1	0	1	0	0	1
TanjilG_27922	OIW10171	PREDICTED: uncharacterized protein LOC109351231	LG06	7301316	7302315	135.715	1.98656	2.52726	3.50375	1.8334	2.10133	3.92878	3.87423	5.16309	0.649315	0.840604	3.59643	0.22757215453361	0.0861776758201035	0.0287071362292802	0.460100858045526	0.230429743096178	0.922764237652319	1	0.00132726250278373	0.00327924669655158	0.00136527759044723	1.78838277122364e-06	0	0	1	0	0	1	1	1	0	0	1
TanjilG_28006	OIW10255	PLASMODESMATA CALLOSE-BINDING PROTEIN 4-like	LG06	8200393	8201850	211.778	1.17547	2.60696	0.485193	0.329183	0.680974	4.00143	3.50742	5.67712	2.61374	1.72166	7.56314	0.533622309803635	0.0393984999170351	1	1	0.847535143830792	0.104954079134376	0.709977891463283	5.11010867752646e-15	0.00128137062490041	0.0025472352172031	6.37567436170744e-09	0	1	0	0	0	1	1	1	0	0	1
TanjilG_28255	OIW09656	protein HYPER-SENSITIVITY-RELATED 4-like	LG06	21566767	21569166	166.685	1.90122	7.60347	4.8193	3.31806	6.54547	1.8296	5.02299	5.75523	1.14225	5.111	9.36675	0.705638190449842	0.000748647081246398	0.215843435555578	0.46276260573149	0.0279788381678533	0.92959875381221	0.233454828319749	9.40910663128304e-07	0.654560622356732	0.024381774953612	0.00521262295492337	0	1	0	0	1	0	1	1	0	0	1
TanjilG_28327	OIW11236	glycine-rich protein 5	LG05	26059956	26060255	9.73587	15.9161	0.225842	-1.32593	37.6414	-2.22672	38.6796	-2.32414	-3.00167	-33.6897	0	34.2458	0.0417367123126217	1	1	1.51544814743981e-10	0.971506832177605	1.28987881576261e-07	1	2.2564955439959e-09	1.10996407571678e-10	0.887020390429766	0.804363625397716	1	0	0	1	0	1	0	0	-1	0	1
TanjilG_28424	OIV96567	PREDICTED: uncharacterized protein LOC109327828	LG15	17907683	17908222	127.233	1.23879	2.83561	1.3718	1.07737	6.13155	4.64448	3.10031	3.9025	0.501501	3.5059	5.88925	0.624549654118334	0.0781778453130583	0.801108011036362	0.824827847351489	1.20559293997064e-06	0.979801663068913	0.0682538642023072	4.58337162658889e-07	0.00263726957191958	0.0276924561903216	0.00206171496338086	0	0	0	0	1	1	1	1	0	0	1
TanjilG_28520	OIW16809	hypothetical protein TanjilG_28520	LG02	14761028	14761207	22.8585	0.798223	5.21993	3.02244	1.94242	2.54794	0.932677	2.37936	3.75735	0.402231	1.7235	3.84301	0.692604469672748	1.24331948652491e-05	0.0686011248578085	0.252643768003491	0.0283252109136222	0.970670547807558	0.55750947854771	6.55062821291397e-05	0.60566804332004	0.0318638844544548	0.000234302238219396	0	1	0	0	1	0	1	1	0	0	1
TanjilG_28598	OIW12190	E3 ubiquitin-protein ligase PUB22-like	LG05	4792672	4793889	21.8107	1.92184	3.92039	0.75055	5.36275	3.81815	2.23524	1.6141	9.26664	0.575953	3.02391	5.27305	0.277366173297696	0.023808651287026	0.959912168189677	0.000868984863303848	0.00483172746765175	0.959262705964493	0.464770287023934	0.000124000676014128	0.223711242657445	0.297980171585992	5.40378944284405e-08	0	1	0	1	1	0	0	1	0	0	1
TanjilG_28637	OIW15438	hypothetical protein TanjilG_28637	LG03	8827150	8831565	214.741	4.45128	4.32501	7.58904	2.86741	6.59888	4.77722	6.15658	11.7391	1.68875	2.92324	11.0481	0.145323578017893	0.161791515025613	0.0205700741801039	0.621038248815664	0.0143882117332713	0.856301523304632	0.881563482870222	2.88602171551491e-06	0.116814118858508	0.0151637017529437	8.23551402960913e-07	0	0	1	0	1	0	1	1	0	0	1
TanjilG_28792	OIW05327	transcription factor JUNGBRUNNEN 1-like isoform X1	LG09	2546268	2549215	16.0431	2.26365	1.61262	4.50167	4.09285	6.75045	4.3678	4.28754	4.57466	0.101783	2.95775	5.19546	0.402377320759167	0.685586449542168	0.263841401800496	0.240145007741863	0.0056466917031134	1	0.604813575060164	0.0134808175403775	0.0473702041549878	0.0385974659615291	0.0197650971848155	0	0	0	0	1	1	1	1	0	0	1
TanjilG_28888	OIW19909	zinc transporter 8-like	Scaffold_7_39	7108	9885	112.029	2.43212	1.75356	0.858153	1.49274	3.06563	2.46291	1.50096	2.69306	0.991839	1.91898	4.53663	0.00872374281837189	0.0640490987368567	0.784699242371968	0.25687801988594	8.75633515902963e-05	0.601555047123822	0.11041602714411	1.99023613082922e-10	0.00567813127504756	0.0862934702572221	0.000293224464101893	1	0	0	0	1	1	0	1	0	0	1
TanjilG_28947	OIV97196	hypothetical protein TanjilG_28947	LG15	7019858	7020076	424.784	-4.54744	-3.19448	-0.821779	-0.466752	-0.297341	4.02909	-1.14503	-4.06749	0.396881	0.776971	-3.62259	2.37899647846194e-05	0.00253586983650213	0.890444154131844	0.962485306331056	0.990360351949288	0.973646232153623	0.998255269444721	5.75376800177656e-05	0.000279907419024269	0.389156734439024	1.09898939545154e-05	-1	-1	0	0	0	1	0	-1	0	0	-1
TanjilG_29083	OIW17733	transcription factor MYB98-like	LG01	34850088	34851973	30.5306	0.673712	1.91338	2.20932	1.53725	4.1367	3.16253	2.62941	4.6521	3.43433	3.12722	3.34825	0.838268485990999	0.262813893063711	0.401145550739469	0.649925249517835	0.00216718180834723	0.032325634002047	0.195592515993289	0.00362556136981656	0.0286989419729462	0.0622516713081039	0.000199484744057564	0	0	0	0	1	1	0	1	1	0	1
TanjilG_29084	OIW17734	triose phosphate/phosphate translocator, non-green plastid, chloroplastic-like	LG01	34844512	34848430	295.454	1.17115	4.86527	3.3854	2.46389	6.96987	4.99527	2.99884	6.09314	2.80842	3.63154	6.21449	0.683096914661717	0.000695414698098627	0.124552325861913	0.32290701005023	1.76470510715513e-06	0.202996695703939	0.079326767793797	5.03065692500934e-07	0.00103698426539374	0.0516266270260742	1.78506689089205e-06	0	1	0	0	1	1	0	1	0	0	1
TanjilG_30283	OIW04007	probable WRKY transcription factor 50	LG10	318165	319509	321.927	-0.709597	3.15869	2.53538	3.77151	5.22276	3.91968	4.32521	2.51233	-2.09601	1.53083	5.37253	0.882400330921015	0.0663839860039988	0.421378820304458	0.0345973253071277	0.000259285830248024	0.606244483005125	0.962951236325401	0.00360797511283853	0.0182177174229727	0.00285560510940366	0.104113717575405	0	0	0	1	1	1	1	0	0	0	1
TanjilG_30381	OIV91159	PREDICTED: uncharacterized protein LOC109335396	LG20	2532068	2535116	101.847	-0.136635	1.21352	0.806505	2.21073	2.56645	1.10197	1.90215	2.13884	1.85521	2.14973	2.8429	0.992783508851695	0.216462534732029	0.763178673026373	0.00901526871440241	0.000390476424042674	0.0807556373010654	0.0199251661724037	1.30465584031812e-05	0.280419680046251	0.0104054523223315	0.00189949973813537	0	0	0	1	1	0	0	1	0	1	1
TanjilG_30461	OIV91239	ABC transporter G family member 1-like	LG20	1927970	1930165	19.7172	2.0395	8.50519	0.340827	6.75204	2.15716	6.74642	0.0574389	7.19335	-1.51873	-3.04411	7.51777	0.769404953646497	0.00150210808900682	1	0.0287210137579279	0.647817897165267	0.907412709566478	0.904635903182836	0.00216158998067962	0.0301150936038972	1	0.00272851144717356	0	1	0	1	0	1	0	1	0	0	1
TanjilG_30574	OIW14855	PREDICTED: uncharacterized protein LOC109342628	LG03	24487153	24487966	1110.95	3.09206	2.36434	7.74557	3.17763	6.20089	4.58325	5.55188	10.7651	0.248964	2.41242	12.432	0.280583060497612	0.475173357410435	0.000699959726855537	0.39926045347117	0.0034372336921983	1	0.90609211990525	1.69882022235572e-09	0.0659516950896364	0.00796972171361699	2.5180973473307e-09	0	0	1	0	1	0	1	1	0	0	1
TanjilG_30577	OIW14858	PREDICTED: uncharacterized protein LOC109342628	LG03	24473046	24473859	1157.36	3.08136	2.35065	7.70712	3.18552	6.07474	4.58908	5.54605	10.5839	0.255843	2.42395	12.4214	0.282985161881828	0.479949863242512	0.000758892712744436	0.397683434215921	0.00446684295176554	1	0.903768475356417	1.77165021703163e-09	0.0657768972962756	0.00809048494349953	3.70130355964443e-09	0	0	1	0	1	0	1	1	0	0	1
TanjilG_30988	OIW03568	putative GEM-like protein 8 isoform X2	LG10	3863286	3864468	832.863	1.55843	2.00252	1.10749	2.03061	2.21694	0.670066	2.69818	2.90478	0.116647	1.5189	1.99987	0.0214601884906826	0.000675968371758796	0.338613790973804	0.000920525939500725	7.11470080577412e-05	1	0.0564871908648796	0.000134745571148757	0.479710342555886	1.30523471502473e-06	1.06340931150838e-08	0	1	0	1	1	0	1	1	0	0	0
TanjilG_31105	OIW21237	YLS9 protein	Scaffold_81_158	9101	9784	94.3141	3.45708	7.83672	4.08192	2.76163	8.09853	2.4269	6.40717	6.33365	3.32403	3.23121	8.55181	0.139820393155069	0.000935886988870461	0.20159164523513	0.473364713803072	0.000448301711808362	0.258099115762993	0.567138529463374	9.23472609368606e-08	0.370342593243006	0.00119254330644585	0.00023724459555481	0	1	0	0	1	0	1	1	0	0	1
TanjilG_31106	OIW21238	NDR1/HIN1-like protein 10	Scaffold_81_158	15773	16435	575.68	1.60638	3.11219	-0.285531	0.213491	3.83725	1.48116	2.57259	3.66621	0.19127	2.16182	3.8758	0.172728133393627	0.000475354458353821	1	1	3.67161441437235e-06	1	0.0997771734598897	4.82559677513706e-07	0.225903793295522	0.004274318953975	4.07375856756181e-06	0	1	0	0	1	0	1	1	0	0	1
TanjilG_31159	OIV89042	hydroquinone glucosyltransferase-like	KV862563	4331	5317	542.527	0.438641	2.64102	1.25409	1.46397	2.78707	1.74037	1.04256	2.76431	1.11917	2.2186	3.70933	0.825687759474748	0.00038734371061975	0.463206688871232	0.19615860924025	0.000110263913531375	0.429006976782498	0.0178722636446209	6.57797386705372e-09	0.0555619702513469	0.250021977581641	4.71016008048689e-05	0	1	0	0	1	0	0	1	0	1	1
TanjilG_31995	OIW07803	UDP-glucose flavonoid 3-O-glucosyltransferase 7-like	LG07	10860054	10862574	75.1024	-0.403857	-2.84379	1.61147	-0.205471	0.330419	-4.22488	-2.06443	-2.39406	-0.779788	-0.217751	-3.20499	0.89761513701798	0.00116845542489927	0.350722257283137	1	0.960376971104113	0.925008570137638	1	0.00589183871329169	0.000648382555884655	0.0493938811483721	0.0225146076886829	0	-1	0	0	0	-1	-1	-1	0	0	-1
TanjilG_32355	OIV99096	MLP-like protein 31	LG13	5995946	5997056	2299.94	-0.449169	-0.464712	-1.53945	-2.90589	-5.31856	-2.04726	-3.51618	-4.62869	-1.64675	-0.204028	-2.23829	0.925066586065362	0.909768478477178	0.620823787637505	0.0329083440425077	1.94038444709629e-07	0.443246919329485	1	0.0450251394986886	0.16844365964435	0.00165676171875722	3.67239000493703e-06	0	0	0	-1	-1	0	-1	-1	0	0	-1
TanjilG_32463	OIW12347	UDP-glycosyltransferase 83A1-like	LG05	1687074	1688710	219.362	2.52858	7.2625	3.68334	2.31451	1.28488	2.33651	4.10885	6.09985	3.04788	4.34928	6.72187	0.204973591506615	3.15174864628008e-07	0.0960017368924572	0.400548210394885	0.716477867335922	0.227922263406125	0.0378448305838951	1.41566049596704e-05	0.26349878077335	0.0075106245495573	7.04779341434125e-06	0	1	0	0	0	0	1	1	0	1	1
TanjilG_32594	OIW04402	cationic peroxidase 1-like	LG09	19642395	19644946	630.913	3.65468	6.72074	7.30154	1.8792	4.46682	10.123	3.79891	15.1795	4.29407	3.85851	12.0115	0.182206674079327	0.0014681614997718	0.00259698185876506	0.783048801854937	0.0801734990292137	0.249394774766216	0.496102269514396	5.3396044479094e-08	0.000174318687698766	0.104773240252009	4.43955705968899e-12	0	1	1	0	0	1	0	1	0	0	1
TanjilG_32689	OIW07833	WAT1-related protein At1g43650-like isoform X1	LG07	10341829	10346335	112.41	-3.36143	3.78491	-1.51902	3.34967	-1.41464	2.2994	-2.92501	-3.14082	2.06202	0.216893	-2.94427	0.131690545048733	0.00683984556008352	0.743695048112227	0.0434959525151139	0.655807141404207	0.41409719091604	1	0.0283228888672376	0.234729277444139	0.0422312856259758	0.0165872870634673	0	1	0	1	0	0	-1	-1	0	0	-1
TanjilG_32770	OIW10030	aldehyde dehydrogenase family 2 member C4-like	LG06	10652923	10657374	20.5201	3.69574	7.21361	1.40468	1.71273	7.20044	-0.417282	5.2273	6.46687	2.27157	-0.438986	7.52338	0.141113997075869	0.00298801811677677	0.925945935092427	0.791909297273746	0.00296890811360196	0.617918729085949	1	0.000164487839290084	0.983426689939356	0.0107444900776313	0.000555177320780041	0	1	0	0	1	0	1	1	0	0	1
TanjilG_32954	OIW14612	auxin-responsive protein SAUR71-like	LG03	26352596	26353054	165.136	0.514174	2.97905	0.480952	0.680273	1.13918	2.22545	3.03828	2.56862	0.151595	-0.0629626	2.87877	0.81365730850476	0.000323544561698794	0.970850772130404	0.823323254012889	0.43037145371994	1	1	0.000113651128791038	0.0219019442714881	0.000207471002422374	0.000940761962369179	0	1	0	0	0	1	1	1	0	0	1
TanjilG_00290	OIV92272	calcium-dependent protein kinase 26-like	LG19	4146031	4149758	57.1175	1.16176	2.16326	1.56289	2.07536	4.41885	3.3661	2.22735	3.47971	3.21841	2.01697	5.30411	0.669254656211639	0.270275290964546	0.760629138236336	0.472385133917501	0.00136628451313084	0.120073938771758	0.749031219827659	1.7424305102679e-05	0.0461516174097995	0.163884340391038	0.0101171767994947	0	0	0	0	1	1	0	1	0	0	1
TanjilG_00348	OIV90002	peroxidase 51-like	KV862198	27281	30535	553.504	0.854926	3.41845	1.68475	0.639332	2.12432	0.994668	1.26464	4.32779	2.04969	3.15031	5.59151	0.689492363195549	0.00131717880740773	0.502950022014149	0.91641985376336	0.118787932573453	0.209152154460815	0.0159955490528174	3.32100930091049e-10	0.595786324197353	0.343812297664768	3.97326765395058e-06	0	1	0	0	0	0	0	1	0	1	1
TanjilG_00489	OIV96907	peroxidase 5-like protein	LG15	13254695	13256488	74.3087	2.05549	-0.443047	2.56018	8.17798	2.72729	0.630352	2.56258	3.75193	4.06514	2.15721	3.94945	0.44757386851379	0.965856772794751	0.464704978310796	5.2427648252046e-05	0.22295379570289	0.0486872886220145	0.769563938753645	0.00640753408374285	0.909068319877683	0.137855114807864	0.0133103598372038	0	0	0	1	0	0	0	1	1	0	1
TanjilG_00600	OIV91932	PREDICTED: uncharacterized protein LOC109333700	LG19	12691314	12691673	119.622	1.70116	0.230551	1.55525	1.13993	2.28248	-0.0972794	2.50405	3.06119	-0.303119	0.712481	3.7555	0.151089812603079	0.979449411124142	0.421751449755666	0.572592825330559	0.0220162889137753	0.992841649243248	0.996260757542799	1.29453109741752e-06	1	0.00557318114145722	0.000187840782538275	0	0	0	0	1	0	1	1	0	0	1
TanjilG_00764	OIW04204	aspartyl protease family protein 2-like	LG09	21265372	21267042	558.915	1.62107	2.18058	-0.315479	1.95072	3.01973	1.3272	1.21052	2.43551	-0.00765721	1.63582	2.84836	0.0566085716394055	0.00256814144907248	1	0.0179525741194485	3.98369015291996e-06	1	0.132113091178644	3.32150305476777e-06	0.149062128528554	0.126297546511994	0.000160884583241772	0	1	0	0	1	0	0	1	0	0	1
TanjilG_00920	OIV92786	ethylene-responsive transcription factor 1A-like	LG18	14447623	14448462	1809.16	0.621486	2.49974	-1.49158	0.247313	2.03241	2.1333	0.690913	2.17247	1.146	0.953975	0.50196	0.720157142663526	0.00259749286716928	0.362549351145564	1	0.0258051934948648	0.471958487927755	0.912612431675755	0.663105384086564	0.022633969383673	0.555987791421749	0.00534425527978184	0	1	0	0	1	1	0	1	0	0	0
TanjilG_01095	OIW15572	ZCF37, putative	LG03	4948542	4949462	261.318	2.10157	2.23304	1.19117	1.93085	1.21698	-0.343059	1.89086	2.49755	1.14948	1.58802	3.85447	0.0196072368252069	0.00706023308415719	0.538078359348147	0.0474265824569715	0.299267556782417	0.454149069757396	0.289155374464633	7.41568195448946e-09	0.889810865910397	0.0186786365474833	0.000536759822391385	1	1	0	0	0	0	0	1	0	0	1
TanjilG_01190	OIW21360	hypothetical protein TanjilG_01190	Scaffold_103_72	11616	15232	48.4615	0.908694	2.29727	1.99235	8.82033	3.24778	1.09449	1.41627	4.94594	0.44884	0.903491	6.64443	0.769404953646497	0.134633823819801	0.456891467950104	1.44068467206571e-06	0.02024405984968	1	0.998569103390663	1.15261367787707e-08	0.647738709644313	0.341361423557146	5.56878602493878e-06	0	0	0	1	1	0	0	1	0	0	1
TanjilG_01302	OIW09331	putative cyclic nucleotide-gated ion channel 8 isoform X2	LG06	29562934	29567295	91.9979	1.14384	2.05412	0.796805	0.51878	1.36577	0.0857439	2.01819	2.02367	0.311345	0.900939	2.91148	0.244817058159966	0.00466363381507666	0.743695048112227	0.856557737641404	0.132172425503107	0.961130578679635	0.85655373930608	1.39030191242433e-06	1	0.00419096560230663	0.00176322377082901	0	1	0	0	0	0	1	1	0	0	1
TanjilG_01412	OIV90216	UDP-glycosyltransferase 83A1-like	LG20	19615534	19617282	594.674	1.0165	4.1964	2.27776	2.32308	1.24134	0.424653	1.57983	3.55574	0.149181	2.31701	4.57332	0.473633846131609	3.06699374536271e-07	0.0709547514668736	0.0275215659698627	0.388165322273103	1	0.050847699546901	1.07655354674521e-09	0.861802349771721	0.104298636281014	5.16899573590226e-06	0	1	0	1	0	0	0	1	0	0	1
TanjilG_01435	OIV90239	hypothetical protein TanjilG_01435	LG20	19316165	19316380	42.6801	0.817393	0.419208	-3.8085	-5.11169	-5.6565	0.0808867	-4.03789	-5.50373	-1.32772	-0.219023	-1.12216	0.886710209868413	0.981898928412831	0.201028149909271	0.00870141671132586	0.00348246464292668	0.927347472307756	1	0.759150156555034	1	0.0228428297660259	0.000655284586550215	0	0	0	-1	-1	0	-1	-1	0	0	0
TanjilG_01493	OIV95699	PREDICTED: uncharacterized protein LOC109329114	LG16	7028116	7029231	105.405	-0.45687	1.5517	0.914681	2.17588	2.75167	2.54855	1.23579	1.16306	0.170209	0.275848	2.16913	0.79728340249381	0.0527840375154149	0.649286834835443	0.00541850954894161	2.03700266366645e-05	1	1	0.000458513918176447	0.00061517259499171	0.0990157034131343	0.11024849370309	0	0	0	1	1	1	0	0	0	0	1
TanjilG_01874	OIW16635	probable calcium-binding protein CML44	LG02	19245056	19245493	53.0797	0.134213	1.93888	2.41941	2.41882	3.51593	1.93588	3.27307	2.22837	1.59142	2.09427	2.81913	0.992783508851695	0.0734759393787211	0.102366824293496	0.0521502830328869	4.90864679473487e-05	0.53101467076713	0.248309214079722	0.0013717956847853	0.0906063233019622	0.000327645512201852	0.0117367553440356	0	0	0	0	1	0	1	1	0	0	1
TanjilG_01891	OIW20118	protein TIFY 10a-like	Scaffold_11_9	73430	75958	2110.58	1.15024	4.82583	-0.164524	2.4281	0.71191	1.65806	0.426799	2.5908	0.693544	0.977529	2.79904	0.400858774707195	1.95876142017773e-09	1	0.0216903201424426	0.753261119170999	0.820032718205123	0.93480922642848	0.000566650412574806	0.158099854291794	0.811850067662897	0.00219757168791617	0	1	0	1	0	0	0	1	0	0	1
TanjilG_01893	OIW20120	protein TIFY 10a-like	Scaffold_11_9	83513	86041	1586.41	1.12388	4.75679	-0.14517	2.46089	0.688237	1.58348	0.418942	2.472	0.716745	0.951335	2.86499	0.414132684366673	2.83519738338542e-09	1	0.0180627714489745	0.766853553787958	0.804057720727248	0.940057975556505	0.000364145483342921	0.181070915092402	0.816139464761411	0.00352863806454281	0	1	0	1	0	0	0	1	0	0	1
TanjilG_02002	OIV91384	PREDICTED: uncharacterized protein LOC109335958	LG20	805256	806011	33.8173	1.35283	5.08415	0.445263	0.482076	3.14161	0.907929	3.74594	3.23588	3.94851	2.277	5.17891	0.676690415876403	0.00328758351273723	1	1	0.144371483680621	0.103244688338198	0.67545193751272	7.13024435964843e-05	0.784002074266532	0.0129059780050951	0.0252948880040734	0	1	0	0	0	0	1	1	0	0	1
TanjilG_02003	OIV91385	protein IQ-DOMAIN 1-like isoform X2	LG20	799029	802279	63.4081	1.55709	1.40996	1.38408	2.76792	1.85914	2.3869	1.93523	3.35661	2.36406	0.300329	5.23955	0.247333950821318	0.295790650619133	0.577722329785993	0.0152693235571589	0.120468336800984	0.0987228091586819	1	8.92961576771542e-11	0.0412263682304744	0.0613302936114105	9.9533334144846e-05	0	0	0	1	0	1	0	1	0	0	1
TanjilG_02111	OIW20135	acid phosphatase 1-like isoform X2	Scaffold_11_35	19309	21340	290.279	0.903351	1.68527	0.452138	1.09919	2.44344	2.3482	2.45996	1.78661	-0.67461	0.64092	2.36056	0.358034099526906	0.019684637216692	0.932755929517818	0.342407615465351	0.000148506848454663	0.696353278915187	0.962951236325401	5.53962888121653e-05	0.000760018067403744	0.000135301851869758	0.00464552122304469	0	0	0	0	1	1	1	0	0	0	1
TanjilG_02362	OIW21365	zinc finger protein ZAT11-like	Scaffold_111_3	4875	5366	490.797	1.03936	2.00081	-3.10367	0.559211	2.75817	0.0596857	2.54646	0.260958	-2.93876	2.14724	0.0770677	0.574962330994286	0.127448517790127	0.0165065846319049	0.935732382881222	0.0135930716046938	0.0256215893644092	0.276312166121571	1	1	0.0184802955884993	0.932298671474193	0	0	-1	0	1	0	1	0	-1	0	0
TanjilG_02436	OIW17808	protein ATAF2-like	LG01	34118470	34119527	231.238	-0.0426754	1.89308	2.43165	1.00691	7.31785	4.0964	2.7326	5.2249	2.48041	2.95466	6.06814	0.992783508851695	0.42178904544532	0.503915335042201	0.891989894422395	3.12713361184451e-07	0.352895331979915	0.389602534015275	6.92180789158516e-06	0.0186215722227153	0.104423506054581	0.000188344827962634	0	0	0	0	1	1	0	1	0	0	1
TanjilG_02675	OIW07041	transcription factor MYB108-like	LG08	6054192	6055318	39.9822	0.947281	1.65406	0.127679	2.66432	5.17676	2.95772	1.82056	4.21302	-1.2959	2.31012	2.86868	0.701434395222486	0.358005571554247	1	0.108789873327385	2.03700266366645e-05	0.6632904957553	0.396872419574627	0.0154052663325846	0.0392058645957114	0.215457598812105	0.000204669308853622	0	0	0	0	1	1	0	1	0	0	1
TanjilG_03155	OIW08479	probable L-gulonolactone oxidase 6 isoform X1	LG07	2600824	2604646	163.03	1.36215	5.84008	1.85112	5.2078	3.0205	2.2726	1.98766	6.90556	0.543806	1.14283	6.084	0.554288645846312	1.07628435552165e-05	0.611078014554836	0.000259438378999264	0.0587954584828599	0.967310514173912	0.983525254623233	1.46609507457864e-07	0.21242951818941	0.210507091723894	6.75059925548255e-09	0	1	0	1	0	0	0	1	0	0	1
TanjilG_03235	OIW08559	PREDICTED: uncharacterized protein LOC109351658	LG07	1977556	1981417	30.2608	3.96465	1.31181	2.07751	1.57496	2.27839	3.95533	1.97193	4.29688	0.458269	0.868545	5.65787	0.0134841944329652	0.634360362880688	0.594561359507791	0.689786525418805	0.338644829399709	1	1	1.63920858615184e-05	0.0195643901231966	0.33153768489372	0.00114777134513031	1	0	0	0	0	1	0	1	0	0	1
TanjilG_03280	OIW08604	licodione synthase-like	LG07	1673038	1677564	22.9319	-1.17757	-1.0005	-0.816477	-1.49646	-5.17548	0.722949	-3.04869	-8.50204	-1.58236	-1.50399	-3.42552	0.608451310203175	0.698513078180871	0.950548943312675	0.646543190606961	0.000108083844084648	0.65028907864513	0.924090145900023	0.0247521325792406	0.861564004019916	0.033714291113525	1.00056641057944e-06	0	0	0	0	-1	0	-1	-1	0	0	-1
TanjilG_03524	OIV89735	homeobox-leucine zipper protein HAT22-like	KV862248	65234	65684	86.7041	-0.496897	1.71391	0.780559	0.00672573	3.38896	1.7857	2.09978	4.17098	1.79841	3.05079	6.29382	0.897351234117665	0.24207202691599	0.916214972874685	1	0.00210382228833657	0.564779932660582	0.038250971880358	5.21747954824191e-11	0.243927105301961	0.0704135519115269	1.51949097160125e-05	0	0	0	0	1	0	0	1	0	1	1
TanjilG_03657	OIW05268	hypothetical protein TanjilG_03657	LG09	3538737	3541490	263.793	0.874225	2.3795	0.610611	1.14985	3.20345	0.909085	1.90419	1.51313	0.655883	2.30183	3.58071	0.475422132866486	0.00142696015264611	0.882647377423498	0.397683434215921	2.96435005114296e-06	0.775552585771309	0.00918178325075765	1.62373480928591e-08	0.425717999756938	0.0113146570162429	0.0435799949460545	0	1	0	0	1	0	0	0	0	1	1
TanjilG_03705	OIW06810	cytochrome P450 CYP72A219-like	LG08	8017536	8021782	192.234	0.189211	1.72592	1.18493	2.24689	2.15101	-0.363142	1.55346	3.66857	0.133049	1.18702	4.06842	0.982214023858489	0.0307936697399607	0.457500346521857	0.00345124615504245	0.00255560059174096	1	0.581502290252094	8.42061151456979e-12	0.854705110118875	0.0417312659391524	2.18417764848532e-09	0	0	0	1	1	0	0	1	0	0	1
TanjilG_03977	OIW06583	ethylene-responsive transcription factor ERF110-like isoform X1	LG08	9743480	9744770	597.974	2.68591	5.40175	1.96183	2.72463	1.90569	1.96813	3.61502	6.47828	0.782781	2.2845	6.39979	0.129606083208555	9.39665542459019e-05	0.602473027559707	0.201309345875479	0.425723963982598	0.911569094123252	0.627776766906209	9.4455167041955e-08	0.331989255767237	0.0126567510402838	9.9196933760819e-08	0	1	0	0	0	0	1	1	0	0	1
TanjilG_04103	OIW06709	probable WRKY transcription factor 72	LG08	10700708	10704464	73.493	-0.598188	1.82114	0.173714	3.41104	2.73549	-0.137299	2.50389	2.64987	1.24837	1.70346	-0.324784	0.843060907969408	0.156689973795979	1	0.00204591406867248	0.0168263935648105	0.543247670624742	0.525872404317445	0.866843693704082	1	0.0130914080435556	0.00518149714543253	0	0	0	1	1	0	1	1	0	0	0
TanjilG_04118	OIW12369	hypothetical protein TanjilG_04118	LG05	133945	134391	25.899	0.277434	0.695898	6.14108	0	-16.4334	-22.4032	3.06855	19.1975	0.677697	1.60362	21.7786	0.992783508851695	0.982457508213563	0.282512643469298	1	4.46888296784211e-08	1	1	2.0811013619429e-16	3.64098731937524e-16	0.40518468059301	2.66397807839708e-12	0	0	0	0	-1	-1	0	1	0	0	1
TanjilG_04207	OIW12458	NAC domain-containing protein 92-like	LG05	1241340	1243322	19.8485	0.811162	1.42561	21.7681	0	17.1712	-3.14016	2.96834	18.6961	0.465982	1.45341	21.2007	0.992783508851695	0.917520529618281	2.16562315316701e-09	1	3.0887754896509e-06	1	1	1.00812237226934e-10	0.642940883029607	0.569511668446931	4.38973405669307e-08	0	0	1	0	1	0	0	1	0	0	1
TanjilG_04254	OIW15719	cysteine-rich repeat secretory protein 38-like	LG03	226963	227697	489.46	1.5878	1.5808	1.82971	2.72263	-0.659508	2.26858	2.13779	4.04508	0.156176	1.76896	2.0204	0.250975492336938	0.259105506824102	0.376133119041135	0.0233547670643482	0.827455272148206	1	0.510104425807749	0.0416732118747091	0.0637087328715872	0.0452921735042859	6.63932174385353e-06	0	0	0	1	0	0	1	1	0	0	1
TanjilG_04349	OIW15814	protein MTL1-like	LG03	877461	878048	45.8724	5.46026	6.79144	3.3326	4.41945	7.25014	2.53943	2.16954	6.97163	2.12153	2.75732	7.85129	0.0716605511254402	0.00150210808900682	0.463206688871232	0.284074872439747	0.00446769751284	0.674365066625523	0.947819706847024	1.34545738691636e-05	0.419027289611172	0.379842807578927	0.000393818583686615	0	1	0	0	1	0	0	1	0	0	1
TanjilG_04547	OIW16012	NAC domain-containing protein 100-like	LG03	2373888	2375842	32.1163	1.9109	5.66799	3.45605	5.44131	3.55018	2.65365	1.51342	8.70786	0	-0.120575	9.2551	0.664980874674454	0.0127193453707818	0.22236648295848	0.0056903409701213	0.076651299208433	1	1	1.55317341752629e-06	0.337388765153269	0.502178846734558	2.10207311090301e-06	0	1	0	1	0	0	0	1	0	0	1
TanjilG_04646	OIW12482	late embryogenesis abundant protein D-34-like	LG04	27278914	27279784	638.624	1.73406	2.66326	1.817	1.5466	1.16507	-2.6662	1.24643	2.84173	0.264675	0.758823	3.58646	0.0425211806434139	0.000314863158206693	0.0873295896284568	0.122950341160069	0.27696557582017	0.984799881322844	0.952568682848121	6.55113762431948e-09	0.000471957815285769	0.129064427130679	1.17240048877243e-05	0	1	0	0	0	-1	0	1	0	0	1
TanjilG_05032	OIW02439	PREDICTED: esterase-like	LG11	4054221	4057023	66.3043	-0.414795	1.94653	1.17009	4.40426	2.19882	2.51846	1.11549	4.03401	-0.0276649	1.15086	5.44827	0.923790371185718	0.128055713902807	0.733007369271921	1.8061991407008e-05	0.0747789728145629	1	0.932012565650836	3.87955074681755e-09	0.0417060653360581	0.391961201828261	9.51570462343403e-06	0	0	0	1	0	1	0	1	0	0	1
TanjilG_05277	OIV95729	Transcription factor MYB35	LG16	5575359	5578028	32.8055	0.347513	1.809	1.31276	3.47193	2.66087	1.84772	1.35186	3.89947	0.43105	1.28342	3.62513	0.943026332108531	0.105697844352911	0.580398294754495	0.000392810667243262	0.00654256401785661	0.948075611242491	0.755547045422091	6.23513489312509e-06	0.131068390682493	0.192888635288242	2.25821553093021e-06	0	0	0	1	1	0	0	1	0	0	1
TanjilG_05321	OIW13431	vestitone reductase-like	LG04	11471126	11473458	80.8322	-0.78905	0.59694	-1.61773	-3.38187	-5.30856	-0.559227	-4.092	-3.46247	-0.306264	-0.828312	-0.639294	0.824176142950831	0.893167114195879	0.715986479625224	0.0407236124050101	0.000108047470452406	1	1	0.76867378039973	0.904915148876434	0.00604681260850887	0.00784377126546691	0	0	0	-1	-1	0	-1	-1	0	0	0
TanjilG_05544	OIW10396	isoflavone 4'-O-methyltransferase-like isoform X1	LG06	6723454	6724664	95.0334	2.09299	2.27954	2.05383	2.78046	4.28908	4.34478	-0.504266	4.42492	3.07732	4.5169	2.10066	0.312435002528932	0.260008997950276	0.611475585176705	0.297376046652637	0.0174950981013754	0.154006253660881	0.0199209213371062	0.174478018653569	0.00774821032437293	0.896361808726869	0.00624949235488893	0	0	0	0	1	1	0	1	0	1	0
TanjilG_05589	OIV93886	ethylene-responsive transcription factor ABR1-like isoform X2	LG17	17329354	17331164	208.296	2.50011	6.5854	0.266734	5.55742	2.52635	2.29862	5.11375	11.3523	1.3598	2.0964	10.6586	0.437741396366606	0.00346391677643097	1	0.096213726118348	0.508392116309941	0.873054956872366	0.968240550907097	7.87943326097264e-08	0.494863828534695	0.025851821423298	4.47850553779049e-07	0	1	0	0	0	0	1	1	0	0	1
TanjilG_05641	OIV93938	protein HOTHEAD-like	LG17	18340244	18346035	430.157	-0.552359	-0.785221	-0.743665	-2.14369	-2.94587	-1.04142	-1.49302	-3.21251	0.104749	-0.448238	-2.04465	0.790894270074716	0.629503244399513	0.868197156598853	0.0434959525151139	0.000667079990573295	1	1	0.0130467708356939	0.437207101869523	0.117772094103521	3.507740643058e-05	0	0	0	-1	-1	0	0	-1	0	0	-1
TanjilG_05818	OIW00468	protein MKS1-like isoform X1	LG12	13635859	13636497	160.469	0.982174	1.66893	0.170161	0.759148	3.72819	2.80076	1.94351	2.26584	0.283415	1.99863	2.71587	0.44112139100224	0.086576762977996	1	0.767004291063652	6.20901958174255e-07	0.986421111044627	0.0862536326873618	0.000177651319851693	0.00129602631691811	0.0202186996049498	0.00320684386383506	0	0	0	0	1	1	0	1	0	0	1
TanjilG_06115	OIW03606	protein DETOXIFICATION 16-like isoform X1	LG10	3289743	3293693	740.195	2.07531	2.42281	1.83597	0.400156	1.56245	1.524	1.17024	3.36693	1.1665	1.35293	4.64124	0.0214161604339126	0.00286151811400453	0.135155469037722	0.947860439253336	0.124567246158232	0.434336660533719	0.558822666781424	3.55227851773435e-12	0.136711356964036	0.209026561580907	1.36474294920431e-06	1	1	0	0	0	0	0	1	0	0	1
TanjilG_06491	OIW09685	PAMP-induced secreted peptide 2	LG06	19926478	19926822	101.595	2.28937	2.94645	5.0324	3.98001	10.0396	6.12313	2.44099	5.59895	4.75184	4.71311	8.47793	0.464821931781461	0.281861990219447	0.104557406217365	0.272857668770372	1.21341573059254e-05	0.0860174482497518	0.116748567120853	1.52351485765597e-06	0.00751487796819733	0.316869189345252	0.00239171811334574	0	0	0	0	1	1	0	1	0	0	1
TanjilG_07128	OIV97376	protein ALP1-like	LG15	1751174	1752706	287.906	-0.525206	3.86505	-5.38803	0.153082	2.94643	-0.143422	1.69335	0.163752	-3.77877	1.23204	0.211595	0.911042788001017	0.00232746564159044	1.24932786451572e-05	1	0.0289950778211575	0.014846533191878	0.965522029858721	0.963258370580905	1	0.257334612425153	0.986852886000902	0	1	-1	0	1	0	0	0	-1	0	0
TanjilG_07196	OIW05920	calcium-binding protein PBP1-like	LG08	22244762	22245124	106.803	0.490759	2.10916	1.13505	0.608253	4.50265	3.89394	3.60368	1.19657	0.651267	2.42809	3.16386	0.880696113990154	0.0722318257084819	0.745603668147377	0.909701697972629	5.57954077248954e-07	0.881237663669511	0.098350082786339	0.000349605136799593	0.000192857025653361	0.000222788505011664	0.303884587123496	0	0	0	0	1	1	1	0	0	0	1
TanjilG_07320	OIW20229	BAHD acyltransferase DCR isoform X1	Scaffold_16_26	79412	84018	616.358	-0.0605402	-0.319086	-1.70685	-3.2559	-5.60957	-1.157	-2.1777	-4.56909	-0.877945	-0.147887	-2.19226	0.992783508851695	0.9665186452391	0.540723037058359	0.0104239354801949	6.68761232427367e-08	0.813682563734782	1	0.0487532163387625	0.541742496275099	0.071978441070824	4.66227562796811e-06	0	0	0	-1	-1	0	0	-1	0	0	-1
TanjilG_07480	OIV95324	rhicadhesin receptor-like	LG16	16708018	16708641	940.529	0.00495529	1.77947	1.66731	1.1124	2.41532	0.107113	2.45839	2.79097	0.805206	1.52232	3.04176	0.997870839794705	0.0071385643729688	0.0554223195226325	0.283353865608444	8.16419042456698e-05	0.540477751632266	0.0879394937200481	9.03014651381039e-09	1	4.27610230575069e-05	3.03611168495262e-07	0	0	0	0	1	0	1	1	0	0	1
TanjilG_08008	OIW13666	vacuolar protein sorting-associated protein 28 homolog 2	LG04	9460452	9460733	62.5471	-0.819171	2.04996	3.322	1.82939	1.05768	0.900144	1.54927	3.1233	-1.0345	1.04223	3.67511	0.667184466581033	0.0384025348571999	0.000902348378193864	0.125858671618349	0.511149173977244	0.616783919468534	0.881711336463571	6.14561882796579e-07	0.534234542581592	0.0944657164424226	3.65151276916881e-05	0	1	1	0	0	0	0	1	0	0	1
TanjilG_08733	OIV92060	MDIS1-interacting receptor like kinase 2-like	LG19	7544245	7547524	327.765	0.64615	0.813602	0.1879	1.36003	3.19675	1.14686	1.84483	2.01382	0.1384	2.14689	2.63048	0.588235493382096	0.435174562444958	1	0.158509805618174	1.63111487541932e-07	1	0.00505159754434482	6.10223913260493e-06	0.198518189683078	0.00592625929911707	0.00120943025989538	0	0	0	0	1	0	0	1	0	1	1
TanjilG_09030	OIV91618	probable NAD(P)H dehydrogenase (quinone) FQR1-like 1	LG19	17306019	17307420	104.064	-0.225021	1.12119	1.43948	6.66085	3.69389	-1.92266	2.0979	3.83865	0.456152	0.722866	3.58008	0.992783508851695	0.650146761295164	0.750026428231166	0.000293468953555801	0.00983666530842587	0.985414798771008	1	0.00247981477880745	0.287455192986811	0.144852878461585	0.00185228120746393	0	0	0	1	1	0	0	1	0	0	1
TanjilG_09094	OIW19310	protein PLANT CADMIUM RESISTANCE 2-like	LG01	4466701	4468674	729.785	0.480848	2.36813	0.432693	0.794731	1.12938	0.613818	2.09282	2.53239	-0.360429	1.16874	3.27414	0.725740860525661	0.000130916862189541	0.933893806925748	0.586944345239023	0.195773707543432	0.914116591028492	0.478275387843897	1.42531998265878e-09	0.584174862233782	0.000861673316187856	7.39483431462134e-06	0	1	0	0	0	0	1	1	0	0	1
TanjilG_09263	OIV96721	sugar transport protein 5	LG15	17755339	17758958	14.0358	-0.691198	-0.497534	-0.619198	1.64195	1.31255	3.01438	3.19864	4.47296	2.14792	3.69835	0.176851	0.975440170133801	0.98274811850197	1	0.71934831110799	0.633337523539618	0.335451682186888	0.0281965671517454	0.983133308933732	0.0388481766038988	0.0115801546760026	0.00102102034062843	0	0	0	0	0	1	1	1	0	1	0
TanjilG_09442	OIW19422	glycine-rich cell wall structural protein 1-like	LG01	2875493	2875978	760.794	-0.581526	-0.934379	-0.27964	-2.35839	-4.23815	-0.290802	-0.456179	-2.18209	-0.277149	0.131118	-2.01729	0.713319409199503	0.423938975675147	1	0.00409593557181093	4.83069458059589e-10	0.980480378982778	1	0.00420011199690278	0.914182427763434	0.723152962850578	0.00219709850211851	0	0	0	-1	-1	0	0	-1	0	0	-1
TanjilG_09456	OIW19436	probable xyloglucan endotransglucosylase/hydrolase protein 23	LG01	2712033	2713061	259.338	0.377878	1.97338	-2.95857	1.17654	3.28445	-0.228277	1.18879	0.878675	-3.04969	1.92036	2.93878	0.934598253571205	0.106954257276855	0.0165496592098711	0.617814360455745	0.0009179284616008	0.00979806044634064	0.357216549736185	0.00105607512756748	0.983826860087051	0.342046528655514	0.509298448722638	0	0	-1	0	1	0	0	0	-1	0	1
TanjilG_09804	OIV96377	hypothetical protein TanjilG_09804	LG15	20147679	20147990	10.9497	3.71978	4.62363	6.82409	3.11088	6.19231	3.02431	2.74759	6.36575	1.11158	2.58742	6.56879	0.0727551765056988	0.0678006637106504	0.0143224501406025	0.559058443387585	0.0103017317858197	0.887532541393523	0.825831899505985	0.00146941284330478	0.171099683397421	0.219899403365471	0.00294539877530496	0	0	1	0	1	0	0	1	0	0	1
TanjilG_09871	OIV96444	3-ketoacyl-CoA synthase 10	LG15	19738510	19741593	782.088	-0.116751	0.107876	-1.14146	-1.63685	-3.98738	0.102542	-2.56701	-3.12474	-0.433581	-0.237388	-2.59911	0.992783508851695	1	0.803101216631227	0.460760817513628	0.000272028145817657	0.974732609249525	1	0.0166799505027742	1	0.0298979385461027	0.00357784079249894	0	0	0	0	-1	0	-1	-1	0	0	-1
TanjilG_09972	OIV92374	calcium-binding protein PBP1-like	LG19	2147911	2148267	1092.44	1.04729	1.57255	-2.43502	0.150269	2.47997	1.95348	2.67766	-0.119514	-1.50314	2.56802	-0.0213989	0.478494950278634	0.189402054929763	0.049203996314322	1	0.0104006160288056	0.341850652289697	0.0261315566085605	1	0.0846406860294141	0.00317667423152683	0.988500312551488	0	0	-1	0	1	0	1	0	0	1	0
TanjilG_09973	OIV92375	G-type lectin S-receptor-like serine/threonine-protein kinase At4g27290	LG19	2143453	2144804	9.96554	0.623061	-0.785188	-1.5454	-0.572398	-2.83623	-0.770197	-1.53764	-3.71566	-4.40904	-0.575744	-5.51532	0.797388080357426	0.743726794387926	0.547200913754765	0.927374754033713	0.0066729483171194	0.0392969867626348	1	0.000875160778021558	0.786981060634781	0.360739701357306	0.0490422544338078	0	0	0	0	-1	0	0	-1	-1	0	-1
TanjilG_09974	OIV92376	calcium-binding protein PBP1-like	LG19	2141537	2141893	1095.5	1.05879	1.58861	-2.43554	0.150585	2.49262	1.96191	2.68809	-0.117461	-1.50215	2.58008	-0.0192886	0.471453769484177	0.183131107190169	0.049203996314322	1	0.0100105936699548	0.342615953628348	0.0254688446233773	1	0.0831241898834516	0.00307112870042201	0.988500312551488	0	0	-1	0	1	0	1	0	0	1	0
TanjilG_10214	OIW07379	LRR receptor-like serine/threonine-protein kinase GSO2	LG08	244181	247489	88.3886	0.815515	1.81386	2.43498	3.5421	6.45954	-0.0325251	-1.78669	6.37359	1.73578	1.02369	5.60001	0.828523678986439	0.394456461631067	0.431329136610635	0.0448400063650302	8.69731865589357e-07	0.793552102743193	1	2.72783742834443e-05	1	0.444530616303216	6.79047255664676e-06	0	0	0	1	1	0	0	1	0	0	1
TanjilG_10361	OIW01200	MDIS1-interacting receptor like kinase 2-like	LG11	33421337	33424902	272.038	0.54653	0.801817	-0.369265	1.35953	2.27002	2.21825	0.981776	1.63671	1.16108	3.26216	3.09931	0.820985344081438	0.658042967943396	1	0.461522910429034	0.0332141441869436	0.560993704655643	0.00134091611301577	0.000209595746694933	0.0443705960450537	0.421029614337226	0.0945545162606191	0	0	0	0	1	1	0	0	0	1	1
TanjilG_10445	OIW01284	1-aminocyclopropane-1-carboxylate oxidase homolog 1-like	LG11	34648883	34650855	448.087	1.49702	7.48007	-0.603402	5.37241	1.07561	3.05518	2.2619	4.7659	1.84695	0.425732	3.40253	0.636375752643167	1.73741331745159e-06	1	0.00286420438973902	0.831134692175477	0.639548477645181	1	0.0376520626651175	0.161159493972238	0.260821995091261	0.00235496047279522	0	1	0	1	0	0	0	1	0	0	1
TanjilG_10503	OIV92293	transcription factor ORG2-like isoform X1	LG19	2766584	2767579	461.961	-4.41922	-4.17659	-1.66629	-0.198695	0.122293	1.45677	-2.74046	-3.64916	-0.575744	0.463497	-4.21852	0.0015962155120061	0.00202810816269185	0.658781403298148	1	1	0.952886837939109	1	0.000220440947229994	0.481354590582637	0.0500558911818929	0.0029193105523235	-1	-1	0	0	0	0	0	-1	0	0	-1
TanjilG_10605	OIW19044	non-specific lipid-transfer protein 1-like	LG01	16322868	16323676	1763.53	1.04148	-1.26655	1.83385	-2.58699	-4.69691	-3.24595	-1.76172	-3.15828	-0.701742	-0.929079	-3.98028	0.587688983610055	0.462774869339341	0.430953946410259	0.0551249549161168	1.92233868720107e-06	0.87486648685916	0.977404525055036	2.69186564791838e-05	0.00595017393297151	0.148521773535983	0.00174231405977209	0	0	0	0	-1	-1	0	-1	0	0	-1
TanjilG_10669	OIW21770	ethylene-responsive transcription factor 1B-like	Scaffold_200_12	7297	7983	29.4354	-0.30667	4.94137	2.34475	-1.3206	6.4073	1.12671	0.278036	2.9172	2.31708	1.85282	3.77766	0.992783508851695	0.000831986358680658	0.530080681485272	0.856577050527996	0.00254640450388689	0.350757459338334	0.962951236325401	0.00512807640347502	0.679424005249731	0.973406689526879	0.0455807397893359	0	1	0	0	1	0	0	1	0	0	1
TanjilG_11070	OIV93488	high affinity sulfate transporter 1-like	LG18	3264652	3267037	7.46291	5.44233	5.24707	-1.41606	5.18222	0.997518	2.33523	3.87979	2.44146	3.59949	0.809065	-1.07942	0.0171030569595836	0.0142650506380157	0.871571469388136	0.0322666368410016	0.782315038786614	0.131520994876016	1	0.564671709892632	0.180880784914789	0.0149822449960439	0.0864725293380328	1	1	0	1	0	0	1	0	0	0	0
TanjilG_11086	OIW04784	gibberellin 20 oxidase 1-D-like isoform X1	LG09	13277349	13277897	176.243	-2.39315	0.528137	-1.78128	-3.47907	2.86102	-0.622412	-2.57366	-2.48568	-0.40118	0.0744891	-0.67745	0.0998270351713196	0.887444826972489	0.534417415744986	0.00883875496411798	0.0419299781103245	0.987272556114185	1	0.685298828181137	0.832290688522608	0.0360941300575882	0.0338929130043096	0	0	0	-1	1	0	-1	-1	0	0	0
TanjilG_11087	OIW04785	Gibberellin 20 oxidase 2	LG09	13273429	13276171	633.002	-2.6401	0.194964	-1.50554	-2.83954	3.21076	-0.225638	-1.20491	-2.28967	-0.296919	-0.186797	-0.60681	0.0466155653611397	1	0.633166410855936	0.0384781742838703	0.00757285415409696	1	1	0.715589596009861	0.993639890054138	0.410035309468831	0.0443828408972268	-1	0	0	-1	1	0	0	-1	0	0	0
TanjilG_11197	OIW02303	ethylene-responsive transcription factor ERF023-like	LG11	5355023	5355556	36.0702	3.4625	1.45054	2.66047	4.63519	2.83787	4.44432	2.42776	4.60716	-0.318031	1.05749	4.94876	0.253048136957099	0.509801762948768	0.28630017084357	0.0045881400722559	0.0885201511289843	1	0.995884541792622	6.86293124815709e-05	0.0494260481911655	0.100042377134895	0.0007572936234023	0	0	0	1	0	1	0	1	0	0	1
TanjilG_11392	OIW14047	heat shock 70 kDa protein-like	LG04	5323662	5326386	7.8764	2.04155	5.04285	4.32687	4.21189	4.6838	6.41411	6.85357	6.25535	2.03888	3.43535	6.23194	0.763745579286381	0.129012347344509	0.47933602681112	0.384723742424249	0.206668179677378	0.748396647049162	0.822252175414738	0.00502486277322501	0.0380037643385803	0.0100863207603214	0.0152997965931873	0	0	0	0	0	1	1	1	0	0	1
TanjilG_12012	OIW03415	transcription factor RAX3-like	LG10	5752372	5753893	460.514	0.917965	2.0808	1.5467	3.95887	3.25555	-1.18072	2.30234	3.86651	-0.276088	0.848127	0.94174	0.581649914372327	0.0524763820150825	0.455858767733405	1.64399438386447e-05	0.000298824874097251	1	0.96911706308839	0.383481514423959	0.396535933318722	0.0149116779959471	2.1561593114853e-06	0	0	0	1	1	0	1	1	0	0	0
TanjilG_12102	OIW14509	probable calcium-binding protein CML44	LG03	27809987	27810433	63.2174	0.486438	3.71103	1.64913	2.12164	4.9226	1.75016	2.2842	3.40494	0.877425	2.07283	5.91876	0.920494483511503	0.00194954106809341	0.591487065162446	0.244767323868026	3.83029585736423e-05	0.841602447937593	0.522222677205696	2.72573161983206e-09	0.285745933817413	0.0683552100019427	0.00145830904068316	0	1	0	0	1	0	0	1	0	0	1
TanjilG_12240	OIW00836	PREDICTED: uncharacterized protein LOC109361589 isoform X1	LG12	4594521	4596212	35.5782	2.27176	8.06923	2.13664	3.45256	2.71424	2.03908	4.73322	7.33306	-0.496188	2.24378	3.8723	0.378058105101091	0.000387534148491744	0.751351710960871	0.407190272254101	0.415553423969014	1	0.853653316362445	0.0234831931713427	0.452525680425588	0.0173746217417837	0.000218937803527655	0	1	0	0	0	0	1	1	0	0	1
TanjilG_12322	OIV97565	probable serine/threonine-protein kinase PBL11	LG14	16072678	16072965	82.9184	1.02107	1.33922	1.15493	1.68772	4.44372	2.14533	3.00512	2.86193	0.736769	1.82294	3.893	0.539801476508416	0.329725305906286	0.720436306786014	0.277108337015006	2.38042503782234e-07	0.833227833943218	0.368819725027113	3.50797167672278e-06	0.0662676030037209	0.00151740951420919	0.00152378299724727	0	0	0	0	1	0	1	1	0	0	1
TanjilG_12627	OIV97870	purine permease 1-like	LG14	13710036	13710887	74.2481	-0.0110964	-0.341166	-0.460996	-1.071	-2.94135	0.800262	-3.5518	-2.78664	-0.387216	0.576189	-2.40088	0.996234426682064	0.90973473324522	0.974524502656391	0.56899261709454	0.00638862293525024	0.947819563371408	1	0.0024363975563396	0.61243709885797	0.000113220342680266	0.00035357282078833	0	0	0	0	-1	0	-1	-1	0	0	-1
TanjilG_12629	OIV97872	purine permease 1-like	LG14	13686006	13687236	152.822	0.247087	-1.236	-0.816853	-3.64201	-5.90939	-1.08315	-1.86934	-3.90875	-0.828074	-0.418842	-3.42566	0.992783508851695	0.520985467955952	0.91844339100887	0.00313228069382239	0.000581715534044739	0.83555121978487	1	0.000844752784937448	0.580700027444852	0.138072693900752	0.000149985397955317	0	0	0	-1	-1	0	0	-1	0	0	-1
TanjilG_12810	OIW00869	dirigent protein 22-like	LG12	3712300	3712872	1289.92	2.01466	1.91243	1.74031	1.10135	2.14111	2.88405	1.20372	1.9169	0.959942	2.04629	1.66106	0.00399912951160398	0.00406710415337865	0.0486148969738424	0.321334758661134	0.000747921845102322	0.421635853688402	0.00593286133731489	0.00582266977089231	6.00950003554184e-06	0.0859152272891372	0.00145153199538906	1	0	0	0	1	1	0	0	0	1	0
TanjilG_12812	OIW00871	dirigent protein 19-like	LG12	3695329	3695877	450.714	1.58447	2.17543	-0.69094	0.301397	4.2377	3.74093	1.18305	2.58562	0.411136	2.76269	3.21906	0.287646332793564	0.0888645571124666	0.944070073898487	1	2.03700266366645e-05	0.973646232153623	0.0555939323148802	0.000823692358232135	0.000834260439438653	0.391884790729675	0.0124688565618602	0	0	0	0	1	1	0	1	0	0	1
TanjilG_12874	OIW02560	hypothetical protein TanjilG_12874	LG11	3372731	3374651	188.027	0.366452	-0.387371	1.25109	1.72434	2.37681	1.77022	2.58945	3.61925	0.478251	0.874194	4.07538	0.90358611309404	0.881493513554017	0.547476850219459	0.146583131603485	0.00627064469167411	0.910974469007108	0.952759878787439	1.11176401546854e-08	0.110651672284453	0.00282457207114547	2.95997843039335e-06	0	0	0	0	1	0	1	1	0	0	1
TanjilG_12899	OIW01359	probable WRKY transcription factor 33 isoform X1	LG11	32502824	32505572	742.527	-0.170826	1.31192	0.645237	2.60061	4.24261	0.834097	0.678028	1.9902	-0.148816	2.38744	2.20559	0.992783508851695	0.185985211531571	0.874882168155319	0.00103336820246292	2.67670699730639e-10	1	0.0065185480672283	0.00140566651693634	0.499672057446608	0.522744918613382	0.00611856937776875	0	0	0	1	1	0	0	0	0	1	1
TanjilG_12917	OIW01377	probable WRKY transcription factor 70	LG11	32029603	32031403	3150.2	1.63894	1.52368	-0.581857	-0.393044	2.86941	2.76905	1.45179	3.17484	1.03664	1.73686	3.60013	0.28561962605037	0.338155414812023	0.982426122310649	0.990410865607349	0.0155569285943169	0.73063217455737	0.636199295827335	0.000222632793807125	0.0290442548631103	0.27070748396706	0.00195747300493923	0	0	0	0	1	1	0	1	0	0	1
TanjilG_13117	OIV93290	PREDICTED: uncharacterized protein At1g66480-like isoform X2	LG18	8911772	8912837	580.406	1.87697	2.13925	0.723939	3.43081	2.46063	0.826556	1.65486	1.91136	0.459011	1.06268	2.77687	0.054528672358098	0.0150137519973782	0.857304174165013	1.79748260107669e-05	0.0038087232530074	0.911620221550144	0.838316949081128	0.000125872280982556	0.551905329942249	0.0563503978168586	0.0167876884613161	0	1	0	1	1	0	0	0	0	0	1
TanjilG_13423	OIW18671	DUF761 domain protein	LG01	22069564	22069956	32.1176	0.637028	2.54213	-0.511799	0.560136	1.24602	-0.103117	2.28355	3.42887	-1.13258	0.699762	4.47371	0.752479306239003	0.0104662138028489	0.971102193837239	0.901122538351075	0.399408391989016	0.544975362463399	0.998255269444721	1.79159703346212e-08	1	0.0304060164114784	0.00012155002895924	0	1	0	0	0	0	1	1	0	0	1
TanjilG_13726	OIW21857	adenine/guanine permease AZG2-like	Scaffold_243_13	10553	14038	39.3706	2.66703	5.09948	1.71507	2.23538	5.33904	2.88445	2.31562	7.90152	2.13503	1.0058	5.87596	0.194982477449332	0.0060669597777531	0.746599139758012	0.477408703930634	0.00144592170010414	0.699757448053556	1	2.25781649015392e-05	0.155097236669776	0.20899086555553	2.53330361590009e-07	0	1	0	0	1	0	0	1	0	0	1
TanjilG_14439	OIW07493	tropinone reductase homolog	LG07	18387743	18388924	388.794	1.3316	-0.676145	-0.0179892	-2.33746	-1.7945	-2.72686	-2.66817	-4.22926	-1.06269	-0.208664	-2.26556	0.426222948251206	0.801488433236659	1	0.132252751458484	0.305276506286664	0.704240700022656	1	0.0300367129057327	0.0285477102460173	0.01549487834695	1.00222932124063e-05	0	0	0	0	0	-1	-1	-1	0	0	-1
TanjilG_14458	OIW07512	probable glutathione S-transferase	LG07	18588222	18589606	7124.17	1.20601	2.88147	1.43289	1.10967	2.43404	1.12822	1.60646	3.09211	0.522827	1.93665	4.16022	0.457706943471136	0.00705611646570955	0.599263393712384	0.687408356158869	0.0365542263775233	0.929634394099356	0.374694459710589	2.43203444311059e-06	0.498204539423567	0.168184612945503	0.00113730186500604	0	1	0	0	1	0	0	1	0	0	1
TanjilG_14459	OIW07513	probable glutathione S-transferase	LG07	18592866	18594045	2291.44	1.28356	2.68298	2.25188	1.48337	2.20524	1.32977	2.21183	4.54839	0.39533	1.05486	5.09801	0.393957337616419	0.0115805266955096	0.151589883758841	0.435331335048133	0.06147263902346	0.971012134146351	0.941198567767781	1.34242028271096e-09	0.368459384859357	0.0340452746899683	1.54583347073043e-07	0	1	0	0	0	0	1	1	0	0	1
TanjilG_14460	OIW07514	probable glutathione S-transferase	LG07	18597251	18603039	694.363	1.23305	2.80201	1.81581	1.19618	2.31069	1.77849	3.04826	4.74417	0.303926	-0.00561871	5.38004	0.536863468119582	0.0331857764344922	0.521144834918653	0.719763493271587	0.121511176688689	1	1	1.51989788534642e-07	0.281957178264241	0.0117695478281655	7.70322077977907e-06	0	1	0	0	0	0	1	1	0	0	1
TanjilG_14526	OIV95372	universal stress protein PHOS32-like isoform X2	LG16	16139317	16144046	26.5742	2.60682	5.028	3.57635	3.99539	3.13132	2.97757	5.2197	10.1348	3.46342	2.75383	10.2957	0.263407133755572	0.0154464369786993	0.300784536302391	0.246944149987591	0.229794909024136	0.446303015430161	0.876893430457132	9.57125640781169e-08	0.351917222816331	0.015506630643124	2.7507175612508e-07	0	1	0	0	0	0	1	1	0	0	1
TanjilG_14614	OIV97069	nucleotide pyrophosphatase/phosphodiesterase-like isoform X2	LG15	10406598	10412678	563.407	0.0623996	2.02366	0.946264	-0.141018	0.405921	1.25753	1.28348	2.88181	2.09095	1.19305	2.33898	0.992783508851695	0.00212926026663252	0.569658421928377	1	0.839770624967875	0.00607070966338915	0.440868805614987	3.92970995876034e-05	0.130559342323873	0.0676414610542951	3.34674799672105e-07	0	1	0	0	0	0	0	1	1	0	1
TanjilG_15019	OIW06374	receptor-like protein 12	LG08	14864156	14867197	791.477	0.616327	2.70894	0.991844	1.37708	2.12615	1.29389	1.93914	2.43458	0.781893	1.87147	3.6894	0.642960181812302	4.28127164188215e-05	0.584251827656917	0.175020877448603	0.00248291231014825	0.636477717415718	0.0389900263214057	2.90906936632266e-10	0.151375140637937	0.00516488472325546	0.000110061072974436	0	1	0	0	1	0	0	1	0	0	1
TanjilG_15069	OIW06185	repetitive proline-rich cell wall protein 1-like isoform X1	LG08	19220721	19221441	1329.49	-1.30248	-0.119232	-1.08592	-3.97209	-5.00071	1.02361	-3.21008	-5.7564	-0.441365	-1.07842	-2.6828	0.638191286348005	1	0.912992100124637	0.0209912967759013	0.000639064005173157	1	1	0.0694979217787146	0.738839757839923	0.0359553944517655	9.9044404675751e-06	0	0	0	-1	-1	0	-1	-1	0	0	0
TanjilG_15788	OIW15405	phloem specific protein	LG03	11981779	11982093	312.313	-0.339749	-0.253887	-2.39717	-2.88244	-2.59285	0.901906	-3.01003	-3.138	0.211265	-0.791923	-1.20787	0.962506667843901	0.985849435970072	0.185555952898194	0.0265158729411161	0.0411143100375854	1	1	0.341341746828707	0.670597641355036	0.00650991704439014	0.00246549591593451	0	0	0	-1	-1	0	-1	-1	0	0	0
TanjilG_16044	OIW10672	cinnamoyl-CoA reductase-like SNL6	LG06	4120715	4123047	610.187	0.687756	1.92353	0.695358	-0.314908	0.0309135	2.01499	1.80946	2.79879	2.09416	1.63348	2.87655	0.484450012859064	0.00167289798599138	0.740795579479921	0.942958775034808	1	0.00204142045750362	0.038250971880358	1.77290332545426e-08	0.00173561179090881	0.00256583587812305	8.69372104753534e-08	0	0	0	0	0	1	0	1	1	0	1
TanjilG_16175	OIV97414	aspartic proteinase CDR1	LG15	863781	864953	9.9132	2.0758	2.44339	1.79452	7.01804	3.99033	1.10038	2.23232	6.59345	1.83695	2.99827	5.91699	0.666910430555125	0.310057260747578	0.705785056376394	0.000897701551858167	0.017198250289846	0.650934525463712	0.428217861289008	0.000488249107964103	0.682330190658722	0.169056988358073	0.000447940932609766	0	0	0	1	1	0	0	1	0	0	1
TanjilG_16308	OIW09081	pleiotropic drug resistance protein 1-like isoform X2	LG06	31373124	31379956	10159.2	-0.151086	2.54314	1.4795	0.825304	2.38894	2.12811	0.784257	2.80997	2.43251	2.9501	1.89496	0.992783508851695	0.0185794263185992	0.554405143162296	0.811487463117029	0.0337368101371612	0.0686421062418058	0.0137572898634677	0.0540540019052592	0.0830433394492111	0.592051272214107	0.00264387421548027	0	1	0	0	1	0	0	1	0	1	0
TanjilG_16461	OIW03312	cytochrome P450 81E8-like	LG10	9037024	9040624	1767.57	1.47058	2.24657	0.491492	0.75248	2.04751	1.78026	0.933121	3.25632	1.26889	1.33783	4.48797	0.150891066689402	0.00696541820286927	0.956556310281879	0.758055952214685	0.018533208850397	0.369882156882143	0.561225142401191	1.54336787838268e-11	0.0659538419043703	0.353145078293163	3.39970625761659e-06	0	1	0	0	1	0	0	1	0	0	1
TanjilG_16486	OIW13377	indole-3-acetic acid-induced protein ARG2-like	LG04	13739727	13740286	615.618	0.960578	2.18677	-1.08364	0.153336	3.12212	-0.0998472	1.36022	2.34359	-0.688334	1.3487	3.04616	0.497106850522869	0.0203941712694983	0.68169166643498	1	0.000131429116823044	0.803775164449235	0.653964199906541	5.51120843474972e-05	1	0.16519718477549	0.00406981522712051	0	1	0	0	1	0	0	1	0	0	1
TanjilG_16773	OIV98446	PREDICTED: uncharacterized protein LOC109326481	LG14	2411598	2412077	25.6049	2.46531	4.66038	1.48645	5.79016	2.68003	3.12804	2.42684	4.3344	2.24888	2.51988	6.56681	0.275411350760776	0.00788026665278509	0.852875720622095	0.0299535981454049	0.378023671595034	0.486065527221856	0.725596234890372	2.52601664881667e-05	0.128254484895184	0.215396829544128	0.00849662752579391	0	1	0	1	0	0	0	1	0	0	1
TanjilG_16893	OIV90933	3-ketoacyl-CoA synthase 6	LG20	3394586	3396076	161.233	-0.308808	-0.500852	-1.4763	-3.26675	-4.87484	-1.74261	-3.01789	-4.55547	-0.387391	0.242305	-0.985539	0.989143208910187	0.921971968731712	0.743778864703986	0.040966389715189	0.000135953627882766	1	1	0.564671709892632	0.374945631879355	0.0258321480464958	0.00016855809028509	0	0	0	-1	-1	0	-1	-1	0	0	0
TanjilG_16936	OIV90976	probable pectinesterase/pectinesterase inhibitor 41	LG20	3771390	3773566	338.968	3.94974	5.44196	3.9515	6.84703	3.15797	2.3853	3.57829	6.52263	1.09215	2.81085	6.91437	0.0557045298518083	0.00286761153977567	0.157691539584668	0.00883875496411798	0.222774362609923	0.88282582276391	0.618540064641984	4.22152756505964e-06	0.346550775145303	0.0530406972761835	5.683256906294e-05	0	1	0	1	0	0	0	1	0	0	1
TanjilG_16957	OIV90997	myb-related protein 330-like	LG20	3959763	3962505	14.2084	0.357886	0.113032	-0.467247	-5.15398	-6.21691	2.70866	-6.19787	-8.5028	-0.624115	-2.87111	-6.33804	0.992783508851695	1	1	0.0625036701378216	0.00169500964264734	1	0.693707618748028	0.00342661187485991	0.520484890524571	0.00905017778705241	5.33266449526991e-05	0	0	0	0	-1	0	-1	-1	0	0	-1
TanjilG_17675	OIW06301	PREDICTED: uncharacterized protein LOC109354159	LG08	15597399	15597947	30.6093	-0.1959	4.69374	2.41075	8.86749	4.91608	0.650542	3.10371	4.60513	-6.06132	1.56664	9.15222	0.992783508851695	0.0761887794479656	0.738012498382171	0.000921703937114366	0.047042039955844	0.0916847517774803	1	6.06657430610273e-05	0.956958511468023	0.212163270767198	0.0289781015247649	0	0	0	1	1	0	0	1	0	0	1
TanjilG_17959	OIV92608	non-specific lipid-transfer protein-like protein At5g64080	LG18	16413467	16414575	162.03	-0.609855	-0.286069	0.456016	5.75065	2.23671	-0.548058	1.17236	4.4227	-3.53797	-0.789566	4.15085	0.889069648088578	0.988942590191833	1	5.52217885390929e-06	0.21561320309459	0.0353501447160091	1	0.000388736305381827	0.900167686599112	0.511821995515124	0.000194595435919993	0	0	0	1	0	0	0	1	-1	0	1
TanjilG_18084	OIW21959	homeobox-leucine zipper protein ATHB-12-like	Scaffold_310_2	6551	7465	287.279	2.51028	4.0941	0.607564	-0.502479	1.86525	-1.19576	1.64333	5.36631	-0.41034	0.515117	4.80519	0.0194993385678512	7.58832319159839e-06	0.948623611344761	0.937775935860389	0.118130964917777	0.960632294550734	1	1.92263285287992e-09	0.415658362696312	0.120819055825342	2.92341710834673e-11	1	1	0	0	0	0	0	1	0	0	1
TanjilG_18086	OIW09756	dof zinc finger protein DOF3.4-like	LG06	16421948	16422640	81.1055	2.85883	7.70967	6.33476	6.76709	4.90053	6.83387	3.70727	10.9469	5.13183	5.52622	7.49526	0.495653770541913	0.00568159176726537	0.124185208207804	0.058988214598778	0.227145969267616	0.275496652521543	0.151904443198848	0.000532929268441478	0.0415469040526832	0.192881100192641	1.389614578158e-05	0	1	0	0	0	1	0	1	0	0	1
TanjilG_18194	OIW11921	hypothetical protein TanjilG_18194	LG05	11076412	11076696	201.352	2.22759	4.51232	2.23987	5.07405	2.23557	0.451203	2.43716	6.27211	1.70338	2.33201	6.77724	0.141706808601584	0.000274025790016172	0.338943573313224	3.92761635700114e-05	0.154982735973937	0.472627387091226	0.467312305472554	3.06382668296739e-10	0.918499962715952	0.0619339626215982	2.5180973473307e-09	0	1	0	1	0	0	0	1	0	0	1
TanjilG_18287	OIV98172	putative calcium-binding protein CML19	LG14	7834887	7835309	116.612	1.19521	2.16041	-3.81106	0.0376571	3.44599	2.44365	2.80698	0.958199	-1.4808	4.3143	1.93732	0.629520645327727	0.250398942189645	0.021472311707114	1	0.0134708050813757	0.62955075619479	0.0334425915676395	0.152660409767204	0.171096365110458	0.0497747210400008	0.60966837086881	0	0	-1	0	1	0	1	0	0	1	0
TanjilG_18334	OIW06946	glycosyltransferase BC10-like	LG08	6972219	6974087	161.081	0.984781	2.14894	0.210597	0.803512	2.17237	1.10293	1.36519	2.92752	-0.717359	1.3654	3.75691	0.456737083164799	0.0181681117104422	1	0.74566586167304	0.0160139542863921	0.77300026671138	0.603369218788966	1.25630460333939e-07	0.375260892379572	0.1490547538844	0.000111311115360985	0	1	0	0	1	0	0	1	0	0	1
TanjilG_18353	OIW06965	PREDICTED: uncharacterized protein LOC109353614	LG08	7154987	7155535	296.983	0.770567	3.07771	-4.67021	0.477944	3.30521	1.4359	2.28004	1.324	-4.21327	2.56169	0.303563	0.800187475017345	0.0211266245825649	0.00031708774327597	0.977638433250267	0.00901111497456905	0.00235311190809529	0.233566144598906	0.91581789146883	0.453359621756007	0.0835553951089513	0.364708866143763	0	1	-1	0	1	0	0	0	-1	0	0
TanjilG_18455	OIW19645	probable LRR receptor-like serine/threonine-protein kinase At1g74360 isoform X1	LG01	825314	829462	433.043	1.58765	2.46583	0.92543	0.821081	1.52282	2.44706	1.13466	3.08035	1.47345	1.31665	3.97511	0.106985181421281	0.00207085781323627	0.730297365137477	0.711175224047922	0.137942133185792	0.242741267664366	0.571137367874865	2.32310029542435e-09	0.00476566431041301	0.226223153819037	1.1786858844506e-05	0	1	0	0	0	1	0	1	0	0	1
TanjilG_18741	OIV89573	2-methylene-furan-3-one reductase-like isoform X2	KV862276	215196	218184	988.634	0.122691	2.43247	0.877755	1.24149	1.55276	0.732515	2.42782	2.4763	0.260915	1.46975	2.18861	0.966257921837227	7.11128603040686e-12	0.181307040383043	0.0044389774661721	3.2901499439315e-05	0.877261942458552	0.000577615009815237	7.07659373917332e-11	0.159263713644686	8.72126078215435e-12	1.45035369806709e-13	0	1	0	0	0	0	1	1	0	0	1
TanjilG_18844	OIW16129	U-box domain-containing protein 20-like	LG02	22029853	22031172	43.0937	2.77449	3.24438	1.23538	3.28879	3.47362	2.31082	2.98588	5.85661	0.990171	2.96704	5.47677	0.14602435435002	0.0577654429057856	0.878572828072804	0.119740011261591	0.0455433530213373	0.855456628001261	0.246300229674957	1.90298401926576e-05	0.231330467841721	0.0496000267604509	9.33081513550172e-06	0	0	0	0	1	0	1	1	0	0	1
TanjilG_19028	OIW16312	probable WRKY transcription factor 71	LG02	23688775	23690527	748.69	1.62884	1.60099	1.11623	2.23805	0.97418	2.67655	1.85404	4.57042	1.02793	1.59883	5.29575	0.094172071073562	0.0913305880440203	0.589273182452505	0.0131472583658111	0.494487739963038	0.532934350666071	0.279337665596912	4.83545494177789e-16	0.00147844487820353	0.0222122807620055	6.35637835673474e-12	0	0	0	1	0	1	0	1	0	0	1
TanjilG_19305	OIV94299	abscisate beta-glucosyltransferase-like	LG17	6981009	6982460	1837.01	1.40237	2.26876	0.205539	0.408148	1.68198	2.17874	1.71813	2.46953	1.64493	1.64652	3.70063	0.104600723137945	0.00105889858769036	1	0.918397291658642	0.0320517546951563	0.0844399492540202	0.107716541189139	2.05740419232745e-10	0.00390549671771801	0.0155345040807019	8.23046294943315e-05	0	1	0	0	0	1	0	1	0	0	1
TanjilG_19549	OIW06900	cysteine-rich receptor-like protein kinase 10	LG08	7673032	7676056	2591.92	0.418908	1.81319	0.447071	1.05444	2.1157	2.2083	1.58444	2.06555	0.242739	1.75959	2.48983	0.763962292679532	0.00357181585064857	0.914432511419107	0.293696564347513	0.000318243206049284	0.970807187240608	0.0194928756125142	2.15444852973053e-06	0.000507875166332392	0.0101132881678489	0.00019774186033921	0	0	0	0	1	1	0	1	0	0	1
TanjilG_19697	OIV99201	probable WRKY transcription factor 31 isoform X1	LG13	3889548	3892292	297.138	1.37523	2.06206	1.30984	1.46999	2.21421	1.67487	1.41924	2.79135	0.494963	1.32013	3.14984	0.075385678220811	0.00122490808380195	0.24516922182437	0.0758629005182509	0.000328660967955236	0.818602602188625	0.255641448761244	5.13053821401412e-09	0.0215482949286925	0.0333782241373811	4.99743888123385e-07	0	1	0	0	1	0	0	1	0	0	1
TanjilG_19906	OIV89539	NAC domain-containing protein 100-like	KV862279	3449	5111	229.77	0.761574	2.06572	1.27872	1.76869	2.21936	-0.0788531	1.605	2.99664	0.232391	0.673658	3.83638	0.497202000697538	0.00262459218500363	0.327149876026925	0.0299425215800912	0.000996071735385868	0.990482975199964	0.958326831427347	1.19508963823524e-11	1	0.0224265767280573	3.48167658243578e-07	0	1	0	0	1	0	0	1	0	0	1
TanjilG_19975	OIW07874	cell division control protein 45 homolog isoform X1	LG07	6981819	6982307	119.662	0.840853	1.52644	-0.0464375	0.324994	1.89962	3.40973	2.36333	2.24117	-0.511669	1.99993	2.55967	0.567041940520249	0.132626484914442	1	0.978787895733649	0.0438062494781693	0.897296444897621	0.0862536326873618	0.000532284864015664	0.000108390048601575	0.00385662934122751	0.00457056244060227	0	0	0	0	0	1	1	1	0	0	1
TanjilG_20129	OIW08028	oxalate--CoA ligase-like	LG07	9142236	9143788	1213.64	0.214993	2.03598	0.953306	0.343648	1.37254	2.00352	1.97041	3.0644	0.455048	0.263734	3.06878	0.972573032097194	0.0114251965484025	0.680155440668573	0.962661983819136	0.176508263527172	0.894152005328826	1	2.4642036996832e-06	0.0197178590665619	0.00993982959396407	4.14282741697014e-06	0	1	0	0	0	1	0	1	0	0	1
TanjilG_20856	OIW14410	probable glycosyltransferase At5g25310 isoform X1	LG03	29452493	29454401	97.5933	2.35651	3.55644	3.14554	4.08816	3.05619	2.02014	2.76408	5.38674	0.770665	1.92886	5.96359	0.195218335755188	0.023549884181458	0.178094930521593	0.026980985672164	0.0634267561084564	0.913644902129049	0.778543326538861	3.62750687066009e-07	0.327676028189802	0.0725332646100558	1.47370124347853e-05	0	1	0	1	0	0	0	1	0	0	1
TanjilG_20889	OIW00888	non-specific lipid-transfer protein 1-like isoform X2	LG12	3138586	3139219	6623.04	-0.045048	-0.932734	0.00472692	-2.73497	-5.05874	-1.15999	-1.27573	-3.56035	-0.672757	0.0733878	-2.16555	0.992783508851695	0.436454055871971	1	0.000444488393941636	1.90881066804651e-14	0.765309218756062	1	0.0020433213992617	0.28145555326877	0.137534077014752	7.83421805808399e-08	0	0	0	-1	-1	0	0	-1	0	0	-1
TanjilG_20917	OIW04561	anthranilate N-methyltransferase-like	LG09	17198035	17201217	137.23	1.38073	1.18271	0.517282	1.76405	2.11911	0.662248	2.24417	2.66268	1.58361	3.1591	4.31647	0.32157810457988	0.412648946129517	0.975892632561758	0.230741693368741	0.0659310145349618	0.338835131064929	0.00243108458197122	7.63034038209468e-08	0.751201232947043	0.0199852701847573	0.00317645904974426	0	0	0	0	0	0	1	1	0	1	1
TanjilG_21081	OIV93370	ethylene-responsive transcription factor 1A-like	LG18	7338306	7338989	140.227	1.56382	1.97402	0.904284	0.648778	1.39358	2.59176	1.31367	2.86348	2.64398	2.22408	3.99809	0.24886520893345	0.114144924005638	0.852317527448396	0.895035914800929	0.392658708366928	0.0415700449801119	0.178278454740183	3.88187037779661e-06	0.0236931681789002	0.284824091588479	0.00270834706118454	0	0	0	0	0	1	0	1	1	0	1
TanjilG_21195	OIV90063	glutamate dehydrogenase 1-like	LG20	21433535	21437521	1301.37	4.34479	4.24987	1.09328	2.08544	2.00328	1.31821	1.77807	5.38484	1.6767	-0.240694	6.81355	0.0112095624835433	0.00883499038092926	0.921942332594166	0.520423705221256	0.455020855130827	0.647952631361256	1	1.82662135485082e-07	0.644629381138257	0.359715182054703	0.000105152808899656	1	1	0	0	0	0	0	1	0	0	1
TanjilG_21436	OIW14296	WRKY transcription factor WRKY24-like	LG04	841692	845956	154.738	3.18532	5.25634	2.30912	5.96249	7.24562	3.98019	5.91297	6.46843	3.32984	2.86761	10.1584	0.400858774707195	0.0740773410462107	0.834509471877074	0.109305351373434	0.0160424557613179	0.589675471454457	0.920555466259297	4.51812857796375e-06	0.253280209197493	0.0267593006532267	0.0059986371300615	0	0	0	0	1	0	1	1	0	0	1
TanjilG_21557	OIV95167	RING-H2 finger protein ATL3-like	LG16	18349978	18350898	98.8318	1.10921	2.55849	-0.126098	0.798957	5.2447	3.10293	1.49576	3.77956	0.806319	3.2259	3.51306	0.616244518108229	0.0738398994731675	1	0.888925264404811	4.09636909630748e-06	0.866364957703518	0.0507590015539645	0.00127116019852954	0.0265533334818226	0.323957224485339	0.000786503733563983	0	0	0	0	1	1	0	1	0	0	1
TanjilG_21946	OIW10109	putative glycosyltransferase	LG06	9761971	9764365	304.581	0.71522	1.12628	2.36674	2.90703	1.66527	0.3294	1.24685	2.18237	0.488019	1.92599	2.73619	0.655912371374879	0.352640113663365	0.0269619280482161	0.00116244994330921	0.122169748163186	0.896340529402051	0.113740118567531	0.000183478968795242	0.906410950402842	0.185860608391533	0.00523543009200445	0	0	1	1	0	0	0	1	0	0	1
TanjilG_22087	OIV94890	protein DETOXIFICATION 49-like	LG17	912873	914459	30.6499	3.40074	3.05962	1.14844	3.14426	4.41973	3.03218	3.75002	10.4706	-0.273608	1.68666	4.21354	0.0929698419336009	0.132656617416439	0.922584188171548	0.210997970741384	0.0353492599112909	1	0.954800098861365	0.00693911370660811	0.156016991603662	0.0479358134408716	4.04719103253278e-08	0	0	0	0	1	0	1	1	0	0	1
TanjilG_22210	OIV95013	PREDICTED: pectinesterase-like	LG17	66322	68453	555.547	2.19085	2.20076	0.864909	1.56337	1.40891	1.65244	1.2904	3.23873	0.504557	0.558033	4.00753	0.00605798202674195	0.00297786144738579	0.721027781695612	0.118636890154285	0.138369343434888	0.859893845348338	0.998255269444721	6.84653360366441e-11	0.0605514227683201	0.108568273143529	3.17553705003617e-07	1	1	0	0	0	0	0	1	0	0	1
TanjilG_22287	OIW03630	protein SAR DEFICIENT 1-like	LG10	3119619	3123104	104.519	0.3167	1.84483	1.29516	2.06033	4.32763	3.45136	2.72135	0.59562	0.8005	2.69245	4.30732	0.986800196096234	0.291671609318009	0.794983108435375	0.322233529381085	0.000191276495153062	0.892272605514257	0.189113381063297	6.78059831149002e-05	0.00954269034330763	0.0290635856468054	0.778935535151992	0	0	0	0	1	1	1	0	0	0	1
TanjilG_22316	OIW18118	Avr9/Cf-9 rapidly elicited protein, putative	LG01	27869676	27870110	95.6185	0.956953	1.8224	2.03776	1.02203	2.46689	-0.172892	2.78853	3.19055	1.27621	1.73067	3.75358	0.520582129299792	0.0853078893335385	0.15388039672648	0.651743632001618	0.0181593247795945	0.46034271424401	0.40881123219673	1.80846946571737e-06	0.995725352215133	0.00151533596286338	6.69016338561023e-05	0	0	0	0	1	0	1	1	0	0	1
TanjilG_22671	OIW19175	signal recognition particle subunit SRP72-like	LG01	9286478	9290716	49.9373	-2.78188	-0.420537	-1.17283	-1.78202	-1.6834	2.6068	-2.07055	-4.34431	-0.734745	0.302518	-1.32834	0.00757240998489955	0.875974327431146	0.634527095722411	0.148376577910213	0.145090182917718	0.854014980523873	1	0.218561192469245	0.0260251172379448	0.0320771031291315	8.09860748526163e-08	-1	0	0	0	0	1	-1	-1	0	0	0
TanjilG_22680	OIW00882	probable WRKY transcription factor 33	LG12	3437535	3441397	67.1618	-0.00716889	1.25746	2.82033	3.7214	4.74432	1.0989	1.11848	3.09969	0.319207	5.24846	2.33113	0.998571319999095	0.572142605139775	0.191305100038274	0.0244356052918304	0.000111212339111677	1	0.000624416018247871	0.0641192194391583	0.632276031779805	0.531013894166803	0.0136994883319657	0	0	0	1	1	0	0	1	0	1	0
TanjilG_22946	OIW11139	chalcone synthase 1-like	LG06	355086	356610	15595.5	1.44108	2.26692	1.33821	1.40439	1.73593	2.52478	1.95036	3.41075	1.45197	1.30726	3.74039	0.0569348366957389	0.000244827050561814	0.214138921510717	0.096213726118348	0.00983666530842587	0.100763033837425	0.257535656738661	1.27219942518043e-12	0.000109797438918722	0.00180406358002918	2.52682894994016e-10	0	1	0	0	0	1	0	1	0	0	1
TanjilG_22951	OIW11144	transcription factor MYB39-like	LG06	319684	320782	76.5726	-0.537613	-0.628044	2.73045	5.32241	2.13452	-0.551172	0.0706766	2.61817	-3.71443	-1.38266	6.01039	0.905926652333922	0.853663980442345	0.145431858645236	7.50568790195988e-06	0.198046534268449	0.0401901789820148	0.915143781715612	6.28694420699962e-08	0.881295655193716	1	0.0284461999362642	0	0	0	1	0	0	0	1	-1	0	1
TanjilG_23023	OIV92423	NAC domain-containing protein 72-like isoform X1	LG19	1653223	1655898	679.44	2.28826	2.37301	1.02316	0.239454	1.34486	-0.568344	1.13251	4.43446	-0.438895	0.460941	4.67419	0.0406564176579237	0.0255881877272627	0.7790979819165	1	0.384810898716145	0.948231247869632	1	7.33047655299911e-09	0.79760429424067	0.344937076311244	8.63830135454746e-08	1	1	0	0	0	0	0	1	0	0	1
TanjilG_23503	OIW05717	non-cyanogenic beta-glucosidase-like	LG08	24280117	24288158	1196.1	1.72067	8.28459	1.77485	3.83985	4.24264	3.77424	2.97059	9.8756	2.19818	3.0531	8.18315	0.545939214965246	1.43235000741688e-07	0.778068224082836	0.0734833526834527	0.0235892550456386	0.512409072828019	0.428217861289008	5.73309063173468e-09	0.0637963876479066	0.10383380603943	5.64478834633013e-12	0	1	0	0	1	0	0	1	0	0	1
TanjilG_23914	OIW04911	salicylate carboxymethyltransferase-like	LG09	9866494	9869090	67.7153	0.560718	-0.99113	-3.26608	-2.9458	-4.58105	-0.747627	-5.47241	-4.298	-1.1781	-0.320473	-4.73323	0.95032436456791	0.811674480676752	0.323557132763121	0.261600727057143	0.0103747259654601	0.869560784438895	1	0.0354288886843448	0.883788104532366	0.00280535790384537	0.00823203101131083	0	0	0	0	-1	0	-1	-1	0	0	-1
TanjilG_23938	OIW02230	hypothetical protein TanjilG_23938	LG11	6712698	6712973	31.5947	4.27524	3.30546	0.900344	0.62986	5.91738	4.73886	4.81789	6.45347	3.20879	5.54048	7.77879	0.158262937347092	0.252849584148826	1	1	0.0205487700838505	0.454586278724463	0.209090887539206	0.000159622247461687	0.0633259382826465	0.040651073959961	0.0013409829983038	0	0	0	0	1	0	1	1	0	0	1
TanjilG_24046	OIW02595	PREDICTED: uncharacterized protein LOC109360818	LG11	2685310	2685762	86.6646	0.391179	3.29676	0.307494	-0.787737	3.02546	2.36572	1.30617	4.74606	0.435514	0.563904	4.51615	0.938937864345754	0.0031386809642975	1	0.85726959101874	0.00720395327779317	0.967756383057411	1	1.02994811112824e-06	0.0620338931167815	0.312581135378247	1.5952554437397e-07	0	1	0	0	1	0	0	1	0	0	1
TanjilG_24296	OIW00566	probable receptor-like protein kinase At1g11050	LG12	12470657	12472513	16.3257	2.77762	3.44586	0.681457	4.68403	2.82734	0.855295	3.79862	2.08752	3.32705	3.72699	1.47363	0.171183673457238	0.0208016679839287	0.985773457487623	0.00558764582775677	0.0587978454354276	0.144001483155103	0.0362061561461787	0.288927245253671	0.740463252739903	0.00285560510940366	0.122532634295069	0	1	0	1	0	0	1	0	0	1	0
TanjilG_24551	OIW19838	1-aminocyclopropane-1-carboxylate synthase	Scaffold_5_186	17614	20731	598.746	3.17496	2.70618	3.03896	2.48095	3.90506	4.44172	2.96303	6.18797	3.55395	3.48448	8.87354	0.0657520522847792	0.130480924181897	0.217138262551467	0.308110688886962	0.0106692981831096	0.0647987305384237	0.0910653282210513	2.45353665963659e-13	0.0047910685006416	0.0526386261890036	8.79504110186827e-07	0	0	0	0	1	1	0	1	0	0	1
TanjilG_24565	OIW12632	GABA transporter 1-like	LG04	26112819	26115612	115.665	1.82305	1.49479	0.588758	2.88726	2.15685	0.283568	1.86155	3.15969	0.27238	0.823266	2.57063	0.0444030553256559	0.115891497374515	0.902037282547807	0.000195798431089537	0.00779061607929502	0.98729966832485	0.938616073277878	0.000171467806911834	0.924864212358665	0.0174457264778127	3.00594939817886e-06	0	0	0	1	1	0	0	1	0	0	1
TanjilG_24935	OIW20857	zinc finger protein ZAT10	Scaffold_50_48	3973	4659	332.96	0.899553	1.74782	-2.40177	0.952769	3.13822	2.729	1.99921	2.15551	-1.28689	3.59735	1.86281	0.653377095517113	0.207312627209884	0.130677663930957	0.769722473818303	0.00275003692118836	0.579836248621952	0.00372684488050406	0.0766434676794234	0.0231659174291314	0.0773749407771599	0.04081122531823	0	0	0	0	1	1	0	1	0	1	0
TanjilG_25638	OIV94576	transcription factor bHLH25-like isoform X2	LG17	5758977	5760841	295.223	1.88332	1.84353	2.52478	4.08931	0.870933	0.764291	2.16532	3.22804	1.26505	2.11801	5.90765	0.136232050080858	0.130480924181897	0.0663299133337515	3.56281069647141e-05	0.701995244027689	0.536510077215104	0.189951176964845	4.69318043218837e-13	0.692886149093721	0.0331000471163153	0.000288659836818423	0	0	0	1	0	0	1	1	0	0	1
TanjilG_25808	OIW11895	ABC transporter G family member 11-like	LG05	11913808	11919113	220.359	-0.315962	-0.593976	-1.13493	-2.14504	-3.19083	-0.983132	-1.3644	-2.75594	-0.479551	-0.0645856	-2.07299	0.90928730254348	0.698513078180871	0.534417415744986	0.0104239354801949	4.9867017861571e-06	0.875975093638404	1	0.00260913843838735	0.372777359345075	0.0961612881118966	3.96594765181756e-05	0	0	0	-1	-1	0	0	-1	0	0	-1
TanjilG_25848	OIV94624	ethylene-responsive transcription factor 1A-like	LG17	3046087	3046866	348.822	1.85841	3.70953	-0.6437	1.6751	3.49388	3.38506	2.00399	4.04915	2.45931	0.931333	1.9952	0.342071343654547	0.00953198039220371	0.99534370718437	0.5858573321658	0.0169208282181274	0.257047611720933	1	0.155668693223056	0.0308618517581752	0.212261143749125	0.00120848792824672	0	1	0	0	1	1	0	1	0	0	0
TanjilG_25899	OIV94675	transcription factor RAX3-like	LG17	2678825	2680294	132.829	1.86624	3.30468	1.81893	1.84672	1.61001	0.44993	3.12767	2.44434	-0.272767	1.92918	3.37886	0.0346692973654812	5.83675362547856e-06	0.113517677743434	0.0525849734846353	0.0859982626277355	0.985414798771008	0.070740502307125	2.10471895363313e-07	0.808144042933044	3.98603770401625e-05	0.000513681747680687	0	1	0	0	0	0	1	1	0	0	1
TanjilG_26087	OIV99749	protein ALP1-like	LG12	16682374	16683783	940.427	1.08025	3.13663	-6.41036	0.456953	3.15021	0.112359	0.287827	0.668979	-5.38106	1.86378	-0.000206138	0.658935115412669	0.023254551459091	1.18035905480843e-07	0.987569971745728	0.0218888768036045	1.98041079058672e-05	0.720936624502992	1	1	0.956858509533732	0.751933550261664	0	1	-1	0	1	0	0	0	-1	0	0
TanjilG_26093	OIV99755	cytokinin dehydrogenase 3-like	LG12	16737298	16741840	90.1478	7.17904	6.24197	3.79077	7.94036	8.69369	0	5.56409	11.668	2.95425	3.44963	9.99653	0.0509882756370426	0.0973537361775705	0.599263393712384	0.0334316796926862	0.00740426662294613	0.747241110491235	0.896841021502482	6.80807018280256e-05	1	0.105232865472221	2.49642156428984e-05	0	0	0	1	1	0	0	1	0	0	1
TanjilG_26142	OIV99804	probable xyloglucan endotransglucosylase/hydrolase protein 23	LG12	17142642	17143733	428.513	0.883376	2.13573	-1.15931	1.93789	2.40964	-0.488904	0.921247	2.61154	-3.05646	1.01458	2.47362	0.61914353557663	0.0541417669585262	0.704064909036216	0.153521866332752	0.022882955841097	0.00627979496530231	0.940826398150431	0.00532949350029207	0.846264375110149	0.477486297959312	0.00402362366491055	0	0	0	0	1	0	0	1	-1	0	1
TanjilG_26269	OIV99931	early nodulin-93	LG12	18015117	18015594	98.2374	4.67326	8.72109	9.16012	7.26232	3.86063	0.662172	1.67907	6.58958	2.0315	0	9.99441	0.186803180600127	0.00350144309201102	0.0130447868317384	0.0543002836143247	0.488920743305468	0.812069587538927	1	0.000100791660683339	0.972295035141423	0.68975757128356	0.00918010512084264	0	1	1	0	0	0	0	1	0	0	1
TanjilG_26612	OIV91759	polyphenol oxidase, chloroplastic-like	LG19	16860047	16861630	12.384	1.84483	1.99609	3.06577	6.05168	4.64663	-0.900609	0.360583	3.78279	1.98085	1.03527	8.73253	0.53536385968605	0.49875473895112	0.418014734448273	0.0243975966867257	0.0320201519717677	0.80071064362861	1	9.95186413239273e-06	0.912267427568289	0.969887791749804	0.0269455123156981	0	0	0	1	1	0	0	1	0	0	1
TanjilG_26661	OIW02121	protein NRT1/ PTR FAMILY 2.13-like	LG11	8626875	8630776	16.2858	-6.97528	-2.98331	-1.1382	-1.85861	-1.55733	0.454085	-2.42614	-7.00742	-0.75242	-1.67657	-2.12487	0.000132057211634342	0.00163604999747913	0.672143006435858	0.106939714536729	0.214373521402519	0.926278653122241	0.677147953517284	0.253923353547483	0.966465746499071	0.02355221204375	7.94736647764757e-06	-1	-1	0	0	0	0	-1	-1	0	0	0
TanjilG_26887	OIW11521	NAC domain-containing protein 72-like isoform X1	LG05	22568116	22569859	712.898	2.98016	3.62988	1.36858	0.564407	1.21169	0.117279	1.14025	5.15737	-0.295019	0.158404	6.43594	0.00990322599779163	0.00041117428333166	0.649698980991143	0.934239594726668	0.53292911687795	1	1	1.14683577976687e-13	1	0.395955939826162	8.26311897316145e-09	1	1	0	0	0	0	0	1	0	0	1
TanjilG_26950	OIW11584	protein DOG1-like 4	LG05	21787409	21789268	17.7892	-0.305586	5.20543	0.363577	1.4503	0.843232	2.27525	2.84971	4.05169	0.667739	2.24414	2.26099	0.977980484654287	0.00208817562037068	1	0.522763837638716	0.743714960251525	0.963625698669203	0.552155271433544	0.0264074917545447	0.178629103408356	0.0472286733505536	5.73322794091548e-05	0	1	0	0	0	0	1	1	0	0	1
TanjilG_26992	OIV95888	probable leucine-rich repeat receptor-like protein kinase At5g49770	LG16	1268330	1274062	38.2576	2.01756	4.39565	1.98253	2.48827	2.66225	1.66889	2.26214	6.32682	3.6099	2.32623	4.87015	0.235097495849046	0.00327972284584963	0.521376023949912	0.240995341387972	0.0617554235298577	0.0497127274451428	0.40261283507642	1.64072546088914e-05	0.345217488475268	0.0908206716334543	3.00400385674096e-09	0	1	0	0	0	0	0	1	1	0	1
TanjilG_27016	OIV95912	hypothetical protein TanjilG_27016	LG16	1485654	1494265	510.466	1.42445	2.11591	1.87076	1.79646	3.42556	1.73446	0.93598	2.92842	1.24764	1.00273	4.69291	0.169496249507678	0.0129484941241844	0.121554695054236	0.0872924565172706	2.73488081286457e-06	0.403207663233597	0.870635853126914	9.03318394940077e-12	0.075359343138026	0.34823732143579	3.86368895150959e-05	0	1	0	0	1	0	0	1	0	0	1
TanjilG_27540	OIW00289	BTB/POZ and TAZ domain-containing protein 1-like isoform X1	LG12	15155063	15158643	121.377	0.0535215	2.20455	-0.5437	-0.347943	1.32345	1.90433	0.425263	2.03349	2.64469	0.161373	3.35762	0.992783508851695	0.0145724645596055	0.945633688890417	0.975859320101135	0.308527295606116	0.00990411523681105	1	6.1872026519281e-06	0.0643937687621803	0.796216266558882	0.0122253918223373	0	1	0	0	0	0	0	1	1	0	1
TanjilG_27612	OIV98521	EG45-like domain containing protein	LG14	7896	8144	6162.72	2.16076	4.45749	1.72117	0.954572	2.76298	0.141048	2.54816	6.86591	3.05617	1.86575	8.06013	0.173219906903473	0.000140789276240544	0.587840451191075	0.833965213192836	0.0510329839739241	0.0781239996222958	0.67545193751272	7.52129786304422e-16	1	0.0463027333763027	2.09324136373182e-11	0	1	0	0	0	0	1	1	0	0	1
TanjilG_27613	OIV89101	hypothetical protein TanjilG_27613	KV862415	12214	13590	274.057	-1.50982	1.58703	-1.41321	-0.209049	2.29714	1.09675	0.329381	2.28998	2.52176	2.65581	3.59895	0.266405357971593	0.224847873373492	0.574062521017734	1	0.0432544194007293	0.058889242477787	0.0367753275417305	2.52380711307392e-05	0.48167568477984	0.894120988940815	0.0156793176464755	0	0	0	0	1	0	0	1	0	1	1
TanjilG_27990	OIW10239	Polygalacturonase protein	LG06	8017625	8019994	71.3473	3.86433	7.88142	-3.13568	17.2943	14.2616	2.68029	1.54435	4.31712	0.516413	0.170024	16.7177	0.29034950820038	0.00386588287909569	0.710646693628459	1.01734028942813e-10	6.95413638044927e-07	1	1	5.54611311819493e-11	0.540764630072192	0.732824328528852	0.137320513141568	0	1	0	1	1	0	0	0	0	0	1
TanjilG_28038	OIW10287	probable calcium-binding protein CML45	LG06	8406764	8407132	58.1864	1.14003	2.20264	0.958918	0.908565	2.67499	1.94045	3.50362	1.81499	-0.568556	1.19732	2.86846	0.457688319220973	0.0480112238508126	0.813248788694514	0.756686026322086	0.0104158070709411	0.912094395286076	0.910465659516076	0.0014624373975203	0.107770678899957	0.000177954714875781	0.064435908396093	0	1	0	0	1	0	1	0	0	0	1
TanjilG_28577	OIW12169	PREDICTED: uncharacterized protein LOC109347147	LG05	4058169	4058522	98.5133	4.06863	5.64362	2.12817	8.17991	4.09705	2.1747	3.22942	9.27133	2.20101	3.12901	7.59935	0.0877396899101716	0.00286761153977567	0.717930973085277	0.000180983137141959	0.0538944156669423	0.616783919468534	0.522146056260183	1.69488238371978e-06	0.4698839671253	0.100196358183316	1.960178650954e-06	0	1	0	1	0	0	0	1	0	0	1
TanjilG_28706	OIV93549	cytochrome P450 86A22	LG18	2048014	2049648	924.455	-0.230751	-0.919434	-0.964994	-3.39979	-3.04258	-0.46465	-2.85822	-3.94702	-0.740755	-0.740908	-0.982592	0.992783508851695	0.713091139116843	0.889250561629639	0.0123013967999788	0.0213142212909548	0.888069533894908	1	0.516713036409158	0.912620778043765	0.0198256926680823	0.000313424296302396	0	0	0	-1	-1	0	-1	-1	0	0	0
TanjilG_28878	OIW05413	UDP-glycosyltransferase 83A1-like	LG09	1493204	1496387	39.7267	2.0838	8.40525	2.41584	2.75313	5.84943	2.46642	2.11302	7.13806	5.6201	3.26647	9.04965	0.675507410908657	0.000968946399254005	0.761197880987262	0.597492526524969	0.0167643473103599	0.131686761685253	0.725084801756665	2.18429888503098e-05	0.449265997192617	0.461113814593935	0.000249503313106737	0	1	0	0	1	0	0	1	0	0	1
TanjilG_29145	OIW00155	probable WRKY transcription factor 23	LG12	16004142	16005622	118.713	1.79471	2.27416	1.39938	2.15713	1.46212	1.11853	1.90307	2.56893	-0.911012	1.67117	3.6799	0.0490834510921999	0.00430493346726506	0.376133119041135	0.020420596119511	0.148810044939913	0.59915220288659	0.209683032376719	2.74587799846666e-08	0.313512234379755	0.0162851882984454	0.000319121098029304	0	1	0	1	0	0	0	1	0	0	1
TanjilG_29263	OIW13522	RING-H2 finger protein ATL3-like	LG04	10237513	10238391	468.363	0.146512	1.39867	0.201438	1.258	2.65187	1.56949	0.848312	2.48641	1.11934	2.05665	2.50223	0.992783508851695	0.13029277338362	1	0.312077895601434	0.000177359402691167	0.406453536426808	0.0282416729036686	0.000133372065091441	0.0873351447249574	0.368449745156556	0.000232747860737776	0	0	0	0	1	0	0	1	0	1	1
TanjilG_29314	OIW13573	respiratory burst oxidase homolog protein B-like	LG04	10681818	10688798	6022.61	1.59611	2.05759	0.978943	1.26986	2.05961	-0.110158	1.10725	3.07165	0.4539	1.50098	3.07535	0.00523880268162084	3.61693337943893e-05	0.338943573313224	0.0518775785754776	2.44892095116266e-05	0.770923508378549	0.021032093179302	1.64469507779971e-12	0.99057977333429	0.0449490475159478	3.47522455261626e-12	0	1	0	0	1	0	0	1	0	0	1
TanjilG_29366	OIV98963	proline-rich extensin-like protein EPR1	LG13	6756017	6757414	860.573	-1.13406	-0.522737	-0.270488	-3.96337	-5.79775	-0.11987	-3.30442	-5.16494	-0.976424	-0.966018	-2.30163	0.702142509468609	0.931384008342678	1	0.0177647981761597	3.60268243147672e-05	0.864737747700211	1	0.125809096546058	1	0.0261726152245538	7.06022536321161e-05	0	0	0	-1	-1	0	-1	-1	0	0	0
TanjilG_29422	OIW02646	U-box domain-containing protein 20-like	LG11	2093810	2095129	563.358	1.91019	2.1161	-3.09744	0.497586	3.36636	1.35628	1.92454	3.19769	-1.94425	2.02942	2.82222	0.211934015478984	0.143821061890552	0.0434403206842656	0.967520129710843	0.00414478579280058	0.316670386813024	0.491078409432109	0.00848203488015743	0.450249177008583	0.133505237531876	0.00306118456789865	0	0	-1	0	1	0	0	1	0	0	1
TanjilG_29452	OIW02676	PREDICTED: uncharacterized protein LOC109360015	LG11	1910018	1910326	11.6245	1.98965	2.65969	0.955387	4.00145	4.86822	2.98969	7.56392	4.29477	-1.68854	1.52427	7.96357	0.431578890906265	0.167051151270772	0.957439117595234	0.0520407329808161	0.0266911028704249	0.801584258324162	0.96911706308839	1.44476676786952e-05	0.354624244443966	0.000229718604848368	0.00312214276881444	0	0	0	0	1	0	1	1	0	0	1
TanjilG_29643	OIW02867	TMV resistance protein N-like	LG11	510494	511628	18.3383	1.18156	4.59355	1.17863	-0.0325166	1.00028	5.17325	3.07199	5.12133	-0.104019	0.345927	8.41712	0.69081364981852	0.0597429519776639	0.891780425808634	1	0.782801144901188	1	1	1.49513482835029e-06	0.0321200214489225	0.0434290962513214	3.12930395276445e-05	0	0	0	0	0	1	1	1	0	0	1
TanjilG_29868	OIW06112	NAC domain-containing protein 72-like	LG08	20847252	20848433	247.057	2.53552	2.15603	-1.19797	-0.0551431	1.45818	0.353807	0.40057	3.31955	-0.94484	0.688227	2.1264	0.0173364550106196	0.0492298102179431	0.681469317268912	1	0.305276506286664	0.697773932701167	1	0.0185825369888235	0.919555756337651	0.84652671874307	0.00011786531428047	1	1	0	0	0	0	0	1	0	0	1
TanjilG_30359	OIV91137	zinc finger protein ZAT10-like	LG20	2713328	2714137	663.243	1.53547	2.27544	-1.69529	-0.0279498	2.52554	0.336815	1.34243	2.07793	-1.29468	0.912423	2.58989	0.139263549357982	0.0077298804517153	0.222122880369073	1	0.00176680279059871	0.360501842023365	0.928480767968925	0.000341205959320933	0.900167686599112	0.139891329883682	0.00751018758792174	0	1	0	0	1	0	0	1	0	0	1
TanjilG_30385	OIV91163	hypothetical protein TanjilG_30385	LG20	2509729	2513877	56.3827	3.28867	1.55613	0.752974	1.52338	2.81342	2.59428	2.36697	3.42612	1.77574	2.77576	3.42712	0.00683925840042388	0.326642276471981	0.932830139652473	0.528161484519568	0.0294456292323614	0.36020341087289	0.0818349643883766	0.000510855870017871	0.0533269857851604	0.0571852313712836	0.000849318682606066	1	0	0	0	1	0	0	1	0	0	1
TanjilG_30614	OIW14895	putative receptor protein kinase ZmPK1	LG03	24187049	24189457	158.555	2.08668	2.09318	0.877084	2.55154	4.8756	2.16264	1.92577	2.67367	3.51426	3.45259	1.75711	0.0700522450249803	0.0618647766944156	0.849828649932258	0.0513506858230905	2.09456659350725e-05	0.000668797406124413	0.000979922416798532	0.0620492684304667	0.0569681734355345	0.0587896117691085	0.00288102493007593	0	0	0	0	1	0	0	1	1	1	0
TanjilG_30736	OIW03672	Arabinogalactan peptide 22	LG10	2732371	2732672	15.4564	1.62025	5.33062	2.26873	3.18083	1.31976	4.98979	3.45501	4.39961	3.21676	2.14769	4.62193	0.623826357919981	0.00695292254527476	0.746229976016404	0.531815877266016	0.802181500910489	0.309842824667412	0.96911706308839	0.0123615173084441	0.0151510244494644	0.0923056259692488	0.013151625010099	0	1	0	0	0	1	0	1	0	0	1
TanjilG_30919	OIW01445	isoliquiritigenin 2'-O-methyltransferase-like isoform X1	LG11	29385580	29392600	188.779	0.0664357	2.7403	1.26765	2.54575	1.93015	3.52957	1.25866	3.41299	2.14907	1.09118	4.76141	0.992783508851695	0.0131247049463018	0.694356790615324	0.0523908764579591	0.180564148595007	0.172574479822415	0.944064516382086	6.17053533130771e-08	0.00118742595666614	0.321730365040502	0.000261797340921246	0	1	0	0	0	1	0	1	0	0	1
TanjilG_30959	OIW03539	hypothetical protein TanjilG_30959	LG10	4176060	4176308	326.881	0.171139	-0.0209303	-0.29663	0.291469	0.011406	16.6107	-7.17216	8.65998	15.7986	0	2.18417	0.992783508851695	1	1	1	1	1.88366095018628e-08	1	0.561420299832091	1.6820976274843e-10	0.00291224783149559	0.000309205174105762	0	0	0	0	0	1	-1	1	1	0	0
TanjilG_31264	OIW18144	fatty acid amide hydrolase-like	LG01	25868296	25876055	306.859	0.25326	-1.17159	-0.0901708	-2.39236	-2.73137	-1.49729	-2.4811	-4.66734	-1.48644	-0.77757	-1.01306	0.970156947771536	0.372876548267538	1	0.0215290135620613	0.00231270161395434	0.31951343641623	0.974037829178631	0.310080824983909	0.208095511067636	0.00504823771712486	3.51236500914855e-09	0	0	0	-1	-1	0	-1	-1	0	0	0
TanjilG_31585	OIW21289	hypothetical protein TanjilG_31585	Scaffold_87_27	9835	10071	113.897	2.51725	1.49872	0.898705	1.35083	2.33291	1.64037	2.17115	3.47735	0.386384	-0.232714	5.22908	0.0258695700903055	0.276665388665672	0.847376744532733	0.536599728314851	0.0535208595048324	0.972970968929437	1	3.30834214987853e-10	0.22382560543899	0.0398336963463554	9.74160009210932e-05	1	0	0	0	0	0	1	1	0	0	1
TanjilG_31679	OIW13790	AT-hook motif nuclear-localized protein 19-like	LG04	7016790	7017635	43.8156	-0.943395	1.80119	1.32858	0.910314	3.6128	2.25357	2.19474	3.63416	0.528984	3.97158	9.19914	0.776137119466577	0.386700997085977	0.835839804198595	0.901935107778786	0.0454379366142243	0.977102883266102	0.0416956862991859	1.29006162626491e-08	0.249353998330466	0.174974565471246	0.00790501441494784	0	0	0	0	1	0	0	1	0	1	1
TanjilG_31710	OIW13821	protein ECERIFERUM 26-like	LG04	7483981	7486165	297.669	-0.390608	-1.28233	-0.332304	-2.10894	-4.24561	-1.07348	-1.33671	-2.98991	-0.60805	-0.493383	-2.6379	0.879409887842703	0.246364322761383	1	0.0283053040157423	4.50275766693289e-09	0.827985741253017	1	0.000267430773206163	0.370140085920688	0.139231790894433	3.96594765181756e-05	0	0	0	-1	-1	0	0	-1	0	0	-1
TanjilG_31888	OIW19991	ethylene-responsive transcription factor 1B-like	Scaffold_9_54	19421	20071	432.28	0.34828	1.55726	-0.363308	-0.605079	3.25924	2.75448	1.47803	4.4632	1.30245	1.86615	3.64886	0.947800816628798	0.262901081239683	1	0.914171462558701	0.00104896296085054	0.533626419708523	0.427596006830173	3.6633724311167e-05	0.0151046849302248	0.210985896081364	4.28193701617362e-07	0	0	0	0	1	1	0	1	0	0	1
TanjilG_32101	OIW09952	1-aminocyclopropane-1-carboxylate synthase-like	LG06	12909565	12910447	100.142	3.26956	3.39248	4.49323	1.06386	3.66908	3.21822	2.36038	5.92476	4.43354	3.4477	8.54234	0.0830769546263701	0.0629998489600059	0.0553091470387954	0.893935388429994	0.039786600969189	0.0305473545922519	0.200929387871949	6.30764140978995e-10	0.100998032458465	0.212630016105738	2.05828243667019e-05	0	0	0	0	1	0	0	1	1	0	1
TanjilG_32460	OIW12344	phenolic glucoside malonyltransferase 1-like	LG05	1700900	1702270	488.39	0.93183	2.43335	2.13657	2.32728	2.74107	-0.0731627	-0.112626	0.649104	0.170807	0.913865	1.69682	0.23457411366667	5.4909853764466e-06	0.000771181040722527	7.41286068035684e-05	2.88303120179793e-07	1	0.596556767427675	0.000726889492103353	1	0.968955489047086	0.323251024224303	0	1	1	1	1	0	0	0	0	0	0
TanjilG_32590	OIW04398	probable WRKY transcription factor 25 isoform X1	LG09	19574186	19576877	1607.37	0.916757	2.1371	0.964396	1.70748	2.49377	1.38937	1.99691	3.00295	0.367943	1.89549	3.02935	0.331014308470154	0.00102387506635809	0.559758102360586	0.0276129623248933	4.51226805304704e-05	0.910592194833355	0.0184991017169468	4.35602663976731e-08	0.0857483397267566	0.00195131644621975	1.00992624623182e-07	0	1	0	0	1	0	0	1	0	0	1
TanjilG_32595	OIW04403	cationic peroxidase 1-like	LG09	19645338	19648062	24.6461	4.62857	7.12685	6.01842	0.820392	0.637256	1.81545	0.54239	3.68588	0.0174519	0.0668868	2.15639	0.00250167359909404	0.000332131467098991	0.0181202491779872	0.919742301097536	0.920298998093759	1	1	0.115889490826748	0.363478640150255	0.859330545611442	0.00270959471933441	1	1	1	0	0	0	0	1	0	0	0
TanjilG_32704	OIW07848	ethylene-responsive transcription factor ABR1-like isoform X2	LG07	10715411	10717221	208.358	2.50011	6.5854	0.282204	5.55743	2.52635	2.29862	5.11376	11.3535	1.35789	2.09641	10.6597	0.437754738769355	0.00346391677643097	1	0.096213726118348	0.508494226563429	0.873222048042047	0.968240550907097	7.87943326097264e-08	0.494863828534695	0.0258585705451323	4.47850553779049e-07	0	1	0	0	0	0	1	1	0	0	1
TanjilG_32977	OIW14635	protein-tyrosine-phosphatase MKP1-like	LG03	26181349	26183178	69.3173	-1.03577	2.37454	0.137944	1.4038	3.01321	1.46757	1.64984	5.11082	1.94892	3.04305	5.06189	0.601936055351342	0.0666645775140554	1	0.572592825330559	0.0114403319196688	0.292113277854347	0.0388854792104918	1.31464793817434e-07	0.365748604915342	0.200080206403806	3.17553705003617e-07	0	0	0	0	1	0	0	1	0	1	1
TanjilG_33074	OIW13425	glycine-rich cell wall structural protein 1-like	LG04	12148941	12149426	761.068	-0.582757	-0.93543	-0.27964	-2.3578	-4.23815	-0.290263	-0.455849	-2.18209	-0.278506	0.131118	-2.01809	0.712142499082767	0.423440840019977	1	0.00411914832494838	4.83069458059589e-10	0.979925839812592	1	0.00419526034267394	0.914607460644331	0.723591578093613	0.00220128061751973	0	0	0	-1	-1	0	0	-1	0	0	-1
TanjilG_00065	OIW16642	protein DETOXIFICATION 21-like	Scaffold_1_148	12061	17477	1073.51	1.50993	2.099	0.17885	-0.0179215	0.69671	0.198425	1.13774	2.78889	0.95251	0.742063	2.94468	0.0529695625488999	0.00148524221452615	1	1	0.601064780177207	0.443628243610353	0.927154464472089	1.49884189033104e-07	0.955091631048338	0.119349629381447	1.28257697157094e-06	0	1	0	0	0	0	0	1	0	0	1
TanjilG_00087	OIV92910	---NA---	LG18	13825077	13825556	99.9333	0.0665227	-0.495669	0.648675	5.77663	2.24212	-1.062	1.48108	5.39913	-3.5412	-1.47455	5.68277	0.992783508851695	0.959098255505688	1	0.000504139838640254	0.388227472389532	0.155187651510703	0.96911706308839	9.85529763563612e-05	0.770121064738058	0.495393215620731	0.000250518659065302	0	0	0	1	0	0	0	1	0	0	1
TanjilG_00163	OIV97134	WUSCHEL-related homeobox 9-like	LG15	7450696	7452738	8.23881	3.48083	-0.175199	-1.3631	1.87641	3.71165	-3.33877	0.283931	3.83826	4.24719	-1.08973	5.69775	0.242189164825602	1	0.86128358817517	0.592890691753551	0.0490713320541526	0.205823941732479	1	0.00134461153268695	0.160042113261962	0.973406689526879	0.0148488169642382	0	0	0	0	1	0	0	1	0	0	1
TanjilG_00297	OIV92279	E3 ubiquitin-protein ligase PUB23-like	LG19	4258564	4259799	29.1343	0.692111	2.25422	-0.128546	2.23781	5.29294	3.10973	4.05273	2.13544	1.15935	5.98848	2.5977	0.875965001323557	0.278742699719222	1	0.475521596175698	0.0255056258635667	0.791479622417292	0.00775108425226542	0.0673576951624529	0.0803680380188669	0.0127637198672756	0.17604882382201	0	0	0	0	1	0	1	0	0	1	0
TanjilG_00341	OIW17747	cytochrome P450 71A1-like	LG01	34699039	34701673	123.742	0.0689869	1.15808	1.24625	3.70391	2.77488	-1.68333	1.89025	1.70178	0.318988	0.899868	3.28365	0.992783508851695	0.296046859384692	0.475475929983581	2.29044290024344e-06	0.000336206559634522	0.969119057761042	0.910019942749901	9.14632717408136e-07	0.0693807814953493	0.0148550972180114	0.0236119111530136	0	0	0	1	1	0	0	0	0	0	1
TanjilG_00391	OIW10453	platelet glycoprotein Ib alpha chain-like	LG06	5863999	5864343	138.912	0.411986	1.44457	0.9298	4.33105	2.75816	-0.707983	0.230967	3.05535	-4.8314	-2.14771	6.95645	0.990740325359337	0.693842434026036	0.98049325422152	0.0435603964555897	0.288626527976278	0.0476525397194139	0.878881932275029	1.30877410885942e-05	0.907008681118683	0.996415621708437	0.0937361263200395	0	0	0	1	0	0	0	0	-1	0	1
TanjilG_00394	OIW10456	pre-mRNA polyadenylation factor FIP1-like	LG06	5870793	5871149	88.6487	0.603284	1.952	1.04232	3.04604	1.65019	-0.0750827	1.03275	3.838	-6.20125	-1.7877	5.60734	0.959095643985983	0.608144349482008	0.961014597992849	0.378049031287178	0.697160552770296	0.0219292873045796	0.947819706847024	0.000332726935483411	1	0.717928311940438	0.0219319120612708	0	0	0	0	0	0	0	1	-1	0	1
TanjilG_00498	OIV96916	protein DOWNY MILDEW RESISTANCE 6	LG15	13393373	13398560	311.172	1.71272	1.75739	-0.6693	-0.540221	1.68681	1.02347	2.50535	3.47009	1.02506	2.71254	4.08528	0.231851654060081	0.206304344339371	0.948993635054153	0.944382770168428	0.283724746835603	0.724242260825942	0.0618413497923958	7.99494168028083e-06	0.578432796588741	0.0207309865258841	0.000342989996311981	0	0	0	0	0	0	1	1	0	0	1
TanjilG_00511	OIV96929	hypothetical protein TanjilG_00511	LG15	13649784	13650053	379.315	1.25152	1.85359	-1.90618	0.742303	3.71129	1.17575	1.52108	2.0574	-1.03494	1.74676	2.23605	0.275547454776842	0.053279993329782	0.129150959214566	0.774847942710507	4.62259221718671e-07	0.551161360282816	0.218936227102897	0.00289231970495726	0.319084925091555	0.0876295605997437	0.00931375265384864	0	0	0	0	1	0	0	1	0	0	1
TanjilG_00548	OIV96966	hypothetical protein TanjilG_00548	LG15	14756448	14757257	62.9858	0.4398	1.7031	0.321041	0.785734	2.37529	0.611693	1.22856	2.41546	0.12164	0.173536	2.80468	0.800448322811385	0.0149431897382861	0.990730376707676	0.59709144836966	0.000359229033583051	1	1	2.77849007449734e-07	0.608250677598663	0.0778691162212173	2.52181100785139e-05	0	0	0	0	1	0	0	1	0	0	1
TanjilG_00769	OIW04209	glycerol-3-phosphate acyltransferase 1-like	LG09	21296137	21298222	52.1642	0.382857	1.88255	0.424034	4.70293	2.45231	0.130198	0.373467	3.90073	-2.90019	-1.70012	4.39304	0.992783508851695	0.544243655210022	1	0.0223176670514889	0.382918263325478	0.358807196423722	0.962951236325401	0.00937783416301724	1	0.962732028472938	0.0227162372240016	0	0	0	1	0	0	0	1	0	0	1
TanjilG_00816	OIW04256	pectinesterase QRT1-like	LG09	21578956	21580765	15.1113	3.02721	-4.70648	0.555777	8.23485	3.67415	-0.72337	0.154226	2.58608	-6.80914	-1.50903	3.43839	0.232778834749703	0.0814442121460043	1	0.000197561586608828	0.0927872608765121	0.00996096153473189	0.973272166447904	0.0316960876846903	0.927545656481828	1	0.141166406302123	0	0	0	1	0	0	0	0	-1	0	1
TanjilG_00828	OIW04268	uncharacterized membrane protein At1g06890-like	LG09	21640207	21642615	27.8845	4.55989	5.97962	4.8015	2.56067	6.63313	-1.8465	5.39223	7.52181	2.94267	-0.0591524	7.20371	0.230268555986083	0.0649078434119531	0.376133119041135	0.754961338393426	0.0336326828901248	0.69097959955643	1	0.000636619415971375	0.792645853719711	0.0704135519115269	0.00242953541116185	0	0	0	0	1	0	0	1	0	0	1
TanjilG_00971	OIV92837	VQ motif-containing protein 29	LG18	14831022	14831294	167.467	1.51962	3.12935	0.144172	0.671841	2.08823	2.21948	1.23579	2.39355	1.23938	2.12244	3.22039	0.249986845905443	0.00152236245616039	1	0.877022867245787	0.0829408480599733	0.537461678129536	0.225988337622376	0.000188031671090814	0.0572282424487708	0.312895179947285	0.0108199865410456	0	1	0	0	0	0	0	1	0	0	1
TanjilG_01046	OIW13478	F-box protein PP2-B15-like	LG04	10897843	10899557	732.012	-0.533724	3.03569	0.273152	0.659833	-0.309127	0.77355	2.07843	2.78596	1.08674	1.08405	2.39646	0.892340079126576	0.0149964344996641	1	0.92345393477683	0.998040387315896	0.731440809900709	0.96911706308839	0.0326848967288753	0.755135129142704	0.0996406574551271	0.0129703092188555	0	1	0	0	0	0	0	1	0	0	1
TanjilG_01173	OIW04977	cinnamoyl-CoA reductase 2-like	LG09	8530325	8533487	50.6936	1.54624	-1.45704	1.10419	9.31099	1.51362	0.897818	0.224504	5.5048	-1.85077	-0.399015	8.44264	0.758593663348205	0.775371501920449	0.989426023849605	0.000727825872028716	0.810117258538254	0.793189827426543	1	0.000474105065127163	0.903718059930055	1	0.0188609611304254	0	0	0	1	0	0	0	1	0	0	1
TanjilG_01243	OIW09272	gibberellin 3-beta-dioxygenase 1-like	LG06	28884208	28887145	17.3808	3.42445	7.67607	5.72657	3.93851	3.63671	5.99701	4.95785	7.78967	0.926243	4.362	5.42566	0.353848525686004	0.0157734144456109	0.300258702340988	0.548970450939628	0.516377297210924	0.984185045419383	0.727683216389819	0.03347787784597	0.107016327203844	0.137940700553554	0.00562277701063027	0	1	0	0	0	0	0	1	0	0	1
TanjilG_01305	OIW09334	probable WRKY transcription factor 40	LG06	29579190	29580684	1855.89	1.08226	2.25804	0.03237	0.623139	1.5294	1.44703	1.66499	3.41873	0.422681	1.45122	2.92213	0.145564815428708	4.38549021962058e-05	1	0.691272497606231	0.0147169156186359	0.843626158513277	0.072346402658203	2.34160549455152e-09	0.0327546237014136	0.00400649245643739	2.99489136374193e-12	0	1	0	0	0	0	0	1	0	0	1
TanjilG_01488	OIV95694	probably inactive leucine-rich repeat receptor-like protein kinase At2g25790	LG16	6912926	6915181	477.28	0.658604	1.65253	1.38335	1.96496	1.38607	2.26008	1.72162	2.02124	-0.122973	1.28197	3.4672	0.659175866281839	0.0644295879516874	0.369859700242953	0.032778503107638	0.176828803432857	1	0.561937597974969	1.08977598055614e-07	0.00721212997730426	0.0299977675228049	0.00559024610356999	0	0	0	0	0	1	0	1	0	0	1
TanjilG_01534	OIV90080	plant cysteine oxidase 2-like	LG20	21285663	21289455	120.422	-0.705316	2.68045	0.501862	1.16117	0.115557	0.632116	1.92447	2.76253	0.155878	0.294906	4.12209	0.807274660045923	0.0208680713398391	0.995502821593038	0.683282028283838	1	1	1	5.2464703337955e-06	0.800420769579767	0.0899947158523596	0.00575636123518771	0	1	0	0	0	0	0	1	0	0	1
TanjilG_01705	OIV90624	oleosin 1	LG20	8399766	8400185	533.372	-3.76018	-1.24797	-1.17855	-0.282063	-1.16263	3.40427	-1.22806	-2.86601	0.275294	-0.794293	-1.59485	0.00143796459082256	0.478878315615527	0.767877312186713	1	0.594037862376836	1	1	0.164590341491465	0.0047910685006416	0.380650957679283	0.00606537129047189	-1	0	0	0	0	1	0	-1	0	0	0
TanjilG_01714	OIV90633	myb-related protein 340-like	LG20	8321006	8322155	8.39748	3.65305	0.0395467	0.817297	1.75661	1.84703	3.73265	2.22174	4.09394	0	-0.766111	5.3946	0.175671786769946	1	0.952981914070881	0.548970450939628	0.377378299094484	1	1	0.00118617080468792	0.0273265484461431	0.299289004879024	0.0266487640594164	0	0	0	0	0	1	0	1	0	0	1
TanjilG_01940	OIV91322	basic 7S globulin 2-like	LG20	1311953	1313242	136.476	0.869942	1.78238	0.950499	0.00466133	0.368855	2.03914	2.56352	3.78223	1.10377	2.50531	3.75433	0.616244518108229	0.137855746012692	0.806218936803069	1	0.954412889874496	0.607110037333301	0.0592855601563179	5.83343384983034e-06	0.0786782537843864	0.00810520949684371	1.04946764128392e-05	0	0	0	0	0	0	1	1	0	0	1
TanjilG_02235	OIV92472	protein SRG1-like	LG19	1025965	1027516	19.3891	-1.58203	0.369038	1.75395	4.65929	3.25033	3.8672	2.01472	3.75349	1.888	-1.02702	4.71045	0.59750698926794	0.98274811850197	0.743695048112227	0.0104239354801949	0.069864897812398	0.581740197967906	1	0.00158331528679355	0.137651016697733	0.294253381742676	0.012110186728763	0	0	0	1	0	0	0	1	0	0	1
TanjilG_02249	OIV92486	protodermal factor 1-like isoform X2	LG19	807367	809024	11.7724	6.21279	0.596708	-1.56011	21.0693	0.363333	21.4085	-19.0725	-3.71397	0	0	0	0.649311058195198	1	1	0.0084475860151007	1	1	1	1	0.0062325708010793	0.00826208586685529	0.756124292753425	0	0	0	1	0	1	-1	0	0	0	0
TanjilG_02265	OIV92502	probable LRR receptor-like serine/threonine-protein kinase At3g47570	LG19	682751	685913	40.7643	0.421829	2.91897	0.74272	1.77502	3.62963	2.80035	4.124	1.66996	-1.062	1.20352	7.3606	0.972963145756858	0.0970200140531078	0.985773457487623	0.602505675084505	0.0255916466030913	0.874003696674328	0.986407401811251	1.4167584926051e-07	0.143842723542009	0.0040305182625677	0.330586196292435	0	0	0	0	1	0	1	0	0	0	1
TanjilG_02470	OIW17842	hypothetical protein TanjilG_02470	LG01	33715734	33716075	82.8811	1.11768	1.71555	0.815367	1.95222	3.75334	0.373555	1.87978	2.69806	-1.92748	0.841513	3.6274	0.342830995962694	0.0664089287365284	0.794983108435375	0.0457372895922596	2.75793897514849e-07	0.0886860338656578	0.944064516382086	7.11515332375425e-08	0.870038026214557	0.0200192164733794	0.000172921035543838	0	0	0	0	1	0	0	1	0	0	1
TanjilG_02509	OIW17220	cyclic nucleotide-gated ion channel 1-like isoform X1	LG02	3602971	3606755	1075.26	0.256375	1.49609	0.30792	0.856164	2.09201	1.7074	1.86771	2.3816	-0.0151932	0.992033	2.35568	0.932156690987311	0.0527840375154149	0.998746389787285	0.564373258331046	0.00167848011259194	1	0.709977891463283	6.32819478180779e-05	0.026944816556417	0.00509607316694846	7.97146026637916e-05	0	0	0	0	1	0	0	1	0	0	1
TanjilG_02674	OIW07040	probable pectinesterase 53	LG08	6062878	6066366	318.103	-0.440535	-1.88502	0.747363	-1.33022	-2.72593	-0.718238	-0.781413	-3.00107	-0.287022	-0.683908	-2.55492	0.843699351543843	0.039299107024488	0.838709436331317	0.340160506373962	0.00055534540859774	0.98479382035633	0.980230858921963	0.00071012585548337	0.624809678698298	0.470559982015503	3.4089614253459e-05	0	0	0	0	-1	0	0	-1	0	0	-1
TanjilG_02851	OIW13331	18 kDa seed maturation protein-like	LG04	14741883	14742958	84.0023	2.69549	3.35424	1.40574	0.175536	1.33897	0.0770719	0.598251	1.40056	-1.25784	0.810707	2.61353	0.0240806287997795	0.000639885437900749	0.577223940270793	1	0.430507058491483	0.577243630733599	0.983525254623233	0.0031863946069266	1	0.72280019730295	0.189236360705204	1	1	0	0	0	0	0	0	0	0	1
TanjilG_02949	OIV93412	protein LOL1-like isoform X2	LG18	6253390	6267015	64.3646	3.38201	-0.589754	0.539112	4.18073	0.806048	-1.69749	2.33826	2.83028	2.63205	0.943433	-1.49777	0.0256016068906947	0.893167114195879	1	0.00483071312515245	0.85246267834609	0.204826459974078	1	0.385154611391679	0.38419946204087	0.10744141962034	0.0368286979844745	1	0	0	1	0	0	0	1	0	0	0
TanjilG_02969	OIW08293	scarecrow-like protein 21 isoform X1	LG07	4204176	4205936	205.999	0.546208	2.00813	0.228931	1.61224	1.4518	1.79781	1.22332	2.36736	-1.3613	1.06298	3.22416	0.795105232608735	0.0392905771544105	1	0.219261643844759	0.233174615608708	0.367979421350196	0.881711336463571	1.60027774797391e-05	0.0955984906506284	0.231575302992191	0.00365216487103149	0	1	0	0	0	0	0	1	0	0	1
TanjilG_03137	OIW08461	E3 ubiquitin-protein ligase PUB23-like	LG07	2744919	2746724	27.6501	4.07699	2.71697	3.63536	5.34756	5.58386	3.66044	1.87589	4.1867	4.3671	3.98382	6.62467	0.0731494835657391	0.322604040154486	0.495817545330202	0.103399144471877	0.031338418670656	0.119134164540383	0.287676732419853	0.00037783349504574	0.137931228152621	0.48011263740278	0.0333451019169884	0	0	0	0	1	0	0	1	0	0	1
TanjilG_03149	OIW08473	probable CCR4-associated factor 1 homolog 9	LG07	2634180	2635124	785.089	1.16432	1.99996	-1.84691	0.59686	3.90276	1.42725	0.27757	2.73335	-0.204943	1.18598	2.68554	0.371223345972456	0.0469630707254584	0.215843435555578	0.881386078991137	9.97649252152511e-07	1	0.803404127250138	0.000669770818677672	0.233244027262724	0.908730348915283	0.00074124884839041	0	0	0	0	1	0	0	1	0	0	1
TanjilG_03221	OIW08545	high affinity nitrate transporter 2.4	LG07	2114870	2117259	9.16355	-5.34066	6.84171	0.0850925	2.78595	3.37662	6.65225	4.09175	2.26154	1.95044	4.9282	5.35115	0.0777905694109265	0.00869082235672194	1	0.508173793217887	0.458342627376719	0.800487231285161	0.127396952188152	0.0268220284225752	0.0178154198531335	0.0642109954649528	0.344120396909568	0	1	0	0	0	1	0	0	0	0	1
TanjilG_03263	OIW08587	LOB domain-containing protein 1-like isoform X1	LG07	1783556	1784861	40.2031	1.05419	3.01515	1.20175	1.06153	0.671509	2.13676	1.16345	3.12378	-0.636209	2.61554	3.12746	0.578805074835257	0.0130292994711556	0.751851149558025	0.73288237882651	0.834425731514473	0.911569094123252	0.0892553165657241	0.00237721431089636	0.137139014203149	0.41210519753747	0.00321703462995642	0	1	0	0	0	0	0	1	0	0	1
TanjilG_03329	OIW08653	lignin-forming anionic peroxidase-like	LG07	1313490	1314903	32.0106	3.42374	0.513856	5.96527	5.10614	5.77494	3.70962	4.32951	9.36149	3.42967	7.33479	10.3861	0.257207016717102	0.987230140557571	0.167211082477824	0.21623353856041	0.0767068476928132	0.394338113957497	0.0324782553920933	7.73232884640415e-06	0.223532874849686	0.092560677489307	0.000110898454176664	0	0	0	0	0	0	0	1	0	1	1
TanjilG_03469	OIW19335	auxin-responsive protein SAUR50-like	LG01	3713992	3714360	6.87656	4.11867	6.76773	2.72258	0	0	-2.37335	0.0810601	5.64691	2.35504	0.718487	6.98834	0.239060056559911	0.0223645557105817	0.830582618036676	1	1	0.669457906025234	1	0.00541909590182022	0.536174092456114	1	0.0377324080791626	0	1	0	0	0	0	0	1	0	0	1
TanjilG_03689	OIW05300	probable leucine-rich repeat receptor-like serine/threonine-protein kinase At3g14840 isoform X3	LG09	3131706	3133478	373.03	1.1324	2.19035	1.28103	0.240921	1.18124	0.934972	0.391477	2.16802	0.927744	0.777693	2.91738	0.148393946355015	0.000267350331932234	0.22236648295848	0.981178379719515	0.136624813401339	0.402151867452188	0.853710390744567	1.37349855360862e-08	0.269705998424567	0.696627621552937	7.57723404141277e-05	0	1	0	0	0	0	0	1	0	0	1
TanjilG_03884	OIW01746	Blue copper protein	LG11	18804238	18805231	56.6757	4.95315	0.550481	1.45809	10.3362	2.89895	0.188176	0.657087	6.01069	-1.77275	-1.77168	7.87328	0.126966621254191	0.973970614557168	0.912992100124637	1.76155367040283e-05	0.359455820921797	0.769495842888114	0.974037829178631	4.44309233468292e-05	1	0.899152567864337	0.00184645216663867	0	0	0	1	0	0	0	1	0	0	1
TanjilG_04023	OIW06629	dehydration-responsive element-binding protein 1A-like	LG08	10046576	10047226	240.384	0.516906	2.05593	-3.62197	-0.059915	2.96556	-1.07827	0.874737	0.903985	-2.73616	0.870915	0.783275	0.852831486038247	0.0785589215977357	0.000699959726855537	1	0.00236393876059863	0.0242257629909291	0.973474904704338	0.522801509698974	0.50384014591839	0.524135148707515	0.478115934827216	0	0	-1	0	1	0	0	0	-1	0	0
TanjilG_04060	OIW06666	carbonic anhydrase, chloroplastic isoform X1	LG08	10329198	10331529	56.3945	3.80577	0.371671	-1.47885	-4.84486	-22.084	-18.1902	-1.42186	-6.79319	0.363977	-0.470147	-2.4152	0.382617423472901	1	0.999750648266141	0.416068466717828	5.39478209513918e-15	1	1	0.569551921637237	9.97379828269862e-09	0.825728135019023	0.0199590546162212	0	0	0	0	-1	-1	0	-1	0	0	0
TanjilG_04117	OIW12368	putative glutamine amidotransferase GAT1_2.1	LG05	122427	123873	34.0385	15.0386	4.72884	-1.83643	-1.27993	-1.41821	-1.6883	2.78516	3.53001	-0.946045	44.5157	9.98447	1.28878695280964e-07	0.199866830030215	0.932755929517818	0.949172883574325	0.873607793323157	0.984807334873971	2.82003808541623e-82	5.71597093639719e-05	0.783550038713321	0.434672123765809	0.219423978166216	1	0	0	0	0	0	0	0	0	1	1
TanjilG_04136	OIW12387	probable galactinol--sucrose galactosyltransferase 5	LG05	350930	355130	211.247	-0.0266179	-0.442298	2.27091	4.19439	3.84903	-1.37511	0.493984	0.91095	-1.11775	-0.0893871	0.0667875	0.992783508851695	0.843844943798365	0.0381132120298193	4.50036009329624e-08	2.2418923739146e-07	0.536885226861931	1	1	0.223169727175886	0.723919653439337	0.365725469070413	0	0	1	1	1	0	0	0	0	0	0
TanjilG_04145	OIW12396	cinnamoyl-CoA reductase-like SNL6	LG05	451681	460231	417.721	1.2348	1.40085	0.694888	0.845895	1.60694	0.929379	0.956808	2.8773	0.837453	2.05963	4.69745	0.218535782994552	0.134379028195971	0.838861238212565	0.656384223796531	0.0726360982800989	0.632606563850524	0.0314173410591953	3.00598357979946e-14	0.413418928537103	0.29362535261135	1.38191918190431e-05	0	0	0	0	0	0	0	1	0	1	1
TanjilG_04340	OIW15805	putative phytosulfokines 6 isoform X2	LG03	818934	819582	197.763	2.5126	0.608783	0.636941	2.42369	1.70051	1.87473	1.66228	2.52624	0.901395	-0.373153	0.848878	0.00628251615129299	0.730979591689859	0.901526441251722	0.00822949683966996	0.0976140209318444	0.650230492602536	1	0.371464901190365	0.0637087328715872	0.0585097277193877	0.000862157261777113	1	0	0	1	0	0	0	1	0	0	0
TanjilG_04424	OIW15889	GDSL esterase/lipase APG	LG03	1358697	1360572	157.953	0.275796	0.320524	-0.289447	-1.54735	-1.88964	-0.210447	-3.11538	-3.65373	-0.932549	-0.74872	-2.04195	0.975881005867246	0.952755308186974	1	0.466933155242495	0.206769860310975	0.738031125480711	1	0.0450251394986886	0.990836633734046	0.00168524287754224	5.77575759539929e-05	0	0	0	0	0	0	-1	-1	0	0	-1
TanjilG_04496	OIW15961	Pectinesterase, catalytic	LG03	1893509	1898462	256.476	1.11376	1.45045	4.05822	-1.63811	3.52447	0	-0.25312	20.4139	17.3861	-20.8291	0	0.972727416639653	0.928167795963812	0.79366256274694	0.974010190651979	0.692653068663894	7.17838231317815e-05	1.44132421349036e-07	1	1	1	1.87776837394467e-08	0	0	0	0	0	0	0	1	1	-1	0
TanjilG_04565	OIW16030	keratin-associated protein 5-4-like isoform X1	LG03	2525534	2545954	26.2658	0.276439	2.32638	0.0773404	3.68453	1.18296	2.69432	3.95496	3.45594	2.11695	3.20355	1.82931	0.992783508851695	0.229431966737699	1	0.023677069658008	0.707328377344719	0.390930198353075	0.148650955151726	0.20519611801055	0.126497599283954	0.00430350812049362	0.0128785231580086	0	0	0	1	0	0	1	1	0	0	0
TanjilG_04592	OIW16057	U-box domain-containing protein 21-like	LG03	2811827	2813143	41.0004	1.532	2.8997	1.53027	2.36449	5.55228	3.1632	2.33208	3.87499	0.603687	1.76408	6.26659	0.586127575266639	0.0974334804198876	0.796823634752595	0.412644152601433	0.00645871322542422	0.966052343097616	0.877215159848407	5.76906732833503e-07	0.0842683149214887	0.151729549438121	0.00484802032412542	0	0	0	0	1	0	0	1	0	0	1
TanjilG_04700	OIW12536	heavy metal-associated isoprenylated plant protein 39-like	LG04	26947407	26947899	585.796	0.496099	1.69632	-2.46137	-0.22072	3.52894	2.98399	2.68304	1.53461	-1.38255	2.64362	1.88873	0.878008018765485	0.204343566084224	0.0955995286138256	1	0.000268619220236599	0.492704809541888	0.0532469555009462	0.0600497036980214	0.0073409122880429	0.00855699587809533	0.164641908492918	0	0	0	0	1	1	1	0	0	0	0
TanjilG_04788	OIV93556	F-box protein At2g26160	LG18	651244	652341	232.949	1.15434	1.83743	-0.291249	0.685691	2.37325	1.48128	1.38418	2.27932	-0.819854	1.48373	2.62094	0.256098090677681	0.0220156456078696	1	0.755957481064556	0.000913139114307475	0.633599597457402	0.27862511593127	4.1486120691758e-05	0.108679522515722	0.0798920981767146	0.000727628200132911	0	0	0	0	1	0	0	1	0	0	1
TanjilG_04829	OIV93597	PREDICTED: uncharacterized protein LOC109332821	LG18	1024209	1024580	24.3914	2.99321	4.78926	1.84969	2.54746	7.15218	2.18289	3.1876	5.61146	-0.142899	6.92259	2.68635	0.121786185069591	0.0534030388415592	0.749937356209538	0.419726795529098	0.000561448630806438	1	0.00410225650278243	0.0687934996344792	0.296132699112641	0.0632932684825048	3.34637503166655e-05	0	0	0	0	1	0	0	1	0	1	0
TanjilG_05040	OIW02447	anthocyanidin 3-O-glucosyltransferase 2-like	LG11	4121533	4122978	229.597	-0.200428	1.28886	-0.551874	0.127847	0.813285	2.18629	1.4844	2.32941	1.33736	1.17353	4.52201	0.98797831412398	0.256263079085135	0.935503854087472	1	0.631323608737337	0.354241194690612	0.741761082451988	3.13709236700944e-11	0.0191319363860633	0.0946263549438155	0.00225847663383024	0	0	0	0	0	1	0	1	0	0	1
TanjilG_05106	OIV96266	stress protein DDR48-like	LG15	20784889	20786076	1067.37	1.88119	0.154621	4.39823	0.456334	0.727115	-4.38207	1.96075	1.11928	1.02221	0.249769	3.38572	0.410840012767955	1	0.0195751988449834	1	0.908792661978098	0.863005769474352	1	0.0181330185913444	0.00774821032437293	0.280283784857516	0.601990058333523	0	0	1	0	0	-1	0	0	0	0	1
TanjilG_05247	OIW06476	NAC domain-containing protein 92-like	LG08	12192535	12194067	44.0541	2.21745	2.55475	2.15825	3.63405	2.41212	0.131431	0.823604	5.68538	-0.780243	0.500469	6.83927	0.267542296235297	0.140483862426583	0.47933602681112	0.0312331499724936	0.191721509617702	0.911569094123252	1	4.96504840670114e-08	1	0.71244577415624	9.17430574888517e-06	0	0	0	1	0	0	0	1	0	0	1
TanjilG_05315	OIV95767	gibberellin 2-beta-dioxygenase-like	LG16	4945429	4948931	70.1586	0.515021	-0.0229386	2.54846	3.22372	2.30219	1.09398	2.2258	1.84466	-0.189388	1.95136	5.87542	0.871892739847131	1	0.0936254429908607	0.0102018136381996	0.0689039620221663	1	0.417493559831352	1.38097271072642e-09	0.528426820872861	0.0425851770469926	0.0895924093852311	0	0	0	1	0	0	1	0	0	0	1
TanjilG_05525	OIW21516	Alpha-amylase protein	Scaffold_139_16	5031	6961	1588.4	1.85515	2.35071	1.17544	0.862023	1.26083	0.179852	1.21023	4.25128	-0.635963	0.379169	4.56811	0.00670790983238335	7.39446191249043e-05	0.323557132763121	0.499187396926452	0.103556224268898	0.68521343284718	1	2.45555402628512e-19	0.960538885109964	0.0698786320345237	1.94874360770108e-16	0	1	0	0	0	0	0	1	0	0	1
TanjilG_05682	OIV93979	pollen receptor-like kinase 2	LG17	19458831	19481582	10.7434	-2.61046	-3.24155	-2.13984	-4.08295	-4.34128	0	-5.22986	-4.92538	1.8671	-0.335245	0.468641	0.271736046986118	0.189725710286416	0.683906870001869	0.0618960736766011	0.0333995365253773	0.661508351280424	1	0.913663358060386	1	0.0266483585433568	0.0309512656579677	0	0	0	0	-1	0	-1	-1	0	0	0
TanjilG_05789	OIW00439	nuclear transcription factor Y subunit B-3-like	LG12	13361789	13362280	437.238	-0.334806	-1.05989	-0.36241	-1.62828	-0.375197	3.14293	-2.70291	-2.27904	0.357448	-0.32586	-1.52381	0.954690263994797	0.544243655210022	1	0.365146180386397	0.961558839630873	0.985756230601646	1	0.153627678843509	0.00461952083980011	0.00840378601978196	0.0229713601803903	0	0	0	0	0	1	-1	-1	0	0	0
TanjilG_05839	OIW00489	NAC domain-containing protein 2-like	LG12	13857256	13858497	551.94	1.42067	2.03076	-0.415767	-0.496681	0.989065	1.38479	1.36874	2.5775	1.61771	1.32591	4.20218	0.165902238227765	0.017622245743047	0.983470720232447	0.901935107778786	0.482287852386214	0.17320074201281	0.567138529463374	2.22143576278444e-10	0.18618714635472	0.119299203408864	0.000360818700013785	0	1	0	0	0	0	0	1	0	0	1
TanjilG_05891	OIW08915	bark storage protein A	LG06	32582662	32586647	15.4125	1.64673	1.19481	1.25911	8.17805	3.40096	2.26828	2.10008	1.40842	2.65645	2.38245	4.64685	0.418959832670519	0.617602205050844	0.799244986170198	1.29737178419175e-05	0.0223933911651031	0.187163880174768	0.401182790154872	0.000134513670983167	0.265811639731327	0.197461913969377	0.529301869608152	0	0	0	1	1	0	0	0	0	0	1
TanjilG_05924	OIW08948	hypothetical protein TanjilG_05921	LG06	32303836	32304915	19.7522	0.270514	-0.673501	3.7261	8.85551	7.36455	-3.48197	1.66882	1.01947	0	-0.793491	5.67755	0.992783508851695	0.954719760693064	0.546792396572396	0.000969284101914415	0.00110548795300197	1	1	0.0163726697017251	0.391493751307991	0.610721907582883	0.785516392243509	0	0	0	1	1	0	0	0	0	0	1
TanjilG_05947	OIW08971	serine/threonine-protein kinase-like protein ACR4	LG06	32114599	32117274	34.4118	-0.937874	-1.03588	-0.621591	-1.26881	-2.2445	-0.833295	-1.22187	-2.34563	-0.597725	-0.655425	-2.59815	0.457706943471136	0.411978089977876	0.897861987789738	0.37689670103732	0.0157325564986134	0.851350718762604	0.994558874901108	0.00268343347283217	0.55657409974292	0.203800690202284	0.00275796523733728	0	0	0	0	-1	0	0	-1	0	0	-1
TanjilG_06066	OIW12277	PREDICTED: uncharacterized protein LOC109347141	LG05	2798834	2799409	490.251	1.41899	1.77692	0.996658	1.184	1.03942	1.5863	2.32993	2.43238	0.752848	1.01583	2.47471	0.0240816021418752	0.00121735706211189	0.368317149918289	0.114238753481706	0.147122829290076	0.504162877411615	0.466943332154625	1.81744575854104e-07	0.00890832472356702	8.26013881797753e-06	3.48308915794711e-07	0	0	0	0	0	0	1	1	0	0	1
TanjilG_06153	OIW21535	peroxidase 12-like	Scaffold_144_12	29459	31579	6641.72	2.90864	5.26387	0.556607	4.23631	-0.0958613	1.47828	1.96292	4.31611	2.66845	0.758177	1.74446	0.0632573410289754	1.91793994842341e-05	1	0.00219922673893697	1	0.170987817528092	1	0.214969384522401	0.479136656638657	0.193396092889946	0.000291422635600144	0	1	0	1	0	0	0	1	0	0	0
TanjilG_06163	OIW09772	probable disease resistance protein At5g66900 isoform X1	LG06	15812427	15813671	109.81	-0.0329481	2.01757	-1.70855	1.33222	3.26285	0.804278	1.57999	1.72011	-2.49742	1.2502	3.68786	0.992783508851695	0.0794423231576177	0.376133119041135	0.477408703930634	0.000400435275599475	0.0486323177346393	0.83956342618043	1.1161837681897e-05	0.659928404713165	0.140597292155643	0.0854180492523882	0	0	0	0	1	0	0	0	-1	0	1
TanjilG_06187	OIV94724	transcription factor HEC1-like	LG17	2248440	2249096	59.9284	1.79936	2.76697	6.958	4.19387	2.92486	2.07556	1.80056	5.59988	1.17037	3.1163	3.43212	0.310054851451011	0.101317635831965	0.00229220966208799	0.142708741242413	0.108477761191908	0.731765811463442	0.0892553165657241	0.00357427242233102	0.216729240437308	0.229503410418613	3.67239000493703e-06	0	0	1	0	0	0	0	1	0	0	1
TanjilG_06225	OIW05089	type I inositol polyphosphate 5-phosphatase 8-like isoform X2	LG09	6823235	6829122	121.348	0.189359	1.09987	0.80251	2.54045	2.08462	1.86545	1.00275	2.69074	0.426668	0.309283	0.486819	0.964131244651425	0.112666176977413	0.580398294754495	3.59658461649159e-06	0.000110569710769578	0.882878154113846	1	0.504563012683582	0.00420359806785415	0.103711142175486	2.39194712645115e-08	0	0	0	1	1	0	0	1	0	0	0
TanjilG_06397	OIW19088	ferritin 2	LG01	14085875	14088919	1414.38	-0.0658383	3.1689	-0.16567	1.2095	-1.24431	-1.45733	1.41426	2.64223	-1.36445	-0.157901	4.46602	0.992783508851695	0.00175510089119921	1	0.614297542523075	0.496139594108509	0.495201534309956	1	2.12136105499949e-07	0.312495865763324	0.234381365463103	0.00597375252182264	0	1	0	0	0	0	0	1	0	0	1
TanjilG_06416	OIW05004	protein YLS3-like isoform X1	LG09	8139669	8140691	34.7919	0.228483	-1.48902	1.7612	6.70704	2.1138	1.26654	0.638067	5.17011	-0.629669	-2.74636	6.32596	0.992783508851695	0.759181048434969	0.858390274210644	0.00636749196118588	0.601044334422296	1	0.822252175414738	0.00108108045540067	0.794696288633225	0.907638813691238	0.00905888543570323	0	0	0	1	0	0	0	1	0	0	1
TanjilG_06443	OIW17758	GDSL esterase/lipase At3g48460-like	LG01	34655027	34656644	313.293	-0.982111	-0.804387	-0.296622	-3.27909	-3.2026	-0.791142	-1.61376	-3.95756	-0.343075	-0.574926	-1.06936	0.609259258092436	0.717073975206834	1	0.00452697350071587	0.00327052383989571	0.995160533363077	1	0.396353192222244	0.709743881149012	0.183503764882828	3.47237111667455e-05	0	0	0	-1	-1	0	0	-1	0	0	0
TanjilG_06446	OIW17761	PREDICTED: uncharacterized protein LOC109362386	LG01	34639244	34640089	1444.97	2.28238	0.215882	0.336652	-0.533846	0.0852608	-2.24575	0.441932	0.129441	-2.06665	-0.269678	1.65314	0.00432780895394402	0.963347138298241	0.99907155110569	0.86112035262163	1	0.0262353671096934	1	0.0192688465040755	0.00534019085349365	0.725183694451868	0.971889107150715	1	0	0	0	0	-1	0	0	-1	0	0
TanjilG_06485	OIW09679	probable indole-3-acetic acid-amido synthetase GH3.1	LG06	20249628	20252342	34.4849	-1.37795	1.66573	-0.355042	2.34277	6.0228	1.63995	1.73169	3.71959	-0.298744	2.94557	5.16778	0.640468647738294	0.552253255599395	1	0.458546039789128	0.010664961104492	1	0.608123974093034	0.000392043470194222	0.53133980615272	0.401011289119639	0.0183641885614646	0	0	0	0	1	0	0	1	0	0	1
TanjilG_06529	OIV99224	transcription repressor MYB6-like	LG13	3620846	3622208	17.613	0.0929691	-2.74663	0.89294	8.14579	2.16635	-0.0989995	2.56161	4.87906	-4.19471	-0.488222	6.21954	0.992783508851695	0.592418357208303	1	0.00483071312515245	0.63766111776977	0.346579657871216	1	0.0141833196059365	1	0.347020603586705	0.0292553114684921	0	0	0	1	0	0	0	1	0	0	1
TanjilG_06637	OIW20217	G-type lectin S-receptor-like serine/threonine-protein kinase CES101	Scaffold_15_200	30655	34184	231.011	0.587211	3.39468	1.57413	2.77148	0.61032	0.0438694	0.733369	2.39321	0.602056	-0.67511	0.937206	0.633499680899291	5.04624222368354e-09	0.0955362144484742	1.13348605375657e-05	0.675675329415159	0.733659686180326	0.948158946977884	0.166235528863478	1	0.350210894645157	1.64038085969588e-05	0	1	0	1	0	0	0	1	0	0	0
TanjilG_06799	OIV95823	probable F-box protein At4g22030	LG16	3745344	3746615	105.774	0.691887	1.77213	-2.32892	-0.652114	2.87486	1.02989	2.16258	1.29172	-1.6943	1.68231	2.58095	0.775879726361831	0.186557154786168	0.141994090728166	0.898329480376926	0.0113148011878925	0.34509486202173	0.636504062999986	0.00787276169745252	0.554836520332131	0.0454998869689078	0.277599821084894	0	0	0	0	1	0	1	0	0	0	1
TanjilG_06847	OIV95871	transmembrane protein 45A-like	LG16	4216487	4217275	199.769	4.35782	1.5393	0.559927	0.377134	1.72438	2.3153	1.78799	6.47811	3.17732	-0.958008	9.99909	0.0190027224016889	0.616356219315426	1	1	0.594863695294311	0.268584416224735	1	2.32830133173756e-10	0.331461863427879	0.402447934421261	1.69586504494347e-05	1	0	0	0	0	0	0	1	0	0	1
TanjilG_07050	OIV97298	CASP-like protein 1B1	LG15	2453292	2454504	57.6131	-1.33125	-0.770724	1.93469	10.0189	2.91376	2.03417	0.0228304	5.58328	0	-3.35132	10.7089	0.884273203491627	0.964911944787764	0.912992100124637	0.00171073796392351	0.56458021489143	1	0.869569835307152	6.22430287203072e-05	0.718113729421557	1	0.0356528913633912	0	0	0	1	0	0	0	1	0	0	1
TanjilG_07360	OIV98925	protein DETOXIFICATION 49-like	LG13	8249350	8250882	18.0923	-1.20943	4.47773	1.53523	0.593765	-2.62528	7.83435	4.74661	9.49368	1.89244	2.7241	5.62837	0.880383076256678	0.163858423260455	0.967834106789053	1	0.679655605989587	0.828844708636174	0.963489188471967	0.0406306637121503	0.0176548486603465	0.155890185372984	0.00037151815571643	0	0	0	0	0	1	0	1	0	0	1
TanjilG_07456	OIV95300	protein TIFY 3-like	LG16	16980082	16982219	92.3496	1.77799	2.44932	-0.217743	2.85047	1.34002	0.339955	1.06686	4.50965	0.80252	0.795425	-0.534395	0.239589109956553	0.0446512476830818	1	0.0223176670514889	0.489145348010742	0.821381366952342	0.998569103390663	0.740887227215058	0.943754520733964	0.455734028745395	1.44763369724505e-06	0	1	0	1	0	0	0	1	0	0	0
TanjilG_07518	OIW20261	50S ribosomal protein L27, chloroplastic-like	Scaffold_16_114	35512	37694	19.6299	2.72107	2.27725	-5.25482	-6.61795	-4.80425	0.112605	-0.476662	-3.17858	-1.46086	-0.0177899	-1.04348	0.130653192930865	0.276365020136158	0.0730719186846861	0.00219922673893697	0.0454934057372467	0.645658229906614	1	0.543129940526936	1	0.888313038475604	0.0167677585958725	0	0	0	-1	-1	0	0	-1	0	0	0
TanjilG_07573	OIV92582	CRIB domain-containing protein RIC10-like	LG18	16484493	16485080	49.5455	-0.276334	0.087258	-0.0815982	-2.49189	0.155435	0.815698	-0.588334	-2.40912	2.25603	0.0979027	-1.80229	0.950377131419969	1	1	0.0166119377975251	1	0.0395786635736701	1	0.0205647069864794	0.574120303957255	0.641190696287569	0.001527919582609	0	0	0	-1	0	0	0	-1	1	0	0
TanjilG_07693	OIW07651	AT-hook motif nuclear-localized protein 20-like	LG07	14032749	14033561	600.045	0.587132	0.487578	1.16827	3.36882	3.06473	-0.827954	2.23847	2.51732	0.0344928	0.853113	0.406333	0.867900047948492	0.901768412609953	0.799244986170198	0.00902056184257612	0.0135930716046938	1	1	0.850915558393386	0.725598686902482	0.0685639121435749	0.0270741303920285	0	0	0	1	1	0	0	1	0	0	0
TanjilG_08077	OIW15280	PREDICTED: uncharacterized protein LOC109342584	LG03	14908320	14909048	3226.03	-2.12132	-1.44195	1.13607	0.816546	-1.04061	0.179674	0.871542	-2.48046	-1.11751	-1.17696	-3.69705	0.00514233477780956	0.0815626078383969	0.468722022273624	0.627880981676851	0.332728537160261	0.357684981327728	0.552155271433544	2.32830133173756e-10	0.971742325745139	0.306960136287325	7.57723404141277e-05	-1	0	0	0	0	0	0	-1	0	0	-1
TanjilG_08101	OIW21698	PREDICTED: uncharacterized protein LOC109340411	Scaffold_168_25	40874	42175	52.1455	0.0170749	3.31454	-0.0547021	0.807568	1.01127	-0.2415	0.748365	5.69307	1.03595	1.10714	6.69829	0.996334214716953	0.0462617325515335	1	0.914640162676341	0.767344040009282	0.833913167647263	0.996260757542799	1.09387988706427e-08	1	0.802277778891357	5.90080879248927e-06	0	1	0	0	0	0	0	1	0	0	1
TanjilG_08265	OIW00826	PREDICTED: uncharacterized protein LOC109361753	LG12	5685527	5687971	222.307	1.7134	2.07533	1.11657	1.99468	0.648793	-0.31879	1.83694	3.38985	-0.401816	0.946988	2.49043	0.0193742843130711	0.00199652467746545	0.417124019643133	0.00483071312515245	0.625132814523167	0.886770120817594	0.735408467018082	8.87722477446641e-06	0.857926228894127	0.00526819435713528	1.11723416222172e-09	0	1	0	0	0	0	0	1	0	0	1
TanjilG_08343	OIW07228	vacuolar amino acid transporter 1-like	LG08	3267688	3269701	124.428	1.74159	1.91871	1.96728	1.24527	2.72035	0.72458	1.81164	3.98807	-0.124061	1.38491	3.75171	0.0625088595084836	0.029541669845118	0.0828677097098903	0.365985955514893	0.000375084173422408	1	0.475837709760333	1.1245874857119e-08	0.606016836070853	0.0253825863282185	2.36629208510218e-09	0	0	0	0	1	0	0	1	0	0	1
TanjilG_08514	OIW02367	B3 domain-containing transcription factor NGA1-like isoform X1	LG11	4822278	4823573	37.8138	0.44768	1.96639	2.22175	3.98877	0.0150635	0.679159	2.31363	5.94847	-0.192757	1.20774	6.18355	0.953493097899201	0.308168461278654	0.469282855619533	0.043232507407868	1	1	0.973474904704338	3.18016105252272e-06	0.853923078597992	0.121893418590948	1.28892069795189e-05	0	0	0	1	0	0	0	1	0	0	1
TanjilG_08612	OIW04729	WAT1-related protein At1g43650	LG09	13471808	13473488	144.073	-2.00046	-1.3089	-0.858042	-1.04849	-0.0768094	0.436539	-1.83741	-2.46604	-0.860208	-0.319706	-2.12004	0.0364919015033461	0.19915457000749	0.751243229114759	0.514018660014977	1	0.677110589017462	1	0.00360875298657326	0.82245513327973	0.0227952656750205	0.000653040165593977	-1	0	0	0	0	0	0	-1	0	0	-1
TanjilG_08645	OIW04762	extracellular ribonuclease LE	LG09	14205650	14208325	53.0823	0.187845	1.04722	1.34185	2.04865	0.872795	-1.02319	-0.988352	2.58263	-0.543062	0.490439	2.78721	0.983420957390669	0.361820944409444	0.369632943164622	0.019123749477847	0.523125326409231	0.849937237202348	1	1.15296476438569e-05	0.352086624696819	0.283883733121759	8.97100661821165e-05	0	0	0	1	0	0	0	1	0	0	1
TanjilG_08906	OIW19106	trihelix transcription factor GT-3b-like	LG01	12405356	12406823	137.796	1.965	1.29015	1.10305	1.77569	2.02757	0.306537	1.53445	2.61983	-0.559629	0.499901	3.30351	0.0266109269059758	0.210907709487131	0.580398294754495	0.0732395575793284	0.0134708050813757	0.842692411657279	1	4.32681605403019e-07	0.909437775147963	0.0666622682803292	0.000190951204367886	0	0	0	0	1	0	0	1	0	0	1
TanjilG_08973	OIV91561	peroxidase 43-like	LG19	17716320	17720282	12.3831	-4.02782	0.854403	3.32145	7.42372	1.12287	5.13765	0.548461	6.31195	-1.89582	-3.82452	6.14424	0.297899475185341	0.935845999471944	0.580398294754495	0.0166119377975251	0.895843405852707	0.881289595135493	0.707960471464468	0.0170451062359491	0.142073007188427	0.946581357862356	0.00696288290167692	0	0	0	1	0	0	0	1	0	0	1
TanjilG_09042	OIV91630	transcription factor MYB34-like	LG19	17202113	17203770	47.8265	0.53006	1.19937	0.831899	4.83218	1.09838	0.997968	1.05495	3.22199	-1.12831	-0.142647	4.10384	0.890483888290493	0.547943510149823	0.914139892993957	4.79732093396912e-05	0.648476394242357	0.795224217297325	1	0.000328521298837322	0.651155724348093	0.500783994430585	0.00272867904459105	0	0	0	1	0	0	0	1	0	0	1
TanjilG_09124	OIW00643	hypothetical protein TanjilG_09124	LG12	10170567	10170866	19.8772	0.765295	-0.179129	0.477616	-0.225731	-1.64888	0.869031	2.82749	4.12933	-1.13685	0.0765457	3.40915	0.757644893164329	1	1	1	0.35736671096683	0.804714706705641	1	0.00374044563855805	0.776631371901857	0.0238502636718311	0.00267629844548482	0	0	0	0	0	0	1	1	0	0	1
TanjilG_09150	OIW18956	probable WRKY transcription factor 9 isoform X1	LG01	18505200	18508138	8.85341	3.00272	2.34908	3.08791	7.75668	3.82884	0	2.03781	8.23501	-1.68119	0.989234	7.03303	0.622464692222353	0.691494227201763	0.750026428231166	0.0438053858051366	0.422021341954943	0.938521703228812	1	0.0191486851791331	1	0.726850031459416	0.00592106600869081	0	0	0	1	0	0	0	1	0	0	1
TanjilG_09206	OIV96664	NAC domain-containing protein	LG15	17111427	17112676	3381.98	1.29384	3.08543	0.497566	0.948927	1.5579	1.47981	1.6515	3.68478	0.510018	1.5356	4.43282	0.184084890715302	8.17631714262207e-06	0.934712848590464	0.563262510132564	0.084330610921268	0.860901287469547	0.251614504811541	5.62032241213873e-13	0.113767947217402	0.0323704305433255	6.22364809858431e-09	0	1	0	0	0	0	0	1	0	0	1
TanjilG_09324	OIW13973	basic 7S globulin-like	LG04	6172421	6173680	525.556	1.69163	2.26089	3.19029	1.55817	1.84812	1.75473	1.80375	3.74315	2.8359	2.99398	4.31171	0.301521179083934	0.115112030105909	0.0409327101471973	0.531397914530625	0.285973059136078	0.0684998897242326	0.0555939323148802	2.00449643680912e-05	0.280445274899454	0.176191683198936	0.000437603484543963	0	0	1	0	0	0	0	1	0	0	1
TanjilG_09547	OIV98054	peroxidase P7-like	LG14	10204513	10208326	894.883	1.45454	-0.586095	1.44077	5.09169	0.808095	3.08697	1.20223	5.85746	-0.428787	0.899936	5.51907	0.642227651509754	0.935102991729258	0.86122394109421	0.00700561276726377	0.907018142765469	1	1	0.000214325094661997	0.146737826496743	0.631528098735515	9.35388560935628e-05	0	0	0	1	0	0	0	1	0	0	1
TanjilG_09550	OIV98057	superoxide dismutase [Mn], mitochondrial	LG14	10306484	10309351	1114.24	0.245651	2.22444	0.733353	0.681044	-0.00647538	0.79695	1.38618	2.10727	1.64614	0.20562	4.7185	0.968267770516058	0.0130272215771892	0.86109180502814	0.82216454129706	1	0.197838876743641	1	1.35187854924282e-11	0.589103077074031	0.13905962753167	0.00887446974252855	0	1	0	0	0	0	0	1	0	0	1
TanjilG_09574	OIV98081	protein ENHANCED DISEASE RESISTANCE 4	LG14	10614330	10617692	144.357	-0.171301	1.15534	0.340191	0.979663	2.76815	1.3892	2.04159	1.40886	0.0120892	1.37551	2.98308	0.992783508851695	0.297005676978628	1	0.586025854826577	0.000213856914191341	1	0.506006814856176	1.21246616338767e-05	0.177514641007632	0.00951967237224194	0.0815654594854227	0	0	0	0	1	0	1	0	0	0	1
TanjilG_09600	OIW20391	protein DOWNY MILDEW RESISTANCE 6	Scaffold_19_69	104453	108617	72.5779	2.33254	2.8443	0.0271418	1.01155	-0.147257	2.47102	0.981354	1.56344	0.455945	2.62665	5.12557	0.063197365777212	0.00695292254527476	1	0.728636548305128	1	0.960045773334391	0.0613020035579371	5.01882043649547e-09	0.0410999555899959	0.462966351350208	0.145378595826602	0	1	0	0	0	1	0	0	0	0	1
TanjilG_09793	OIV96366	zinc finger protein ZAT10-like isoform X1	LG15	20200736	20201482	501.711	1.23896	2.48084	-2.99857	0.572204	3.11324	2.09666	1.9031	1.95564	0.106005	2.31208	1.25092	0.449132584944768	0.0330055933801968	0.0217067780273425	0.928990083339908	0.00300984563324299	1	0.168814130279348	0.274239107872394	0.107195279376673	0.093015940680194	0.0660452999524383	0	1	-1	0	1	0	0	0	0	0	0
TanjilG_09880	OIV98228	alcohol dehydrogenase	LG14	4571196	4574593	2522.84	0.836299	3.71067	0.874812	0.113573	2.33547	1.8162	1.72141	2.14169	3.89062	1.58726	8.50962	0.771129235312634	0.00333035960229807	0.924158791379846	1	0.153419811547682	0.00785300114622996	0.853710390744567	6.92223308621546e-17	0.306086289127218	0.241752898939943	0.101098259999711	0	1	0	0	0	0	0	0	1	0	1
TanjilG_09887	OIV98235	PREDICTED: uncharacterized protein LOC109326535	LG14	4935835	4936215	12.0365	-0.900408	2.38559	-0.207767	1.50341	1.69474	2.33981	2.97176	2.73111	3.13576	0.429623	3.78492	0.739103232843277	0.153819526593461	1	0.572877503229418	0.386425924635636	0.293875707648636	1	0.00104153081482751	0.134259912643327	0.0311379416712135	0.0313983493685351	0	0	0	0	0	0	1	1	0	0	1
TanjilG_10132	OIW07159	26S protease regulatory subunit 10B	LG08	4750219	4750473	31.1735	3.94859	3.84929	-0.288352	3.97443	7.87664	3.47197	3.342	5.39075	2.08089	3.67949	6.6761	0.0919793228855967	0.100265766960373	1	0.19596815091726	0.000692749191260787	0.624957872861687	0.368928214130286	7.17014604673939e-05	0.152753339438509	0.0991115917930056	0.00271069592533829	0	0	0	0	1	0	0	1	0	0	1
TanjilG_10149	OIW07176	AT-hook motif nuclear-localized protein 19-like	LG08	4548041	4548931	92.6282	1.57363	0.757101	1.22383	1.33002	1.14172	0.208561	2.59433	2.67939	0.874136	4.35662	4.92569	0.280583060497612	0.737164231711418	0.727037968731442	0.570570916458991	0.582280027945598	0.860901287469547	0.158543469124834	7.97530014861791e-05	0.993660728669647	0.0149822449960439	0.0071433579994558	0	0	0	0	0	0	1	1	0	0	1
TanjilG_10400	OIW01239	suppressor of disruption of TFIIS-like	LG11	34109364	34111220	610.012	-0.106543	-1.24661	-0.940384	-0.136461	-0.730415	-2.27657	-2.37202	-1.68397	-2.31516	-0.11204	-0.446999	0.992783508851695	0.333395288815617	0.783713987903741	1	0.735347847950443	0.0476525397194139	1	0.744127728582426	0.0316668717646229	0.00866684915529683	0.0692803243325757	0	0	0	0	0	-1	-1	0	-1	0	0
TanjilG_10469	OIW01308	serine/threonine-protein kinase OXI1-like	LG11	34850102	34852126	31.1519	1.46497	3.57961	0.830632	1.75392	4.26203	1.71199	2.89213	2.36067	4.72749	2.83901	5.15218	0.54791938815355	0.0249694938028898	0.967022081174796	0.613349656838068	0.00581341583507178	0.125841587513576	0.872896207026667	0.000108721463032251	0.455023583907692	0.0828933476162955	0.124819845994068	0	1	0	0	1	0	0	0	0	0	1
TanjilG_10695	OIV90395	hypothetical protein TanjilG_10695	LG20	14552768	14553034	134.06	0.131178	2.03682	0.460491	1.15719	2.50591	1.0094	0.149774	1.65937	1.17141	1.07942	2.51643	0.992783508851695	0.000403008583325063	0.896027404374327	0.186361540974843	6.03608181636439e-06	0.190498430962441	0.428520780221324	3.20430583720814e-07	0.20041651450845	0.94347378667977	0.00237726169694849	0	1	0	0	1	0	0	0	0	0	1
TanjilG_10805	OIW21782	zinc finger protein CONSTANS-LIKE 2-like	Scaffold_203_33	9445	11698	185.711	0.118407	-0.561684	-0.454146	0.121893	-5.39596	3.83292	-4.16109	-3.58317	-0.513924	-0.282919	-2.80283	0.992783508851695	0.948273994256902	1	1	0.0474945454442656	1	1	0.147769671455073	0.0662928795215503	0.0218434826004625	0.0389735064026104	0	0	0	0	-1	0	-1	-1	0	0	0
TanjilG_10908	OIW21792	NDR1/HIN1-like protein 10	Scaffold_206_4	4416	5102	45.9142	0.593015	3.69579	-2.96912	-0.713904	3.49527	2.40272	1.94485	0.719405	-2.44113	4.46564	0.958422	0.871715279437306	0.00911105833258502	0.072360182317832	0.902369943452751	0.00464146749977705	0.185476703144825	0.0263874912635756	0.505074770148439	0.146068106779405	0.166146167964388	0.69555629153686	0	1	0	0	1	0	0	0	0	1	0
TanjilG_10940	OIW11738	hypothetical protein TanjilG_10940	LG05	17287084	17287275	20.2999	0.825499	3.1402	3.34955	5.60483	7.33687	4.27526	4.76374	5.99884	3.70969	2.23534	8.45142	0.936473526993272	0.339578586347435	0.600957678018057	0.139762681604807	0.00558162425197552	0.377433615240868	0.96911706308839	0.00044778838183029	0.157326452433737	0.0919627318169711	0.0168749264323632	0	0	0	0	1	0	0	1	0	0	1
TanjilG_10966	OIW11764	protein DETOXIFICATION 43-like	LG05	17979835	17983428	4241.71	0.93632	-2.14336	-0.920117	-0.0255978	-0.134898	1.38921	-2.56636	-2.5	-0.687963	-1.09747	-2.24514	0.59008154991836	0.0571793705761359	0.832207622284887	1	1	0.85175202983698	0.924653599346623	0.0150069446029511	0.321264317581381	0.00865347130457989	0.00721974867587139	0	0	0	0	0	0	-1	-1	0	0	-1
TanjilG_10974	OIW21798	GDSL esterase/lipase EXL1-like	Scaffold_209_13	7820	14499	872.907	0.0355673	-0.0655092	-1.09376	-2.55838	-3.34181	-0.958108	-0.889893	-2.60657	-0.187732	0.545291	-0.920388	0.992783508851695	1	0.498271199673292	0.00022865076774226	1.61439115089136e-07	1	0.994558874901108	0.218058181329309	0.341156738329418	0.288335428713324	2.51276767061488e-05	0	0	0	-1	-1	0	0	-1	0	0	0
TanjilG_11165	OIW21803	---NA---	Scaffold_210_26	22261	23448	10.6087	2.54684	4.1776	1.47934	0.374961	0.981105	0.488092	0.856656	6.38073	0.628768	1.54467	4.50471	0.320020333562767	0.0331857764344922	0.834077885954833	1	0.869253187197301	0.974732609249525	0.962951236325401	0.00141230969739437	0.95706237716126	0.775079315323894	0.000423852680810468	0	1	0	0	0	0	0	1	0	0	1
TanjilG_11292	OIW09154	LOB domain-containing protein 1-like	LG06	30471230	30475519	27.3236	-0.829628	0.710589	0.131805	2.13372	1.53125	-0.208586	2.27136	2.03909	0.128288	0.43504	3.64816	0.746557593935658	0.777086845667995	1	0.127804552573579	0.341320463292699	1	1	0.000148197904165168	0.991948764821837	0.0292568619614073	0.0420635366678427	0	0	0	0	0	0	1	1	0	0	1
TanjilG_11359	OIW09221	probable WRKY transcription factor 50	LG06	30945994	30946829	69.919	3.54623	2.98765	1.45053	1.61532	4.17988	5.33445	4.06045	1.20744	0	2.67566	4.88494	0.191092394196893	0.25579326184265	0.908164806084418	0.806064173754214	0.10086218434558	1	0.877422582386946	0.00845865679325499	0.0134890187516818	0.0407320453564642	0.677673230739536	0	0	0	0	0	1	1	0	0	0	1
TanjilG_11416	OIW14071	hypothetical protein TanjilG_11416	LG04	5036468	5036850	51.4902	2.33264	2.1583	1.08425	0.937224	1.53435	1.1267	2.35146	3.32129	0.420886	0.679537	2.69489	0.0660106063750563	0.0837192754485279	0.817492132681781	0.805698213583234	0.364254003108919	0.969219212431515	1	0.00538978981228681	0.519324315651872	0.0289806098961306	0.00070527168746152	0	0	0	0	0	0	1	1	0	0	1
TanjilG_11525	OIW06800	lysine-specific demethylase JMJ25-like isoform X2	LG08	8536169	8547389	339.175	2.06608	2.57874	1.58446	-0.348641	0.710587	1.5634	0.898005	2.20313	1.58915	0.246914	3.62067	0.114167183663128	0.0206148362190524	0.521376023949912	0.995989711168723	0.816084856635879	0.377047232423341	1	4.90130803450727e-05	0.269313504862688	0.527381507771155	0.0286424166904919	0	1	0	0	0	0	0	1	0	0	1
TanjilG_11712	OIW06025	PREDICTED: uncharacterized protein LOC109355185	LG08	21997412	21997750	166.808	1.38494	1.43791	0.427596	0.607073	2.33662	1.63742	0.620057	2.17131	0.124211	2.01843	1.5201	0.145777054827593	0.120004143990734	0.968251876416675	0.818135814016268	0.00176312526427473	1	0.0400242250434273	0.035144301993428	0.0745233703498448	0.574006318222848	0.00175185624767143	0	0	0	0	1	0	0	1	0	1	0
TanjilG_11890	OIW07732	hypothetical protein TanjilG_11890	LG07	12029539	12031474	315.354	0.285306	-0.298226	0.355195	0.260636	-0.0425749	-0.300987	0.874135	0.155803	14.7264	-21.9447	15.734	0.944866586110137	0.929311223552188	1	1	1	4.7277621508306e-13	5.16022198684368e-57	5.25199988695492e-18	0.92085807465419	0.404897870343157	0.962064007373548	0	0	0	0	0	0	0	0	1	-1	1
TanjilG_11962	OIW07328	proline dehydrogenase 2, mitochondrial-like	LG08	2296834	2299545	118.019	5.40615	0.943742	-0.257683	1.79438	2.64682	0.772176	1.41668	4.16789	1.22506	0.248596	5.87159	0.00027577518053974	0.774042726312419	1	0.588450592514133	0.172284030761469	0.768651706958089	1	1.15822406415416e-06	0.824514093168206	0.453208684927367	0.00189135467232806	1	0	0	0	0	0	0	1	0	0	1
TanjilG_12037	OIW05446	axial regulator YABBY 1-like isoform X1	LG09	820586	824540	9.45102	5.70065	0.354958	-1.74075	0.940391	-17.145	5.97459	1.58296	-2.2296	-16.4061	0	-16.1716	0.390940232218453	1	1	1	7.72739926990383e-05	0.00171588081778136	1	9.48464247248839e-05	0.360710363106855	0.87728654994762	0.760396586749912	0	0	0	0	-1	0	0	0	-1	0	-1
TanjilG_12095	OIW14502	IAA-amino acid hydrolase ILR1-like 6 isoform X1	LG03	27625058	27638398	44.9695	0.731962	2.77544	0.353191	0.435057	0.2393	2.00775	0.226889	2.41142	3.83504	-0.755991	-0.425787	0.778248778514734	0.0157293402312051	1	0.97717524885936	1	0.00186296218672029	1	0.831813568790977	0.17526965088872	0.970855244244329	0.0209850691998169	0	1	0	0	0	0	0	1	1	0	0
TanjilG_12190	OIV98154	ethylene-responsive transcription factor ERF114-like	LG14	8294557	8296338	227.118	0.408555	4.37734	7.23387	4.43202	5.52959	3.00873	4.18504	7.51496	0.469491	4.47559	6.92315	0.992783508851695	0.0999981138546701	0.0298041447753972	0.254569351218545	0.0775806469167804	1	0.429284333563509	0.00186729457700276	0.297042981407033	0.0688735707837598	0.000136945142688067	0	0	1	0	0	0	0	1	0	0	1
TanjilG_12242	OIW00838	leucoanthocyanidin dioxygenase-like	LG12	4687719	4691781	357.667	2.50806	7.55696	-3.02828	11.1733	3.04803	4.56208	3.299	4.73664	0.74986	0.836858	2.64402	0.400858774707195	0.000101402230999662	0.531415489158088	2.16021572324387e-06	0.311228775391949	0.975482112601194	1	0.212862848944924	0.0546994532232629	0.1405588154534	0.0132059468355927	0	1	0	1	0	0	0	1	0	0	0
TanjilG_12426	OIV97669	putative nucleobase-ascorbate transporter 10	LG14	15392481	15396459	6.90843	-2.47178	1.35678	1.42691	1.62586	8.17759	-4.17581	3.05877	-4.77522	3.46293	-4.15669	3.46928	0.507810451145683	0.775751363263198	0.911344292670472	0.793413339792552	0.000221363562867048	0.459804153392446	0.510104425807749	0.0466089640202367	0.185668981316131	0.297636876819183	0.0444099294400196	0	0	0	0	1	0	0	-1	0	0	1
TanjilG_12658	OIV97901	random slug protein 5-like	LG14	13375024	13376742	269.402	-0.0755001	-0.359198	-1.2952	-2.33797	-4.14079	-1.18294	-1.11227	-2.43068	-0.83988	-0.503638	-1.27723	0.992783508851695	0.912372026053339	0.570369385012803	0.0263263351201219	5.70230994456223e-07	0.731413309005435	1	0.183202192251127	0.365733043595014	0.308344613481348	0.00390015896234536	0	0	0	-1	-1	0	0	-1	0	0	0
TanjilG_12696	OIV97939	hypothetical protein TanjilG_12696	LG14	12910476	12910721	65.5683	1.28605	1.49599	1.9553	0.942215	1.05447	1.88455	2.28225	2.92503	0.126999	2.1745	2.76296	0.306797498122361	0.197932197472828	0.174561498924679	0.685791870571743	0.501301856099643	1	0.0862536326873618	0.000440688832196261	0.076234743595983	0.00853131335876063	0.000201464014983905	0	0	0	0	0	0	1	1	0	0	1
TanjilG_12800	OIW00859	ferritin 1	LG12	4079502	4082955	152.686	-0.340523	3.74196	0.64214	-0.0362982	-0.14327	0.259953	1.25428	2.86777	-0.72121	-0.821029	5.37437	0.961399439019538	0.000515672493782061	0.963390217520917	1	1	0.871660222551643	1	3.73864682916532e-08	0.979267021259257	0.364888219828321	0.00603317350046083	0	1	0	0	0	0	0	1	0	0	1
TanjilG_12802	OIW00861	abscisic acid receptor PYL4-like	LG12	3986827	3987462	310.817	0.27505	3.47024	1.24955	0.842705	3.29453	1.7014	1.49941	2.3505	2.02719	2.77988	0.232298	0.984968426998418	0.00221037023046076	0.742141008594958	0.856557737641404	0.00941215061504227	0.235364532915957	0.0755449202827054	0.939123456823994	0.254988922982976	0.251287291572707	0.0292056436844636	0	1	0	0	1	0	0	1	0	0	0
TanjilG_12962	OIV94749	GDSL esterase/lipase At2g23540-like	LG17	2031704	2033669	31.5662	0.239398	2.28384	-0.162241	9.22341	2.77759	-2.82777	0.636937	7.50962	-6.72207	-4.47824	4.86809	0.992783508851695	0.678420434113692	1	0.00152387715625574	0.520653102917106	0.0744584143671375	0.500530051499849	0.0478395543443397	0.510462884552044	0.930777881495458	0.00156298665594769	0	0	0	1	0	0	0	1	0	0	1
TanjilG_13192	OIW18440	cytochrome P450 77A1 isoform X3	LG01	20304223	20306437	11.0056	6.2302	0.452316	-1.16206	4.80657	-18.2062	21.62	-2.33857	-1.50571	-17.0926	-1.41509	0	0.399475022812533	1	1	0.728148469848245	0.00010981380134609	0.00260246654704222	1	1	9.44792378284477e-06	0.806509242508444	0.891307518387943	0	0	0	0	-1	1	0	0	-1	0	0
TanjilG_13202	OIW18450	primary amine oxidase-like isoform X1	LG01	20371790	20375312	528.037	5.8846	18.4391	0.631042	-19.4777	-0.807565	4.09831	3.34464	9.47442	4.23096	2.23321	3.5392	0.0968773118423406	5.09044136423721e-12	1	6.33451616732855e-14	0.999062314027789	0.338835131064929	0.983525254623233	0.274192977812722	0.2415241310325	0.29495221701093	4.3920654682802e-05	0	1	0	-1	0	0	0	1	0	0	0
TanjilG_13264	OIW18512	UDP-glucose 6-dehydrogenase 1-like	LG01	20744957	20746354	520.735	0.845428	2.23291	0.999789	0.383009	0.881036	0.787211	0.832544	2.26702	0.397735	0.672492	3.41044	0.279377540405322	2.84582942568496e-05	0.385879698816853	0.881504554684526	0.294627061173015	0.853688221980106	0.896841021502482	2.17996230210384e-13	0.333107368750828	0.202133701448689	4.26020806807508e-06	0	1	0	0	0	0	0	1	0	0	1
TanjilG_13319	OIW18567	protein kinase PINOID 2-like	LG01	21185923	21187846	21.3658	2.48858	0.645818	0.374346	3.83087	-0.53385	0.853215	3.2537	2.46277	0.607519	0.230983	0.951656	0.0347329817022531	0.78125834319823	1	0.0719272000735843	0.909146223359189	0.87814259089762	1	0.390806660998018	0.614572548958464	0.00110768037105274	0.00651517120509876	1	0	0	0	0	0	1	1	0	0	0
TanjilG_13331	OIW18579	ethylene-responsive transcription factor WIN1-like	LG01	21261423	21262202	58.1978	-0.323665	-0.480955	-1.30283	-2.34778	-3.48647	-0.349669	-1.89418	-3.52601	-0.47791	-1.00716	-1.93322	0.941845141708523	0.856673392719774	0.607017091049184	0.0392732685687454	0.0021692006355283	0.929634394099356	0.933641650441637	0.0375668124107416	0.917486935264533	0.0538619484386366	2.5992804625334e-05	0	0	0	-1	-1	0	0	-1	0	0	0
TanjilG_13472	OIW18720	putative transcription factor bHLH041	LG01	22491412	22495147	245.671	1.44815	1.75556	3.61486	1.90491	6.5046	3.92299	2.58012	6.17307	2.62434	2.43519	9.1241	0.658468379520327	0.549180181830521	0.204341389999889	0.66415580755737	8.6934231094371e-05	0.39395196578518	0.746576361531628	2.34816308493389e-09	0.0551187216966675	0.187510014176934	5.71813034998579e-05	0	0	0	0	1	0	0	1	0	0	1
TanjilG_13473	OIW18721	putative transcription factor bHLH041	LG01	22498221	22501956	242.566	1.42156	1.76571	3.59986	1.92446	6.47859	3.88688	2.58998	6.27399	2.6464	2.42795	9.10495	0.667525200126447	0.54302891789649	0.204341389999889	0.655395000883395	8.88998869843758e-05	0.38392005207025	0.746576361531628	2.31841055163903e-09	0.0576412104210947	0.183528791314093	3.91159932215398e-05	0	0	0	0	1	0	0	1	0	0	1
TanjilG_13540	OIW18788	PREDICTED: uncharacterized protein LOC109356647 isoform X1	LG01	23072718	23073117	19.3578	-0.179114	5.32356	3.1228	4.555	2.36159	2.91818	2.71361	5.90968	0.925101	2.40484	4.07012	0.992783508851695	0.0207936139969482	0.431329136610635	0.125135771252533	0.535339124081234	0.909101779246343	0.75918941655154	0.0136216615673475	0.182593364276392	0.197598125829756	0.000631125155237011	0	1	0	0	0	0	0	1	0	0	1
TanjilG_13548	OIW18796	PREDICTED: uncharacterized protein LOC109356763	LG01	23156953	23157441	166.918	0.300234	0.33455	0.585586	3.74361	2.03672	-1.43857	1.03465	3.63417	-2.31315	-0.0746211	5.87558	0.992783508851695	0.97825967247367	0.999938411603174	0.0126035676435084	0.306081223991324	0.314795580869123	1	4.42858751511299e-07	0.523198896154058	0.591955082782468	0.00354510654271835	0	0	0	1	0	0	0	1	0	0	1
TanjilG_13571	OIW06385	ethylene-responsive transcription factor ABR1-like isoform X1	LG08	13378204	13380288	506.012	1.17644	4.44043	-0.1044	0.128802	-0.0407875	0.267233	0.25615	2.21893	1.85076	-0.232348	2.41544	0.349468476814004	1.46603188626485e-08	1	1	1	0.136595923551125	1	0.00211680083507912	0.950896173639916	0.918957991003829	0.00707137822729586	0	1	0	0	0	0	0	1	0	0	1
TanjilG_13605	OIW02968	hypothetical protein TanjilG_13605	LG10	16074226	16079910	136.045	-0.371142	-1.18369	-1.3359	-1.91334	-3.17248	-0.293194	-3.4289	-3.90762	-1.93397	-0.281121	-1.3158	0.91909565682829	0.389834382363559	0.567115722573839	0.133248142849461	0.000437503798437628	0.161080044318573	1	0.179422845441221	0.947572868896306	0.000137701315401623	2.39033315014215e-06	0	0	0	0	-1	0	-1	-1	0	0	0
TanjilG_13787	OIV94170	U-box domain-containing protein 21-like	LG17	10613025	10614335	23.3618	2.55609	2.27506	1.10524	2.73392	4.74428	1.49081	2.62717	6.93055	1.64684	4.02871	3.49136	0.288189328869646	0.381753090756573	0.955982635474924	0.497042472582792	0.0185240776803216	0.726924912790655	0.131430681255595	0.0343153870166735	0.636626806590915	0.202248579164548	0.000406532603641702	0	0	0	0	1	0	0	1	0	0	1
TanjilG_13823	OIW01959	ABA-activated 1 protein	LG11	12077609	12079591	7851.63	2.07484	2.31547	1.9681	0.125497	0.435065	0.754021	1.51734	4.29073	0.108328	1.54048	2.80306	0.0597715582900093	0.021864050535841	0.202091145055461	1	0.916247398669131	1	0.562360605550188	0.000743793830605862	0.667739105531742	0.141888118506844	6.77544174981263e-08	0	1	0	0	0	0	0	1	0	0	1
TanjilG_13910	OIW04528	protein TIFY 10a-like	LG09	17740679	17742608	27.242	0.789133	4.00076	-0.343985	2.05262	0.680821	3.16482	1.46522	3.49683	0.658497	0.78936	4.35641	0.873892937862913	0.0121172420379052	1	0.473364713803072	0.904226161462397	0.941042973059794	1	0.000585811672947316	0.0659516950896364	0.421973840372669	0.00618516727080941	0	1	0	0	0	0	0	1	0	0	1
TanjilG_14085	OIV97985	pathogen-related protein-like	LG14	11839997	11842010	2742.7	0.718536	3.04061	1.06944	0.740604	0.8293	1.38546	1.28952	3.68715	1.3876	1.77445	4.15825	0.496028445846336	2.44626239720937e-07	0.460217029323427	0.647646147772272	0.463032379719642	0.137663298392794	0.0305417644348249	5.11010867752646e-15	0.081059264778729	0.0606446331422517	1.18513946908499e-11	0	1	0	0	0	0	0	1	0	0	1
TanjilG_14089	OIV97989	stearoyl-[acyl-carrier-protein] 9-desaturase 6, chloroplastic-like	LG14	11908064	11910675	313.928	-2.38065	-0.816616	-1.80513	-0.449205	0.307348	0.959511	-1.7163	-2.19541	0.442748	-0.715186	-2.42465	0.00110498972282864	0.427940917137258	0.044353367716231	0.88461561264532	0.921868835972711	0.871605370658225	0.937894714310467	3.8804017545724e-05	0.31907186972352	0.0112535542441222	0.000380697207419715	-1	0	0	0	0	0	0	-1	0	0	-1
TanjilG_14361	OIV91782	glycine-rich cell wall structural protein-like	LG19	14670535	14671659	313.07	0.421742	-0.833664	0.335392	-3.60768	-5.61923	-1.33901	-2.13045	-2.91654	0.312353	-0.26594	-1.19891	0.959236796897386	0.793078402933055	1	0.0200303389696333	6.14884873378457e-06	1	1	0.586110995278508	0.551068702092824	0.156503429807171	0.0274653821535295	0	0	0	-1	-1	0	0	-1	0	0	0
TanjilG_14378	OIV91799	probable WRKY transcription factor 35	LG19	14469839	14473182	81.2106	1.9286	1.55034	0.767909	1.45292	1.88688	3.63117	0.884441	2.99301	-0.109153	0.534421	5.88984	0.258779472434697	0.413282422806991	0.954224016535479	0.626776180524436	0.331031266038971	1	1	1.36895558112959e-07	0.013308252761385	0.643708493203197	0.0120906873748842	0	0	0	0	0	1	0	1	0	0	1
TanjilG_14384	OIV91805	berberine bridge enzyme-like 8	LG19	14341140	14342432	154.97	2.23456	1.83542	2.05574	9.3917	1.66267	2.82661	2.90857	8.79987	2.64056	0.381554	6.30546	0.558606497006774	0.697504142358386	0.836692328481726	0.000217282057908609	0.773233554400501	0.589675471454457	1	0.0021812657938989	0.396833751970029	0.275828218632937	4.11043468411339e-05	0	0	0	1	0	0	0	1	0	0	1
TanjilG_14660	OIW03435	probable carboxylesterase 2	LG10	5468780	5471068	40.2786	1.10391	-0.965878	-0.414151	-1.27032	-2.29834	-0.844805	-2.29857	-2.7207	-0.811793	-1.04296	-0.514976	0.327079981994104	0.434951107008621	0.983654043689954	0.367566354138254	0.010071924887099	0.827114746456777	0.878255857439769	0.696989033263368	0.588324468118964	0.00762083453658805	0.000596967159598035	0	0	0	0	-1	0	-1	-1	0	0	0
TanjilG_14742	OIV90344	carbonic anhydrase, chloroplastic-like isoform X2	LG20	17025015	17028896	656.509	1.9443	-0.347486	-1.27952	-3.64082	-2.35505	-1.55791	-2.6957	-5.75789	-0.729146	0.0381752	-1.04538	0.209667931801644	0.960368507718119	0.760878834383349	0.00375088052704496	0.105762213113947	0.886241654321686	1	0.464512516544111	0.371289302843686	0.0256422905685327	8.31451349207866e-09	0	0	0	-1	0	0	-1	-1	0	0	0
TanjilG_14770	OIW05217	PREDICTED: polygalacturonase-like	LG09	5070949	5075144	252.802	4.11052	3.00567	3.73813	-2.49114	-0.0412818	-1.91296	-0.211254	4.73582	-16.0437	-18.4052	8.87903	0.220343291038462	0.493144556609802	0.569553711357547	0.730044974436574	1	1.02513456893361e-07	2.35931242162391e-12	0.000184841181073721	0.705511240352335	1	0.0708975743580395	0	0	0	0	0	0	0	0	-1	-1	1
TanjilG_14852	OIW20554	peroxidase 25-like	Scaffold_27_4	31713	34391	24.4601	0.22683	0.705886	-1.26022	0.887788	-1.01484	1.2204	-3.05383	-0.105341	4.06123	0.821828	-2.64008	0.992783508851695	0.810288495720825	0.774971527197166	0.84657536533885	0.719471143729595	0.00525745288409667	1	0.0457442133268946	0.618045240157826	0.0356961810350323	1	0	0	0	0	0	0	-1	0	1	0	-1
TanjilG_15103	OIV90717	3-ketoacyl-CoA synthase 11-like	LG20	7082602	7085039	573.95	-0.181124	0.089138	-0.408675	-1.28707	-2.18358	-0.089174	-0.791376	-2.05136	-0.203533	0.559937	-2.18272	0.977173466309405	1	0.957421950885424	0.19615860924025	0.00108017096802989	1	0.983525254623233	0.000259526508524139	1	0.345178054806692	0.000931749169161355	0	0	0	0	-1	0	0	-1	0	0	-1
TanjilG_15112	OIV90726	myb-related protein Myb4-like	LG20	7258278	7260649	1004.8	0.906396	1.3646	0.370633	0.888752	2.60038	1.97841	1.10258	3.18349	0.503484	0.927191	2.26229	0.314191833440969	0.0646065438499546	0.96333871229164	0.483490540079155	7.1786278354983e-06	0.80404016063559	0.720936624502992	4.21622386274901e-05	0.00390549671771801	0.114158493120349	3.70751905309404e-09	0	0	0	0	1	0	0	1	0	0	1
TanjilG_15128	OIW02245	protein MIZU-KUSSEI 1	LG11	6188042	6188857	56.834	-1.31832	0.100653	1.43771	7.01406	3.44273	0.592106	1.44226	3.71677	-2.31686	0.169284	6.3335	0.668669684872725	1	0.834509471877074	8.53966472899375e-05	0.060820570566765	0.410030272973488	1	1.4699898218902e-05	0.915837150335047	0.486894072501542	0.0141012455930354	0	0	0	1	0	0	0	1	0	0	1
TanjilG_15231	OIW01906	protein PIN-LIKES 3-like	LG11	13959098	13962750	30.6034	-0.56334	-1.73039	0.00961907	-1.40756	-2.61901	2.07894	-2.94282	-1.29972	-0.597587	0.164668	-2.5489	0.778630843561571	0.0862784413423362	1	0.36443465837549	0.0199911839171716	0.851350718762604	1	0.00465285952355352	0.075359343138026	0.00277990060047935	0.166439182188529	0	0	0	0	-1	0	-1	0	0	0	-1
TanjilG_15352	OIW14439	PREDICTED: uncharacterized protein LOC109342648	LG03	28948443	28948937	76.5819	0.783173	2.64693	1.08198	2.36485	0.24191	-0.668839	1.10145	2.97771	-0.169388	-0.399569	0.942006	0.61180521959773	0.00190771514294874	0.672143006435858	0.0141973185756305	0.990871527315476	1	1	0.340505049002666	0.681497657708292	0.282565352499717	0.000130124122459734	0	1	0	1	0	0	0	1	0	0	0
TanjilG_15459	OIW13010	hypothetical protein TanjilG_15459	LG04	22437711	22438037	1024.99	0.995328	1.69898	-0.710628	0.216486	1.58665	2.8618	1.19771	3.43987	0.722848	0.71287	4.12728	0.615402854388519	0.246085973186691	0.939378524020928	1	0.343627422500793	0.8679253024315	1	9.94838355900692e-06	0.0201220786032886	0.385267314981861	0.000504393916418473	0	0	0	0	0	1	0	1	0	0	1
TanjilG_15495	OIV90762	hypothetical protein TanjilG_15495	LG20	6134062	6152993	469.822	1.19686	1.06343	1.3682	2.58744	0.986093	0.341883	2.02547	2.20385	-0.698662	1.32011	1.8992	0.0558064448768984	0.0926910765841594	0.0589460878159787	1.28803263380578e-07	0.156339498161912	0.510544761585116	0.0664410807185896	3.66431394079838e-05	0.766026358655292	5.86640307712764e-05	1.55280495340759e-06	0	0	0	1	0	0	1	1	0	0	0
TanjilG_15578	OIV90845	E3 ubiquitin-protein ligase ATL6	LG20	5251546	5252679	2255.27	0.866856	1.55743	0.300778	0.430639	2.10313	1.8184	1.44836	2.68146	0.526932	1.24336	2.96552	0.22756705688651	0.00437639764417123	0.971102193837239	0.82216454129706	1.97861883700605e-05	0.703863390254462	0.116481363812247	2.17846861429606e-11	0.00128137062490041	0.00651568277498399	3.70130355964443e-09	0	0	0	0	1	0	0	1	0	0	1
TanjilG_15635	OIV90902	PREDICTED: uncharacterized protein LOC109336577	LG20	4817369	4817866	4884.71	0.247565	-0.108002	-0.623118	-2.70028	-3.647	-1.18864	-1.34598	-3.86275	-0.677652	0.248135	-1.73962	0.969229873832409	1	0.915232379073146	0.0030460047875367	2.76477972428156e-06	0.804782449102983	1	0.0362730088773144	0.335998294577126	0.163669227332926	1.63475459640265e-07	0	0	0	-1	-1	0	0	-1	0	0	0
TanjilG_15636	OIV90903	PREDICTED: uncharacterized protein LOC109335248	LG20	4811126	4811626	206.352	-0.518803	-0.893924	-1.6167	-2.52698	-4.3135	-1.06758	-1.61461	-3.57332	-1.19914	-0.471489	-1.35262	0.839713996156607	0.604478614120714	0.423745724905685	0.0232135663827582	8.73107685505972e-07	0.548790975840235	1	0.193556752667668	0.479294057738263	0.122448034916348	2.71421211329884e-05	0	0	0	-1	-1	0	0	-1	0	0	0
TanjilG_15668	OIW04923	linoleate 9S-lipoxygenase 1-like isoform X2	LG09	9159032	9164144	38467.5	2.65139	1.18784	1.30368	0.892292	1.41081	2.77973	0.81373	3.43951	0.0523063	0.434191	1.98222	0.00845048090493435	0.388044480739212	0.581780654541544	0.739620756515164	0.305352720028555	1	1	0.023917012878616	0.00516305120485189	0.523003480867538	2.37098496544775e-05	1	0	0	0	0	1	0	1	0	0	0
TanjilG_15744	OIW14390	MLP-like protein 31	LG03	29681337	29682990	7250.16	0.381147	-0.454935	0.729649	2.19583	3.00491	0.0608765	1.09331	3.22261	0.189423	-0.500344	0.373594	0.89317617635363	0.839620662069649	0.85865504165444	0.0250158119411207	0.000143311557223048	1	1	0.781719826929062	1	0.275292700900348	1.25392213804153e-05	0	0	0	1	1	0	0	1	0	0	0
TanjilG_15822	OIW12902	hypothetical protein TanjilG_15822	LG04	23845503	23845997	110.634	1.89284	2.82904	-1.42277	0.116922	5.44881	2.16649	2.64776	4.86554	-1.82275	2.03397	3.47328	0.302106946075141	0.0615882605481173	0.755729947889921	1	1.44662590493504e-05	0.466514738145383	0.672774933061896	0.00328967102865313	0.218032412768911	0.0571852313712836	3.11705593702423e-05	0	0	0	0	1	0	0	1	0	0	1
TanjilG_15840	OIW12920	rust resistance kinase Lr10-like isoform X1	LG04	23630224	23632483	62.7718	0.280218	-0.0988441	0.237306	0.322154	0.18865	2.23999	2.72481	1.88293	-0.256141	-0.314694	2.47795	0.947800816628798	1	1	0.977908890933296	1	1	1	0.00275617306807761	0.0399464677223631	0.00118526850621688	0.0261840292949857	0	0	0	0	0	1	1	0	0	0	1
[truncated: 34,368 more rows]

## Sheet: Table_S9
Resistance of narrow-leafed lupin to Diaporthe toxica is based on rapid activation of defense response genes
[truncated: 94 more rows]

[truncated: 3 more sheets: Table_S10, Table_S11, Table_S12]
